# Supplementary material for: Molecular Signatures of Mitochondrial Complexes Involved in Alzheimer’s Disease via Oxidative Phosphorylation and Retrograde Endocannabinoid Signaling Pathways
Source: Hindawi journal article supplement (doi:10.1155/2022/9565545), 2022-01-01
Supplement: f1 [file 9565545.f1.pdf]

| Sample     | Group   | Age | Gender |
|------------|---------|-----|--------|
| GSM119641  | Control | 85  | Male   |
| GSM119642  | Control | 80  | Male   |
| GSM119643  | Control | 102 | Female |
| GSM119644  | Control | 63  | Male   |
| GSM119645  | Control | 79  | Male   |
| GSM119646  | Control | 83  | Male   |
| GSM119647  | Control | 79  | Male   |
| GSM119648  | Control | 88  | Female |
| GSM119650  | Control | 73  | Female |
| GSM119651  | Control | 69  | Male   |
| GSM119652  | Control | 78  | Male   |
| GSM238809  | AD      | 73  | Female |
| GSM238810  | AD      | 81  | Male   |
| GSM238811  | AD      | 72  | Male   |
| GSM238812  | AD      | 75  | Male   |
| GSM238813  | AD      | 78  | Male   |
| GSM238815  | AD      | 75  | Male   |
| GSM238816  | AD      | 87  | Male   |
| GSM238817  | AD      | 90  | Female |
| GSM238818  | AD      | 68  | Male   |
| GSM238819  | AD      | 81  | Female |
| GSM238820  | AD      | 85  | Female |
| GSM238821  | AD      | 79  | Male   |
| GSM238822  | AD      | 82  | Female |
| GSM238823  | AD      | 88  | Male   |
| GSM238824  | AD      | 72  | Male   |
| GSM238825  | AD      | 80  | Female |
| GSM3332689 | AD      | 84  | Female |
| GSM3332693 | Control | 82  | Female |
| GSM3332697 | Control | 51  | Female |
| GSM3332703 | Control | 92  | Female |
| GSM3332721 | AD      | 66  | Male   |
| GSM3332729 | AD      | 96  | Female |
| GSM3332735 | AD      | 72  | Female |
| GSM3332737 | AD      | 93  | Female |
| GSM3332742 | Control | 52  | Female |
| GSM3332753 | Control | 87  | Female |
| GSM3332755 | Control | 81  | Male   |
| GSM3332762 | Control | 77  | Male   |

|            |         |     |        |
|------------|---------|-----|--------|
| GSM3332773 | AD      | 88  | Male   |
| GSM3332789 | AD      | 90  | Female |
| GSM3332790 | AD      | 97  | Male   |
| GSM3332794 | AD      | 89  | Male   |
| GSM3332800 | Control | 91  | Female |
| GSM3332805 | AD      | 88  | Male   |
| GSM3332810 | AD      | 85  | Female |
| GSM3332811 | Control | 95  | Male   |
| GSM3332814 | AD      | 86  | Male   |
| GSM3332819 | AD      | 85  | Female |
| GSM3332821 | Control | 78  | Male   |
| GSM3332824 | AD      | 83  | Female |
| GSM3332829 | Control | 73  | Male   |
| GSM3332835 | Control | 86  | Male   |
| GSM3332841 | AD      | 80  | Male   |
| GSM3332843 | Control | 40  | Male   |
| GSM3332854 | AD      | 71  | Male   |
| GSM3332870 | AD      | 82  | Female |
| GSM3332871 | AD      | 69  | Male   |
| GSM3332876 | AD      | 75  | Male   |
| GSM3332883 | AD      | 96  | Female |
| GSM3332885 | Control | 80  | Male   |
| GSM3332891 | AD      | 72  | Male   |
| GSM3332893 | AD      | 81  | Female |
| GSM3332899 | AD      | 105 | Male   |
| GSM3332902 | AD      | 67  | Male   |
| GSM3332906 | AD      | 92  | Female |
| GSM3332909 | AD      | 79  | Female |
| GSM3332911 | AD      | 87  | Female |
| GSM3332925 | AD      | 84  | Female |
| GSM3332927 | AD      | 81  | Male   |
| GSM3332932 | AD      | 71  | Female |
| GSM3332941 | AD      | 80  | Female |
| GSM3332944 | AD      | 79  | Female |
| GSM3332946 | AD      | 76  | Male   |
| GSM3332949 | Control | 78  | Male   |
| GSM3332954 | AD      | 66  | Male   |
| GSM3332960 | Control | 41  | Male   |
| GSM3332977 | AD      | 79  | Male   |
| GSM3332984 | AD      | 90  | Female |

|            |         |     |        |
|------------|---------|-----|--------|
| GSM3332990 | Control | 51  | Male   |
| GSM3332993 | AD      | 95  | Female |
| GSM3332996 | Control | 67  | Male   |
| GSM3332999 | AD      | 83  | Female |
| GSM3333004 | AD      | 68  | Male   |
| GSM3333016 | Control | 43  | Female |
| GSM3333022 | AD      | 89  | Male   |
| GSM3333032 | AD      | 90  | Male   |
| GSM3333038 | Control | 66  | Male   |
| GSM3333039 | AD      | 88  | Female |
| GSM3333044 | AD      | 63  | Female |
| GSM3333050 | AD      | 83  | Female |
| GSM3333053 | Control | 88  | Female |
| GSM3333070 | AD      | 98  | Female |
| GSM3333079 | Control | 80  | Female |
| GSM3333082 | Control | 65  | Male   |
| GSM3333088 | Control | 73  | Female |
| GSM3895951 | Control | 90  | Female |
| GSM3895952 | Control | 82  | Male   |
| GSM3895953 | Control | 88  | Female |
| GSM3895954 | Control | 92  | Female |
| GSM3895955 | Control | 91  | Male   |
| GSM3895956 | Control | 87  | Female |
| GSM3895957 | Control | 86  | Male   |
| GSM3895958 | Control | 78  | Male   |
| GSM3895959 | Control | 87  | Male   |
| GSM3895960 | Control | 79  | Male   |
| GSM3895961 | Control | 77  | Female |
| GSM3895962 | Control | 77  | Male   |
| GSM3895963 | Control | 88  | Female |
| GSM3895964 | Control | 85  | Male   |
| GSM3895965 | Control | 95  | Female |
| GSM3895966 | Control | 102 | Female |
| GSM3895967 | Control | 89  | Male   |
| GSM3895968 | Control | 70  | Male   |
| GSM3895969 | Control | 82  | Female |
| GSM3895970 | Control | 73  | Female |
| GSM3895971 | Control | 90  | Male   |
| GSM3895972 | Control | 94  | Male   |
| GSM3895973 | Control | 96  | Female |

|            |         |     |        |
|------------|---------|-----|--------|
| GSM3895974 | Control | 85  | Female |
| GSM3895975 | Control | 84  | Male   |
| GSM3895976 | Control | 83  | Male   |
| GSM3895977 | Control | 90  | Female |
| GSM3895978 | Control | 87  | Female |
| GSM3895979 | Control | 85  | Male   |
| GSM3895980 | Control | 83  | Female |
| GSM3895981 | Control | 84  | Male   |
| GSM3895982 | Control | 88  | Male   |
| GSM3895983 | Control | 98  | Female |
| GSM3895984 | Control | 85  | Male   |
| GSM3895985 | Control | 86  | Female |
| GSM3895986 | Control | 87  | Female |
| GSM3895987 | Control | 89  | Male   |
| GSM3895988 | Control | 92  | Male   |
| GSM3895989 | Control | 78  | Female |
| GSM3895990 | Control | 77  | Female |
| GSM3895991 | Control | 91  | Male   |
| GSM3895992 | Control | 100 | Male   |
| GSM3895993 | Control | 82  | Male   |
| GSM3895994 | Control | 87  | Female |
| GSM3895995 | Control | 73  | Male   |
| GSM3895996 | Control | 75  | Male   |
| GSM3895997 | Control | 82  | Male   |
| GSM3895998 | Control | 90  | Female |
| GSM3895999 | Control | 96  | Female |
| GSM3896000 | Control | 84  | Female |
| GSM3896001 | Control | 80  | Male   |
| GSM3896002 | Control | 86  | Male   |
| GSM3896003 | Control | 91  | Female |
| GSM3896004 | Control | 91  | Female |
| GSM3896005 | Control | 94  | Female |
| GSM3896006 | Control | 87  | Male   |
| GSM3896007 | Control | 75  | Female |
| GSM3896008 | Control | 74  | Male   |
| GSM3896009 | Control | 76  | Male   |
| GSM3896010 | Control | 71  | Male   |
| GSM3896011 | Control | 87  | Male   |
| GSM3896012 | Control | 90  | Male   |
| GSM3896013 | Control | 80  | Male   |

|            |         |    |        |
|------------|---------|----|--------|
| GSM3896014 | Control | 84 | Male   |
| GSM3896015 | Control | 80 | Male   |
| GSM3896016 | Control | 89 | Male   |
| GSM3896017 | Control | 86 | Female |
| GSM3896018 | Control | 80 | Female |
| GSM3896019 | Control | 92 | Male   |
| GSM3896020 | Control | 83 | Female |
| GSM3896021 | Control | 86 | Female |
| GSM3896022 | Control | 91 | Female |
| GSM3896023 | Control | 95 | Female |
| GSM3896024 | Control | 95 | Female |
| GSM3896025 | Control | 82 | Female |
| GSM3896026 | Control | 85 | Female |
| GSM3896027 | Control | 87 | Female |
| GSM3896028 | Control | 95 | Male   |
| GSM3896029 | Control | 85 | Female |
| GSM3896030 | Control | 91 | Female |
| GSM3896031 | Control | 89 | Female |
| GSM3896032 | AD      | 80 | Male   |
| GSM3896033 | AD      | 87 | Female |
| GSM3896034 | AD      | 92 | Female |
| GSM3896035 | AD      | 77 | Female |
| GSM3896036 | AD      | 84 | Female |
| GSM3896037 | AD      | 91 | Female |
| GSM3896038 | AD      | 87 | Female |
| GSM3896039 | AD      | 97 | Female |
| GSM3896040 | AD      | 87 | Female |
| GSM3896041 | AD      | 78 | Male   |
| GSM3896042 | AD      | 76 | Male   |
| GSM3896043 | AD      | 81 | Male   |
| GSM3896044 | AD      | 80 | Male   |
| GSM3896045 | AD      | 86 | Female |
| GSM3896046 | AD      | 81 | Female |
| GSM3896047 | AD      | 79 | Male   |
| GSM3896048 | AD      | 91 | Female |
| GSM3896049 | AD      | 91 | Female |
| GSM3896050 | AD      | 89 | Female |
| GSM3896051 | AD      | 82 | Female |
| GSM3896052 | AD      | 92 | Female |
| GSM3896053 | AD      | 86 | Male   |

|            |    |    |        |
|------------|----|----|--------|
| GSM3896054 | AD | 82 | Female |
| GSM3896055 | AD | 86 | Female |
| GSM3896056 | AD | 80 | Male   |
| GSM3896057 | AD | 87 | Female |
| GSM3896058 | AD | 92 | Male   |
| GSM3896059 | AD | 90 | Female |
| GSM3896060 | AD | 88 | Female |
| GSM3896061 | AD | 90 | Male   |
| GSM3896062 | AD | 90 | Male   |
| GSM3896063 | AD | 72 | Male   |
| GSM3896064 | AD | 87 | Male   |
| GSM3896065 | AD | 75 | Male   |
| GSM3896066 | AD | 86 | Female |
| GSM3896067 | AD | 95 | Female |
| GSM3896068 | AD | 95 | Male   |
| GSM3896069 | AD | 88 | Female |
| GSM3896070 | AD | 87 | Male   |
| GSM3896071 | AD | 81 | Female |
| GSM3896072 | AD | 83 | Male   |
| GSM3896073 | AD | 85 | Female |
| GSM3896074 | AD | 95 | Female |
| GSM3896075 | AD | 81 | Male   |
| GSM3896076 | AD | 83 | Male   |
| GSM3896077 | AD | 85 | Male   |
| GSM3896078 | AD | 85 | Female |
| GSM3896079 | AD | 94 | Male   |
| GSM3896080 | AD | 97 | Male   |
| GSM3896081 | AD | 82 | Female |
| GSM3896082 | AD | 91 | Male   |
| GSM3896083 | AD | 92 | Male   |
| GSM3896084 | AD | 70 | Male   |
| GSM3896085 | AD | 84 | Male   |
| GSM3896086 | AD | 86 | Male   |
| GSM3896087 | AD | 95 | Female |
| GSM3896088 | AD | 88 | Male   |
| GSM3896089 | AD | 79 | Male   |
| GSM3896090 | AD | 87 | Male   |
| GSM3896091 | AD | 73 | Female |
| GSM3896092 | AD | 90 | Female |
| GSM3896093 | AD | 83 | Male   |

|            |         |    |        |
|------------|---------|----|--------|
| GSM3896094 | AD      | 85 | Female |
| GSM3896095 | AD      | 74 | Male   |
| GSM3896096 | AD      | 71 | Male   |
| GSM3896097 | AD      | 78 | Female |
| GSM3896098 | AD      | 82 | Male   |
| GSM3896099 | AD      | 85 | Male   |
| GSM3896100 | AD      | 96 | Female |
| GSM3896101 | AD      | 70 | Female |
| GSM3896102 | AD      | 78 | Female |
| GSM3896103 | AD      | 77 | Female |
| GSM3896104 | AD      | 87 | Female |
| GSM3896105 | AD      | 84 | Male   |
| GSM3896106 | AD      | 98 | Male   |
| GSM3896107 | AD      | 75 | Male   |
| GSM3896108 | AD      | 76 | Male   |
| GSM3896109 | AD      | 94 | Female |
| GSM3896110 | AD      | 84 | Male   |
| GSM3896111 | AD      | 75 | Female |
| GSM3896112 | Control | 75 | Male   |
| GSM3896113 | Control | 92 | Female |
| GSM3896114 | Control | 81 | Female |
| GSM3896115 | Control | 77 | Female |
| GSM3896116 | AD      | 88 | Male   |
| GSM3896117 | AD      | 87 | Female |
| GSM3896118 | AD      | 77 | Female |
| GSM3896119 | AD      | 93 | Male   |
| GSM3896120 | AD      | 97 | Female |
| GSM3896121 | AD      | 89 | Male   |
| GSM3896122 | AD      | 88 | Male   |
| GSM3896123 | AD      | 73 | Male   |
| GSM3896124 | AD      | 91 | Female |
| GSM3896125 | AD      | 91 | Female |
| GSM3896126 | Control | 78 | Female |
| GSM3896127 | AD      | 89 | Male   |
| GSM3896128 | AD      | 78 | Female |
| GSM3896129 | AD      | 90 | Female |
| GSM3896130 | AD      | 85 | Male   |
| GSM3896131 | AD      | 85 | Female |
| GSM3896132 | AD      | 82 | Male   |
| GSM3896133 | AD      | 82 | Male   |

|            |         |    |        |
|------------|---------|----|--------|
| GSM3896134 | Control | 72 | Male   |
| GSM3896135 | Control | 82 | Female |
| GSM3896136 | Control | 81 | Female |
| GSM3896137 | Control | 81 | Male   |
| GSM3896138 | Control | 79 | Male   |
| GSM3896139 | Control | 91 | Male   |
| GSM3896140 | Control | 81 | Male   |
| GSM3896141 | Control | 70 | Female |
| GSM3896142 | Control | 76 | Male   |
| GSM3896143 | Control | 90 | Male   |
| GSM3896144 | Control | 83 | Male   |
| GSM3896145 | Control | 83 | Male   |
| GSM907825  | AD      | 84 | Male   |
| GSM907826  | AD      | 88 | Female |
| GSM907827  | AD      | 95 | Female |
| GSM907828  | AD      | 88 | Male   |
| GSM907829  | AD      | 91 | Female |
| GSM907830  | AD      | 95 | Female |
| GSM907831  | AD      | 95 | Female |
| GSM907832  | AD      | 89 | Male   |
| GSM907833  | AD      | 83 | Male   |
| GSM907834  | AD      | 90 | Male   |
| GSM907835  | Control | 77 | Female |
| GSM907836  | Control | 87 | Female |
| GSM907837  | Control | 80 | Female |
| GSM907838  | Control | 84 | Female |
| GSM907839  | Control | 77 | Male   |
| GSM907840  | Control | 55 | Male   |
| GSM907841  | Control | 72 | Female |
| GSM907842  | Control | 89 | Male   |
| GSM907843  | Control | 82 | Male   |
| GSM907844  | Control | 78 | Female |
| GSM907845  | Control | 83 | Male   |
| GSM907846  | Control | 80 | Male   |
| GSM907847  | Control | 75 | Female |
| GSM907848  | Control | 89 | Male   |
| GSM907849  | Control | 65 | Female |
| GSM907850  | Control | 71 | Female |
| GSM907851  | Control | 74 | Male   |
| GSM907852  | Control | 86 | Female |



|           |         |    |        |
|-----------|---------|----|--------|
| GSM907853 | Control | 54 | Female |
| GSM915110 | Control | 85 | Male   |
| GSM915111 | Control | 77 | Male   |
| GSM915112 | AD      | 83 | Male   |
| GSM915113 | AD      | 67 | Male   |
| GSM915114 | AD      | 88 | Female |
| GSM915115 | AD      | 66 | Male   |
| GSM915116 | Control | 79 | Female |
| GSM915117 | Control | 87 | Male   |
| GSM915118 | Control | 66 | Male   |
| GSM915119 | AD      | 69 | Male   |
| GSM915120 | Control | 81 | Female |
| GSM915121 | AD      | 63 | Female |
| GSM915122 | AD      | 78 | Male   |
| GSM915123 | Control | 78 | Male   |
| GSM915124 | AD      | 67 | Female |
| GSM915125 | Control | 88 | Female |
