# Supplementary material for: Molecular Signatures of Mitochondrial Complexes Involved in Alzheimer’s Disease via Oxidative Phosphorylation and Retrograde Endocannabinoid Signaling Pathways
Source: Hindawi journal article supplement (doi:10.1155/2022/9565545), 2022-01-01
Supplement: f2 [file 9565545.f2.pdf]

| Gene.Symbol | moduleColor | GS.AD        | p.GS.AD     | MMyellow     | p.MMyellow  |
|-------------|-------------|--------------|-------------|--------------|-------------|
| ABLM2       | blue        | -0.286364071 | 5.24E-06    | -0.460832763 | 2.77E-14    |
| ACE2        | blue        | -0.212702365 | 0.000806028 | -0.163157111 | 0.01053017  |
| ACHE        | blue        | -0.260621608 | 3.63E-05    | -0.413619043 | 1.52E-11    |
| ACO2        | blue        | -0.188032699 | 0.003131513 | -0.541341308 | 4.70E-20    |
| ACTB        | blue        | -0.342457816 | 3.80E-08    | -0.643147142 | 5.37E-30    |
| ADAM32      | blue        | -0.188017201 | 0.00313403  | -0.243282823 | 0.00011984  |
| ALDOA       | blue        | -0.334376774 | 8.22E-08    | -0.616683286 | 4.63E-27    |
| ANKRD12     | blue        | 0.145114306  | 0.023097348 | 0.257775131  | 4.44E-05    |
| AP2M1       | blue        | -0.258058544 | 4.35E-05    | -0.478184995 | 2.11E-15    |
| AP3B2       | blue        | -0.328951992 | 1.36E-07    | -0.529980099 | 3.81E-19    |
| APBB3       | blue        | -0.277199271 | 1.07E-05    | -0.260284062 | 3.71E-05    |
| APEX1       | blue        | -0.266219956 | 2.42E-05    | -0.676450015 | 3.96E-34    |
| APLP1       | blue        | -0.316918532 | 4.05E-07    | -0.412666109 | 1.71E-11    |
| APLP2       | blue        | -0.345634892 | 2.78E-08    | -0.573683157 | 7.66E-23    |
| ARF3        | blue        | -0.3572778   | 8.68E-09    | -0.684361388 | 3.43E-35    |
| ARF5        | blue        | -0.417530578 | 9.37E-12    | -0.552977012 | 5.05E-21    |
| ARHGDIG     | blue        | -0.321549132 | 2.68E-07    | -0.543388257 | 3.19E-20    |
| ARHGEF11    | blue        | -0.282594237 | 7.04E-06    | -0.264126189 | 2.82E-05    |
| ARSG        | blue        | -0.255957871 | 5.04E-05    | -0.235230663 | 0.000202897 |
| ATP1A3      | blue        | -0.374651171 | 1.39E-09    | -0.425574132 | 3.38E-12    |
| ATP6V0D1    | blue        | -0.268112875 | 2.11E-05    | -0.515224676 | 5.16E-18    |
| ATP6V1F     | blue        | -0.32254584  | 2.45E-07    | -0.39791858  | 1.01E-10    |
| ATXN10      | blue        | -0.407322835 | 3.29E-11    | -0.44140563  | 4.18E-13    |
| BSG         | blue        | -0.221498337 | 0.000478071 | -0.309647315 | 7.65E-07    |
| CA11        | blue        | -0.196114304 | 0.002042521 | -0.382004735 | 6.21E-10    |
| CABP1       | blue        | -0.272209323 | 1.55E-05    | -0.308299118 | 8.59E-07    |
| CACNG3      | blue        | -0.388633733 | 2.95E-10    | -0.406697103 | 3.55E-11    |
| CADM3       | blue        | -0.228030404 | 0.000320043 | -0.351392083 | 1.57E-08    |
| CALY        | blue        | -0.321236331 | 2.76E-07    | -0.62841079  | 2.51E-28    |
| CAMK1G      | blue        | -0.348253754 | 2.15E-08    | -0.584925426 | 6.94E-24    |
| CAPNS1      | blue        | -0.345414006 | 2.84E-08    | -0.593124159 | 1.14E-24    |
| CARD8       | blue        | 0.314804168  | 4.89E-07    | 0.344914292  | 2.99E-08    |
| CEND1       | blue        | -0.257202113 | 4.62E-05    | -0.397147937 | 1.10E-10    |
| CHCHD10     | blue        | -0.253632669 | 5.93E-05    | -0.418827597 | 7.97E-12    |
| CHRM1       | blue        | -0.292095823 | 3.31E-06    | -0.528600342 | 4.89E-19    |
| CHST1       | blue        | -0.257118278 | 4.65E-05    | -0.485847779 | 6.44E-16    |
| CITED1      | blue        | -0.273131294 | 1.45E-05    | -0.284731886 | 5.95E-06    |
| CLPTM1      | blue        | -0.220658571 | 0.000502965 | -0.363081032 | 4.77E-09    |
| CLSTN1      | blue        | -0.409870049 | 2.42E-11    | -0.52018432  | 2.18E-18    |

|         |      |              |             |              |             |
|---------|------|--------------|-------------|--------------|-------------|
| CNTNAP1 | blue | -0.130415544 | 0.041389623 | -0.252993002 | 6.20E-05    |
| CORO1A  | blue | -0.211268534 | 0.000875964 | -0.423589365 | 4.36E-12    |
| CORO6   | blue | -0.249629521 | 7.81E-05    | -0.188971754 | 0.002982356 |
| CPLX1   | blue | -0.400372353 | 7.56E-11    | -0.397768026 | 1.03E-10    |
| CPLX2   | blue | -0.359924883 | 6.61E-09    | -0.420054496 | 6.82E-12    |
| CPNE9   | blue | -0.214169275 | 0.000739837 | -0.381440302 | 6.62E-10    |
| CRMP1   | blue | -0.359164787 | 7.15E-09    | -0.62490099  | 6.09E-28    |
| DDT     | blue | -0.327863011 | 1.51E-07    | -0.480511445 | 1.47E-15    |
| DDX24   | blue | -0.365200345 | 3.82E-09    | -0.688132848 | 1.04E-35    |
| DIRAS1  | blue | -0.29912642  | 1.86E-06    | -0.39293792  | 1.80E-10    |
| DNM1    | blue | -0.261434272 | 3.42E-05    | -0.25971619  | 3.87E-05    |
| DOC2A   | blue | -0.271986154 | 1.58E-05    | -0.569863645 | 1.70E-22    |
| DPP6    | blue | -0.44313874  | 3.31E-13    | -0.56400597  | 5.63E-22    |
| DYNC1H1 | blue | -0.292972448 | 3.09E-06    | -0.512149273 | 8.75E-18    |
| ENO2    | blue | -0.424951337 | 3.66E-12    | -0.562998585 | 6.90E-22    |
| ENTPD6  | blue | -0.280262496 | 8.43E-06    | -0.508745229 | 1.56E-17    |
| EPB41L1 | blue | -0.238832245 | 0.000160678 | -0.466061574 | 1.29E-14    |
| FANCE   | blue | 0.307236923  | 9.41E-07    | 0.563986131  | 5.65E-22    |
| FBXL16  | blue | -0.244533454 | 0.000110251 | -0.465678557 | 1.37E-14    |
| FKBP1A  | blue | -0.356987209 | 8.94E-09    | -0.655464995 | 1.83E-31    |
| GABRD   | blue | -0.331912428 | 1.04E-07    | -0.256854453 | 4.74E-05    |
| GAS7    | blue | -0.421541747 | 5.65E-12    | -0.504467645 | 3.19E-17    |
| GPI     | blue | -0.362186395 | 5.23E-09    | -0.565420157 | 4.22E-22    |
| GRINA   | blue | -0.342649857 | 3.73E-08    | -0.503621963 | 3.67E-17    |
| HMGA1   | blue | -0.329741807 | 1.27E-07    | -0.403675789 | 5.11E-11    |
| HPCA    | blue | -0.358243039 | 7.86E-09    | -0.453602185 | 7.76E-14    |
| HUWE1   | blue | -0.352898294 | 1.35E-08    | -0.312752259 | 5.85E-07    |
| IDH3G   | blue | -0.223856568 | 0.00041414  | -0.413132268 | 1.62E-11    |
| IFT74   | blue | 0.252245533  | 6.53E-05    | 0.456518076  | 5.14E-14    |
| IGSF21  | blue | -0.236323102 | 0.000189107 | -0.018041425 | 0.778732132 |
| INO80D  | blue | 0.280036696  | 8.58E-06    | 0.520822177  | 1.95E-18    |
| IRF2BP2 | blue | 0.223706096  | 0.00041797  | 0.30213939   | 1.45E-06    |
| KCNQ2   | blue | -0.195667507 | 0.00209226  | -0.125033026 | 0.050613138 |
| KCTD13  | blue | -0.359327777 | 7.03E-09    | -0.422888651 | 4.76E-12    |
| KLHDC9  | blue | -0.319858265 | 3.12E-07    | -0.51157222  | 9.66E-18    |
| KLHL35  | blue | -0.412497435 | 1.75E-11    | -0.251262687 | 6.99E-05    |
| L1CAM   | blue | -0.341205243 | 4.28E-08    | -0.567719781 | 2.64E-22    |
| LDOC1   | blue | -0.238656034 | 0.000162536 | -0.696456314 | 6.97E-37    |
| LINGO1  | blue | -0.383631771 | 5.18E-10    | -0.472621184 | 4.89E-15    |
| LY6E    | blue | -0.272957782 | 1.47E-05    | -0.461588086 | 2.48E-14    |

|          |      |              |             |              |             |
|----------|------|--------------|-------------|--------------|-------------|
| MAP1A    | blue | -0.245606416 | 0.000102603 | -0.407269669 | 3.31E-11    |
| MAP1S    | blue | -0.16630009  | 0.009110468 | -0.37819067  | 9.47E-10    |
| MAPK8IP2 | blue | -0.320701094 | 2.89E-07    | -0.345546077 | 2.81E-08    |
| MAPRE3   | blue | -0.206316765 | 0.001162737 | -0.249943737 | 7.65E-05    |
| MGRN1    | blue | -0.323505634 | 2.25E-07    | -0.453657405 | 7.70E-14    |
| MICAL2   | blue | -0.404698515 | 4.52E-11    | -0.51876256  | 2.80E-18    |
| MLF2     | blue | -0.309590517 | 7.69E-07    | -0.469920881 | 7.32E-15    |
| MPV17    | blue | -0.149747378 | 0.019018456 | -0.362545077 | 5.04E-09    |
| MRPL2    | blue | -0.352197723 | 1.45E-08    | -0.453861651 | 7.48E-14    |
| NCDN     | blue | -0.252401469 | 6.46E-05    | -0.387253109 | 3.45E-10    |
| NDUFV1   | blue | -0.289042253 | 4.23E-06    | -0.625124327 | 5.75E-28    |
| NECAB2   | blue | -0.289247777 | 4.16E-06    | -0.302834403 | 1.37E-06    |
| NEU1     | blue | -0.356717625 | 9.19E-09    | -0.476916767 | 2.56E-15    |
| NPDC1    | blue | -0.306181115 | 1.03E-06    | -0.557239933 | 2.19E-21    |
| NPM2     | blue | -0.239039779 | 0.000158515 | -0.418145066 | 8.68E-12    |
| NPTXR    | blue | -0.39191945  | 2.03E-10    | -0.545588036 | 2.10E-20    |
| NRGN     | blue | -0.227802423 | 0.00032462  | -0.448852831 | 1.51E-13    |
| NSUN6    | blue | 0.0197885    | 0.757941428 | 0.332860937  | 9.48E-08    |
| OGDHL    | blue | -0.304245242 | 1.21E-06    | -0.407689276 | 3.15E-11    |
| OLFM2    | blue | -0.261277056 | 3.46E-05    | -0.301746479 | 1.50E-06    |
| P4HTM    | blue | -0.219510499 | 0.000538943 | -0.252687458 | 6.33E-05    |
| PAK2     | blue | 0.346260011  | 2.62E-08    | 0.589967469  | 2.29E-24    |
| PCDH7    | blue | -0.225671297 | 0.000370449 | -0.487919232 | 4.65E-16    |
| PCSK1N   | blue | -0.271564461 | 1.63E-05    | -0.508942659 | 1.51E-17    |
| PDE1B    | blue | -0.286582397 | 5.15E-06    | -0.407236473 | 3.33E-11    |
| PEX11B   | blue | -0.435426084 | 9.33E-13    | -0.742298033 | 3.84E-44    |
| PFDN1    | blue | -0.247779216 | 8.86E-05    | -0.563335795 | 6.45E-22    |
| PIN1     | blue | -0.294387436 | 2.75E-06    | -0.405520943 | 4.09E-11    |
| PKNOX2   | blue | -0.283061945 | 6.78E-06    | -0.425103509 | 3.59E-12    |
| PNCK     | blue | -0.332346117 | 9.95E-08    | -0.22019802  | 0.000517122 |
| PNKD     | blue | -0.320422234 | 2.97E-07    | -0.4712783   | 5.98E-15    |
| PNMA6A   | blue | -0.252658035 | 6.35E-05    | -0.482732608 | 1.05E-15    |
| PPME1    | blue | -0.344303279 | 3.17E-08    | -0.336402879 | 6.79E-08    |
| PPP1R11  | blue | -0.218741832 | 0.000564349 | -0.517483797 | 3.49E-18    |
| PPP2R1A  | blue | -0.292424913 | 3.23E-06    | -0.230393788 | 0.000276005 |
| PPP2R2A  | blue | -0.249903992 | 7.67E-05    | -0.391047473 | 2.24E-10    |
| PRDX2    | blue | -0.226447702 | 0.000353098 | -0.697106143 | 5.62E-37    |
| PRKCG    | blue | -0.33861914  | 5.49E-08    | -0.562073641 | 8.32E-22    |
| PRTN3    | blue | -0.209710982 | 0.000958241 | -0.048763671 | 0.447361636 |
| PTK2B    | blue | -0.311731108 | 6.39E-07    | -0.384554301 | 4.67E-10    |

|          |      |              |             |              |             |
|----------|------|--------------|-------------|--------------|-------------|
| PTPRN    | blue | -0.403734019 | 5.07E-11    | -0.583940588 | 8.60E-24    |
| RGS6     | blue | -0.244433506 | 0.00011099  | -0.251003623 | 7.11E-05    |
| RHBDD2   | blue | -0.271516454 | 1.64E-05    | -0.217796345 | 0.000597117 |
| RNF19B   | blue | -0.225814126 | 0.000367199 | -0.597116483 | 4.62E-25    |
| RNMT     | blue | -0.33628726  | 6.86E-08    | -0.530476132 | 3.49E-19    |
| ROCK1    | blue | 0.259267955  | 3.99E-05    | 0.230579867  | 0.000272789 |
| RPS6KL1  | blue | -0.297012243 | 2.22E-06    | -0.202073678 | 0.001474563 |
| RUNDC3A  | blue | -0.335457803 | 7.42E-08    | -0.415859234 | 1.15E-11    |
| RWDD2B   | blue | -0.257257004 | 4.60E-05    | -0.253217085 | 6.10E-05    |
| SCAMP5   | blue | -0.318432971 | 3.54E-07    | -0.490118753 | 3.29E-16    |
| SCN1B    | blue | -0.268424395 | 2.06E-05    | -0.471247657 | 6.00E-15    |
| SEZ6L    | blue | -0.325717466 | 1.84E-07    | -0.352651188 | 1.39E-08    |
| SLC17A7  | blue | -0.296305956 | 2.35E-06    | -0.261026308 | 3.52E-05    |
| SLC23A1  | blue | -0.243768541 | 0.000116027 | -0.047274526 | 0.461371039 |
| SLC6A7   | blue | -0.199982554 | 0.001654889 | -0.132106509 | 0.03880169  |
| SLTM     | blue | 0.344960512  | 2.97E-08    | 0.283787883  | 6.41E-06    |
| SNCB     | blue | -0.284206386 | 6.20E-06    | -0.340093969 | 4.77E-08    |
| SNCG     | blue | -0.170800675 | 0.00737324  | -0.115718861 | 0.070590543 |
| STS      | blue | -0.323068449 | 2.34E-07    | -0.325081545 | 1.95E-07    |
| STX1A    | blue | -0.307996011 | 8.82E-07    | -0.626135666 | 4.46E-28    |
| STXBP1   | blue | -0.389902578 | 2.55E-10    | -0.818874647 | 1.60E-60    |
| SUPT4H1  | blue | -0.298195397 | 2.01E-06    | -0.46850194  | 9.03E-15    |
| SYN1     | blue | -0.324298767 | 2.09E-07    | -0.477307681 | 2.41E-15    |
| SYNGR3   | blue | -0.348050508 | 2.19E-08    | -0.656052907 | 1.55E-31    |
| SYP      | blue | -0.381289225 | 6.73E-10    | -0.540533757 | 5.46E-20    |
| SYT3     | blue | -0.278179075 | 9.89E-06    | -0.250791003 | 7.22E-05    |
| SYT5     | blue | -0.277909578 | 1.01E-05    | -0.280019545 | 8.59E-06    |
| TERF2    | blue | -0.245090002 | 0.00010622  | -0.658236893 | 8.37E-32    |
| THY1     | blue | -0.318767144 | 3.44E-07    | -0.250065243 | 7.58E-05    |
| TM7SF2   | blue | -0.35297692  | 1.34E-08    | -0.438205742 | 6.44E-13    |
| TMEM151A | blue | -0.205291179 | 0.001231991 | -0.174159416 | 0.006275985 |
| TPI1     | blue | -0.328324303 | 1.45E-07    | -0.462061455 | 2.32E-14    |
| TRIML1   | blue | -0.216083673 | 0.000660995 | -0.095889544 | 0.134475525 |
| TUBG2    | blue | -0.365491255 | 3.70E-09    | -0.305009465 | 1.14E-06    |
| UBA1     | blue | -0.208364686 | 0.001035028 | -0.380780165 | 7.12E-10    |
| USP11    | blue | -0.423461822 | 4.43E-12    | -0.486892434 | 5.47E-16    |
| USP5     | blue | -0.266780279 | 2.32E-05    | -0.444089754 | 2.90E-13    |
| VAMP2    | blue | -0.377006111 | 1.08E-09    | -0.659443359 | 5.94E-32    |
| VSTM2L   | blue | -0.298009705 | 2.04E-06    | -0.392843173 | 1.82E-10    |
| YJEFN3   | blue | -0.223808079 | 0.000415371 | -0.489897287 | 3.40E-16    |

|         |       |              |             |              |             |
|---------|-------|--------------|-------------|--------------|-------------|
| YWHAE   | blue  | -0.339979808 | 4.82E-08    | -0.547193558 | 1.55E-20    |
| ZHX2    | blue  | 0.300427796  | 1.67E-06    | 0.583072119  | 1.04E-23    |
| ZNF532  | blue  | 0.297801975  | 2.08E-06    | 0.368101598  | 2.81E-09    |
| AASS    | brown | 0.19363704   | 0.002332506 | 0.168537601  | 0.008205958 |
| ABCA1   | brown | 0.341873259  | 4.02E-08    | 0.473454394  | 4.31E-15    |
| ACACB   | brown | 0.415957636  | 1.14E-11    | 0.702306455  | 9.87E-38    |
| ACOT11  | brown | 0.299842563  | 1.76E-06    | 0.369412719  | 2.45E-09    |
| ACSBG1  | brown | 0.306838311  | 9.74E-07    | 0.43598833   | 8.66E-13    |
| ACSS1   | brown | 0.356703032  | 9.20E-09    | 0.574247364  | 6.81E-23    |
| ACSS3   | brown | 0.414324167  | 1.40E-11    | 0.370270592  | 2.23E-09    |
| ACTL6A  | brown | 0.461608677  | 2.47E-14    | 0.47466309   | 3.60E-15    |
| ADD3    | brown | 0.200921241  | 0.001571584 | 0.419169971  | 7.63E-12    |
| AHNAK   | brown | 0.429139651  | 2.13E-12    | 0.625615021  | 5.09E-28    |
| AKR1C3  | brown | 0.341755176  | 4.06E-08    | 0.509779924  | 1.31E-17    |
| ALDH6A1 | brown | 0.172738574  | 0.006720956 | 0.329478512  | 1.30E-07    |
| ANTXR1  | brown | 0.415691405  | 1.18E-11    | 0.451749107  | 1.01E-13    |
| ANTXR2  | brown | 0.473646701  | 4.19E-15    | 0.358351173  | 7.77E-09    |
| ARHGEF6 | brown | 0.409145279  | 2.64E-11    | 0.479976316  | 1.60E-15    |
| ASCL1   | brown | 0.47745084   | 2.36E-15    | 0.480703985  | 1.43E-15    |
| AXL     | brown | 0.342080927  | 3.94E-08    | 0.601788837  | 1.58E-25    |
| BAMBI   | brown | 0.295244125  | 2.56E-06    | 0.313508941  | 5.47E-07    |
| BBOX1   | brown | 0.326254702  | 1.75E-07    | 0.286414829  | 5.21E-06    |
| BCL2    | brown | 0.274832822  | 1.28E-05    | 0.469679225  | 7.58E-15    |
| BDH2    | brown | 0.361842228  | 5.42E-09    | 0.265705785  | 2.51E-05    |
| BMP7    | brown | 0.169185997  | 0.00795922  | 0.406469068  | 3.65E-11    |
| CAT     | brown | 0.264236281  | 2.80E-05    | 0.20274625   | 0.001420507 |
| CBFB    | brown | 0.284804638  | 5.92E-06    | 0.33371153   | 8.75E-08    |
| CDC14A  | brown | 0.361821652  | 5.43E-09    | 0.238795752  | 0.000161061 |
| CDK2AP1 | brown | 0.474312839  | 3.79E-15    | 0.434495241  | 1.06E-12    |
| CEBPB   | brown | 0.335419114  | 7.45E-08    | 0.349190104  | 1.96E-08    |
| CGNL1   | brown | 0.405087016  | 4.31E-11    | 0.579829545  | 2.09E-23    |
| CMBL    | brown | 0.356148291  | 9.74E-09    | 0.230112672  | 0.00028093  |
| CMTM4   | brown | 0.333687423  | 8.77E-08    | 0.377237497  | 1.05E-09    |
| COLEC12 | brown | 0.410039903  | 2.37E-11    | 0.128859284  | 0.043898303 |
| CYBRD1  | brown | 0.229376426  | 0.00029422  | 0.200117949  | 0.001642629 |
| DBI     | brown | 0.383372191  | 5.34E-10    | 0.396628829  | 1.17E-10    |
| DDIT4L  | brown | 0.39956274   | 8.32E-11    | 0.555297155  | 3.21E-21    |
| DNALI1  | brown | 0.470664181  | 6.55E-15    | 0.618028979  | 3.34E-27    |
| DPY19L4 | brown | 0.272683171  | 1.50E-05    | 0.174828403  | 0.00607575  |
| EFEMP2  | brown | 0.403247001  | 5.37E-11    | 0.67041868   | 2.43E-33    |

|         |       |             |             |             |             |
|---------|-------|-------------|-------------|-------------|-------------|
| EFHC2   | brown | 0.268781702 | 2.01E-05    | 0.257532391 | 4.51E-05    |
| ELF1    | brown | 0.473625284 | 4.20E-15    | 0.45202856  | 9.68E-14    |
| EMX2    | brown | 0.339481949 | 5.06E-08    | 0.406587177 | 3.60E-11    |
| EPS8    | brown | 0.358253992 | 7.85E-09    | 0.331327858 | 1.09E-07    |
| EYA1    | brown | 0.220648529 | 0.00050327  | 0.237403832 | 0.00017633  |
| EYA2    | brown | 0.273579689 | 1.40E-05    | 0.389815419 | 2.58E-10    |
| EZR     | brown | 0.4781773   | 2.11E-15    | 0.618735554 | 2.81E-27    |
| FAM107A | brown | 0.360432392 | 6.28E-09    | 0.40090394  | 7.10E-11    |
| FAM167A | brown | 0.342820232 | 3.66E-08    | 0.440282417 | 4.87E-13    |
| FARP1   | brown | 0.307113341 | 9.51E-07    | 0.595948461 | 6.01E-25    |
| FAT1    | brown | 0.308129847 | 8.72E-07    | 0.518938608 | 2.71E-18    |
| FERMT2  | brown | 0.23639547  | 0.000188225 | 0.409468698 | 2.54E-11    |
| FGF2    | brown | 0.267658273 | 2.18E-05    | 0.356797154 | 9.11E-09    |
| FGFR3   | brown | 0.172473098 | 0.006807154 | 0.403071751 | 5.49E-11    |
| FOXO1   | brown | 0.36401055  | 4.33E-09    | 0.516529168 | 4.12E-18    |
| GATM    | brown | 0.275438922 | 1.22E-05    | 0.078948778 | 0.218193096 |
| GJA1    | brown | 0.23624904  | 0.000190013 | 0.259865898 | 3.83E-05    |
| GLIS3   | brown | 0.394035704 | 1.59E-10    | 0.582386611 | 1.20E-23    |
| GNA12   | brown | 0.399936441 | 7.96E-11    | 0.6408407   | 9.94E-30    |
| GPAM    | brown | 0.267301649 | 2.24E-05    | 0.399114592 | 8.77E-11    |
| GPNMB   | brown | 0.220537295 | 0.000506657 | 0.098371585 | 0.124633749 |
| GPR37L1 | brown | 0.265085608 | 2.63E-05    | 0.604946551 | 7.61E-26    |
| GPT2    | brown | 0.329170635 | 1.34E-07    | 0.617205406 | 4.08E-27    |
| GRAMD1C | brown | 0.293533297 | 2.95E-06    | 0.324210068 | 2.11E-07    |
| GSTM3   | brown | 0.351236589 | 1.60E-08    | 0.383428768 | 5.30E-10    |
| HDAC1   | brown | 0.293319958 | 3.00E-06    | 0.529364909 | 4.26E-19    |
| HEPACAM | brown | 0.29495639  | 2.63E-06    | 0.475110711 | 3.36E-15    |
| HEPH    | brown | 0.367057424 | 3.14E-09    | 0.411867767 | 1.89E-11    |
| HSPB8   | brown | 0.323172921 | 2.32E-07    | 0.453836397 | 7.51E-14    |
| ID4     | brown | 0.288733566 | 4.34E-06    | 0.293735449 | 2.90E-06    |
| IL17RB  | brown | 0.405507131 | 4.10E-11    | 0.492630478 | 2.20E-16    |
| INPPL1  | brown | 0.391984364 | 2.01E-10    | 0.71364826  | 1.94E-39    |
| ITGA6   | brown | 0.334157741 | 8.39E-08    | 0.33386744  | 8.63E-08    |
| ITGB5   | brown | 0.43736596  | 7.20E-13    | 0.681192763 | 9.22E-35    |
| ITGB8   | brown | 0.328578799 | 1.41E-07    | 0.206839258 | 0.001128847 |
| KAT2B   | brown | 0.334395756 | 8.21E-08    | 0.408318505 | 2.92E-11    |
| KCNJ10  | brown | 0.38172679  | 6.41E-10    | 0.565044482 | 4.56E-22    |
| KCNJ16  | brown | 0.313680357 | 5.39E-07    | 0.448380488 | 1.61E-13    |
| KLF15   | brown | 0.388559064 | 2.97E-10    | 0.547265365 | 1.53E-20    |
| LGALS3  | brown | 0.144604874 | 0.023588867 | 0.431677784 | 1.53E-12    |

|          |       |             |             |             |             |
|----------|-------|-------------|-------------|-------------|-------------|
| LIFR     | brown | 0.244987235 | 0.000106954 | 0.328665844 | 1.40E-07    |
| LRIG1    | brown | 0.296894948 | 2.24E-06    | 0.223384462 | 0.000426266 |
| MAPKAPK3 | brown | 0.281798442 | 7.49E-06    | 0.545407203 | 2.18E-20    |
| MAPRE1   | brown | 0.34466742  | 3.06E-08    | 0.411097546 | 2.08E-11    |
| MEGF10   | brown | 0.314614813 | 4.97E-07    | 0.359573636 | 6.86E-09    |
| MERTK    | brown | 0.312445851 | 6.01E-07    | 0.367823134 | 2.90E-09    |
| MFGE8    | brown | 0.272061169 | 1.57E-05    | 0.603976023 | 9.54E-26    |
| MSRB3    | brown | 0.43194226  | 1.48E-12    | 0.445530671 | 2.38E-13    |
| MYBPC1   | brown | 0.367270008 | 3.07E-09    | 0.632825749 | 8.11E-29    |
| MYO10    | brown | 0.252280902 | 6.51E-05    | 0.551426908 | 6.84E-21    |
| NHS      | brown | 0.295599003 | 2.49E-06    | 0.415617037 | 1.19E-11    |
| NPL      | brown | 0.317754897 | 3.76E-07    | 0.238639041 | 0.000162716 |
| OGFRL1   | brown | 0.304925892 | 1.15E-06    | 0.207528968 | 0.001085499 |
| P2RY14   | brown | 0.276141051 | 1.16E-05    | 0.168224782 | 0.008327411 |
| PALLD    | brown | 0.380076645 | 7.69E-10    | 0.481123078 | 1.34E-15    |
| PAPLN    | brown | 0.241108519 | 0.000138394 | 0.458229512 | 4.02E-14    |
| PAQR8    | brown | 0.306292284 | 1.02E-06    | 0.609802127 | 2.42E-26    |
| PDK4     | brown | 0.220067082 | 0.000521213 | 0.330610742 | 1.17E-07    |
| PHGDH    | brown | 0.379694507 | 8.03E-10    | 0.526629289 | 6.97E-19    |
| PLOD2    | brown | 0.322234158 | 2.52E-07    | 0.408097366 | 3.00E-11    |
| PLSCR4   | brown | 0.29608002  | 2.40E-06    | 0.305509375 | 1.09E-06    |
| PMP2     | brown | 0.185804742 | 0.003512794 | 0.140448235 | 0.027947238 |
| POU3F2   | brown | 0.35389231  | 1.22E-08    | 0.455597221 | 5.85E-14    |
| PPIC     | brown | 0.357492826 | 8.49E-09    | 0.271603454 | 1.63E-05    |
| PRDM16   | brown | 0.347670194 | 2.28E-08    | 0.477111358 | 2.48E-15    |
| PRDX6    | brown | 0.256162615 | 4.97E-05    | 0.410270375 | 2.30E-11    |
| PRKD1    | brown | 0.326236657 | 1.75E-07    | 0.37619989  | 1.18E-09    |
| PSAT1    | brown | 0.228004124 | 0.000320568 | 0.217904064 | 0.000593297 |
| PSD2     | brown | 0.488762271 | 4.07E-16    | 0.487957377 | 4.63E-16    |
| PTPN13   | brown | 0.324973941 | 1.97E-07    | 0.214413002 | 0.000729339 |
| PTTG1IP  | brown | 0.380070159 | 7.70E-10    | 0.561521338 | 9.30E-22    |
| QPRT     | brown | 0.359640348 | 6.81E-09    | 0.318114785 | 3.65E-07    |
| RAB30    | brown | 0.342889175 | 3.64E-08    | 0.364920229 | 3.93E-09    |
| RAB31    | brown | 0.387484828 | 3.36E-10    | 0.586101995 | 5.37E-24    |
| RAMP1    | brown | 0.358351845 | 7.77E-09    | 0.528598475 | 4.90E-19    |
| RANBP3L  | brown | 0.332131323 | 1.02E-07    | 0.365058145 | 3.88E-09    |
| RFTN2    | brown | 0.397086773 | 1.11E-10    | 0.518045006 | 3.17E-18    |
| RHOBTB3  | brown | 0.270860603 | 1.72E-05    | 0.365744374 | 3.61E-09    |
| RHOJ     | brown | 0.398852835 | 9.05E-11    | 0.58574687  | 5.81E-24    |
| RHPN2    | brown | 0.255287061 | 5.29E-05    | 0.392912147 | 1.81E-10    |

|          |       |             |             |             |             |
|----------|-------|-------------|-------------|-------------|-------------|
| RIN2     | brown | 0.411658245 | 1.94E-11    | 0.397427055 | 1.07E-10    |
| RXRA     | brown | 0.343519158 | 3.42E-08    | 0.600387879 | 2.19E-25    |
| RYR3     | brown | 0.178710918 | 0.005022551 | 0.352976881 | 1.34E-08    |
| SASH1    | brown | 0.405835456 | 3.94E-11    | 0.37039791  | 2.20E-09    |
| SCARA3   | brown | 0.306235981 | 1.03E-06    | 0.383642752 | 5.18E-10    |
| SFXN5    | brown | 0.198836418 | 0.001762072 | 0.431725576 | 1.52E-12    |
| SLC14A1  | brown | 0.238096259 | 0.000168573 | 0.195908709 | 0.002065273 |
| SLC25A18 | brown | 0.471786155 | 5.54E-15    | 0.609475801 | 2.62E-26    |
| SLC39A12 | brown | 0.310336979 | 7.21E-07    | 0.142765475 | 0.025439404 |
| SLC40A1  | brown | 0.253256857 | 6.09E-05    | 0.227626352 | 0.000328197 |
| SLC44A2  | brown | 0.302217142 | 1.44E-06    | 0.619637306 | 2.25E-27    |
| SLC9A9   | brown | 0.245743783 | 0.000101661 | 0.342484263 | 3.79E-08    |
| SNAP23   | brown | 0.313472981 | 5.49E-07    | 0.466473097 | 1.22E-14    |
| SNX5     | brown | 0.340379988 | 4.64E-08    | 0.282242377 | 7.23E-06    |
| SOX2     | brown | 0.153587965 | 0.016126921 | 0.344133408 | 3.22E-08    |
| SOX9     | brown | 0.303599195 | 1.28E-06    | 0.413285684 | 1.59E-11    |
| SPPL2A   | brown | 0.234265564 | 0.000215855 | 0.187278302 | 0.003256199 |
| SPR      | brown | 0.304092188 | 1.23E-06    | 0.302075326 | 1.46E-06    |
| SSPN     | brown | 0.237763682 | 0.000172258 | 0.233093759 | 0.000232627 |
| STK3     | brown | 0.237505829 | 0.000175167 | 0.325175114 | 1.93E-07    |
| SYT17    | brown | 0.187897509 | 0.003153534 | 0.251737591 | 6.76E-05    |
| TBL1X    | brown | 0.393371677 | 1.71E-10    | 0.684260374 | 3.54E-35    |
| TCF12    | brown | 0.397686858 | 1.04E-10    | 0.405962914 | 3.88E-11    |
| TFAP2C   | brown | 0.330987945 | 1.13E-07    | 0.424521117 | 3.87E-12    |
| TGIF2    | brown | 0.287818218 | 4.67E-06    | 0.301406119 | 1.54E-06    |
| TMED1    | brown | 0.249413947 | 7.93E-05    | 0.404019444 | 4.90E-11    |
| TMEM123  | brown | 0.269076042 | 1.96E-05    | 0.203592957 | 0.001355038 |
| TMEM47   | brown | 0.249890889 | 7.68E-05    | 0.383460813 | 5.28E-10    |
| TNS3     | brown | 0.409488461 | 2.53E-11    | 0.499742314 | 6.96E-17    |
| TPD52L1  | brown | 0.312457883 | 6.00E-07    | 0.281097329 | 7.90E-06    |
| TRIM8    | brown | 0.325935538 | 1.80E-07    | 0.297134348 | 2.20E-06    |
| TST      | brown | 0.162587275 | 0.010807544 | 0.398117002 | 9.86E-11    |
| TXNIP    | brown | 0.249912981 | 7.66E-05    | 0.463866506 | 1.78E-14    |
| UNG      | brown | 0.296247598 | 2.36E-06    | 0.474242513 | 3.83E-15    |
| VCAN     | brown | 0.405465129 | 4.12E-11    | 0.610959915 | 1.84E-26    |
| WFS1     | brown | 0.307804363 | 8.97E-07    | 0.613969174 | 8.94E-27    |
| WWC1     | brown | 0.312790312 | 5.83E-07    | 0.55502571  | 3.38E-21    |
| YAP1     | brown | 0.310963197 | 6.83E-07    | 0.401929357 | 6.29E-11    |
| YES1     | brown | 0.350813775 | 1.67E-08    | 0.55470638  | 3.60E-21    |
| ZFP36L1  | brown | 0.290957112 | 3.63E-06    | 0.436421802 | 8.17E-13    |



|          |       |              |             |              |             |
|----------|-------|--------------|-------------|--------------|-------------|
| ZNF217   | brown | 0.350714046  | 1.68E-08    | 0.310232236  | 7.28E-07    |
| ZNHIT6   | brown | 0.302679693  | 1.38E-06    | 0.246790844  | 9.47E-05    |
| ABCA8    | green | 0.175062085  | 0.006007166 | 0.132227805  | 0.038621424 |
| ACSL1    | green | 0.234296448  | 0.000215429 | 0.253569308  | 5.96E-05    |
| ADA      | green | 0.27914128   | 9.19E-06    | 0.339699912  | 4.95E-08    |
| ADARB2   | green | 0.222612786  | 0.000446797 | 0.356863403  | 9.05E-09    |
| ADIPOR2  | green | 0.432345296  | 1.40E-12    | 0.51786204   | 3.27E-18    |
| AIF1L    | green | 0.185731824  | 0.003525954 | 0.467247587  | 1.09E-14    |
| ANLN     | green | 0.357410956  | 8.56E-09    | 0.353674397  | 1.25E-08    |
| ANP32B   | green | 0.256947697  | 4.70E-05    | 0.499042814  | 7.81E-17    |
| ARHGAP17 | green | 0.381354548  | 6.68E-10    | 0.630083438  | 1.64E-28    |
| ARHGAP22 | green | 0.297798543  | 2.08E-06    | 0.382122766  | 6.13E-10    |
| ARHGEF10 | green | 0.356852158  | 9.06E-09    | 0.584818714  | 7.11E-24    |
| AZGP1    | green | 0.315634159  | 4.54E-07    | 0.2214329    | 0.000479969 |
| BCAS1    | green | 0.213375355  | 0.000775011 | 0.41510059   | 1.27E-11    |
| BTN2A1   | green | -0.180527808 | 0.004588558 | -0.246840553 | 9.44E-05    |
| C1orf198 | green | 0.248618264  | 8.37E-05    | 0.359159648  | 7.16E-09    |
| C21orf91 | green | 0.158063696  | 0.013248197 | 0.126470999  | 0.047995578 |
| CAPN3    | green | 0.158690649  | 0.012883339 | 0.169174122  | 0.007963679 |
| CCDC88A  | green | 0.13951868   | 0.029011212 | 0.214681835  | 0.000717918 |
| CLCA4    | green | 0.264818319  | 2.68E-05    | 0.142475654  | 0.025742079 |
| CLDN11   | green | 0.120851885  | 0.058907086 | 0.128081309  | 0.045199478 |
| CNKSR3   | green | 0.369544162  | 2.41E-09    | 0.481386322  | 1.29E-15    |
| COL4A5   | green | 0.197145665  | 0.001931795 | 0.205407307  | 0.001223964 |
| CRTC3    | green | 0.242706362  | 0.000124518 | 0.550143619  | 8.77E-21    |
| CTNNA3   | green | 0.225669646  | 0.000370487 | 0.135578839  | 0.033913796 |
| CYP27A1  | green | 0.279272843  | 9.10E-06    | 0.358609404  | 7.57E-09    |
| DAAM2    | green | 0.2018533    | 0.001492681 | 0.332277892  | 1.00E-07    |
| EFHD1    | green | 0.309205101  | 7.95E-07    | 0.28364378   | 6.48E-06    |
| EPN2     | green | 0.252135225  | 6.58E-05    | 0.537923148  | 8.89E-20    |
| ERBB3    | green | 0.25379371   | 5.87E-05    | 0.373576948  | 1.57E-09    |
| FAM107B  | green | 0.333555389  | 8.88E-08    | 0.578563256  | 2.73E-23    |
| FGF1     | green | 0.200340591  | 0.00162265  | 0.14485859   | 0.023342956 |
| FLNC     | green | 0.243751946  | 0.000116155 | 0.448789263  | 1.52E-13    |
| FMNL2    | green | 0.352390289  | 1.42E-08    | 0.363757742  | 4.44E-09    |
| GAB1     | green | 0.227573999  | 0.000329267 | 0.1647253    | 0.009799057 |
| GAB2     | green | 0.192200858  | 0.002517313 | 0.326127387  | 1.77E-07    |
| GLTP     | green | 0.307237344  | 9.41E-07    | 0.494661409  | 1.59E-16    |
| GPIHBP1  | green | 0.155235247  | 0.015009424 | 0.36449359   | 4.11E-09    |
| GPRC5B   | green | 0.321116225  | 2.79E-07    | 0.538787649  | 7.57E-20    |

|         |       |             |             |             |             |
|---------|-------|-------------|-------------|-------------|-------------|
| HHATL   | green | 0.240521824 | 0.000143843 | 0.467388875 | 1.06E-14    |
| HIP1    | green | 0.305130156 | 1.13E-06    | 0.205417522 | 0.00122326  |
| HIP1R   | green | 0.207461914 | 0.001089646 | 0.330044961 | 1.23E-07    |
| HSPA2   | green | 0.217821654 | 0.000596218 | 0.248808169 | 8.26E-05    |
| KIF13B  | green | 0.282288384 | 7.21E-06    | 0.287874799 | 4.64E-06    |
| LAMP2   | green | 0.214162182 | 0.000740145 | 0.311121498 | 6.74E-07    |
| LHPP    | green | 0.263423732 | 2.96E-05    | 0.564277455 | 5.33E-22    |
| LLGL1   | green | 0.262423138 | 3.19E-05    | 0.64415556  | 4.10E-30    |
| LPAR1   | green | 0.229220543 | 0.000297108 | 0.387200719 | 3.47E-10    |
| LRRC1   | green | 0.436282342 | 8.32E-13    | 0.470092325 | 7.13E-15    |
| MAP4K4  | green | 0.34538308  | 2.85E-08    | 0.438646251 | 6.07E-13    |
| MAP4K5  | green | 0.286255635 | 5.28E-06    | 0.434508028 | 1.05E-12    |
| MYLIP   | green | 0.171404498 | 0.00716419  | 0.222405248 | 0.000452473 |
| MYO9B   | green | 0.330244603 | 1.21E-07    | 0.539337899 | 6.83E-20    |
| NASP    | green | 0.27191695  | 1.59E-05    | 0.478611819 | 1.97E-15    |
| NDRG1   | green | 0.257564525 | 4.50E-05    | 0.449394471 | 1.40E-13    |
| NEK7    | green | 0.356746933 | 9.16E-09    | 0.110268254 | 0.084996964 |
| NKX2-2  | green | 0.294272172 | 2.78E-06    | 0.557853151 | 1.93E-21    |
| NKX6-2  | green | 0.128040162 | 0.045269186 | 0.213958208 | 0.000749041 |
| P2RX7   | green | 0.319358294 | 3.26E-07    | 0.382435903 | 5.92E-10    |
| PAQR6   | green | 0.077350832 | 0.227683147 | 0.349327418 | 1.93E-08    |
| PHLDB1  | green | 0.22432953  | 0.000402314 | 0.435370352 | 9.40E-13    |
| PKP4    | green | 0.144451887 | 0.023738225 | 0.281399764 | 7.72E-06    |
| PLP1    | green | 0.123142395 | 0.054234526 | 0.173970511 | 0.006333585 |
| PLXDC2  | green | 0.387560387 | 3.33E-10    | 0.417078679 | 9.92E-12    |
| PLXNB1  | green | 0.510720779 | 1.12E-17    | 0.605332015 | 6.95E-26    |
| PPFIBP2 | green | 0.34011662  | 4.76E-08    | 0.617298893 | 3.99E-27    |
| PTP4A2  | green | 0.252766486 | 6.30E-05    | 0.577579736 | 3.37E-23    |
| RAPGEF3 | green | 0.433737738 | 1.17E-12    | 0.643768454 | 4.55E-30    |
| RASGRP3 | green | 0.238459608 | 0.000164631 | 0.311850575 | 6.32E-07    |
| RASSF2  | green | 0.201767913 | 0.001499756 | 0.558022366 | 1.87E-21    |
| RHOU    | green | 0.258688019 | 4.16E-05    | 0.336663269 | 6.62E-08    |
| RRBP1   | green | 0.302368706 | 1.42E-06    | 0.588607651 | 3.10E-24    |
| RTKN    | green | 0.212704306 | 0.000805936 | 0.476977995 | 2.53E-15    |
| S1PR5   | green | 0.179091528 | 0.004928696 | 0.163515165 | 0.01035912  |
| SH3BP4  | green | 0.339641069 | 4.98E-08    | 0.348609038 | 2.08E-08    |
| SLAIN1  | green | 0.158914351 | 0.01275531  | 0.326864969 | 1.65E-07    |
| SLC44A1 | green | 0.249511897 | 7.88E-05    | 0.245470436 | 0.000103544 |
| SLC5A11 | green | 0.269138486 | 1.95E-05    | 0.32853013  | 1.42E-07    |
| SLC6A9  | green | 0.38457896  | 4.66E-10    | 0.402974081 | 5.55E-11    |

|          |       |              |             |              |             |
|----------|-------|--------------|-------------|--------------|-------------|
| SLCO1A2  | green | 0.225496988  | 0.000374452 | 0.053402294  | 0.40529753  |
| SNX6     | green | 0.215306254  | 0.000692026 | 0.584782333  | 7.16E-24    |
| SOX8     | green | 0.186759233  | 0.003344583 | 0.506911706  | 2.12E-17    |
| SREBF1   | green | 0.321259108  | 2.75E-07    | 0.264052904  | 2.83E-05    |
| ST18     | green | 0.182747107  | 0.004104402 | 0.142585968  | 0.02562651  |
| TF       | green | 0.155065425  | 0.015121407 | 0.106684176  | 0.095695534 |
| TGFB3    | green | 0.188030347  | 0.003131895 | 0.456085463  | 5.46E-14    |
| THBS2    | green | 0.282181683  | 7.27E-06    | 0.227194999  | 0.000337114 |
| TJAP1    | green | 0.246274591  | 9.81E-05    | 0.604206691  | 9.04E-26    |
| TMC6     | green | 0.361922013  | 5.38E-09    | 0.439901439  | 5.13E-13    |
| TMCC3    | green | 0.283009514  | 6.81E-06    | 0.259127042  | 4.03E-05    |
| TRIM59   | green | 0.293460119  | 2.97E-06    | 0.318770656  | 3.44E-07    |
| UGT8     | green | 0.204940909  | 0.001256498 | 0.067056618  | 0.295832825 |
| VAMP3    | green | 0.337686711  | 6.01E-08    | 0.439615364  | 5.33E-13    |
| VEZF1    | green | 0.434923132  | 9.97E-13    | 0.566986115  | 3.07E-22    |
| VRK2     | green | 0.260032405  | 3.78E-05    | 0.289437425  | 4.10E-06    |
| WSB1     | green | 0.176695068  | 0.005546935 | 0.333797013  | 8.68E-08    |
| ZCCHC24  | green | 0.370341716  | 2.22E-09    | 0.624602252  | 6.56E-28    |
| ZEB2     | green | 0.134064201  | 0.035977509 | 0.260886987  | 3.56E-05    |
| ZNF565   | green | 0.361270018  | 5.75E-09    | 0.570600374  | 1.46E-22    |
| ABI3BP   | grey  | 0.188784591  | 0.00301156  | 0.121674458  | 0.057192228 |
| ADAMTS9  | grey  | 0.240070715  | 0.000148169 | 0.1862151    | 0.00343956  |
| AKR1C2   | grey  | 0.35823165   | 7.87E-09    | 0.312777342  | 5.83E-07    |
| ALDH1A1  | grey  | -0.212163013 | 0.000831707 | 0.043843079  | 0.494561506 |
| ALMS1    | grey  | 0.254137011  | 5.73E-05    | 0.229689058  | 0.000288507 |
| ANKDD1A  | grey  | 0.19258483   | 0.002466642 | 0.350197394  | 1.77E-08    |
| ANKRD36B | grey  | 0.223855162  | 0.000414176 | 0.413575205  | 1.53E-11    |
| ARMC3    | grey  | 0.269623701  | 1.88E-05    | 0.139163687  | 0.029426586 |
| ARMCX4   | grey  | -0.171877227 | 0.007004233 | -0.211489094 | 0.000864854 |
| ATF4     | grey  | 0.160425762  | 0.011919248 | 0.198512493  | 0.001793494 |
| C19orf18 | grey  | 0.208121696  | 0.001049476 | 0.251631432  | 6.81E-05    |
| CASP6    | grey  | 0.19218725   | 0.002519126 | 0.23026744   | 0.000278208 |
| CCL2     | grey  | 0.242011992  | 0.00013038  | 0.034453926  | 0.591481301 |
| CD109    | grey  | 0.286626995  | 5.13E-06    | 0.072726598  | 0.256781098 |
| CEP70    | grey  | 0.223180222  | 0.000431613 | 0.25436446   | 5.64E-05    |
| COL11A1  | grey  | 0.270224064  | 1.80E-05    | 0.32834861   | 1.44E-07    |
| CTBS     | grey  | 0.272511381  | 1.52E-05    | 0.273410685  | 1.42E-05    |
| CTSZ     | grey  | 0.139491087  | 0.029043318 | 0.238731247  | 0.00016174  |
| CX3CR1   | grey  | -0.0527003   | 0.411508153 | -0.323111991 | 2.33E-07    |
| CXCL2    | grey  | 0.19648318   | 0.002002271 | 0.099448276  | 0.120542126 |

|          |      |              |             |              |             |
|----------|------|--------------|-------------|--------------|-------------|
| CXCR4    | grey | 0.152202502  | 0.017122398 | 0.073202275  | 0.253674705 |
| DSP      | grey | 0.153096415  | 0.016474164 | 0.071894652  | 0.262276975 |
| EDNRA    | grey | 0.315877434  | 4.45E-07    | 0.200582634  | 0.001601182 |
| FAM114A1 | grey | 0.281632058  | 7.58E-06    | 0.013453975  | 0.834041901 |
| FN1      | grey | 0.268072804  | 2.11E-05    | 0.043692647  | 0.49604502  |
| FOS      | grey | 0.26631784   | 2.40E-05    | 0.045254927  | 0.480753954 |
| FOSB     | grey | -0.088122113 | 0.169146466 | 0.084891718  | 0.185382826 |
| FUBP3    | grey | 0.094605963  | 0.139794088 | -0.075182789 | 0.241020984 |
| GADD45B  | grey | 0.243639033  | 0.000117032 | 0.127555146  | 0.046097686 |
| HIBCH    | grey | 0.175599084  | 0.005852182 | 0.333947201  | 8.56E-08    |
| IGFBP5   | grey | 0.256954601  | 4.70E-05    | 0.042801456  | 0.504881833 |
| ITGB2    | grey | 0.261333935  | 3.45E-05    | 0.113662256  | 0.075773088 |
| KCTD18   | grey | 0.15106487   | 0.01797945  | 0.037130646  | 0.56298476  |
| MDK      | grey | -0.261082393 | 3.51E-05    | -0.127707707 | 0.045835725 |
| MPL      | grey | -0.088594285 | 0.16686494  | -0.122309961 | 0.0558958   |
| NEDD1    | grey | 0.225367323  | 0.000377456 | 0.037596168  | 0.558096808 |
| NKX6-3   | grey | 0.206442149  | 0.00115452  | 0.036100008  | 0.573878859 |
| OSMR     | grey | 0.260030172  | 3.78E-05    | 0.063667851  | 0.320968146 |
| PART1    | grey | -0.204183004 | 0.001311063 | -0.013933781 | 0.828213542 |
| PAWR     | grey | 0.264762187  | 2.69E-05    | 0.161922126  | 0.011139462 |
| PCDH18   | grey | 0.338143246  | 5.75E-08    | 0.205108898  | 0.001244689 |
| PDLIM1   | grey | 0.156481931  | 0.014209338 | 0.060711793  | 0.343993924 |
| PFKFB3   | grey | 0.326883921  | 1.65E-07    | 0.08987288   | 0.160802269 |
| PIPOX    | grey | 0.211580369  | 0.000860295 | 0.077546312  | 0.226506768 |
| RAB20    | grey | 0.231410268  | 0.000258858 | 0.05405775   | 0.399549203 |
| RAB3B    | grey | -0.219913602 | 0.000526048 | -0.214524774 | 0.00072457  |
| RBMS3    | grey | 0.265676577  | 2.52E-05    | 0.081454852  | 0.20388446  |
| RBPMS    | grey | 0.14044465   | 0.027951276 | 0.075987026  | 0.236010904 |
| RGS1     | grey | 0.301947863  | 1.47E-06    | 0.067824204  | 0.290326497 |
| RHOD     | grey | 0.136280995  | 0.032991758 | 0.074718608  | 0.243946292 |
| RPH3A    | grey | -0.345136595 | 2.92E-08    | 0.167230822  | 0.008723996 |
| SCIN     | grey | 0.335896774  | 7.12E-08    | 0.139944859  | 0.028519179 |
| SDR16C5  | grey | -0.242494452 | 0.00012628  | -0.022662528 | 0.724121483 |
| SEZ6     | grey | -0.312534681 | 5.96E-07    | 0.00873783   | 0.891764499 |
| SGPP2    | grey | -0.066503051 | 0.29984671  | 0.044046248  | 0.492561668 |
| SLC16A1  | grey | 0.191506957  | 0.002611289 | 0.030917004  | 0.630112889 |
| SLIT3    | grey | -0.217139466 | 0.00062091  | -0.136458926 | 0.032761524 |
| SPP1     | grey | 0.26880353   | 2.00E-05    | 0.089648083  | 0.161856025 |
| ST3GAL1  | grey | 0.252231495  | 6.54E-05    | 0.304953682  | 1.14E-06    |
| SYS1     | grey | 0.3130067    | 5.72E-07    | 0.207258083  | 0.001102338 |

|         |      |              |             |              |             |
|---------|------|--------------|-------------|--------------|-------------|
| TCEA3   | grey | 0.230023909  | 0.000282502 | 0.305621498  | 1.08E-06    |
| TFEB    | grey | 0.194288339  | 0.00225284  | 0.084374318  | 0.188086352 |
| TFG     | grey | -0.24795579  | 8.76E-05    | -0.260725391 | 3.60E-05    |
| TGFBI   | grey | 0.303724576  | 1.27E-06    | 0.151804262  | 0.017418277 |
| TRIM22  | grey | 0.288773735  | 4.32E-06    | -0.017402898 | 0.786371112 |
| TRMT5   | grey | -0.362180516 | 5.24E-09    | -0.423452574 | 4.43E-12    |
| USP46   | grey | 0.333364941  | 9.04E-08    | 0.195595373  | 0.002100393 |
| ZBBX    | grey | -0.232504597 | 0.000241511 | -0.105626436 | 0.099049847 |
| ZC3H7B  | grey | 0.138534614  | 0.03017515  | 0.099708151  | 0.119570383 |
| ABCC8   | red  | -0.238065231 | 0.000168913 | 0.157986146  | 0.013293953 |
| AK5     | red  | -0.218471911 | 0.00057353  | -0.422145436 | 5.24E-12    |
| ANO3    | red  | -0.321996948 | 2.58E-07    | -0.307501018 | 9.20E-07    |
| AP2S1   | red  | -0.305357277 | 1.10E-06    | -0.24943361  | 7.92E-05    |
| AP3M2   | red  | -0.289192257 | 4.18E-06    | -0.356815938 | 9.10E-09    |
| CAMKV   | red  | -0.245841028 | 0.000100998 | -0.306130419 | 1.03E-06    |
| CBLN2   | red  | -0.175758521 | 0.005806861 | -0.383842198 | 5.06E-10    |
| CCK     | red  | -0.172908387 | 0.006666332 | -0.366581502 | 3.30E-09    |
| CD200   | red  | -0.160230935 | 0.012024236 | 0.011585169  | 0.856826564 |
| CHGA    | red  | -0.107331888 | 0.093686535 | -0.15044569  | 0.01846143  |
| CHN1    | red  | -0.38696693  | 3.56E-10    | -0.540601646 | 5.40E-20    |
| CLIP3   | red  | -0.449205011 | 1.44E-13    | -0.139018656 | 0.029597742 |
| DGKB    | red  | -0.287270001 | 4.87E-06    | -0.32773197  | 1.53E-07    |
| DLGAP2  | red  | -0.235235414 | 0.000202835 | -0.188500773 | 0.003056341 |
| DNAJC5G | red  | -0.227204366 | 0.000336918 | -0.183003901 | 0.004051464 |
| DPF3    | red  | 0.064609488  | 0.313848603 | 0.241152919  | 0.00013799  |
| EGR3    | red  | -0.238067181 | 0.000168892 | -0.28656436  | 5.15E-06    |
| FAM81A  | red  | -0.211350667 | 0.000871812 | -0.167581994 | 0.008582004 |
| FIBP    | red  | -0.352684392 | 1.38E-08    | -0.184855873 | 0.00368756  |
| GDA     | red  | -0.213252144 | 0.000780605 | -0.205873183 | 0.001192239 |
| GFRA2   | red  | -0.229898903 | 0.00028473  | 0.023812503  | 0.710733544 |
| GPD1L   | red  | -0.223210955 | 0.000430804 | -0.148942914 | 0.019678206 |
| HECW1   | red  | -0.18516076  | 0.003630567 | -0.178939254 | 0.004966054 |
| HHAT    | red  | 0.299413318  | 1.82E-06    | 0.148895732  | 0.01971751  |
| KALRN   | red  | -0.207069049 | 0.001114231 | -0.266255649 | 2.41E-05    |
| KCNC2   | red  | -0.193927702 | 0.002296641 | -0.320950897 | 2.83E-07    |
| KCNF1   | red  | -0.357272338 | 8.68E-09    | -0.227224762 | 0.000336492 |
| KCNS1   | red  | -0.098866441 | 0.122740032 | 0.102898765  | 0.108130913 |
| KCNS2   | red  | -0.194972044 | 0.002171882 | -0.168052313 | 0.008395054 |
| KHDRBS3 | red  | -0.180368266 | 0.004625268 | -0.142280294 | 0.025947846 |
| LDB2    | red  | -0.341958029 | 3.98E-08    | -0.500768384 | 5.88E-17    |

|          |           |              |             |              |             |
|----------|-----------|--------------|-------------|--------------|-------------|
| LMO4     | red       | -0.215710222 | 0.000675738 | -0.140868382 | 0.027477414 |
| LMTK2    | red       | -0.265051973 | 2.63E-05    | -0.241319785 | 0.00013648  |
| LRRC4C   | red       | -0.122957163 | 0.054600606 | -0.32176405  | 2.63E-07    |
| MEF2C    | red       | -0.148116461 | 0.020376586 | -0.277402701 | 1.05E-05    |
| MOXD1    | red       | -0.073545142 | 0.251451813 | -0.091842273 | 0.151789821 |
| MTX2     | red       | -0.324445549 | 2.06E-07    | -0.435299546 | 9.49E-13    |
| NCALD    | red       | -0.360212124 | 6.42E-09    | -0.385761076 | 4.08E-10    |
| NEFL     | red       | -0.156092171 | 0.014455359 | 0.025651974  | 0.689503254 |
| NME5     | red       | -0.244954787 | 0.000107186 | -0.32479899  | 2.00E-07    |
| PDK3     | red       | -0.199693756 | 0.00168132  | -0.12367952  | 0.053184488 |
| PFDN4    | red       | -0.280557436 | 8.24E-06    | -0.257529159 | 4.52E-05    |
| PLCB1    | red       | -0.417819619 | 9.04E-12    | -0.29670023  | 2.28E-06    |
| PNMA3    | red       | -0.311220912 | 6.68E-07    | -0.144312796 | 0.023874723 |
| POPDC3   | red       | -0.177197808 | 0.005411754 | -0.097565924 | 0.127765204 |
| PPP2R2C  | red       | -0.396631675 | 1.17E-10    | -0.269587564 | 1.89E-05    |
| RAB27B   | red       | -0.122522143 | 0.055468403 | -0.03080879  | 0.631311583 |
| RAB3C    | red       | -0.200607657 | 0.001598977 | -0.160020181 | 0.012138722 |
| RASL10A  | red       | -0.178974423 | 0.004957403 | -0.19598029  | 0.002057325 |
| RIMS3    | red       | -0.141833979 | 0.026423245 | -0.191804636 | 0.00257059  |
| RPRML    | red       | -0.314171458 | 5.16E-07    | -0.186430661 | 0.003401646 |
| SERPINF1 | red       | -0.170903924 | 0.007337113 | -0.218569804 | 0.000570184 |
| SH3BGRL2 | red       | -0.188191749 | 0.003105784 | -0.18653969  | 0.003382614 |
| SH3KBP1  | red       | -0.112852203 | 0.077897281 | -0.156995089 | 0.01389103  |
| SHANK2   | red       | -0.260169665 | 3.74E-05    | -0.190769354 | 0.002714668 |
| SLC17A6  | red       | -0.254879577 | 5.44E-05    | -0.315341692 | 4.66E-07    |
| SLC30A3  | red       | -0.388132377 | 3.12E-10    | -0.343962889 | 3.28E-08    |
| SLIT2    | red       | -0.084876468 | 0.185462099 | -0.124960843 | 0.050747606 |
| SMAD1    | red       | 0.194460433  | 0.002232208 | -0.02021676  | 0.752870814 |
| SORCS1   | red       | -0.164862137 | 0.009737447 | 0.023236017  | 0.717434183 |
| TBR1     | red       | -0.214285787 | 0.000734801 | -0.479643287 | 1.69E-15    |
| TMEM130  | red       | -0.325293255 | 1.91E-07    | -0.496844007 | 1.12E-16    |
| TMEM158  | red       | -0.255437211 | 5.23E-05    | -0.171716259 | 0.007058338 |
| VIPR1    | red       | -0.294980112 | 2.62E-06    | -0.00160906  | 0.980009513 |
| VSTM2A   | red       | -0.061200787 | 0.340114324 | -0.195368712 | 0.002126137 |
| WNT10B   | red       | -0.200647324 | 0.001595488 | -0.198974168 | 0.001748863 |
| ZIC1     | red       | 0.052593738  | 0.412455801 | 0.050766592  | 0.428903522 |
| AASDHPPT | turquoise | -0.338092574 | 5.78E-08    | -0.584121032 | 8.27E-24    |
| ABCA5    | turquoise | -0.247808879 | 8.84E-05    | -0.321552591 | 2.68E-07    |
| ABCC12   | turquoise | -0.221884344 | 0.000467016 | -0.297377455 | 2.15E-06    |
| ABCE1    | turquoise | -0.26405095  | 2.83E-05    | -0.543083707 | 3.38E-20    |

|         |           |              |             |              |             |
|---------|-----------|--------------|-------------|--------------|-------------|
| ACOT7   | turquoise | -0.318730504 | 3.45E-07    | -0.339091596 | 5.25E-08    |
| ACP1    | turquoise | -0.313504765 | 5.47E-07    | -0.80046816  | 6.10E-56    |
| ACSF2   | turquoise | 0.365618901  | 3.66E-09    | 0.455118305  | 6.26E-14    |
| ACSL3   | turquoise | -0.310694437 | 6.99E-07    | -0.593972049 | 9.39E-25    |
| ACSL4   | turquoise | -0.315327663 | 4.67E-07    | -0.651751629 | 5.15E-31    |
| ACTA2   | turquoise | 0.251158804  | 7.04E-05    | 0.168135474  | 0.008362377 |
| ACTL6B  | turquoise | -0.165809873 | 0.009320069 | -0.228731487 | 0.000306341 |
| ACTN2   | turquoise | -0.266782801 | 2.32E-05    | -0.43964261  | 5.31E-13    |
| ACTR10  | turquoise | -0.36131635  | 5.73E-09    | -0.764624671 | 2.89E-48    |
| ACTR2   | turquoise | -0.210168024 | 0.000933389 | -0.529950352 | 3.84E-19    |
| ACTR6   | turquoise | -0.355298662 | 1.06E-08    | -0.424490576 | 3.88E-12    |
| ACYP2   | turquoise | -0.231084677 | 0.000264239 | -0.619089838 | 2.57E-27    |
| ADAM23  | turquoise | -0.295881921 | 2.43E-06    | -0.441782723 | 3.98E-13    |
| ADAMTS1 | turquoise | 0.393907784  | 1.61E-10    | 0.261743969  | 3.35E-05    |
| ADARB1  | turquoise | -0.279636338 | 8.85E-06    | -0.279847612 | 8.70E-06    |
| ADCY1   | turquoise | -0.356131114 | 9.75E-09    | -0.706090905 | 2.72E-38    |
| ADCY4   | turquoise | 0.196908913  | 0.001956717 | 0.399866556  | 8.03E-11    |
| ADCY7   | turquoise | 0.22720159   | 0.000336976 | 0.281125561  | 7.89E-06    |
| ADCYAP1 | turquoise | -0.427499173 | 2.64E-12    | -0.347533568 | 2.31E-08    |
| ADORA2A | turquoise | 0.291123356  | 3.58E-06    | 0.488706501  | 4.11E-16    |
| AEBP1   | turquoise | 0.472094983  | 5.29E-15    | 0.346148978  | 2.65E-08    |
| AFF1    | turquoise | 0.378011561  | 9.66E-10    | 0.266350169  | 2.40E-05    |
| AFF2    | turquoise | -0.277581625 | 1.04E-05    | -0.398040962 | 9.95E-11    |
| AFF3    | turquoise | -0.196818586 | 0.001966302 | -0.177151126 | 0.005424181 |
| AFTPH   | turquoise | -0.117536204 | 0.066254875 | -0.553243106 | 4.80E-21    |
| AGFG2   | turquoise | 0.294678602  | 2.69E-06    | 0.347415647  | 2.34E-08    |
| AGK     | turquoise | -0.333944423 | 8.56E-08    | -0.669968606 | 2.78E-33    |
| AHI1    | turquoise | -0.237607334 | 0.000174016 | -0.276538779 | 1.12E-05    |
| AIFM3   | turquoise | 0.379156192  | 8.52E-10    | 0.345649652  | 2.78E-08    |
| AIG1    | turquoise | -0.341687497 | 4.09E-08    | -0.537807773 | 9.09E-20    |
| AKAP11  | turquoise | -0.384107466 | 4.91E-10    | -0.681680405 | 7.92E-35    |
| AKAP6   | turquoise | -0.274178627 | 1.34E-05    | -0.459935093 | 3.15E-14    |
| AKAP8L  | turquoise | 0.169250364  | 0.00793509  | 0.278829643  | 9.41E-06    |
| AKIRIN2 | turquoise | -0.282367766 | 7.16E-06    | -0.723677642 | 5.12E-41    |
| ALDH1L1 | turquoise | 0.201141442  | 0.001552606 | 0.364278671  | 4.21E-09    |
| ALDH5A1 | turquoise | -0.295447608 | 2.52E-06    | -0.486033194 | 6.26E-16    |
| AMN1    | turquoise | -0.265487827 | 2.55E-05    | -0.364884853 | 3.95E-09    |
| AMPH    | turquoise | -0.217717223 | 0.000599938 | -0.609144891 | 2.83E-26    |
| ANAPC10 | turquoise | -0.236524804 | 0.000186658 | -0.391766171 | 2.06E-10    |
| ANAPC13 | turquoise | -0.219662563 | 0.000534045 | -0.495483975 | 1.39E-16    |

|          |           |              |             |              |             |
|----------|-----------|--------------|-------------|--------------|-------------|
| ANGPT1   | turquoise | 0.294727692  | 2.68E-06    | 0.309623332  | 7.67E-07    |
| ANGPT2   | turquoise | 0.317637659  | 3.80E-07    | 0.344204009  | 3.20E-08    |
| ANGPTL4  | turquoise | 0.15457665   | 0.015447804 | 0.381171653  | 6.82E-10    |
| ANKMY2   | turquoise | -0.208771344 | 0.001011257 | -0.58631041  | 5.13E-24    |
| ANKRD13D | turquoise | 0.087650833  | 0.171446789 | 0.593707314  | 9.97E-25    |
| ANKRD18A | turquoise | 0.309742339  | 7.59E-07    | 0.532109576  | 2.59E-19    |
| ANKRD40  | turquoise | 0.231124366  | 0.000263578 | 0.372893189  | 1.69E-09    |
| ANKRD46  | turquoise | -0.291215562 | 3.56E-06    | -0.641917212 | 7.46E-30    |
| ANKRD9   | turquoise | 0.206063359  | 0.001179508 | 0.29205853   | 3.32E-06    |
| ANXA2    | turquoise | 0.337396967  | 6.17E-08    | 0.324362734  | 2.08E-07    |
| ANXA6    | turquoise | -0.296638408 | 2.29E-06    | -0.340186066 | 4.73E-08    |
| AP3S1    | turquoise | -0.258420805 | 4.24E-05    | -0.707545724 | 1.65E-38    |
| APBA2    | turquoise | -0.231337207 | 0.000260057 | -0.392709884 | 1.85E-10    |
| APLNR    | turquoise | 0.41559869   | 1.19E-11    | 0.277117101  | 1.07E-05    |
| APOC1    | turquoise | 0.293826533  | 2.88E-06    | 0.291444684  | 3.49E-06    |
| APOL3    | turquoise | 0.194269224  | 0.002255142 | 0.384607347  | 4.65E-10    |
| APOLD1   | turquoise | 0.393741562  | 1.64E-10    | 0.229620605  | 0.000289749 |
| APOO     | turquoise | -0.259901967 | 3.82E-05    | -0.7212559   | 1.25E-40    |
| AQP1     | turquoise | 0.220864226  | 0.00049676  | 0.136058246  | 0.033281924 |
| ARAP1    | turquoise | 0.266683934  | 2.34E-05    | 0.434910746  | 9.99E-13    |
| ARAP3    | turquoise | 0.212079152  | 0.000835767 | 0.511666915  | 9.50E-18    |
| ARF1     | turquoise | -0.243915829 | 0.000114893 | -0.334986026 | 7.76E-08    |
| ARHGAP20 | turquoise | -0.354703141 | 1.13E-08    | -0.58491046  | 6.97E-24    |
| ARHGAP4  | turquoise | 0.297496452  | 2.13E-06    | 0.387805697  | 3.24E-10    |
| ARHGEF3  | turquoise | -0.317078909 | 4.00E-07    | -0.404924129 | 4.40E-11    |
| ARID3B   | turquoise | 0.182092125  | 0.004242263 | 0.491983293  | 2.44E-16    |
| ARL4A    | turquoise | -0.153563804 | 0.016143839 | -0.273157175 | 1.45E-05    |
| ARL6IP1  | turquoise | -0.350868058 | 1.66E-08    | -0.694690702 | 1.25E-36    |
| ARMC10   | turquoise | -0.300611971 | 1.65E-06    | -0.749425075 | 2.07E-45    |
| ARMCX5   | turquoise | -0.268485633 | 2.05E-05    | -0.580695901 | 1.73E-23    |
| ARPC1A   | turquoise | -0.144083974 | 0.024100752 | -0.423928115 | 4.17E-12    |
| ARPC5L   | turquoise | -0.274517388 | 1.31E-05    | -0.379850252 | 7.89E-10    |
| ARRB1    | turquoise | 0.267085081  | 2.27E-05    | 0.48964383   | 3.54E-16    |
| ARRDC2   | turquoise | 0.135661148  | 0.033804591 | 0.534577969  | 1.65E-19    |
| ARV1     | turquoise | -0.182208916 | 0.004217379 | -0.407555364 | 3.20E-11    |
| ASAP3    | turquoise | 0.332502115  | 9.81E-08    | 0.607112431  | 4.58E-26    |
| ASNS     | turquoise | -0.436819128 | 7.75E-13    | -0.479836616 | 1.64E-15    |
| ASTN1    | turquoise | -0.263862293 | 2.87E-05    | -0.550183677 | 8.70E-21    |
| ATAD1    | turquoise | -0.307082775 | 9.54E-07    | -0.408555851 | 2.84E-11    |
| ATAD3A   | turquoise | 0.209140399  | 0.000990121 | 0.333381721  | 9.03E-08    |



|          |           |              |             |              |             |
|----------|-----------|--------------|-------------|--------------|-------------|
| ATCAY    | turquoise | -0.210322323 | 0.000925134 | -0.466040457 | 1.30E-14    |
| ATL1     | turquoise | -0.318265752 | 3.60E-07    | -0.538099215 | 8.61E-20    |
| ATP10A   | turquoise | 0.272651016  | 1.50E-05    | 0.441291162  | 4.25E-13    |
| ATP11C   | turquoise | 0.29058144   | 3.74E-06    | 0.275856338  | 1.18E-05    |
| ATP1A1   | turquoise | -0.36558235  | 3.67E-09    | -0.603111324 | 1.17E-25    |
| ATP1B1   | turquoise | -0.411421412 | 2.00E-11    | -0.636220161 | 3.36E-29    |
| ATP2A2   | turquoise | -0.426556375 | 2.98E-12    | -0.71754995  | 4.81E-40    |
| ATP2B1   | turquoise | -0.365549254 | 3.68E-09    | -0.266988252 | 2.29E-05    |
| ATP2B2   | turquoise | -0.335874787 | 7.14E-08    | -0.449796025 | 1.32E-13    |
| ATP2B3   | turquoise | -0.375833707 | 1.23E-09    | -0.660167983 | 4.83E-32    |
| ATP6AP1  | turquoise | -0.329308604 | 1.32E-07    | -0.111358413 | 0.081940662 |
| ATP6AP2  | turquoise | -0.299433326 | 1.82E-06    | -0.654635348 | 2.31E-31    |
| ATP6V0E1 | turquoise | 0.300223352  | 1.70E-06    | 0.591982361  | 1.47E-24    |
| ATP6V1B2 | turquoise | -0.442578572 | 3.57E-13    | -0.568455712 | 2.27E-22    |
| ATP6V1C1 | turquoise | -0.286104355 | 5.34E-06    | -0.462628136 | 2.13E-14    |
| ATP6V1D  | turquoise | -0.401842515 | 6.35E-11    | -0.627382476 | 3.26E-28    |
| ATP6V1E1 | turquoise | -0.469989982 | 7.24E-15    | -0.506267538 | 2.36E-17    |
| ATP6V1G2 | turquoise | -0.497018798 | 1.09E-16    | -0.736664477 | 3.61E-43    |
| ATP6V1H  | turquoise | -0.300117503 | 1.72E-06    | -0.640195138 | 1.18E-29    |
| ATRN     | turquoise | -0.3530111   | 1.34E-08    | -0.609315143 | 2.72E-26    |
| ATRNL1   | turquoise | -0.222158723 | 0.000459303 | -0.570583773 | 1.46E-22    |
| AUH      | turquoise | -0.281441261 | 7.70E-06    | -0.668486409 | 4.31E-33    |
| AZIN1    | turquoise | -0.236611088 | 0.00018562  | -0.721666916 | 1.07E-40    |
| B3GALNT1 | turquoise | -0.351433727 | 1.57E-08    | -0.540021102 | 6.01E-20    |
| B3GNT6   | turquoise | -0.246878787 | 9.42E-05    | -0.712293688 | 3.14E-39    |
| B4GALT1  | turquoise | 0.190693491  | 0.002725509 | 0.143282329  | 0.024907218 |
| B4GALT4  | turquoise | 0.393800113  | 1.63E-10    | 0.593635153  | 1.01E-24    |
| B4GALT6  | turquoise | -0.352308974 | 1.44E-08    | -0.541292734 | 4.74E-20    |
| BACE2    | turquoise | 0.390865999  | 2.29E-10    | 0.373029432  | 1.66E-09    |
| BAG3     | turquoise | 0.272149234  | 1.56E-05    | 0.382194105  | 6.08E-10    |
| BAIAP2   | turquoise | -0.249189069 | 8.05E-05    | -0.371305064 | 2.00E-09    |
| BARD1    | turquoise | 0.301185287  | 1.57E-06    | 0.322109772  | 2.55E-07    |
| BASP1    | turquoise | -0.342285839 | 3.86E-08    | -0.639322119 | 1.49E-29    |
| BAZ1A    | turquoise | 0.443206731  | 3.28E-13    | 0.420632752  | 6.34E-12    |
| BAZ2B    | turquoise | 0.281466012  | 7.68E-06    | 0.613057505  | 1.11E-26    |
| BBX      | turquoise | 0.315465559  | 4.61E-07    | 0.410182804  | 2.33E-11    |
| BCAN     | turquoise | 0.183486899  | 0.003953559 | 0.3529554    | 1.35E-08    |
| BCAS2    | turquoise | -0.177487165 | 0.005335297 | -0.338521904 | 5.55E-08    |
| BCAT1    | turquoise | -0.273291743 | 1.43E-05    | -0.521991294 | 1.59E-18    |
| BCL6     | turquoise | 0.398944821  | 8.95E-11    | 0.58049569   | 1.81E-23    |

|           |           |              |             |              |             |
|-----------|-----------|--------------|-------------|--------------|-------------|
| BDNF      | turquoise | -0.383642166 | 5.18E-10    | -0.354564633 | 1.14E-08    |
| BEND6     | turquoise | -0.325489718 | 1.88E-07    | -0.553950783 | 4.18E-21    |
| BEX1      | turquoise | -0.433289904 | 1.24E-12    | -0.702147048 | 1.04E-37    |
| BEX2      | turquoise | -0.426896998 | 2.85E-12    | -0.692994113 | 2.17E-36    |
| BGN       | turquoise | 0.427584197  | 2.61E-12    | 0.600078294  | 2.35E-25    |
| BHLHB9    | turquoise | -0.207591155 | 0.001081667 | -0.49742246  | 1.02E-16    |
| BHLHE22   | turquoise | -0.147873341 | 0.020586078 | -0.441701992 | 4.02E-13    |
| BMPER     | turquoise | -0.259109922 | 4.04E-05    | -0.61017346  | 2.22E-26    |
| BMPR2     | turquoise | -0.168117654 | 0.00836937  | -0.558204537 | 1.80E-21    |
| BNIP3     | turquoise | -0.388687034 | 2.93E-10    | -0.461760476 | 2.42E-14    |
| BPTF      | turquoise | 0.466707508  | 1.18E-14    | 0.354697877  | 1.13E-08    |
| BRCA1     | turquoise | 0.245584082  | 0.000102757 | 0.293158335  | 3.04E-06    |
| BRWD1     | turquoise | -0.360266334 | 6.38E-09    | -0.649103871 | 1.07E-30    |
| BSCL2     | turquoise | -0.432099611 | 1.45E-12    | -0.322559685 | 2.45E-07    |
| BSN       | turquoise | -0.378283062 | 9.37E-10    | -0.257321112 | 4.58E-05    |
| BST2      | turquoise | 0.129323227  | 0.04313742  | 0.594748708  | 7.88E-25    |
| BTBD10    | turquoise | -0.333700247 | 8.76E-08    | -0.722686573 | 7.38E-41    |
| BTBD11    | turquoise | -0.193347462 | 0.002368744 | -0.252097156 | 6.60E-05    |
| BTBD3     | turquoise | -0.328868829 | 1.37E-07    | -0.547055179 | 1.59E-20    |
| BTF3L4    | turquoise | -0.241081493 | 0.000138641 | -0.638935034 | 1.65E-29    |
| BZW2      | turquoise | -0.187581938 | 0.003205483 | -0.470633434 | 6.58E-15    |
| C11orf58  | turquoise | -0.220373821 | 0.000511675 | -0.515858671 | 4.63E-18    |
| C11orf87  | turquoise | -0.227766293 | 0.000325351 | -0.460734085 | 2.81E-14    |
| C14orf132 | turquoise | -0.287617664 | 4.74E-06    | -0.311326341 | 6.62E-07    |
| C14orf93  | turquoise | 0.292309591  | 3.26E-06    | 0.39574011   | 1.30E-10    |
| C18orf32  | turquoise | -0.218805366 | 0.000562208 | -0.123926942 | 0.052706504 |
| C19orf54  | turquoise | 0.28165708   | 7.57E-06    | 0.315588755  | 4.56E-07    |
| C1orf162  | turquoise | 0.316484092  | 4.21E-07    | 0.427969095  | 2.48E-12    |
| C1orf216  | turquoise | -0.235029865 | 0.000205532 | -0.444081259 | 2.91E-13    |
| C1QTNF1   | turquoise | 0.352155744  | 1.46E-08    | 0.522771957  | 1.38E-18    |
| C1QTNF5   | turquoise | 0.375125747  | 1.32E-09    | 0.216895603  | 0.000629964 |
| C2CD2     | turquoise | 0.317566347  | 3.83E-07    | 0.67416898   | 7.91E-34    |
| C3orf14   | turquoise | -0.27577592  | 1.19E-05    | -0.564195936 | 5.42E-22    |
| C4orf33   | turquoise | -0.185363567 | 0.003593097 | -0.324410864 | 2.07E-07    |
| C5orf22   | turquoise | -0.398375894 | 9.57E-11    | -0.639710319 | 1.34E-29    |
| C7        | turquoise | 0.286005863  | 5.39E-06    | 0.122502391  | 0.055508075 |
| CA10      | turquoise | -0.424142168 | 4.06E-12    | -0.442047538 | 3.84E-13    |
| CAB39     | turquoise | -0.253956449 | 5.80E-05    | -0.609587503 | 2.55E-26    |
| CAB39L    | turquoise | 0.416490815  | 1.07E-11    | 0.367851721  | 2.89E-09    |
| CABYR     | turquoise | -0.228935509 | 0.000302457 | -0.402560474 | 5.83E-11    |

|          |           |              |             |              |             |
|----------|-----------|--------------|-------------|--------------|-------------|
| CACNA2D3 | turquoise | -0.18374298  | 0.003902522 | -0.397609118 | 1.05E-10    |
| CACNB2   | turquoise | -0.37317719  | 1.63E-09    | -0.560197324 | 1.21E-21    |
| CACNB4   | turquoise | -0.211003597 | 0.000889483 | -0.19305336  | 0.002406071 |
| CADM4    | turquoise | 0.32105919   | 2.80E-07    | 0.629305728  | 2.00E-28    |
| CADPS    | turquoise | -0.317434909 | 3.87E-07    | -0.727619785 | 1.17E-41    |
| CADPS2   | turquoise | -0.178506101 | 0.005073718 | -0.384797946 | 4.55E-10    |
| CALB1    | turquoise | -0.297967514 | 2.05E-06    | -0.231057401 | 0.000264695 |
| CALD1    | turquoise | 0.313375874  | 5.54E-07    | 0.739620673  | 1.12E-43    |
| CALM1    | turquoise | -0.333001675 | 9.36E-08    | -0.717546535 | 4.82E-40    |
| CALML4   | turquoise | 0.270626225  | 1.75E-05    | 0.388245385  | 3.08E-10    |
| CAMK2D   | turquoise | -0.260286268 | 3.71E-05    | -0.219028737 | 0.000554739 |
| CAMK4    | turquoise | -0.331247238 | 1.10E-07    | -0.358803762 | 7.42E-09    |
| CAMTA1   | turquoise | -0.358043825 | 8.02E-09    | -0.389914825 | 2.55E-10    |
| CAP2     | turquoise | -0.403090611 | 5.47E-11    | -0.550216868 | 8.64E-21    |
| CAPRIN1  | turquoise | -0.420330781 | 6.59E-12    | -0.4147225   | 1.33E-11    |
| CAPRIN2  | turquoise | -0.296255267 | 2.36E-06    | -0.426062867 | 3.17E-12    |
| CAPS     | turquoise | 0.432481982  | 1.38E-12    | 0.691645658  | 3.36E-36    |
| CARHSP1  | turquoise | 0.210526604  | 0.000914308 | 0.435808391  | 8.87E-13    |
| CARTPT   | turquoise | -0.34160879  | 4.12E-08    | -0.249922117 | 7.66E-05    |
| CASC3    | turquoise | 0.299281649  | 1.84E-06    | 0.271060136  | 1.69E-05    |
| CASP7    | turquoise | 0.174216842  | 0.006258568 | 0.272592008  | 1.51E-05    |
| CAV1     | turquoise | 0.326782948  | 1.67E-07    | 0.272432735  | 1.53E-05    |
| CBLB     | turquoise | 0.37709485   | 1.07E-09    | 0.525281349  | 8.87E-19    |
| CBLN4    | turquoise | -0.33299962  | 9.36E-08    | -0.605198745 | 7.17E-26    |
| CBS      | turquoise | 0.307215011  | 9.43E-07    | 0.568999026  | 2.03E-22    |
| CCDC102A | turquoise | 0.38685375   | 3.61E-10    | 0.578117762  | 3.01E-23    |
| CCDC151  | turquoise | 0.230634018  | 0.000271859 | 0.588089983  | 3.47E-24    |
| CCKBR    | turquoise | -0.382533836 | 5.86E-10    | -0.561698098 | 8.97E-22    |
| CCL5     | turquoise | 0.370183021  | 2.25E-09    | 0.471607963  | 5.69E-15    |
| CCND1    | turquoise | 0.183302009  | 0.003990782 | 0.395089793  | 1.40E-10    |
| CCNDBP1  | turquoise | -0.269270255 | 1.93E-05    | -0.72043592  | 1.69E-40    |
| CCNH     | turquoise | -0.253555893 | 5.96E-05    | -0.443339731 | 3.22E-13    |
| CCT4     | turquoise | -0.122574468 | 0.055363422 | -0.184165691 | 0.003819575 |
| CD151    | turquoise | 0.355142447  | 1.08E-08    | 0.708378604  | 1.23E-38    |
| CD163    | turquoise | 0.279011104  | 9.28E-06    | 0.114175216  | 0.074452418 |
| CD24     | turquoise | -0.178103726 | 0.005175606 | -0.305221526 | 1.12E-06    |
| CD34     | turquoise | 0.337840086  | 5.92E-08    | 0.389191062  | 2.77E-10    |
| CD44     | turquoise | 0.322901179  | 2.37E-07    | 0.144966107  | 0.023239416 |
| CD47     | turquoise | -0.296009731 | 2.41E-06    | -0.504844272 | 3.00E-17    |
| CD63     | turquoise | 0.282427463  | 7.13E-06    | 0.496049765  | 1.27E-16    |

|          |           |              |             |              |             |
|----------|-----------|--------------|-------------|--------------|-------------|
| CD79B    | turquoise | 0.249794785  | 7.73E-05    | 0.625106096  | 5.78E-28    |
| CD83     | turquoise | -0.262384834 | 3.20E-05    | -0.477101396 | 2.49E-15    |
| CDC40    | turquoise | -0.245563294 | 0.000102901 | -0.504490601 | 3.18E-17    |
| CDC42SE2 | turquoise | -0.278900953 | 9.36E-06    | -0.369745888 | 2.36E-09    |
| CDH10    | turquoise | -0.271169164 | 1.68E-05    | -0.400634993 | 7.33E-11    |
| CDH12    | turquoise | -0.261225    | 3.47E-05    | -0.436841898 | 7.73E-13    |
| CDH13    | turquoise | -0.258751151 | 4.14E-05    | -0.505971314 | 2.48E-17    |
| CDH23    | turquoise | 0.297771093  | 2.08E-06    | 0.311621575  | 6.45E-07    |
| CDH8     | turquoise | -0.189636037 | 0.002880766 | -0.411124211 | 2.07E-11    |
| CDK5     | turquoise | -0.28604284  | 5.37E-06    | -0.413534602 | 1.54E-11    |
| CDK5RAP2 | turquoise | 0.273546906  | 1.41E-05    | 0.6033955    | 1.09E-25    |
| CDK7     | turquoise | -0.208055271 | 0.001053457 | -0.05431873  | 0.39727406  |
| CDKN1A   | turquoise | 0.249379373  | 7.95E-05    | 0.282680729  | 6.99E-06    |
| CDO1     | turquoise | -0.246600146 | 9.60E-05    | -0.386128368 | 3.92E-10    |
| CDR2L    | turquoise | 0.125487906  | 0.049772555 | 0.575183827  | 5.59E-23    |
| CEBPD    | turquoise | 0.323956072  | 2.16E-07    | 0.364248784  | 4.22E-09    |
| CEP164   | turquoise | 0.230699102  | 0.000270746 | 0.583131516  | 1.03E-23    |
| CEP290   | turquoise | 0.281239669  | 7.82E-06    | 0.621582395  | 1.39E-27    |
| CFH      | turquoise | 0.240200716  | 0.00014691  | 0.294470806  | 2.73E-06    |
| CFI      | turquoise | 0.265090595  | 2.63E-05    | 0.276626137  | 1.11E-05    |
| CFLAR    | turquoise | 0.399802542  | 8.09E-11    | 0.798421707  | 1.84E-55    |
| CHCHD2   | turquoise | -0.348811401 | 2.04E-08    | -0.500591349 | 6.06E-17    |
| CHCHD6   | turquoise | -0.241991897 | 0.000130553 | -0.534338634 | 1.72E-19    |
| CHD2     | turquoise | 0.206515912  | 0.001149711 | 0.214017582  | 0.000746442 |
| CHDH     | turquoise | 0.388297826  | 3.06E-10    | 0.542288765  | 3.93E-20    |
| CHGB     | turquoise | -0.412165029 | 1.82E-11    | -0.718256018 | 3.73E-40    |
| CHL1     | turquoise | -0.272484011 | 1.52E-05    | -0.646832145 | 1.99E-30    |
| CHM      | turquoise | -0.210001015 | 0.0009424   | -0.364764044 | 4.00E-09    |
| CHMP1B   | turquoise | -0.129829765 | 0.042319358 | -0.618122736 | 3.26E-27    |
| CHMP4B   | turquoise | -0.383127924 | 5.48E-10    | -0.403755574 | 5.06E-11    |
| CHRM3    | turquoise | -0.098515138 | 0.124082085 | -0.354993    | 1.09E-08    |
| CHST6    | turquoise | 0.498355648  | 8.73E-17    | 0.504529459  | 3.16E-17    |
| CHSY1    | turquoise | 0.236624975  | 0.000185454 | 0.369514489  | 2.42E-09    |
| CHURC1   | turquoise | -0.086970332 | 0.174809279 | -0.194060711 | 0.002280397 |
| CIB2     | turquoise | 0.287514822  | 4.78E-06    | 0.379120147  | 8.55E-10    |
| CIC      | turquoise | 0.269141304  | 1.95E-05    | 0.12276492   | 0.054982704 |
| CIRBP    | turquoise | -0.335056423 | 7.71E-08    | -0.495099671 | 1.48E-16    |
| CISD1    | turquoise | -0.447319631 | 1.86E-13    | -0.533444442 | 2.03E-19    |
| CITED2   | turquoise | -0.334718955 | 7.96E-08    | -0.433129441 | 1.26E-12    |
| CLASP2   | turquoise | -0.22715261  | 0.000338003 | -0.708713089 | 1.10E-38    |

|          |           |              |             |              |             |
|----------|-----------|--------------|-------------|--------------|-------------|
| CLCN4    | turquoise | -0.225271386 | 0.000379692 | -0.488260366 | 4.41E-16    |
| CLDN15   | turquoise | 0.334512929  | 8.12E-08    | 0.487108749  | 5.29E-16    |
| CLDN5    | turquoise | 0.329414394  | 1.31E-07    | 0.516192314  | 4.37E-18    |
| CLIC1    | turquoise | 0.373550968  | 1.57E-09    | 0.26621875   | 2.42E-05    |
| CLIP2    | turquoise | 0.227778985  | 0.000325094 | 0.251198046  | 7.02E-05    |
| CLTA     | turquoise | -0.394729592 | 1.46E-10    | -0.468084548 | 9.60E-15    |
| CLTC     | turquoise | -0.343525152 | 3.42E-08    | -0.50324946  | 3.91E-17    |
| CLUL1    | turquoise | -0.223868631 | 0.000413835 | -0.305146587 | 1.12E-06    |
| CMAS     | turquoise | -0.34951019  | 1.90E-08    | -0.680876204 | 1.02E-34    |
| CMTM3    | turquoise | 0.179520218  | 0.004824875 | 0.403866046  | 4.99E-11    |
| CNOT7    | turquoise | -0.22718126  | 0.000337402 | -0.698300355 | 3.78E-37    |
| CNPY4    | turquoise | 0.429842088  | 1.94E-12    | 0.487519127  | 4.96E-16    |
| CNRIP1   | turquoise | -0.322263188 | 2.51E-07    | -0.541653236 | 4.43E-20    |
| CNTNAP5  | turquoise | -0.295768521 | 2.46E-06    | -0.260090764 | 3.77E-05    |
| COBLL1   | turquoise | 0.336470352  | 6.74E-08    | 0.395397074  | 1.36E-10    |
| COL18A1  | turquoise | 0.185614475  | 0.003547225 | 0.427952901  | 2.49E-12    |
| COL24A1  | turquoise | -0.151203518 | 0.017873037 | -0.414635272 | 1.34E-11    |
| COL5A2   | turquoise | -0.128383951 | 0.044689515 | -0.243110383 | 0.000121222 |
| COPS2    | turquoise | -0.190176119 | 0.002800495 | -0.231572624 | 0.000256213 |
| COPS3    | turquoise | -0.304833562 | 1.15E-06    | -0.543658275 | 3.03E-20    |
| COPS4    | turquoise | -0.306312803 | 1.02E-06    | -0.682201755 | 6.74E-35    |
| COPS5    | turquoise | -0.265696923 | 2.51E-05    | -0.561591862 | 9.17E-22    |
| COPS8    | turquoise | -0.339621054 | 4.99E-08    | -0.519176786 | 2.60E-18    |
| COX5A    | turquoise | -0.321788625 | 2.62E-07    | -0.669155428 | 3.54E-33    |
| COX6B1   | turquoise | -0.391401614 | 2.15E-10    | -0.637767854 | 2.24E-29    |
| COX6C    | turquoise | -0.159471396 | 0.012441353 | -0.465378946 | 1.43E-14    |
| COX7A2L  | turquoise | -0.355702644 | 1.02E-08    | -0.577250088 | 3.61E-23    |
| CP       | turquoise | 0.239536735  | 0.000153446 | 0.091904326  | 0.151512197 |
| CPM      | turquoise | 0.230216164  | 0.000279107 | 0.337894898  | 5.89E-08    |
| CPNE4    | turquoise | -0.271352308 | 1.66E-05    | -0.432753561 | 1.33E-12    |
| CRB1     | turquoise | 0.201397607  | 0.001530793 | 0.369559016  | 2.41E-09    |
| CRBN     | turquoise | -0.422055165 | 5.30E-12    | -0.633804067 | 6.30E-29    |
| CREBBP   | turquoise | 0.288639319  | 4.37E-06    | 0.353321489  | 1.30E-08    |
| CREG2    | turquoise | -0.310105265 | 7.36E-07    | -0.480075023 | 1.58E-15    |
| CRH      | turquoise | -0.287814638 | 4.67E-06    | -0.380533582 | 7.32E-10    |
| CRHBP    | turquoise | -0.257727442 | 4.45E-05    | -0.369643334 | 2.39E-09    |
| CRISPLD2 | turquoise | 0.273437338  | 1.42E-05    | 0.274448175  | 1.31E-05    |
| CRTAP    | turquoise | 0.42179146   | 5.48E-12    | 0.364117395  | 4.28E-09    |
| CRYAB    | turquoise | 0.169993673  | 0.007661119 | 0.25809171   | 4.34E-05    |
| CRYM     | turquoise | -0.428220629 | 2.40E-12    | -0.602356556 | 1.39E-25    |

|         |           |              |             |              |             |
|---------|-----------|--------------|-------------|--------------|-------------|
| CSF1R   | turquoise | 0.319195968  | 3.31E-07    | 0.362671454  | 4.98E-09    |
| CSF3R   | turquoise | 0.281662846  | 7.56E-06    | 0.350207243  | 1.77E-08    |
| CSK     | turquoise | 0.278125026  | 9.94E-06    | 0.31212531   | 6.17E-07    |
| CSMD3   | turquoise | -0.18517172  | 0.003628533 | -0.385229711 | 4.33E-10    |
| CSPG4   | turquoise | 0.249496518  | 7.88E-05    | 0.658332907  | 8.14E-32    |
| CSRNP2  | turquoise | -0.184806881 | 0.003696793 | -0.67453906  | 7.07E-34    |
| CSRP1   | turquoise | 0.290127939  | 3.88E-06    | 0.303909343  | 1.25E-06    |
| CTDSP1  | turquoise | 0.312149843  | 6.16E-07    | 0.48964155   | 3.55E-16    |
| CTDSP2  | turquoise | 0.432757795  | 1.33E-12    | 0.714587762  | 1.39E-39    |
| CTDSPL  | turquoise | 0.26832893   | 2.07E-05    | 0.688704391  | 8.65E-36    |
| CTNS    | turquoise | 0.296038114  | 2.40E-06    | 0.52357892   | 1.20E-18    |
| CTSH    | turquoise | 0.342616923  | 3.74E-08    | 0.367134259  | 3.12E-09    |
| CUEDC1  | turquoise | 0.335317608  | 7.52E-08    | 0.680370235  | 1.19E-34    |
| CXADR   | turquoise | -0.198637806 | 0.001781278 | -0.441571083 | 4.09E-13    |
| CXCL16  | turquoise | 0.314897656  | 4.85E-07    | 0.387842058  | 3.23E-10    |
| CYP26B1 | turquoise | -0.289048614 | 4.23E-06    | -0.582588387 | 1.15E-23    |
| CYP2C8  | turquoise | -0.259012242 | 4.07E-05    | -0.280918507 | 8.01E-06    |
| CYP4X1  | turquoise | -0.408552878 | 2.84E-11    | -0.523979155 | 1.12E-18    |
| CYYR1   | turquoise | 0.19693527   | 0.001953928 | 0.292927663  | 3.10E-06    |
| DAB2    | turquoise | 0.400185802  | 7.73E-11    | 0.416651269  | 1.05E-11    |
| DACH2   | turquoise | -0.296019606 | 2.41E-06    | -0.592350791 | 1.35E-24    |
| DAPK1   | turquoise | -0.127325061 | 0.046495131 | -0.552872541 | 5.16E-21    |
| DCK     | turquoise | -0.293896114 | 2.86E-06    | -0.752390866 | 5.95E-46    |
| DCLK1   | turquoise | -0.349006356 | 2.00E-08    | -0.686789323 | 1.59E-35    |
| DCN     | turquoise | 0.452112256  | 9.57E-14    | 0.386125443  | 3.92E-10    |
| DCTN2   | turquoise | -0.290153452 | 3.87E-06    | -0.493421566 | 1.94E-16    |
| DCTN3   | turquoise | -0.199119052 | 0.001735068 | -0.63165129  | 1.10E-28    |
| DCTN6   | turquoise | -0.288221962 | 4.52E-06    | -0.448842539 | 1.51E-13    |
| DCUN1D5 | turquoise | -0.382200521 | 6.08E-10    | -0.604809595 | 7.85E-26    |
| DDAH2   | turquoise | 0.298451522  | 1.97E-06    | 0.398832492  | 9.07E-11    |
| DDIT4   | turquoise | 0.425632636  | 3.35E-12    | 0.566868872  | 3.14E-22    |
| DDR1    | turquoise | 0.089963798  | 0.160377551 | 0.17714838   | 0.005424912 |
| DDR2    | turquoise | 0.327961614  | 1.50E-07    | 0.461252837  | 2.61E-14    |
| DDX1    | turquoise | -0.30799868  | 8.82E-07    | -0.684443864 | 3.34E-35    |
| DDX10   | turquoise | -0.322758425 | 2.40E-07    | -0.560946012 | 1.04E-21    |
| DDX25   | turquoise | -0.189897044 | 0.002841716 | -0.435195811 | 9.62E-13    |
| DHCR24  | turquoise | -0.264171943 | 2.81E-05    | -0.319831472 | 3.13E-07    |
| DHRS3   | turquoise | 0.368555093  | 2.68E-09    | 0.480623574  | 1.45E-15    |
| DHRS7   | turquoise | -0.111276315 | 0.082167699 | -0.444815065 | 2.63E-13    |
| DHRS7B  | turquoise | -0.316167846 | 4.33E-07    | -0.164648337 | 0.009833862 |

|          |           |              |             |              |             |
|----------|-----------|--------------|-------------|--------------|-------------|
| DHX34    | turquoise | 0.242913217  | 0.00012282  | 0.569631761  | 1.78E-22    |
| DHX37    | turquoise | 0.183759534  | 0.003899243 | 0.502315995  | 4.56E-17    |
| DIRAS2   | turquoise | -0.346355137 | 2.59E-08    | -0.664502542 | 1.38E-32    |
| DLC1     | turquoise | 0.333821526  | 8.66E-08    | 0.671369982  | 1.83E-33    |
| DLD      | turquoise | -0.319620896 | 3.19E-07    | -0.650148616 | 8.02E-31    |
| DLG3     | turquoise | -0.242746716 | 0.000124185 | -0.237793628 | 0.000171923 |
| DLX1     | turquoise | -0.219928138 | 0.000525588 | -0.547238732 | 1.53E-20    |
| DMXL2    | turquoise | -0.185595141 | 0.003550741 | -0.683683109 | 4.24E-35    |
| DNAJA2   | turquoise | -0.344466247 | 3.12E-08    | -0.384083822 | 4.93E-10    |
| DNAJA4   | turquoise | -0.127904174 | 0.045500212 | -0.364087242 | 4.29E-09    |
| DNAJB2   | turquoise | 0.193361867  | 0.002366929 | 0.542706355  | 3.63E-20    |
| DNAJB9   | turquoise | -0.423967547 | 4.15E-12    | -0.447829004 | 1.74E-13    |
| DNAJC12  | turquoise | -0.221412573 | 0.00048056  | -0.587128923 | 4.29E-24    |
| DNAJC19  | turquoise | -0.281890482 | 7.43E-06    | -0.452168144 | 9.49E-14    |
| DNER     | turquoise | -0.290341564 | 3.81E-06    | -0.580049145 | 1.99E-23    |
| DNM1L    | turquoise | -0.258370034 | 4.26E-05    | -0.664223616 | 1.50E-32    |
| DNM3     | turquoise | -0.451320106 | 1.07E-13    | -0.673007238 | 1.12E-33    |
| DOCK1    | turquoise | 0.363037948  | 4.79E-09    | 0.449467599  | 1.38E-13    |
| DOCK3    | turquoise | -0.250826182 | 7.20E-05    | -0.768506771 | 4.98E-49    |
| DOCK6    | turquoise | 0.319077088  | 3.35E-07    | 0.379715241  | 8.01E-10    |
| DPP10    | turquoise | -0.193751118 | 0.00231837  | -0.49738776  | 1.02E-16    |
| DPP8     | turquoise | -0.233881027 | 0.000221231 | -0.744569136 | 1.53E-44    |
| DPP9     | turquoise | 0.136911333  | 0.032182279 | 0.355077919  | 1.09E-08    |
| DPY30    | turquoise | -0.243705981 | 0.000116511 | -0.608012257 | 3.70E-26    |
| DRG1     | turquoise | -0.255341163 | 5.27E-05    | -0.611529464 | 1.61E-26    |
| DSE      | turquoise | 0.464369536  | 1.66E-14    | 0.207789643  | 0.001069519 |
| DST      | turquoise | 0.400137245  | 7.77E-11    | 0.156347516  | 0.014293764 |
| DSTN     | turquoise | -0.363083002 | 4.77E-09    | -0.57348427  | 7.99E-23    |
| DTNA     | turquoise | 0.22912201   | 0.000298947 | 0.348787703  | 2.04E-08    |
| DUSP1    | turquoise | 0.322218654  | 2.52E-07    | 0.125901684  | 0.049018065 |
| DYNC1I1  | turquoise | -0.391424887 | 2.14E-10    | -0.762851487 | 6.39E-48    |
| DYNLT3   | turquoise | -0.34281688  | 3.67E-08    | -0.733733664 | 1.13E-42    |
| EAPP     | turquoise | -0.181152565 | 0.004447313 | -0.373163841 | 1.64E-09    |
| EBNA1BP2 | turquoise | -0.333990001 | 8.53E-08    | -0.616012581 | 5.46E-27    |
| ECHDC2   | turquoise | 0.282246436  | 7.23E-06    | 0.638124996  | 2.04E-29    |
| EDN1     | turquoise | 0.15977492   | 0.012273162 | 0.297937611  | 2.06E-06    |
| EEF1D    | turquoise | 0.18480818   | 0.003696548 | 0.281247938  | 7.81E-06    |
| EEF1E1   | turquoise | -0.31493535  | 4.83E-07    | -0.561752621 | 8.87E-22    |
| EEF2K    | turquoise | 0.370676148  | 2.14E-09    | 0.508169035  | 1.72E-17    |
| EFCAB7   | turquoise | -0.209357547 | 0.000977875 | -0.424267109 | 4.00E-12    |

|          |           |              |             |              |             |
|----------|-----------|--------------|-------------|--------------|-------------|
| EFNA1    | turquoise | 0.223467092  | 0.00042412  | 0.393883519  | 1.62E-10    |
| EFNB3    | turquoise | -0.106867983 | 0.09512197  | -0.209010192 | 0.000997531 |
| EGR1     | turquoise | -0.238005326 | 0.000169573 | -0.269555327 | 1.89E-05    |
| EHD1     | turquoise | 0.217124906  | 0.000621447 | 0.694542965  | 1.31E-36    |
| EHD2     | turquoise | 0.394040457  | 1.59E-10    | 0.517238171  | 3.65E-18    |
| EHD3     | turquoise | -0.373903961 | 1.51E-09    | -0.48454513  | 7.90E-16    |
| EID2     | turquoise | -0.345600998 | 2.79E-08    | -0.71320871  | 2.27E-39    |
| EIF1B    | turquoise | -0.28854899  | 4.40E-06    | -0.733978934 | 1.03E-42    |
| EIF2B3   | turquoise | -0.311500721 | 6.52E-07    | -0.263070018 | 3.04E-05    |
| EIF4A2   | turquoise | -0.382881276 | 5.64E-10    | -0.595666265 | 6.41E-25    |
| EIF4E3   | turquoise | -0.228898347 | 0.000303161 | -0.687901685 | 1.12E-35    |
| EIF4H    | turquoise | -0.392698646 | 1.85E-10    | -0.718270698 | 3.71E-40    |
| ELAVL2   | turquoise | -0.249628773 | 7.81E-05    | -0.516251122 | 4.33E-18    |
| ELAVL4   | turquoise | -0.293155885 | 3.04E-06    | -0.501561542 | 5.16E-17    |
| ELF2     | turquoise | 0.362442386  | 5.10E-09    | 0.524925238  | 9.45E-19    |
| ELK1     | turquoise | 0.366772472  | 3.24E-09    | 0.48100789   | 1.37E-15    |
| ELMO1    | turquoise | -0.33962481  | 4.99E-08    | -0.338793467 | 5.40E-08    |
| ELMOD1   | turquoise | -0.28601236  | 5.38E-06    | -0.717315263 | 5.23E-40    |
| ELOVL4   | turquoise | -0.363998253 | 4.33E-09    | -0.481139923 | 1.34E-15    |
| EML3     | turquoise | 0.326602723  | 1.69E-07    | 0.666799408  | 7.08E-33    |
| EMP1     | turquoise | 0.295545273  | 2.50E-06    | 0.145923959  | 0.02233435  |
| EMP3     | turquoise | 0.26181765   | 3.33E-05    | 0.0227198    | 0.723452697 |
| ENAH     | turquoise | 0.491558105  | 2.61E-16    | 0.601702105  | 1.62E-25    |
| ENC1     | turquoise | -0.328074069 | 1.48E-07    | -0.492254929 | 2.34E-16    |
| ENHO     | turquoise | 0.096469954  | 0.13212223  | 0.396544992  | 1.19E-10    |
| ENO3     | turquoise | 0.273750874  | 1.38E-05    | 0.526158092  | 7.58E-19    |
| ENOPH1   | turquoise | -0.248956091 | 8.18E-05    | -0.603166749 | 1.15E-25    |
| ENPP5    | turquoise | -0.343618784 | 3.39E-08    | -0.384372907 | 4.77E-10    |
| ENTPD2   | turquoise | 0.27517597   | 1.24E-05    | 0.231170625  | 0.000262809 |
| ENTPD3   | turquoise | -0.19497837  | 0.002171146 | -0.581272624 | 1.53E-23    |
| EPAS1    | turquoise | 0.263616898  | 2.92E-05    | 0.266495349  | 2.37E-05    |
| EPB41L3  | turquoise | -0.35913256  | 7.18E-09    | -0.764488256 | 3.07E-48    |
| EPB41L4B | turquoise | -0.20777047  | 0.001070687 | -0.39052625  | 2.38E-10    |
| EPHA3    | turquoise | -0.145726951 | 0.022517973 | -0.311390089 | 6.58E-07    |
| EPHA4    | turquoise | -0.304346991 | 1.20E-06    | -0.642891637 | 5.75E-30    |
| EPHA5    | turquoise | -0.203318218 | 0.001375972 | -0.328958538 | 1.36E-07    |
| EPM2AIP1 | turquoise | -0.35500174  | 1.09E-08    | -0.505708418 | 2.60E-17    |
| EPS15    | turquoise | -0.271824883 | 1.60E-05    | -0.480202812 | 1.55E-15    |
| ERC2     | turquoise | -0.265425771 | 2.56E-05    | -0.357775983 | 8.25E-09    |
| ESAM     | turquoise | 0.304108832  | 1.23E-06    | 0.342499184  | 3.78E-08    |



|         |           |              |             |              |             |
|---------|-----------|--------------|-------------|--------------|-------------|
| ETS1    | turquoise | 0.343307889  | 3.49E-08    | 0.444473224  | 2.76E-13    |
| ETS2    | turquoise | -0.109454081 | 0.087338769 | -0.218942892 | 0.000557598 |
| EXOC6   | turquoise | -0.260080307 | 3.77E-05    | -0.505270381 | 2.79E-17    |
| EXOSC9  | turquoise | -0.245122846 | 0.000105986 | -0.328869908 | 1.37E-07    |
| EXTL2   | turquoise | -0.238085921 | 0.000168686 | -0.499820842 | 6.87E-17    |
| FABP3   | turquoise | -0.247734382 | 8.89E-05    | -0.35978629  | 6.71E-09    |
| FAM131A | turquoise | -0.275550448 | 1.21E-05    | -0.224730502 | 0.000392535 |
| FAM162A | turquoise | -0.226209279 | 0.000358345 | -0.086749721 | 0.175909792 |
| FAM174A | turquoise | -0.310884441 | 6.88E-07    | -0.652039172 | 4.76E-31    |
| FAM181B | turquoise | 0.260981374  | 3.53E-05    | 0.279966509  | 8.63E-06    |
| FAM49B  | turquoise | -0.265874157 | 2.48E-05    | -0.384600304 | 4.65E-10    |
| FAM71E1 | turquoise | -0.212262451 | 0.000826917 | -0.241012866 | 0.000139269 |
| FAM89A  | turquoise | 0.280811009  | 8.08E-06    | 0.181395231  | 0.004393516 |
| FANCB   | turquoise | 0.450715407  | 1.16E-13    | 0.494125606  | 1.73E-16    |
| FAR2    | turquoise | -0.11560777  | 0.070862903 | -0.393119609 | 1.76E-10    |
| FBL     | turquoise | 0.319876126  | 3.12E-07    | 0.47575527   | 3.05E-15    |
| FBLN1   | turquoise | 0.219142787  | 0.000550962 | 0.35404904   | 1.20E-08    |
| FBXL2   | turquoise | -0.321865032 | 2.61E-07    | -0.555288945 | 3.21E-21    |
| FBXL7   | turquoise | 0.262517812  | 3.17E-05    | 0.494045723  | 1.76E-16    |
| FBXO28  | turquoise | -0.260778503 | 3.59E-05    | -0.253802953 | 5.86E-05    |
| FBXO34  | turquoise | -0.28438056  | 6.12E-06    | -0.588453737 | 3.21E-24    |
| FBXW4   | turquoise | 0.428397065  | 2.35E-12    | 0.742506815  | 3.53E-44    |
| FBXW7   | turquoise | -0.407499349 | 3.22E-11    | -0.431293518 | 1.61E-12    |
| FCGBP   | turquoise | 0.188444439  | 0.0030653   | 0.24349023   | 0.000118197 |
| FCGRT   | turquoise | 0.263089342  | 3.04E-05    | 0.24700823   | 9.34E-05    |
| FGD2    | turquoise | 0.178290384  | 0.005128115 | 0.432115131  | 1.44E-12    |
| FGF12   | turquoise | -0.425906836 | 3.24E-12    | -0.530397216 | 3.54E-19    |
| FGF14   | turquoise | -0.238119393 | 0.000168319 | -0.407350062 | 3.28E-11    |
| FGF9    | turquoise | -0.292514525 | 3.20E-06    | -0.118615936 | 0.063783871 |
| FGFRL1  | turquoise | 0.277763535  | 1.02E-05    | 0.376467801  | 1.14E-09    |
| FGL1    | turquoise | 0.138282301  | 0.030479926 | 0.392083633  | 1.99E-10    |
| FGR     | turquoise | 0.238326729  | 0.000166062 | 0.585227966  | 6.50E-24    |
| FH      | turquoise | -0.316096057 | 4.36E-07    | -0.311971943 | 6.26E-07    |
| FHL2    | turquoise | -0.207225268 | 0.001104394 | -0.382918723 | 5.61E-10    |
| FIG4    | turquoise | -0.232965579 | 0.000234533 | -0.402116506 | 6.15E-11    |
| FKBP1B  | turquoise | -0.308163243 | 8.69E-07    | -0.546727453 | 1.69E-20    |
| FKBP5   | turquoise | 0.259817751  | 3.84E-05    | 0.311473652  | 6.53E-07    |
| FLI1    | turquoise | 0.275646061  | 1.20E-05    | 0.316995467  | 4.03E-07    |
| FLRT3   | turquoise | -0.150837918 | 0.018154826 | -0.343860741 | 3.31E-08    |
| FLT1    | turquoise | 0.294464011  | 2.73E-06    | 0.076994691  | 0.229837489 |

|           |           |              |             |              |             |
|-----------|-----------|--------------|-------------|--------------|-------------|
| FMNL3     | turquoise | 0.260565936  | 3.64E-05    | 0.266933308  | 2.30E-05    |
| FOXC1     | turquoise | 0.376550504  | 1.13E-09    | 0.712344467  | 3.08E-39    |
| FOXD1     | turquoise | 0.327453018  | 1.57E-07    | 0.454035571  | 7.30E-14    |
| FOXJ1     | turquoise | 0.425370803  | 3.47E-12    | 0.452055997  | 9.64E-14    |
| FOXO4     | turquoise | 0.356763478  | 9.15E-09    | 0.584568819  | 7.50E-24    |
| FOXQ1     | turquoise | 0.318770566  | 3.44E-07    | 0.338570649  | 5.52E-08    |
| FRMPD2    | turquoise | -0.314429671 | 5.05E-07    | -0.247117911 | 9.27E-05    |
| FSIP1     | turquoise | -0.088700235 | 0.166356163 | -0.228582005 | 0.000309216 |
| FSTL5     | turquoise | -0.312174623 | 6.15E-07    | -0.49643742  | 1.19E-16    |
| FTO       | turquoise | -0.33110814  | 1.12E-07    | -0.632385387 | 9.08E-29    |
| FXYD5     | turquoise | 0.315561479  | 4.57E-07    | 0.524156064  | 1.08E-18    |
| FXYD6     | turquoise | -0.313840304 | 5.32E-07    | -0.467606056 | 1.03E-14    |
| FYCO1     | turquoise | 0.438743964  | 5.99E-13    | 0.5859158    | 5.60E-24    |
| FZD9      | turquoise | 0.392220799  | 1.96E-10    | 0.61090427   | 1.86E-26    |
| G3BP2     | turquoise | -0.272446425 | 1.53E-05    | -0.556966724 | 2.31E-21    |
| GABARAPL1 | turquoise | -0.406650444 | 3.57E-11    | -0.770394118 | 2.09E-49    |
| GABARAPL2 | turquoise | -0.247440777 | 9.07E-05    | -0.761827495 | 1.01E-47    |
| GABBR2    | turquoise | -0.397624221 | 1.04E-10    | -0.625516885 | 5.21E-28    |
| GABRA1    | turquoise | -0.385026661 | 4.43E-10    | -0.59469477  | 7.98E-25    |
| GABRA5    | turquoise | -0.22956145  | 0.000290826 | -0.660846791 | 3.98E-32    |
| GABRG2    | turquoise | -0.418213688 | 8.60E-12    | -0.508282625 | 1.69E-17    |
| GAD1      | turquoise | -0.368532502 | 2.69E-09    | -0.608749751 | 3.11E-26    |
| GAD2      | turquoise | -0.341404908 | 4.20E-08    | -0.547124508 | 1.57E-20    |
| GADD45G   | turquoise | 0.345877352  | 2.72E-08    | 0.536637476  | 1.13E-19    |
| GAL3ST4   | turquoise | 0.310482654  | 7.12E-07    | 0.49553603   | 1.38E-16    |
| GALNTL5   | turquoise | -0.176084911 | 0.005715062 | -0.232635141 | 0.000239516 |
| GAS1      | turquoise | 0.378326837  | 9.33E-10    | 0.264816063  | 2.68E-05    |
| GAS2L3    | turquoise | 0.375169825  | 1.32E-09    | 0.361922302  | 5.38E-09    |
| GATA2     | turquoise | 0.235219421  | 0.000203044 | 0.136008556  | 0.033346948 |
| GATAD2A   | turquoise | 0.259991039  | 3.79E-05    | 0.61864802   | 2.87E-27    |
| GBP2      | turquoise | 0.051604167  | 0.421317208 | 0.190866462  | 0.002700849 |
| GCNT2     | turquoise | 0.160279856  | 0.011997797 | 0.282363153  | 7.16E-06    |
| GDAP1     | turquoise | -0.3088522   | 8.20E-07    | -0.419747498 | 7.09E-12    |
| GDPD3     | turquoise | 0.16013643   | 0.012075455 | 0.405215951  | 4.24E-11    |
| GEM       | turquoise | 0.482243246  | 1.13E-15    | 0.244988652  | 0.000106943 |
| GFAP      | turquoise | 0.41220804   | 1.81E-11    | 0.354824645  | 1.11E-08    |
| GGCT      | turquoise | -0.319971777 | 3.09E-07    | -0.631706072 | 1.08E-28    |
| GIMAP1    | turquoise | 0.156407016  | 0.014256338 | 0.319037837  | 3.36E-07    |
| GIMAP7    | turquoise | 0.242811031  | 0.000123656 | 0.466623472  | 1.19E-14    |
| GIMAP8    | turquoise | 0.318290859  | 3.59E-07    | 0.438787779  | 5.95E-13    |

|         |           |              |             |              |             |
|---------|-----------|--------------|-------------|--------------|-------------|
| GJA4    | turquoise | 0.318646753  | 3.48E-07    | 0.410923729  | 2.12E-11    |
| GLCE    | turquoise | -0.232851141 | 0.000236248 | -0.38315939  | 5.46E-10    |
| GLMN    | turquoise | -0.234115642 | 0.000217936 | -0.345551669 | 2.81E-08    |
| GLRA2   | turquoise | -0.260627817 | 3.62E-05    | -0.436978168 | 7.59E-13    |
| GLRB    | turquoise | -0.340647565 | 4.52E-08    | -0.676823555 | 3.53E-34    |
| GLRX    | turquoise | -0.277829941 | 1.02E-05    | -0.599432275 | 2.72E-25    |
| GLRX2   | turquoise | -0.176566764 | 0.005581916 | -0.205472468 | 0.00121948  |
| GLS     | turquoise | -0.301414616 | 1.54E-06    | -0.421516859 | 5.67E-12    |
| GLS2    | turquoise | -0.182272907 | 0.004203801 | -0.397866714 | 1.02E-10    |
| GMPR    | turquoise | 0.385132315  | 4.38E-10    | 0.338411447  | 5.60E-08    |
| GNA11   | turquoise | 0.134907346  | 0.034815959 | 0.46360951   | 1.85E-14    |
| GNAS    | turquoise | -0.186015455 | 0.003475015 | -0.61914174  | 2.54E-27    |
| GNB5    | turquoise | -0.156200968 | 0.014386313 | -0.339697981 | 4.95E-08    |
| GNG11   | turquoise | 0.319176228  | 3.32E-07    | 0.296487692  | 2.32E-06    |
| GNG2    | turquoise | -0.290814832 | 3.67E-06    | -0.704857631 | 4.15E-38    |
| GNG3    | turquoise | -0.356987254 | 8.94E-09    | -0.236633626 | 0.00018535  |
| GNPDA2  | turquoise | -0.240036903 | 0.000148498 | -0.385845716 | 4.04E-10    |
| GOLIM4  | turquoise | 0.334358169  | 8.24E-08    | 0.594333222  | 8.66E-25    |
| GOLT1B  | turquoise | -0.289433481 | 4.10E-06    | -0.492260473 | 2.34E-16    |
| GOT1    | turquoise | -0.402962659 | 5.56E-11    | -0.695246904 | 1.04E-36    |
| GOT2    | turquoise | -0.310300844 | 7.23E-07    | -0.602455514 | 1.36E-25    |
| GPM6A   | turquoise | -0.331481568 | 1.08E-07    | -0.588857913 | 2.93E-24    |
| GPN1    | turquoise | -0.264294407 | 2.78E-05    | -0.450684598 | 1.17E-13    |
| GPR158  | turquoise | -0.283020623 | 6.81E-06    | -0.051533571 | 0.421953593 |
| GPR19   | turquoise | -0.176128706 | 0.005702844 | -0.362691233 | 4.97E-09    |
| GPR22   | turquoise | -0.19433695  | 0.002246994 | -0.508874412 | 1.53E-17    |
| GPR4    | turquoise | 0.429385384  | 2.06E-12    | 0.405353932  | 4.17E-11    |
| GPR83   | turquoise | -0.104188358 | 0.103759109 | -0.139735292 | 0.028760229 |
| GPR88   | turquoise | -0.198314841 | 0.001812917 | -0.480946452 | 1.38E-15    |
| GPRASP1 | turquoise | -0.343340584 | 3.48E-08    | -0.365392654 | 3.74E-09    |
| GPRC5C  | turquoise | 0.253310357  | 6.07E-05    | 0.584845598  | 7.07E-24    |
| GPT     | turquoise | 0.361054388  | 5.88E-09    | 0.507310236  | 1.98E-17    |
| GRB14   | turquoise | -0.247100782 | 9.28E-05    | -0.307332726 | 9.34E-07    |
| GRIA1   | turquoise | -0.181482215 | 0.004374375 | -0.156027374 | 0.01449662  |
| GRIA2   | turquoise | -0.323912411 | 2.17E-07    | -0.413423726 | 1.56E-11    |
| GRIA4   | turquoise | -0.266445419 | 2.38E-05    | -0.488081068 | 4.54E-16    |
| GRIN2A  | turquoise | -0.379646539 | 8.07E-10    | -0.648200299 | 1.37E-30    |
| GRIN2C  | turquoise | 0.148243186  | 0.020268124 | 0.582965025  | 1.06E-23    |
| GRM1    | turquoise | -0.227711578 | 0.000326461 | -0.326519731 | 1.71E-07    |
| GRM8    | turquoise | -0.150226843 | 0.018634452 | -0.345572449 | 2.80E-08    |

|         |           |              |             |              |             |
|---------|-----------|--------------|-------------|--------------|-------------|
| GSDMD   | turquoise | 0.360057749  | 6.52E-09    | 0.669167131  | 3.53E-33    |
| GSN     | turquoise | 0.245608577  | 0.000102588 | 0.232583891  | 0.000240297 |
| GSTM2   | turquoise | 0.115681179  | 0.070682832 | 0.457127936  | 4.71E-14    |
| GSTO1   | turquoise | -0.176747781 | 0.00553262  | -0.226763051 | 0.000346269 |
| GYG2    | turquoise | 0.311206775  | 6.69E-07    | 0.284553827  | 6.04E-06    |
| GYPC    | turquoise | 0.209230938  | 0.000984998 | 0.29277203   | 3.14E-06    |
| HABP4   | turquoise | -0.321388036 | 2.72E-07    | -0.473119422 | 4.54E-15    |
| HACL1   | turquoise | -0.284537383 | 6.04E-06    | -0.391637721 | 2.09E-10    |
| HADHA   | turquoise | 0.230648903  | 0.000271604 | 0.416810975  | 1.03E-11    |
| HAPLN4  | turquoise | -0.110924845 | 0.083145404 | -0.123696125 | 0.053152297 |
| HAVCR2  | turquoise | 0.295381077  | 2.54E-06    | 0.33573227   | 7.23E-08    |
| HBP1    | turquoise | 0.447150861  | 1.91E-13    | 0.569324086  | 1.90E-22    |
| HBQ1    | turquoise | -0.208531105 | 0.001025239 | -0.196689956 | 0.001980026 |
| HCCS    | turquoise | -0.310232252 | 7.28E-07    | -0.613595134 | 9.79E-27    |
| HCG9    | turquoise | 0.060289474  | 0.347367043 | 0.625488794  | 5.25E-28    |
| HCLS1   | turquoise | 0.187774365  | 0.003173714 | 0.059241494  | 0.355827371 |
| HERC1   | turquoise | -0.363454921 | 4.59E-09    | -0.728670947 | 7.88E-42    |
| HERC5   | turquoise | 0.253057675  | 6.17E-05    | 0.491278066  | 2.73E-16    |
| HES6    | turquoise | 0.258755967  | 4.14E-05    | 0.562758513  | 7.25E-22    |
| HEY2    | turquoise | 0.434959543  | 9.92E-13    | 0.681466061  | 8.47E-35    |
| HEYL    | turquoise | 0.406181095  | 3.78E-11    | 0.419636301  | 7.19E-12    |
| HIF3A   | turquoise | -0.035338222 | 0.581994379 | 0.226162178  | 0.000359389 |
| HINT1   | turquoise | -0.333361862 | 9.05E-08    | -0.821038436 | 4.29E-61    |
| HK1     | turquoise | -0.328755295 | 1.39E-07    | -0.501532851 | 5.19E-17    |
| HLA-DMA | turquoise | 0.292717545  | 3.15E-06    | 0.346814302  | 2.48E-08    |
| HLA-DMB | turquoise | 0.285756524  | 5.49E-06    | 0.237730063  | 0.000172634 |
| HLA-E   | turquoise | 0.332501752  | 9.81E-08    | 0.322477521  | 2.47E-07    |
| HLF     | turquoise | -0.150298793 | 0.018577412 | -0.544790975 | 2.45E-20    |
| HMBOX1  | turquoise | 0.468405112  | 9.16E-15    | 0.418277465  | 8.53E-12    |
| HMGB2   | turquoise | 0.11036041   | 0.084735108 | 0.452334275  | 9.28E-14    |
| HMGCLL1 | turquoise | -0.284101246 | 6.26E-06    | -0.614679939 | 7.53E-27    |
| HMGCS1  | turquoise | -0.241177284 | 0.000137768 | -0.361673814 | 5.52E-09    |
| HNRNPA0 | turquoise | -0.272319783 | 1.54E-05    | -0.67754575  | 2.83E-34    |
| HOMER1  | turquoise | -0.284114771 | 6.25E-06    | -0.471270286 | 5.98E-15    |
| HOMER3  | turquoise | 0.395871286  | 1.28E-10    | 0.443958016  | 2.96E-13    |
| HOPX    | turquoise | -0.44542529  | 2.42E-13    | -0.645924585 | 2.54E-30    |
| HPCAL1  | turquoise | -0.483384497 | 9.46E-16    | -0.357919801 | 8.13E-09    |
| HPCAL4  | turquoise | -0.308746105 | 8.27E-07    | -0.514316993 | 6.04E-18    |
| HPRT1   | turquoise | -0.42616997  | 3.13E-12    | -0.723847593 | 4.80E-41    |
| HS3ST2  | turquoise | -0.241928299 | 0.000131103 | -0.231435053 | 0.000258453 |

|          |           |              |             |              |             |
|----------|-----------|--------------|-------------|--------------|-------------|
| HS6ST2   | turquoise | -0.315844617 | 4.46E-07    | -0.468147387 | 9.51E-15    |
| HSP90AB1 | turquoise | -0.277921504 | 1.01E-05    | -0.445073914 | 2.54E-13    |
| HSPA12A  | turquoise | -0.233033775 | 0.000233517 | -0.338073381 | 5.79E-08    |
| HSPA12B  | turquoise | 0.015200228  | 0.812875458 | 0.258720407  | 4.15E-05    |
| HSPA13   | turquoise | -0.250816406 | 7.20E-05    | -0.075280696 | 0.24040711  |
| HSPA1A   | turquoise | 0.148884199  | 0.019727128 | 0.411676284  | 1.94E-11    |
| HSPA8    | turquoise | -0.217679346 | 0.000601292 | -0.525266445 | 8.89E-19    |
| HSPB1    | turquoise | 0.292721125  | 3.15E-06    | 0.461897035  | 2.37E-14    |
| HSPB2    | turquoise | 0.458960633  | 3.62E-14    | 0.464470257  | 1.63E-14    |
| HSPB3    | turquoise | -0.403538629 | 5.19E-11    | -0.388227785 | 3.09E-10    |
| HSPH1    | turquoise | -0.198363963 | 0.001808072 | -0.249501682 | 7.88E-05    |
| HVCN1    | turquoise | 0.162208672  | 0.010995384 | 0.254894309  | 5.43E-05    |
| HYAL1    | turquoise | 0.297615014  | 2.11E-06    | 0.521855658  | 1.63E-18    |
| ICAM2    | turquoise | 0.361093226  | 5.86E-09    | 0.312125828  | 6.17E-07    |
| ID1      | turquoise | 0.229241042  | 0.000296727 | 0.219794642  | 0.000529823 |
| ID3      | turquoise | 0.313323602  | 5.56E-07    | 0.291388388  | 3.51E-06    |
| IDH3A    | turquoise | -0.271160917 | 1.68E-05    | -0.528374887 | 5.10E-19    |
| IDI1     | turquoise | -0.175872835 | 0.00577456  | -0.351049067 | 1.63E-08    |
| IER3     | turquoise | 0.231653761  | 0.000254901 | 0.257162373  | 4.63E-05    |
| IFI16    | turquoise | 0.225613898  | 0.000371763 | 0.133677137  | 0.036521644 |
| IFI27L2  | turquoise | 0.326151142  | 1.77E-07    | 0.416383309  | 1.08E-11    |
| IFIT1    | turquoise | -0.206729615 | 0.001135882 | -0.466020382 | 1.30E-14    |
| IFITM1   | turquoise | 0.326085845  | 1.78E-07    | 0.383067032  | 5.52E-10    |
| IFITM2   | turquoise | 0.177064931  | 0.005447193 | 0.297710703  | 2.09E-06    |
| IFITM3   | turquoise | 0.17327884   | 0.006548542 | 0.252488178  | 6.42E-05    |
| IGDCC3   | turquoise | 0.138231935  | 0.030541079 | 0.605771609  | 6.27E-26    |
| IGF1     | turquoise | -0.208620445 | 0.001020019 | -0.283722872 | 6.44E-06    |
| IGF2BP2  | turquoise | 0.284525347  | 6.05E-06    | 0.498753053  | 8.19E-17    |
| IGFBP7   | turquoise | 0.163169759  | 0.010524085 | 0.066199914  | 0.302059973 |
| IGSF3    | turquoise | -0.18753491  | 0.003213291 | -0.372626867 | 1.73E-09    |
| IL10RB   | turquoise | 0.231540722  | 0.000256731 | 0.558109633  | 1.84E-21    |
| IL1R1    | turquoise | 0.281052534  | 7.93E-06    | 0.172538175  | 0.006785933 |
| IL4R     | turquoise | 0.330995609  | 1.13E-07    | 0.490092356  | 3.30E-16    |
| ILK      | turquoise | 0.452898559  | 8.57E-14    | 0.480005952  | 1.59E-15    |
| IMP3     | turquoise | -0.285706869 | 5.51E-06    | -0.464661323 | 1.59E-14    |
| IMPA1    | turquoise | -0.205406954 | 0.001223988 | -0.265876926 | 2.48E-05    |
| IMPAD1   | turquoise | -0.236011275 | 0.000192951 | -0.398058416 | 9.93E-11    |
| INA      | turquoise | -0.347018823 | 2.43E-08    | -0.59061437  | 1.99E-24    |
| INHBB    | turquoise | 0.354289112  | 1.18E-08    | 0.498802789  | 8.12E-17    |
| INPP5D   | turquoise | 0.264387797  | 2.77E-05    | 0.416427875  | 1.08E-11    |

|          |           |              |             |              |             |
|----------|-----------|--------------|-------------|--------------|-------------|
| INSIG2   | turquoise | -0.264152577 | 2.81E-05    | -0.475269016 | 3.28E-15    |
| INTS1    | turquoise | 0.24465326   | 0.000109371 | 0.686321881  | 1.85E-35    |
| IPO5     | turquoise | -0.211487706 | 0.000864924 | -0.620370717 | 1.88E-27    |
| IRF7     | turquoise | 0.196749264  | 0.001973688 | 0.576080116  | 4.63E-23    |
| ISCA1    | turquoise | -0.373035603 | 1.66E-09    | -0.651779493 | 5.11E-31    |
| ISCU     | turquoise | -0.326095259 | 1.77E-07    | -0.717778668 | 4.43E-40    |
| ISG20    | turquoise | 0.210503925  | 0.000915504 | 0.404500698  | 4.63E-11    |
| ISYNA1   | turquoise | 0.246661766  | 9.56E-05    | 0.347540808  | 2.31E-08    |
| ITFG1    | turquoise | -0.331835676 | 1.04E-07    | -0.825526385 | 2.63E-62    |
| ITGA10   | turquoise | 0.479049013  | 1.85E-15    | 0.524406823  | 1.04E-18    |
| ITGA5    | turquoise | 0.253585128  | 5.95E-05    | 0.300184209  | 1.71E-06    |
| ITGA8    | turquoise | 0.317674733  | 3.79E-07    | 0.439111077  | 5.70E-13    |
| ITGB1    | turquoise | 0.438351686  | 6.31E-13    | 0.557936911  | 1.90E-21    |
| ITGB1BP1 | turquoise | -0.281718651 | 7.53E-06    | -0.478677662 | 1.95E-15    |
| ITGB4    | turquoise | 0.226844799  | 0.000344519 | 0.079589004  | 0.21447124  |
| ITPKB    | turquoise | 0.480502401  | 1.48E-15    | 0.529433321  | 4.21E-19    |
| ITPR1    | turquoise | -0.214174571 | 0.000739608 | -0.640085137 | 1.21E-29    |
| ITPR3    | turquoise | 0.30673938   | 9.82E-07    | 0.669012606  | 3.69E-33    |
| ITPRIP   | turquoise | 0.424378562  | 3.94E-12    | 0.563527685  | 6.20E-22    |
| JAG1     | turquoise | 0.286340759  | 5.24E-06    | 0.460723754  | 2.81E-14    |
| JAZF1    | turquoise | -0.228106268 | 0.000318533 | -0.684937601 | 2.86E-35    |
| KANK1    | turquoise | 0.221434918  | 0.000479911 | 0.29794888   | 2.05E-06    |
| KANK2    | turquoise | 0.434232501  | 1.09E-12    | 0.355649528  | 1.02E-08    |
| KCNA1    | turquoise | -0.172601655 | 0.00676529  | -0.175261967 | 0.005949054 |
| KCNAB1   | turquoise | -0.420731594 | 6.26E-12    | -0.49772388  | 9.68E-17    |
| KCNB2    | turquoise | -0.264087629 | 2.83E-05    | -0.35181043  | 1.51E-08    |
| KCND2    | turquoise | -0.337006489 | 6.41E-08    | -0.353860776 | 1.23E-08    |
| KCNE4    | turquoise | 0.389625194  | 2.63E-10    | 0.265409105  | 2.57E-05    |
| KCNIP4   | turquoise | -0.282083231 | 7.32E-06    | -0.578801435 | 2.60E-23    |
| KCNJ8    | turquoise | 0.322671698  | 2.42E-07    | 0.361405586  | 5.67E-09    |
| KCNK1    | turquoise | -0.273321378 | 1.43E-05    | -0.51820101  | 3.08E-18    |
| KCNN3    | turquoise | 0.351563073  | 1.55E-08    | 0.491968578  | 2.45E-16    |
| KCNV1    | turquoise | -0.355156372 | 1.08E-08    | -0.543406603 | 3.18E-20    |
| KCTD11   | turquoise | 0.137504345  | 0.031436238 | 0.321297843  | 2.74E-07    |
| KIAA0513 | turquoise | -0.430810446 | 1.71E-12    | -0.603716284 | 1.01E-25    |
| KIF1C    | turquoise | 0.288079808  | 4.57E-06    | 0.493493819  | 1.92E-16    |
| KIF3A    | turquoise | -0.288810336 | 4.31E-06    | -0.259130473 | 4.03E-05    |
| KIF5B    | turquoise | 0.373745581  | 1.54E-09    | 0.281608756  | 7.60E-06    |
| KIF6     | turquoise | 0.215307133  | 0.00069199  | 0.168190466  | 0.008340831 |
| KIFAP3   | turquoise | -0.418260305 | 8.55E-12    | -0.555974399 | 2.81E-21    |

|         |           |              |             |              |             |
|---------|-----------|--------------|-------------|--------------|-------------|
| KIT     | turquoise | -0.224274215 | 0.000403681 | -0.349689653 | 1.87E-08    |
| KITLG   | turquoise | -0.205711299 | 0.001203176 | -0.377322946 | 1.04E-09    |
| KLC1    | turquoise | -0.461932724 | 2.36E-14    | -0.462180113 | 2.28E-14    |
| KLF11   | turquoise | 0.189335812  | 0.002926285 | 0.466967349  | 1.13E-14    |
| KLF2    | turquoise | 0.373788629  | 1.53E-09    | 0.529597039  | 4.09E-19    |
| KLF4    | turquoise | 0.264919715  | 2.66E-05    | 0.177458605  | 0.0053428   |
| KLF6    | turquoise | 0.321317983  | 2.74E-07    | 0.385392804  | 4.25E-10    |
| KLHDC2  | turquoise | -0.1187091   | 0.063574257 | -0.308859433 | 8.19E-07    |
| KLHL5   | turquoise | 0.248790649  | 8.27E-05    | 0.25570797   | 5.13E-05    |
| KLHL7   | turquoise | -0.110873739 | 0.083288346 | -0.59699525  | 4.74E-25    |
| KLK7    | turquoise | -0.265707908 | 2.51E-05    | -0.304617717 | 1.18E-06    |
| KPNA1   | turquoise | -0.339676445 | 4.96E-08    | -0.650913311 | 6.50E-31    |
| KRCC1   | turquoise | 0.3263987    | 1.73E-07    | 0.69784509   | 4.40E-37    |
| KTN1    | turquoise | 0.290459399  | 3.78E-06    | 0.269820792  | 1.86E-05    |
| LAMA5   | turquoise | 0.312610828  | 5.92E-07    | 0.615801869  | 5.74E-27    |
| LAMC1   | turquoise | 0.403116246  | 5.46E-11    | 0.555408199  | 3.14E-21    |
| LANCL1  | turquoise | -0.244926448 | 0.00010739  | -0.549518434 | 9.89E-21    |
| LANCL2  | turquoise | -0.240109086 | 0.000147796 | -0.417933029 | 8.91E-12    |
| LAPTM4B | turquoise | -0.188462613 | 0.003062407 | -0.527353401 | 6.12E-19    |
| LAT     | turquoise | 0.199206288  | 0.001726809 | 0.584718908  | 7.26E-24    |
| LATS2   | turquoise | 0.215173392  | 0.000697462 | 0.261231551  | 3.47E-05    |
| LCAT    | turquoise | 0.240150439  | 0.000147395 | 0.480991461  | 1.37E-15    |
| LCP1    | turquoise | 0.317231535  | 3.94E-07    | 0.262503502  | 3.17E-05    |
| LDHA    | turquoise | -0.311457239 | 6.54E-07    | -0.74474239  | 1.42E-44    |
| LDLRAP1 | turquoise | 0.182500629  | 0.004155799 | 0.23449233   | 0.000212743 |
| LEAP2   | turquoise | 0.295432903  | 2.53E-06    | 0.325912678  | 1.80E-07    |
| LEF1    | turquoise | 0.381349516  | 6.68E-10    | 0.462852705  | 2.07E-14    |
| LEPR    | turquoise | 0.154790654  | 0.015304144 | 0.341851513  | 4.03E-08    |
| LFNG    | turquoise | 0.142172825  | 0.026061641 | 0.515489132  | 4.93E-18    |
| LIME1   | turquoise | 0.200273162  | 0.001628677 | 0.720151026  | 1.87E-40    |
| LIMS2   | turquoise | 0.13868618   | 0.029993323 | 0.452252396  | 9.38E-14    |
| LIN7B   | turquoise | -0.317663487 | 3.80E-07    | -0.488147478 | 4.49E-16    |
| LMBR1   | turquoise | -0.228967383 | 0.000301855 | -0.66576182  | 9.59E-33    |
| LNX1    | turquoise | -0.248022658 | 8.72E-05    | -0.47513966  | 3.35E-15    |
| LONRF2  | turquoise | -0.280467551 | 8.30E-06    | -0.363900887 | 4.38E-09    |
| LPAR4   | turquoise | 0.216932023  | 0.000628604 | 0.302693556  | 1.38E-06    |
| LPP     | turquoise | 0.392526167  | 1.89E-10    | 0.618675088  | 2.85E-27    |
| LRFN5   | turquoise | -0.246788119 | 9.48E-05    | -0.501186133 | 5.49E-17    |
| LRMP    | turquoise | -0.08316238  | 0.194531939 | -0.297473436 | 2.14E-06    |
| LRP10   | turquoise | 0.330081603  | 1.23E-07    | 0.426863705  | 2.86E-12    |

|          |           |              |             |              |             |
|----------|-----------|--------------|-------------|--------------|-------------|
| LRP11    | turquoise | -0.274660662 | 1.29E-05    | -0.722957033 | 6.68E-41    |
| LRPAP1   | turquoise | -0.242561628 | 0.000125719 | -0.481959941 | 1.18E-15    |
| LRPPRC   | turquoise | -0.287947192 | 4.62E-06    | -0.508175771 | 1.72E-17    |
| LRRC32   | turquoise | 0.389468257  | 2.68E-10    | 0.577379789  | 3.52E-23    |
| LRRC49   | turquoise | -0.389955318 | 2.54E-10    | -0.440410314 | 4.79E-13    |
| LRRC1    | turquoise | 0.229701503  | 0.000288282 | 0.319792395  | 3.14E-07    |
| LRRTM1   | turquoise | -0.23060598  | 0.00027234  | -0.463807733 | 1.80E-14    |
| LSM14A   | turquoise | 0.344636131  | 3.07E-08    | 0.549571041  | 9.79E-21    |
| LSS      | turquoise | 0.232784894  | 0.000237246 | 0.321754327  | 2.63E-07    |
| LYL1     | turquoise | 0.29139297   | 3.51E-06    | 0.674285151  | 7.63E-34    |
| LZTFL1   | turquoise | -0.314756775 | 4.91E-07    | -0.537345413 | 9.90E-20    |
| LZTS2    | turquoise | 0.11464444   | 0.073260783 | 0.301543268  | 1.52E-06    |
| MACF1    | turquoise | 0.270270629  | 1.80E-05    | 0.418171538  | 8.65E-12    |
| MAD2L1BP | turquoise | -0.252735619 | 6.31E-05    | -0.366424435 | 3.36E-09    |
| MAGED1   | turquoise | -0.323702159 | 2.21E-07    | -0.644900053 | 3.35E-30    |
| MAGEE1   | turquoise | -0.380187636 | 7.60E-10    | -0.550696181 | 7.88E-21    |
| MAGEH1   | turquoise | -0.311249857 | 6.66E-07    | -0.56679982  | 3.19E-22    |
| MAK16    | turquoise | -0.168178154 | 0.008345651 | -0.325308153 | 1.91E-07    |
| MAL2     | turquoise | -0.349279277 | 1.94E-08    | -0.664864061 | 1.25E-32    |
| MAN1C1   | turquoise | -0.115767606 | 0.070471304 | -0.441948868 | 3.89E-13    |
| MAP1B    | turquoise | -0.213756732 | 0.000757926 | -0.505732189 | 2.59E-17    |
| MAP1LC3B | turquoise | -0.209393155 | 0.00097588  | -0.501885829 | 4.90E-17    |
| MAP2     | turquoise | -0.175289114 | 0.0059412   | -0.199920026 | 0.001660579 |
| MAP2K1   | turquoise | -0.296762254 | 2.26E-06    | -0.751225517 | 9.73E-46    |
| MAP2K4   | turquoise | -0.259068797 | 4.05E-05    | -0.69488275  | 1.17E-36    |
| MAP3K11  | turquoise | 0.12005363   | 0.060611589 | 0.406161444  | 3.79E-11    |
| MAP3K5   | turquoise | 0.344260117  | 3.18E-08    | 0.543520096  | 3.11E-20    |
| MAP3K6   | turquoise | 0.376322553  | 1.16E-09    | 0.643306419  | 5.15E-30    |
| MAP4     | turquoise | -0.254364768 | 5.64E-05    | -0.613580896 | 9.82E-27    |
| MAPK1    | turquoise | -0.249504043 | 7.88E-05    | -0.338362603 | 5.63E-08    |
| MAPK10   | turquoise | -0.363726505 | 4.46E-09    | -0.663482767 | 1.86E-32    |
| MAPK6    | turquoise | -0.30054735  | 1.66E-06    | -0.64371064  | 4.62E-30    |
| MAPK9    | turquoise | -0.329604144 | 1.28E-07    | -0.720348135 | 1.74E-40    |
| MAPKAPK2 | turquoise | 0.323176768  | 2.31E-07    | 0.495717217  | 1.34E-16    |
| MAT2B    | turquoise | -0.375853967 | 1.22E-09    | -0.563689523 | 6.00E-22    |
| MATR3    | turquoise | -0.381313818 | 6.71E-10    | -0.53521223  | 1.47E-19    |
| MCF2     | turquoise | -0.235202006 | 0.000203271 | -0.308188048 | 8.68E-07    |
| MCL1     | turquoise | 0.396595355  | 1.18E-10    | 0.634561538  | 5.17E-29    |
| MCM7     | turquoise | 0.471822701  | 5.51E-15    | 0.648965707  | 1.11E-30    |
| MDH2     | turquoise | -0.395302539 | 1.37E-10    | -0.650893829 | 6.53E-31    |



|          |           |              |             |              |             |
|----------|-----------|--------------|-------------|--------------|-------------|
| MDM2     | turquoise | 0.284866091  | 5.89E-06    | 0.480329673  | 1.52E-15    |
| ME1      | turquoise | -0.237684148 | 0.00017315  | -0.499608485 | 7.12E-17    |
| ME3      | turquoise | -0.178789148 | 0.00500313  | -0.457512126 | 4.46E-14    |
| MED10    | turquoise | -0.28571898  | 5.51E-06    | -0.38282931  | 5.67E-10    |
| MED16    | turquoise | 0.309910818  | 7.48E-07    | 0.480848322  | 1.40E-15    |
| MED31    | turquoise | -0.182751329 | 0.004103526 | -0.322474605 | 2.47E-07    |
| MET      | turquoise | -0.290063641 | 3.90E-06    | -0.332694118 | 9.63E-08    |
| METAP1   | turquoise | -0.303016079 | 1.35E-06    | -0.653477693 | 3.19E-31    |
| METTTL7B | turquoise | 0.263513765  | 2.95E-05    | 0.284814852  | 5.91E-06    |
| MFNG     | turquoise | 0.356966751  | 8.96E-09    | 0.466563863  | 1.20E-14    |
| MFSD6    | turquoise | -0.265018326 | 2.64E-05    | -0.504566202 | 3.14E-17    |
| MGAT1    | turquoise | 0.287152716  | 4.92E-06    | 0.511487718  | 9.80E-18    |
| MGST3    | turquoise | -0.298036703 | 2.04E-06    | -0.549328451 | 1.03E-20    |
| MICALL2  | turquoise | 0.225091397  | 0.000383922 | 0.293348168  | 2.99E-06    |
| MICB     | turquoise | 0.202265427  | 0.001458963 | 0.424569572  | 3.84E-12    |
| MID1IP1  | turquoise | 0.457885903  | 4.23E-14    | 0.615444042  | 6.26E-27    |
| MKKS     | turquoise | -0.273273159 | 1.44E-05    | -0.215600688 | 0.000680119 |
| MKMK2    | turquoise | 0.262626892  | 3.14E-05    | 0.699395366  | 2.63E-37    |
| MLEC     | turquoise | 0.304141931  | 1.22E-06    | 0.151866265  | 0.01737192  |
| MLKL     | turquoise | 0.388036593  | 3.16E-10    | 0.532473643  | 2.43E-19    |
| MLLT6    | turquoise | 0.43326823   | 1.24E-12    | 0.740928361  | 6.65E-44    |
| MMADHC   | turquoise | -0.248380317 | 8.51E-05    | -0.501770368 | 4.99E-17    |
| MMD      | turquoise | -0.279154108 | 9.18E-06    | -0.578235801 | 2.93E-23    |
| MNAT1    | turquoise | -0.111299959 | 0.08210226  | -0.178618159 | 0.005045666 |
| MOAP1    | turquoise | -0.356682553 | 9.22E-09    | -0.749138627 | 2.33E-45    |
| MORF4L2  | turquoise | -0.293080041 | 3.06E-06    | -0.799369117 | 1.11E-55    |
| MOV10    | turquoise | 0.32635587   | 1.73E-07    | 0.345863346  | 2.72E-08    |
| MPP1     | turquoise | -0.264610505 | 2.72E-05    | -0.512525974 | 8.21E-18    |
| MPST     | turquoise | 0.237914323  | 0.000170579 | 0.47269346   | 4.84E-15    |
| MPZL2    | turquoise | 0.210997859  | 0.000889778 | 0.22611736   | 0.000360386 |
| MRAP2    | turquoise | -0.183058763 | 0.004040234 | -0.368132288 | 2.80E-09    |
| MRPL1    | turquoise | -0.355573738 | 1.03E-08    | -0.430420723 | 1.80E-12    |
| MRPL15   | turquoise | -0.355303278 | 1.06E-08    | -0.292665547 | 3.16E-06    |
| MRPL21   | turquoise | -0.320600655 | 2.92E-07    | -0.476081778 | 2.90E-15    |
| MRPL3    | turquoise | -0.256203611 | 4.96E-05    | -0.711782111 | 3.76E-39    |
| MRPL32   | turquoise | -0.251491145 | 6.88E-05    | -0.357445285 | 8.53E-09    |
| MRPL40   | turquoise | -0.209643917 | 0.000961938 | -0.344809704 | 3.02E-08    |
| MRPL47   | turquoise | -0.202506032 | 0.001439602 | -0.225786803 | 0.000367819 |
| MRPS21   | turquoise | -0.251405908 | 6.92E-05    | -0.401292505 | 6.78E-11    |
| MRPS30   | turquoise | -0.450618055 | 1.18E-13    | -0.721614699 | 1.10E-40    |

|         |           |              |             |              |             |
|---------|-----------|--------------|-------------|--------------|-------------|
| MRVI1   | turquoise | 0.281225414  | 7.83E-06    | 0.288509171  | 4.42E-06    |
| MS4A14  | turquoise | 0.371479282  | 1.96E-09    | 0.268173739  | 2.10E-05    |
| MS4A6A  | turquoise | 0.287215731  | 4.89E-06    | 0.170231383  | 0.007575299 |
| MSH2    | turquoise | -0.213620234 | 0.000764    | -0.409139397 | 2.64E-11    |
| MSI2    | turquoise | 0.143852333  | 0.024331442 | 0.358170862  | 7.92E-09    |
| MSN     | turquoise | 0.22695428   | 0.000342188 | 0.256785461  | 4.76E-05    |
| MSRB2   | turquoise | 0.174005934  | 0.006322748 | 0.566954274  | 3.09E-22    |
| MT1E    | turquoise | 0.347547673  | 2.31E-08    | 0.484338345  | 8.16E-16    |
| MT1F    | turquoise | 0.372828974  | 1.70E-09    | 0.408239742  | 2.95E-11    |
| MT1G    | turquoise | 0.29707535   | 2.21E-06    | 0.371216347  | 2.02E-09    |
| MT1H    | turquoise | 0.300485857  | 1.66E-06    | 0.367968116  | 2.85E-09    |
| MT1M    | turquoise | 0.322841173  | 2.39E-07    | 0.417576661  | 9.32E-12    |
| MT1X    | turquoise | 0.207798317  | 0.001068991 | 0.353090354  | 1.33E-08    |
| MT2A    | turquoise | 0.347629296  | 2.29E-08    | 0.403327712  | 5.32E-11    |
| MTCH1   | turquoise | -0.316579237 | 4.18E-07    | -0.580049552 | 1.99E-23    |
| MUC1    | turquoise | 0.372235212  | 1.81E-09    | 0.661364938  | 3.43E-32    |
| MYH10   | turquoise | -0.276749351 | 1.10E-05    | -0.355038093 | 1.09E-08    |
| MYH11   | turquoise | 0.296952062  | 2.23E-06    | 0.255296055  | 5.28E-05    |
| MYOF    | turquoise | 0.247749526  | 8.88E-05    | 0.207916541  | 0.001061818 |
| MYOM1   | turquoise | 0.295224931  | 2.57E-06    | 0.526592766  | 7.02E-19    |
| MYOT    | turquoise | 0.400354868  | 7.58E-11    | 0.486280688  | 6.02E-16    |
| MYT1L   | turquoise | -0.377724071 | 9.97E-10    | -0.665571776 | 1.01E-32    |
| NACC2   | turquoise | 0.435663485  | 9.04E-13    | 0.677264348  | 3.09E-34    |
| NAP1L2  | turquoise | -0.349173502 | 1.96E-08    | -0.614332354 | 8.19E-27    |
| NAP1L3  | turquoise | -0.354412361 | 1.16E-08    | -0.711677689 | 3.90E-39    |
| NAP1L5  | turquoise | -0.462804564 | 2.08E-14    | -0.717740351 | 4.49E-40    |
| NAPB    | turquoise | -0.37802219  | 9.65E-10    | -0.573403846 | 8.13E-23    |
| NAPEPLD | turquoise | -0.253637704 | 5.93E-05    | -0.370622599 | 2.15E-09    |
| NAV2    | turquoise | 0.370673867  | 2.14E-09    | 0.48970275   | 3.51E-16    |
| NAV3    | turquoise | -0.318865888 | 3.41E-07    | -0.580324198 | 1.88E-23    |
| NBEA    | turquoise | -0.316584967 | 4.18E-07    | -0.663015254 | 2.13E-32    |
| NBEAL2  | turquoise | 0.30754698   | 9.17E-07    | 0.497786473  | 9.58E-17    |
| NCAM2   | turquoise | -0.191817016 | 0.00256891  | -0.472044376 | 5.33E-15    |
| NCAPD2  | turquoise | 0.318017014  | 3.68E-07    | 0.411594587  | 1.96E-11    |
| NCKAP1  | turquoise | -0.208473562 | 0.001028614 | -0.774612058 | 2.92E-50    |
| NCOA7   | turquoise | -0.331494494 | 1.08E-07    | -0.696524005 | 6.82E-37    |
| NDE1    | turquoise | 0.255819405  | 5.09E-05    | 0.656641659  | 1.31E-31    |
| NDEL1   | turquoise | -0.375138532 | 1.32E-09    | -0.424099189 | 4.08E-12    |
| NDFIP1  | turquoise | -0.368967969 | 2.57E-09    | -0.665346714 | 1.08E-32    |
| NDFIP2  | turquoise | -0.350410933 | 1.74E-08    | -0.636922093 | 2.80E-29    |

|          |           |              |             |              |             |
|----------|-----------|--------------|-------------|--------------|-------------|
| NDN      | turquoise | -0.187192704 | 0.003270627 | -0.411863746 | 1.89E-11    |
| NDRG3    | turquoise | -0.283265309 | 6.68E-06    | -0.560350675 | 1.18E-21    |
| NDRG4    | turquoise | -0.417820454 | 9.04E-12    | -0.70819413  | 1.32E-38    |
| NDUFA1   | turquoise | -0.223858477 | 0.000414092 | -0.519167279 | 2.61E-18    |
| NDUFA12  | turquoise | -0.207404058 | 0.001093235 | -0.537813411 | 9.08E-20    |
| NDUFA4   | turquoise | -0.245413713 | 0.000103939 | -0.629411875 | 1.95E-28    |
| NDUFA7   | turquoise | -0.112753541 | 0.07815926  | -0.079692619 | 0.213873195 |
| NDUFA9   | turquoise | -0.254536441 | 5.57E-05    | -0.357023537 | 8.91E-09    |
| NDUFAB1  | turquoise | -0.409375785 | 2.57E-11    | -0.621505768 | 1.42E-27    |
| NDUFB5   | turquoise | -0.37387278  | 1.52E-09    | -0.518778178 | 2.79E-18    |
| NDUFB6   | turquoise | -0.275083515 | 1.25E-05    | -0.619331707 | 2.42E-27    |
| NDUFS5   | turquoise | -0.152966938 | 0.016566709 | -0.409047999 | 2.67E-11    |
| NECAB1   | turquoise | -0.207336357 | 0.001097448 | -0.500092793 | 6.57E-17    |
| NECAP1   | turquoise | -0.337666534 | 6.02E-08    | -0.67764334  | 2.75E-34    |
| NECAP2   | turquoise | 0.337959447  | 5.85E-08    | 0.50204774   | 4.77E-17    |
| NEDD4L   | turquoise | -0.279669471 | 8.82E-06    | -0.224118059 | 0.000407563 |
| NEDD8    | turquoise | -0.370893539 | 2.09E-09    | -0.381998451 | 6.22E-10    |
| NEFH     | turquoise | -0.109722952 | 0.08655976  | -0.301714048 | 1.50E-06    |
| NEFM     | turquoise | -0.358267926 | 7.84E-09    | -0.653355891 | 3.30E-31    |
| NEK6     | turquoise | 0.332374898  | 9.92E-08    | 0.58740429   | 4.04E-24    |
| NELL1    | turquoise | -0.282101491 | 7.31E-06    | -0.623175578 | 9.37E-28    |
| NELL2    | turquoise | -0.308741879 | 8.27E-07    | -0.682867929 | 5.47E-35    |
| NES      | turquoise | 0.256612036  | 4.82E-05    | 0.360949459  | 5.95E-09    |
| NET1     | turquoise | 0.18136401   | 0.004400404 | 0.329731259  | 1.27E-07    |
| NETO2    | turquoise | -0.271729499 | 1.61E-05    | -0.431005986 | 1.67E-12    |
| NEU4     | turquoise | 0.100951671  | 0.115004695 | 0.430973091  | 1.68E-12    |
| NEUROD6  | turquoise | -0.322756612 | 2.40E-07    | -0.494555933 | 1.62E-16    |
| NFATC2IP | turquoise | 0.223226559  | 0.000430394 | 0.715314334  | 1.07E-39    |
| NFIA     | turquoise | 0.364778485  | 3.99E-09    | 0.398769929  | 9.13E-11    |
| NFIB     | turquoise | 0.381767441  | 6.38E-10    | 0.421867672  | 5.42E-12    |
| NFKB1    | turquoise | 0.477794705  | 2.24E-15    | 0.582113097  | 1.28E-23    |
| NFKBIA   | turquoise | 0.479714683  | 1.67E-15    | 0.604886612  | 7.71E-26    |
| NFKBIZ   | turquoise | 0.350188317  | 1.77E-08    | 0.485020348  | 7.33E-16    |
| NGRN     | turquoise | -0.307847414 | 8.93E-07    | -0.519387988 | 2.51E-18    |
| NIF3L1   | turquoise | -0.290622374 | 3.73E-06    | -0.557675945 | 2.00E-21    |
| NINJ1    | turquoise | 0.494712217  | 1.58E-16    | 0.50372225   | 3.61E-17    |
| NIPBL    | turquoise | 0.487112266  | 5.28E-16    | 0.734950845  | 7.05E-43    |
| NKIRAS1  | turquoise | -0.285214236 | 5.73E-06    | -0.516532834 | 4.12E-18    |
| NKRF     | turquoise | -0.18330312  | 0.003990557 | -0.277340153 | 1.05E-05    |
| NLK      | turquoise | -0.324555512 | 2.04E-07    | -0.323854536 | 2.18E-07    |

|         |           |              |             |              |             |
|---------|-----------|--------------|-------------|--------------|-------------|
| NME1    | turquoise | -0.367217013 | 3.09E-09    | -0.657527306 | 1.02E-31    |
| NME3    | turquoise | 0.280279899  | 8.42E-06    | 0.588184634  | 3.40E-24    |
| NME4    | turquoise | 0.119601053  | 0.061595879 | 0.278522627  | 9.64E-06    |
| NME7    | turquoise | 0.009382903  | 0.883828401 | -0.319350616 | 3.27E-07    |
| NMNAT2  | turquoise | -0.423208139 | 4.57E-12    | -0.596079872 | 5.84E-25    |
| NNAT    | turquoise | -0.292786862 | 3.13E-06    | -0.386083366 | 3.94E-10    |
| NNT     | turquoise | -0.259326782 | 3.98E-05    | -0.635782828 | 3.76E-29    |
| NOSTRIN | turquoise | 0.237524492  | 0.000174955 | 0.327446838  | 1.57E-07    |
| NOTCH2  | turquoise | 0.292212538  | 3.28E-06    | 0.06386778   | 0.319447813 |
| NOTCH4  | turquoise | 0.369444295  | 2.44E-09    | 0.479672912  | 1.68E-15    |
| NOVA1   | turquoise | -0.380478829 | 7.36E-10    | -0.494669415 | 1.59E-16    |
| NPAS3   | turquoise | 0.206668337  | 0.001139832 | 0.366588252  | 3.30E-09    |
| NPTN    | turquoise | -0.387242695 | 3.45E-10    | -0.527511328 | 5.95E-19    |
| NPTX1   | turquoise | -0.30712428  | 9.50E-07    | -0.258939267 | 4.09E-05    |
| NPTX2   | turquoise | -0.440954457 | 4.45E-13    | -0.478763198 | 1.93E-15    |
| NPY     | turquoise | -0.17357992  | 0.006454184 | -0.493915398 | 1.79E-16    |
| NR2F1   | turquoise | 0.26203409   | 3.28E-05    | 0.615756592  | 5.80E-27    |
| NRCAM   | turquoise | -0.219930059 | 0.000525528 | -0.211433023 | 0.000867666 |
| NRN1    | turquoise | -0.479492217 | 1.72E-15    | -0.428780126 | 2.23E-12    |
| NRXN1   | turquoise | -0.359652211 | 6.80E-09    | -0.606971211 | 4.73E-26    |
| NRXN3   | turquoise | -0.383808933 | 5.08E-10    | -0.295040959 | 2.61E-06    |
| NSF     | turquoise | -0.394811206 | 1.45E-10    | -0.612306248 | 1.33E-26    |
| NSL1    | turquoise | 0.25104941   | 7.09E-05    | 0.503046843  | 4.04E-17    |
| NT5DC3  | turquoise | -0.386132009 | 3.92E-10    | -0.510652732 | 1.13E-17    |
| NTNG1   | turquoise | -0.205845794 | 0.001194083 | -0.431906778 | 1.48E-12    |
| NUAK1   | turquoise | -0.359259323 | 7.08E-09    | -0.354326642 | 1.17E-08    |
| NUDT10  | turquoise | -0.235269483 | 0.000202391 | -0.216071245 | 0.000661481 |
| NUDT11  | turquoise | -0.32566106  | 1.85E-07    | -0.625265879 | 5.55E-28    |
| NUDT21  | turquoise | -0.330967167 | 1.13E-07    | -0.66002854  | 5.03E-32    |
| NUDT9   | turquoise | -0.085587238 | 0.181793743 | -0.393105754 | 1.77E-10    |
| NUPR1   | turquoise | 0.358310319  | 7.81E-09    | 0.461025457  | 2.69E-14    |
| NXN     | turquoise | 0.277156916  | 1.07E-05    | 0.485330534  | 6.99E-16    |
| OAT     | turquoise | -0.160333611 | 0.011968805 | -0.668212722 | 4.67E-33    |
| OCA2    | turquoise | -0.109448171 | 0.087355956 | -0.358611883 | 7.57E-09    |
| OCIAD2  | turquoise | -0.235855709 | 0.000194896 | -0.402954138 | 5.56E-11    |
| OLA1    | turquoise | -0.320564878 | 2.93E-07    | -0.466320754 | 1.25E-14    |
| OLFM1   | turquoise | -0.417377284 | 9.55E-12    | -0.483492461 | 9.30E-16    |
| OLFM3   | turquoise | -0.249180381 | 8.06E-05    | -0.613879898 | 9.14E-27    |
| OLFM4   | turquoise | -0.222579075 | 0.000447715 | -0.13586212  | 0.033539202 |
| OLIG1   | turquoise | 0.27420138   | 1.34E-05    | 0.455456359  | 5.97E-14    |

|          |           |              |             |              |             |
|----------|-----------|--------------|-------------|--------------|-------------|
| OPA1     | turquoise | -0.314047249 | 5.22E-07    | -0.688028095 | 1.07E-35    |
| OPCML    | turquoise | -0.352240254 | 1.45E-08    | -0.466266054 | 1.26E-14    |
| OPN3     | turquoise | -0.229981299 | 0.00028326  | -0.630285244 | 1.56E-28    |
| OPTN     | turquoise | -0.207457558 | 0.001089915 | -0.554697014 | 3.61E-21    |
| OR2L13   | turquoise | -0.243865527 | 0.000115279 | -0.339920754 | 4.85E-08    |
| OSBPL10  | turquoise | -0.257942939 | 4.39E-05    | -0.563868463 | 5.79E-22    |
| OSTF1    | turquoise | -0.161602349 | 0.011302213 | -0.530462428 | 3.50E-19    |
| OTOS     | turquoise | 0.284458293  | 6.08E-06    | 0.230845284  | 0.000268262 |
| OXCT1    | turquoise | -0.169258793 | 0.007931935 | -0.57189375  | 1.11E-22    |
| OXR1     | turquoise | -0.282966968 | 6.83E-06    | -0.637492239 | 2.41E-29    |
| PAC SIN1 | turquoise | -0.357412648 | 8.56E-09    | -0.270015706 | 1.83E-05    |
| PAC SIN3 | turquoise | 0.295948342  | 2.42E-06    | 0.343424824  | 3.46E-08    |
| PAIP2    | turquoise | -0.234784765 | 0.000208791 | -0.77805769  | 5.66E-51    |
| PAK1     | turquoise | -0.425181094 | 3.55E-12    | -0.630813811 | 1.36E-28    |
| PAM      | turquoise | -0.22918496  | 0.000297771 | -0.525249435 | 8.92E-19    |
| PAPSS1   | turquoise | -0.213855028 | 0.000753579 | -0.147690891 | 0.020744516 |
| PARP10   | turquoise | 0.332386899  | 9.91E-08    | 0.75159249   | 8.34E-46    |
| PARP14   | turquoise | 0.335881618  | 7.13E-08    | 0.42338296   | 4.47E-12    |
| PARP4    | turquoise | 0.364454383  | 4.13E-09    | 0.35133223   | 1.58E-08    |
| PARP9    | turquoise | 0.324252293  | 2.10E-07    | 0.288553661  | 4.40E-06    |
| PARVG    | turquoise | 0.28760128   | 4.75E-06    | 0.267731056  | 2.17E-05    |
| PAX6     | turquoise | 0.251645896  | 6.80E-05    | 0.341506726  | 4.16E-08    |
| PBXIP1   | turquoise | 0.196509186  | 0.00199946  | 0.29646867   | 2.32E-06    |
| PCDH17   | turquoise | 0.210888435  | 0.000895419 | 0.577811519  | 3.21E-23    |
| PCDH8    | turquoise | -0.237653936 | 0.00017349  | -0.52403392  | 1.11E-18    |
| PCLO     | turquoise | -0.33599712  | 7.05E-08    | -0.580373651 | 1.86E-23    |
| PCMT1    | turquoise | -0.364694565 | 4.03E-09    | -0.582036365 | 1.30E-23    |
| PCP4     | turquoise | -0.359346    | 7.02E-09    | -0.174425868 | 0.006195536 |
| PCSK1    | turquoise | -0.465003042 | 1.51E-14    | -0.480483354 | 1.48E-15    |
| PCSK2    | turquoise | -0.24017681  | 0.000147141 | -0.403634288 | 5.13E-11    |
| PCSK5    | turquoise | 0.250694117  | 7.26E-05    | 0.423012536  | 4.69E-12    |
| PCYOX1L  | turquoise | -0.419597346 | 7.23E-12    | -0.484622428 | 7.80E-16    |
| PDCD6IP  | turquoise | -0.125837096 | 0.049135204 | -0.440964053 | 4.44E-13    |
| PDE5A    | turquoise | 0.366116192  | 3.47E-09    | 0.499615776  | 7.11E-17    |
| PDE9A    | turquoise | 0.329587962  | 1.29E-07    | 0.68675427   | 1.61E-35    |
| PDGFRB   | turquoise | 0.484899438  | 7.47E-16    | 0.617125049  | 4.16E-27    |
| PDHB     | turquoise | -0.349816591 | 1.84E-08    | -0.603439174 | 1.08E-25    |
| PDHX     | turquoise | -0.285598861 | 5.56E-06    | -0.676893441 | 3.46E-34    |
| PDPK1    | turquoise | -0.231904051 | 0.000250892 | -0.448653472 | 1.55E-13    |
| PDPN     | turquoise | 0.277443055  | 1.05E-05    | 0.38011673   | 7.66E-10    |

|         |           |              |             |              |             |
|---------|-----------|--------------|-------------|--------------|-------------|
| PECAM1  | turquoise | 0.232140928  | 0.000247152 | 0.137737945  | 0.031146431 |
| PFKFB4  | turquoise | 0.344433802  | 3.13E-08    | 0.554702804  | 3.60E-21    |
| PFKM    | turquoise | -0.241323015 | 0.000136451 | -0.430022146 | 1.90E-12    |
| PFN2    | turquoise | -0.458569321 | 3.83E-14    | -0.777967475 | 5.91E-51    |
| PGBD5   | turquoise | -0.214362348 | 0.000731509 | -0.491127131 | 2.80E-16    |
| PGRMC1  | turquoise | -0.356259313 | 9.63E-09    | -0.69177251  | 3.22E-36    |
| PHF14   | turquoise | -0.321900868 | 2.60E-07    | -0.763742151 | 4.29E-48    |
| PHF19   | turquoise | 0.367603728  | 2.96E-09    | 0.577489466  | 3.43E-23    |
| PHF2    | turquoise | 0.263815828  | 2.88E-05    | 0.497556746  | 9.95E-17    |
| PHKA2   | turquoise | 0.241476421  | 0.000135076 | 0.72481414   | 3.35E-41    |
| PHYHD1  | turquoise | 0.323728989  | 2.20E-07    | 0.239557377  | 0.000153239 |
| PI16    | turquoise | 0.242255976  | 0.000128291 | 0.423257261  | 4.55E-12    |
| PID1    | turquoise | -0.175784924 | 0.005799386 | -0.618699833 | 2.83E-27    |
| PIGO    | turquoise | 0.299186006  | 1.85E-06    | 0.314190203  | 5.16E-07    |
| PIGQ    | turquoise | 0.157410469  | 0.013637972 | 0.590176063  | 2.19E-24    |
| PIK3CB  | turquoise | -0.195368681 | 0.00212614  | -0.62588806  | 4.75E-28    |
| PIM1    | turquoise | 0.200901756  | 0.001573274 | 0.263813536  | 2.88E-05    |
| PITPNB  | turquoise | -0.337565488 | 6.08E-08    | -0.509043605 | 1.48E-17    |
| PJA1    | turquoise | -0.347062876 | 2.42E-08    | -0.640578156 | 1.07E-29    |
| PJA2    | turquoise | -0.350581943 | 1.71E-08    | -0.536269212 | 1.21E-19    |
| PKIA    | turquoise | -0.414413579 | 1.38E-11    | -0.440862767 | 4.50E-13    |
| PKN2    | turquoise | 0.388003047  | 3.17E-10    | 0.617579892  | 3.72E-27    |
| PLA1A   | turquoise | 0.243619738  | 0.000117183 | 0.304490258  | 1.19E-06    |
| PLCD1   | turquoise | 0.264372775  | 2.77E-05    | 0.267734734  | 2.17E-05    |
| PLCD3   | turquoise | 0.247782433  | 8.86E-05    | 0.345800534  | 2.74E-08    |
| PLCE1   | turquoise | 0.500603829  | 6.05E-17    | 0.404634099  | 4.55E-11    |
| PLCG1   | turquoise | 0.371743929  | 1.91E-09    | 0.69867826   | 3.34E-37    |
| PLCG2   | turquoise | 0.269776017  | 1.86E-05    | 0.241605359  | 0.000133931 |
| PLCL2   | turquoise | -0.334530096 | 8.10E-08    | -0.475803338 | 3.03E-15    |
| PLEKHA7 | turquoise | 0.355720571  | 1.02E-08    | 0.296205771  | 2.37E-06    |
| PLEKHB1 | turquoise | 0.14276229   | 0.025442714 | 0.190456638  | 0.002759609 |
| PLEKHH3 | turquoise | 0.241228404  | 0.000137305 | 0.609211659  | 2.79E-26    |
| PLEKHO2 | turquoise | 0.359746007  | 6.74E-09    | 0.500748654  | 5.90E-17    |
| PLK2    | turquoise | -0.386787075 | 3.64E-10    | -0.356215874 | 9.67E-09    |
| PLOD1   | turquoise | 0.334340253  | 8.25E-08    | 0.819714462  | 9.63E-61    |
| PLSCR3  | turquoise | 0.160537065  | 0.011859632 | 0.465327864  | 1.44E-14    |
| PML     | turquoise | 0.289230157  | 4.17E-06    | 0.382773179  | 5.70E-10    |
| PMPCB   | turquoise | -0.246328747 | 9.77E-05    | -0.462778037 | 2.09E-14    |
| PNMA1   | turquoise | -0.312664949 | 5.89E-07    | -0.739946646 | 9.85E-44    |
| PNMA2   | turquoise | -0.283266621 | 6.68E-06    | -0.626527885 | 4.04E-28    |

|          |           |              |             |              |             |
|----------|-----------|--------------|-------------|--------------|-------------|
| POGK     | turquoise | 0.440342587  | 4.83E-13    | 0.557292179  | 2.16E-21    |
| POLA1    | turquoise | 0.45918824   | 3.51E-14    | 0.462133142  | 2.29E-14    |
| POLR3C   | turquoise | -0.207599657 | 0.001081144 | -0.385647764 | 4.13E-10    |
| POLR3H   | turquoise | 0.438989874  | 5.80E-13    | 0.576324256  | 4.40E-23    |
| POP7     | turquoise | -0.209975182 | 0.000943802 | -0.478213779 | 2.10E-15    |
| POU2F1   | turquoise | 0.29976913   | 1.77E-06    | 0.632374338  | 9.11E-29    |
| PPA1     | turquoise | -0.272267049 | 1.55E-05    | -0.699673661 | 2.39E-37    |
| PPEF1    | turquoise | -0.337135964 | 6.33E-08    | -0.342625715 | 3.73E-08    |
| PPFIA1   | turquoise | 0.456417517  | 5.21E-14    | 0.638047345  | 2.08E-29    |
| PPIA     | turquoise | -0.125374297 | 0.049981398 | -0.426080431 | 3.17E-12    |
| PPM1H    | turquoise | -0.264323525 | 2.78E-05    | -0.38551499  | 4.20E-10    |
| PPP1R14C | turquoise | -0.195421836 | 0.002120077 | -0.305352669 | 1.11E-06    |
| PPP1R1A  | turquoise | 0.328376369  | 1.44E-07    | 0.363442568  | 4.59E-09    |
| PPP1R2   | turquoise | -0.295575168 | 2.50E-06    | -0.662108845 | 2.77E-32    |
| PPP2CA   | turquoise | -0.271244479 | 1.67E-05    | -0.386276079 | 3.85E-10    |
| PPP2R1B  | turquoise | 0.257124292  | 4.65E-05    | 0.308367152  | 8.54E-07    |
| PPP2R2B  | turquoise | -0.35211278  | 1.46E-08    | -0.60326318  | 1.13E-25    |
| PPP3CA   | turquoise | -0.36474264  | 4.01E-09    | -0.504130364 | 3.38E-17    |
| PPP3CB   | turquoise | -0.353887806 | 1.22E-08    | -0.611494339 | 1.62E-26    |
| PPP3R1   | turquoise | -0.323997653 | 2.15E-07    | -0.3921006   | 1.98E-10    |
| PPP4R4   | turquoise | -0.193633851 | 0.002332902 | -0.525281243 | 8.87E-19    |
| PPT1     | turquoise | -0.316057413 | 4.37E-07    | -0.315346043 | 4.66E-07    |
| PRDM2    | turquoise | -0.21680725  | 0.000633274 | -0.159330759 | 0.012519969 |
| PRDX3    | turquoise | -0.094492517 | 0.140271786 | -0.618324506 | 3.10E-27    |
| PREP     | turquoise | -0.206018675 | 0.001182488 | -0.475629472 | 3.11E-15    |
| PREPL    | turquoise | -0.359391025 | 6.99E-09    | -0.533374858 | 2.06E-19    |
| PREX1    | turquoise | 0.212600204  | 0.000810835 | 0.359011216  | 7.27E-09    |
| PRKACB   | turquoise | -0.320093005 | 3.06E-07    | -0.662340902 | 2.59E-32    |
| PRKCB    | turquoise | -0.352311984 | 1.43E-08    | -0.705155639 | 3.75E-38    |
| PRKCE    | turquoise | -0.265654106 | 2.52E-05    | -0.4594116   | 3.40E-14    |
| PRKX     | turquoise | 0.433422061  | 1.22E-12    | 0.469370114  | 7.94E-15    |
| PRMT6    | turquoise | -0.223766787 | 0.000416421 | -0.497123373 | 1.07E-16    |
| PRMT8    | turquoise | -0.328194964 | 1.46E-07    | -0.139773523 | 0.028716125 |
| PRNP     | turquoise | -0.350919748 | 1.65E-08    | -0.558472086 | 1.71E-21    |
| PRPS1    | turquoise | -0.341594663 | 4.13E-08    | -0.714267338 | 1.56E-39    |
| PRPS2    | turquoise | -0.192855417 | 0.002431494 | -0.319949789 | 3.10E-07    |
| PSMA1    | turquoise | -0.22894975  | 0.000302188 | -0.646043149 | 2.46E-30    |
| PSMA3    | turquoise | -0.283258226 | 6.68E-06    | -0.69421906  | 1.45E-36    |
| PSMA5    | turquoise | -0.279203047 | 9.15E-06    | -0.524730812 | 9.78E-19    |
| PSMB2    | turquoise | -0.362787415 | 4.92E-09    | -0.491980203 | 2.44E-16    |

|          |           |              |             |              |             |
|----------|-----------|--------------|-------------|--------------|-------------|
| PSMC2    | turquoise | -0.197130511 | 0.001933382 | -0.595731591 | 6.32E-25    |
| PSMD1    | turquoise | -0.328845783 | 1.38E-07    | -0.633206963 | 7.35E-29    |
| PSMD10   | turquoise | -0.316538161 | 4.19E-07    | -0.638391225 | 1.90E-29    |
| PSMD14   | turquoise | -0.362374141 | 5.13E-09    | -0.737643125 | 2.45E-43    |
| PSMD6    | turquoise | -0.198081922 | 0.001836053 | -0.534815514 | 1.58E-19    |
| PSMG1    | turquoise | -0.30686705  | 9.71E-07    | -0.721273077 | 1.24E-40    |
| PTBP1    | turquoise | 0.426855855  | 2.86E-12    | 0.767430608  | 8.14E-49    |
| PTDSS1   | turquoise | -0.25886806  | 4.11E-05    | -0.570256942 | 1.56E-22    |
| PTDSS2   | turquoise | 0.2041505    | 0.001313451 | 0.507838656  | 1.82E-17    |
| PTH1R    | turquoise | 0.311897019  | 6.30E-07    | 0.78277095   | 5.72E-52    |
| PTH2R    | turquoise | -0.300284719 | 1.69E-06    | -0.421504168 | 5.68E-12    |
| PTPN3    | turquoise | -0.302124425 | 1.45E-06    | -0.32226373  | 2.51E-07    |
| PTPRN2   | turquoise | -0.310203274 | 7.29E-07    | -0.697116139 | 5.60E-37    |
| PTPRT    | turquoise | -0.12309303  | 0.054331888 | -0.426299666 | 3.08E-12    |
| PTRH2    | turquoise | -0.27781119  | 1.02E-05    | -0.358024583 | 8.04E-09    |
| PTTG1    | turquoise | -0.155544107 | 0.014807616 | -0.129465568 | 0.042906207 |
| PUM2     | turquoise | -0.153307608 | 0.01632418  | -0.501078012 | 5.59E-17    |
| PXN      | turquoise | 0.226696277  | 0.000347705 | 0.390724125  | 2.32E-10    |
| PYGM     | turquoise | 0.313123708  | 5.66E-07    | 0.230280559  | 0.000277979 |
| QKI      | turquoise | 0.226845178  | 0.000344511 | 0.223999752  | 0.000410526 |
| QPCT     | turquoise | -0.288301823 | 4.49E-06    | -0.695694967 | 8.96E-37    |
| R3HDM1   | turquoise | -0.347303927 | 2.36E-08    | -0.444330957 | 2.81E-13    |
| RAB11A   | turquoise | -0.320625946 | 2.91E-07    | -0.421935754 | 5.38E-12    |
| RAB15    | turquoise | -0.255878524 | 5.07E-05    | -0.340931473 | 4.40E-08    |
| RAB22A   | turquoise | -0.25141357  | 6.91E-05    | -0.44388473  | 2.99E-13    |
| RAB2A    | turquoise | -0.270345902 | 1.79E-05    | -0.563243751 | 6.57E-22    |
| RAB6A    | turquoise | -0.400634115 | 7.33E-11    | -0.718973293 | 2.87E-40    |
| RAB6B    | turquoise | -0.233632672 | 0.000224768 | -0.28711059  | 4.93E-06    |
| RAD23B   | turquoise | -0.178896284 | 0.004976642 | -0.610056843 | 2.28E-26    |
| RAD51C   | turquoise | -0.303357159 | 1.31E-06    | -0.61795555  | 3.40E-27    |
| RAI14    | turquoise | 0.295976048  | 2.42E-06    | 0.45395389   | 7.39E-14    |
| RALB     | turquoise | -0.187988007 | 0.003138777 | -0.500042867 | 6.63E-17    |
| RALGDS   | turquoise | 0.30826579   | 8.62E-07    | 0.494789925  | 1.56E-16    |
| RALYL    | turquoise | -0.315239989 | 4.70E-07    | -0.476022493 | 2.93E-15    |
| RAP1GDS1 | turquoise | -0.31127698  | 6.65E-07    | -0.729603968 | 5.53E-42    |
| RAP2A    | turquoise | -0.302658933 | 1.39E-06    | -0.517845175 | 3.28E-18    |
| RAPGEF1  | turquoise | 0.244366407  | 0.000111489 | 0.569628917  | 1.78E-22    |
| RAPGEF2  | turquoise | -0.271150396 | 1.68E-05    | -0.500570475 | 6.08E-17    |
| RARRES2  | turquoise | 0.286264258  | 5.28E-06    | 0.439153039  | 5.67E-13    |
| RASA1    | turquoise | -0.179218025 | 0.004897854 | -0.581469736 | 1.47E-23    |



|         |           |              |             |              |             |
|---------|-----------|--------------|-------------|--------------|-------------|
| RASAL3  | turquoise | 0.302359572  | 1.42E-06    | 0.595376041  | 6.84E-25    |
| RASD1   | turquoise | -0.022710889 | 0.723556743 | -0.210200979 | 0.00093162  |
| RASGRF1 | turquoise | -0.374742067 | 1.38E-09    | -0.239216826 | 0.000156691 |
| RASGRP1 | turquoise | -0.36022999  | 6.41E-09    | -0.308130957 | 8.72E-07    |
| RASL11B | turquoise | -0.286184352 | 5.31E-06    | -0.561648189 | 9.06E-22    |
| RASL12  | turquoise | 0.405230285  | 4.24E-11    | 0.508540053  | 1.61E-17    |
| RASSF1  | turquoise | 0.353458357  | 1.28E-08    | 0.385568461  | 4.17E-10    |
| RASSF4  | turquoise | 0.327763447  | 1.52E-07    | 0.522905719  | 1.35E-18    |
| RBM11   | turquoise | -0.232467923 | 0.000242074 | -0.523659368 | 1.18E-18    |
| RBM17   | turquoise | 0.399051138  | 8.84E-11    | 0.592483019  | 1.31E-24    |
| RBMS2   | turquoise | 0.180585831  | 0.004575272 | 0.344103146  | 3.23E-08    |
| RBP4    | turquoise | -0.189432276 | 0.002911589 | -0.424929583 | 3.67E-12    |
| RBPJ    | turquoise | 0.465560072  | 1.39E-14    | 0.575441224  | 5.30E-23    |
| RCAN2   | turquoise | -0.408734162 | 2.77E-11    | -0.621069211 | 1.58E-27    |
| RDH5    | turquoise | 0.230417538  | 0.000275592 | 0.442293506  | 3.71E-13    |
| REEP1   | turquoise | -0.346973914 | 2.44E-08    | -0.505998408 | 2.47E-17    |
| REEP5   | turquoise | -0.300707767 | 1.63E-06    | -0.494057467 | 1.75E-16    |
| RELL1   | turquoise | 0.163241241  | 0.010489756 | 0.337508817  | 6.11E-08    |
| REPS2   | turquoise | -0.261150915 | 3.49E-05    | -0.672563923 | 1.28E-33    |
| REST    | turquoise | 0.335863285  | 7.14E-08    | 0.283061848  | 6.78E-06    |
| RFTN1   | turquoise | -0.31404872  | 5.22E-07    | -0.27710545  | 1.07E-05    |
| RFX2    | turquoise | 0.384616755  | 4.64E-10    | 0.342100514  | 3.93E-08    |
| RGL2    | turquoise | 0.373982351  | 1.50E-09    | 0.459295725  | 3.45E-14    |
| RGMA    | turquoise | 0.274904939  | 1.27E-05    | 0.322962147  | 2.36E-07    |
| RGR     | turquoise | 0.336402379  | 6.79E-08    | 0.184112997  | 0.003829827 |
| RGS2    | turquoise | -0.194637366 | 0.002211174 | -0.102532483 | 0.109398701 |
| RGS4    | turquoise | -0.378809496 | 8.85E-10    | -0.664242016 | 1.49E-32    |
| RGS7    | turquoise | -0.443948158 | 2.96E-13    | -0.697200582 | 5.45E-37    |
| RHBDF1  | turquoise | 0.37479995   | 1.37E-09    | 0.689185308  | 7.42E-36    |
| RHBDF2  | turquoise | 0.379081814  | 8.59E-10    | 0.530406208  | 3.53E-19    |
| RHOC    | turquoise | 0.29623298   | 2.37E-06    | 0.451604014  | 1.03E-13    |
| RIMBP2  | turquoise | -0.271455871 | 1.64E-05    | -0.505040052 | 2.90E-17    |
| RIMS1   | turquoise | -0.326382992 | 1.73E-07    | -0.345256823 | 2.89E-08    |
| RIN3    | turquoise | 0.213109162  | 0.000787145 | 0.117878854  | 0.065462359 |
| RIPPLY2 | turquoise | -0.23451726  | 0.000212403 | -0.347362666 | 2.35E-08    |
| RIT2    | turquoise | -0.223720281 | 0.000417607 | -0.359532561 | 6.89E-09    |
| RND2    | turquoise | 0.301837565  | 1.49E-06    | 0.390762968  | 2.31E-10    |
| RNF135  | turquoise | 0.231562238  | 0.000256382 | 0.425076389  | 3.60E-12    |
| RNF144B | turquoise | 0.370520367  | 2.17E-09    | 0.277941347  | 1.01E-05    |
| RNF175  | turquoise | -0.346937661 | 2.45E-08    | -0.485911273 | 6.38E-16    |

|         |           |              |             |              |             |
|---------|-----------|--------------|-------------|--------------|-------------|
| RNF41   | turquoise | -0.283939395 | 6.33E-06    | -0.657906946 | 9.19E-32    |
| RNFT2   | turquoise | -0.399027287 | 8.86E-11    | -0.409231782 | 2.61E-11    |
| ROBO3   | turquoise | 0.153162534  | 0.01642708  | 0.452248384  | 9.39E-14    |
| RPA3    | turquoise | -0.257358608 | 4.57E-05    | -0.559205463 | 1.48E-21    |
| RPAIN   | turquoise | -0.273415006 | 1.42E-05    | -0.406555457 | 3.61E-11    |
| RPL15   | turquoise | -0.413562919 | 1.54E-11    | -0.795209809 | 1.01E-54    |
| RPN2    | turquoise | 0.256793258  | 4.76E-05    | 0.716698768  | 6.53E-40    |
| RPP40   | turquoise | -0.308387045 | 8.53E-07    | -0.250329319 | 7.45E-05    |
| RPS6KA1 | turquoise | 0.244910195  | 0.000107507 | 0.441405711  | 4.18E-13    |
| RRAGA   | turquoise | -0.394731858 | 1.46E-10    | -0.76812055  | 5.94E-49    |
| RRAGB   | turquoise | -0.284894615 | 5.88E-06    | -0.474994443 | 3.42E-15    |
| RSPO2   | turquoise | -0.26801848  | 2.12E-05    | -0.541774739 | 4.33E-20    |
| RTN1    | turquoise | -0.445094685 | 2.53E-13    | -0.750065174 | 1.58E-45    |
| RTN3    | turquoise | -0.364607048 | 4.06E-09    | -0.424471546 | 3.89E-12    |
| RTN4    | turquoise | -0.464511969 | 1.62E-14    | -0.765889026 | 1.64E-48    |
| RTN4IP1 | turquoise | -0.277503701 | 1.04E-05    | -0.451075748 | 1.11E-13    |
| RUFY3   | turquoise | -0.321417678 | 2.71E-07    | -0.727886211 | 1.06E-41    |
| RUNDC1  | turquoise | -0.343391309 | 3.47E-08    | -0.566942644 | 3.10E-22    |
| RWDD2A  | turquoise | -0.221900272 | 0.000466565 | -0.438910869 | 5.86E-13    |
| S100A10 | turquoise | 0.279566513  | 8.89E-06    | 0.215206028  | 0.000696123 |
| S100A6  | turquoise | 0.343525907  | 3.42E-08    | 0.423195982  | 4.58E-12    |
| S100PBP | turquoise | 0.30626743   | 1.02E-06    | 0.531165292  | 3.08E-19    |
| SAP30L  | turquoise | 0.409981435  | 2.38E-11    | 0.592671543  | 1.26E-24    |
| SAT1    | turquoise | 0.173328993  | 0.006532739 | 0.24448299   | 0.000110624 |
| SATB2   | turquoise | -0.164638891 | 0.009838141 | -0.380820809 | 7.09E-10    |
| SCAMP1  | turquoise | -0.333264288 | 9.13E-08    | -0.287019413 | 4.97E-06    |
| SCG2    | turquoise | -0.387115822 | 3.50E-10    | -0.593467201 | 1.05E-24    |
| SCG3    | turquoise | -0.426322056 | 3.07E-12    | -0.452129764 | 9.55E-14    |
| SCG5    | turquoise | -0.445007521 | 2.56E-13    | -0.618417674 | 3.03E-27    |
| SCN2B   | turquoise | -0.414993385 | 1.29E-11    | -0.681153508 | 9.33E-35    |
| SCN3B   | turquoise | -0.310015488 | 7.41E-07    | -0.590374687 | 2.10E-24    |
| SCO1    | turquoise | -0.219905563 | 0.000526302 | -0.589779067 | 2.39E-24    |
| SCOC    | turquoise | -0.373466086 | 1.58E-09    | -0.732665957 | 1.71E-42    |
| SDAD1   | turquoise | -0.338985831 | 5.30E-08    | -0.30534061  | 1.11E-06    |
| SDC2    | turquoise | 0.214709797  | 0.00071674  | 0.485665711  | 6.63E-16    |
| SDHA    | turquoise | -0.304870838 | 1.15E-06    | -0.489821888 | 3.45E-16    |
| SDHB    | turquoise | -0.327489775 | 1.56E-07    | -0.641461115 | 8.43E-30    |
| SEC61A2 | turquoise | -0.319787067 | 3.14E-07    | -0.455540076 | 5.90E-14    |
| SEC61G  | turquoise | -0.372196677 | 1.82E-09    | -0.52933357  | 4.29E-19    |
| SEH1L   | turquoise | -0.421190023 | 5.91E-12    | -0.663717367 | 1.74E-32    |

|          |           |              |             |              |             |
|----------|-----------|--------------|-------------|--------------|-------------|
| SELENBP1 | turquoise | 0.354805734  | 1.12E-08    | 0.291992103  | 3.34E-06    |
| SEMA4F   | turquoise | -0.2571756   | 4.63E-05    | -0.526520487 | 7.11E-19    |
| SERINC1  | turquoise | -0.325653392 | 1.85E-07    | -0.744642294 | 1.48E-44    |
| SERPINA3 | turquoise | 0.225683883  | 0.000370162 | 0.134615761  | 0.035214006 |
| SERPINB6 | turquoise | 0.369881039  | 2.33E-09    | 0.660735283  | 4.11E-32    |
| SERPINI1 | turquoise | -0.304243394 | 1.21E-06    | -0.722573002 | 7.70E-41    |
| SERTAD1  | turquoise | 0.241122572  | 0.000138266 | 0.337404612  | 6.17E-08    |
| SEZ6L2   | turquoise | -0.427150413 | 2.76E-12    | -0.271324201 | 1.66E-05    |
| SGIP1    | turquoise | -0.303583873 | 1.28E-06    | -0.604836921 | 7.80E-26    |
| SH3GL2   | turquoise | -0.345118085 | 2.93E-08    | -0.50562045  | 2.63E-17    |
| SH3PXD2A | turquoise | 0.214560642  | 0.000723046 | 0.596924663  | 4.82E-25    |
| SHD      | turquoise | -0.186700642 | 0.003354694 | 0.132664765  | 0.037977883 |
| SIK1     | turquoise | 0.265469376  | 2.56E-05    | 0.200561669  | 0.001603031 |
| SIX5     | turquoise | 0.277840598  | 1.02E-05    | 0.609991604  | 2.32E-26    |
| SKAP2    | turquoise | -0.140055844 | 0.028392224 | -0.5367471   | 1.11E-19    |
| SLBP     | turquoise | -0.297064464 | 2.21E-06    | -0.289103237 | 4.21E-06    |
| SLC11A1  | turquoise | 0.217094992  | 0.000622552 | 0.249324993  | 7.98E-05    |
| SLC12A5  | turquoise | -0.341258332 | 4.26E-08    | -0.629250738 | 2.03E-28    |
| SLC15A3  | turquoise | 0.458975761  | 3.62E-14    | 0.506030122  | 2.46E-17    |
| SLC16A14 | turquoise | -0.417626793 | 9.26E-12    | -0.719399624 | 2.46E-40    |
| SLC16A9  | turquoise | 0.348413119  | 2.12E-08    | 0.518091893  | 3.14E-18    |
| SLC1A1   | turquoise | -0.208735987 | 0.001013304 | -0.435021395 | 9.84E-13    |
| SLC20A1  | turquoise | -0.246101969 | 9.92E-05    | -0.532338283 | 2.49E-19    |
| SLC25A12 | turquoise | -0.265259195 | 2.60E-05    | -0.480373777 | 1.51E-15    |
| SLC25A14 | turquoise | -0.302960465 | 1.35E-06    | -0.20096505  | 0.001567792 |
| SLC25A29 | turquoise | 0.317195924  | 3.96E-07    | 0.502667313  | 4.30E-17    |
| SLC25A3  | turquoise | -0.345298288 | 2.88E-08    | -0.597193536 | 4.54E-25    |
| SLC25A34 | turquoise | 0.214636808  | 0.000719819 | 0.648453594  | 1.28E-30    |
| SLC25A4  | turquoise | -0.329284115 | 1.32E-07    | -0.726758857 | 1.62E-41    |
| SLC25A44 | turquoise | -0.301788754 | 1.49E-06    | -0.522059259 | 1.57E-18    |
| SLC25A46 | turquoise | -0.280479539 | 8.29E-06    | -0.606652328 | 5.10E-26    |
| SLC26A6  | turquoise | 0.223067684  | 0.000434586 | 0.590418124  | 2.08E-24    |
| SLC27A1  | turquoise | 0.278382963  | 9.74E-06    | 0.443668973  | 3.08E-13    |
| SLC2A1   | turquoise | 0.3777643    | 9.92E-10    | 0.441838985  | 3.95E-13    |
| SLC2A13  | turquoise | -0.21015667  | 0.000933999 | -0.254446375 | 5.60E-05    |
| SLC35B1  | turquoise | -0.272255404 | 1.55E-05    | -0.634594585 | 5.13E-29    |
| SLC39A1  | turquoise | 0.428470911  | 2.32E-12    | 0.394690293  | 1.47E-10    |
| SLC48A1  | turquoise | 0.254695051  | 5.51E-05    | 0.522628611  | 1.42E-18    |
| SLC4A11  | turquoise | 0.424098788  | 4.08E-12    | 0.340404948  | 4.63E-08    |
| SLC4A1AP | turquoise | -0.282592897 | 7.04E-06    | -0.498088146 | 9.12E-17    |

|          |           |              |             |              |             |
|----------|-----------|--------------|-------------|--------------|-------------|
| SLC6A12  | turquoise | 0.447423682  | 1.84E-13    | 0.528009722  | 5.44E-19    |
| SLC6A15  | turquoise | -0.279701187 | 8.80E-06    | -0.688621279 | 8.88E-36    |
| SLC6A16  | turquoise | 0.262560385  | 3.16E-05    | 0.325214586  | 1.92E-07    |
| SLC7A14  | turquoise | -0.136609815 | 0.032567353 | -0.186969644 | 0.003308497 |
| SLC7A2   | turquoise | 0.439974275  | 5.08E-13    | 0.532179431  | 2.56E-19    |
| SLC7A5   | turquoise | 0.223489589  | 0.000423538 | 0.520947796  | 1.91E-18    |
| SLC7A9   | turquoise | 0.315064282  | 4.78E-07    | 0.412361257  | 1.78E-11    |
| SLC8A3   | turquoise | -0.296065626 | 2.40E-06    | -0.241928268 | 0.000131104 |
| SLC9A3R1 | turquoise | 0.240932968  | 0.000140004 | 0.471777685  | 5.55E-15    |
| SLC9A6   | turquoise | -0.292677069 | 3.16E-06    | -0.480217223 | 1.54E-15    |
| SLCO2B1  | turquoise | 0.336356696  | 6.82E-08    | 0.363885007  | 4.38E-09    |
| SLCO4A1  | turquoise | 0.356008511  | 9.88E-09    | 0.363722053  | 4.46E-09    |
| SLITRK1  | turquoise | -0.296912536 | 2.24E-06    | -0.757477806 | 6.75E-47    |
| SLITRK3  | turquoise | -0.139840877 | 0.028638565 | -0.294905094 | 2.64E-06    |
| SLITRK4  | turquoise | -0.367947797 | 2.86E-09    | -0.606328177 | 5.50E-26    |
| SLITRK5  | turquoise | -0.202341303 | 0.001452832 | -0.559272332 | 1.46E-21    |
| SMAD6    | turquoise | 0.281796244  | 7.49E-06    | 0.42267923   | 4.89E-12    |
| SMAD9    | turquoise | 0.268008313  | 2.12E-05    | 0.351482046  | 1.56E-08    |
| SMARCC1  | turquoise | 0.355950544  | 9.93E-09    | 0.429485917  | 2.04E-12    |
| SMG5     | turquoise | 0.310979098  | 6.82E-07    | 0.496410415  | 1.20E-16    |
| SMO      | turquoise | 0.337600014  | 6.06E-08    | 0.49103492   | 2.84E-16    |
| SMOC1    | turquoise | 0.216740888  | 0.000635771 | 0.4425324    | 3.59E-13    |
| SMOX     | turquoise | 0.327914901  | 1.50E-07    | 0.562863714  | 7.09E-22    |
| SMPX     | turquoise | -0.14140361  | 0.026888722 | -0.272876616 | 1.48E-05    |
| SMYD2    | turquoise | -0.308192454 | 8.67E-07    | -0.539075641 | 7.18E-20    |
| SMYD3    | turquoise | -0.208937114 | 0.001001712 | -0.633340256 | 7.10E-29    |
| SNAP25   | turquoise | -0.458652993 | 3.79E-14    | -0.525686703 | 8.25E-19    |
| SNAP91   | turquoise | -0.335245909 | 7.57E-08    | -0.356612839 | 9.29E-09    |
| SNCA     | turquoise | -0.302840589 | 1.37E-06    | -0.740461918 | 8.02E-44    |
| SNRPN    | turquoise | -0.331653778 | 1.06E-07    | -0.402105089 | 6.16E-11    |
| SNTB1    | turquoise | 0.289612785  | 4.04E-06    | 0.28725387   | 4.88E-06    |
| SNX10    | turquoise | -0.358818806 | 7.41E-09    | -0.606515313 | 5.27E-26    |
| SNX22    | turquoise | 0.212363309  | 0.000822084 | 0.451281574  | 1.07E-13    |
| SORBS2   | turquoise | -0.291576206 | 3.45E-06    | -0.453674111 | 7.68E-14    |
| SOSTDC1  | turquoise | -0.071504689 | 0.264880686 | -0.30719888  | 9.44E-07    |
| SOX13    | turquoise | 0.29978306   | 1.76E-06    | 0.555197955  | 3.27E-21    |
| SP1      | turquoise | 0.342922376  | 3.63E-08    | 0.506554846  | 2.25E-17    |
| SP100    | turquoise | 0.248345814  | 8.53E-05    | 0.18975964   | 0.002862213 |
| SP110    | turquoise | 0.210562548  | 0.000912415 | 0.345366244  | 2.86E-08    |
| SPARC    | turquoise | 0.231540686  | 0.000256731 | 0.064633836  | 0.313665891 |

|            |           |              |             |              |             |
|------------|-----------|--------------|-------------|--------------|-------------|
| SPARCL1    | turquoise | -0.198644217 | 0.001780655 | -0.538569716 | 7.89E-20    |
| SPATA13    | turquoise | 0.392604874  | 1.87E-10    | 0.368685508  | 2.64E-09    |
| SPEN       | turquoise | 0.351107896  | 1.62E-08    | 0.575807362  | 4.90E-23    |
| SPINT2     | turquoise | -0.257091173 | 4.66E-05    | -0.408829369 | 2.74E-11    |
| SPOCK1     | turquoise | -0.293585465 | 2.94E-06    | -0.386365289 | 3.81E-10    |
| SPSB2      | turquoise | 0.212743166  | 0.000804115 | 0.162661256  | 0.010771172 |
| SRGAP1     | turquoise | 0.393894774  | 1.61E-10    | 0.606784006  | 4.95E-26    |
| SRGN       | turquoise | 0.301757964  | 1.50E-06    | 0.086235068  | 0.178497076 |
| SRP54      | turquoise | -0.243314689 | 0.000119586 | -0.629708915 | 1.80E-28    |
| SRPK2      | turquoise | -0.276526704 | 1.12E-05    | -0.485413865 | 6.90E-16    |
| SRRM2      | turquoise | 0.223091057  | 0.000433967 | 0.567956258  | 2.51E-22    |
| SSH3       | turquoise | 0.248489023  | 8.44E-05    | 0.499034269  | 7.82E-17    |
| SST        | turquoise | -0.353180341 | 1.31E-08    | -0.610687015 | 1.96E-26    |
| SSTR1      | turquoise | -0.263497444 | 2.95E-05    | -0.272850944 | 1.48E-05    |
| SSX2IP     | turquoise | -0.244980943 | 0.000106999 | -0.429298522 | 2.09E-12    |
| ST6GALNAC5 | turquoise | -0.325515275 | 1.87E-07    | -0.466655817 | 1.19E-14    |
| ST8SIA3    | turquoise | -0.268273019 | 2.08E-05    | -0.261502075 | 3.40E-05    |
| STAM       | turquoise | -0.25085725  | 7.18E-05    | -0.64042682  | 1.11E-29    |
| STAMBPL1   | turquoise | -0.26285107  | 3.09E-05    | -0.616608604 | 4.72E-27    |
| STAR3D3    | turquoise | 0.203240064  | 0.001381981 | 0.470320767  | 6.89E-15    |
| STAR3D8    | turquoise | 0.267996307  | 2.12E-05    | 0.632914503  | 7.93E-29    |
| STAT3      | turquoise | 0.27958267   | 8.88E-06    | 0.246860679  | 9.43E-05    |
| STAT4      | turquoise | -0.366142808 | 3.46E-09    | -0.621854976 | 1.30E-27    |
| STAT5A     | turquoise | 0.209685341  | 0.000959653 | 0.382511303  | 5.87E-10    |
| STAU2      | turquoise | -0.245785702 | 0.000101375 | -0.552620439 | 5.42E-21    |
| STEAP2     | turquoise | -0.265569516 | 2.54E-05    | -0.572857171 | 9.11E-23    |
| STEAP3     | turquoise | 0.386256275  | 3.86E-10    | 0.427743598  | 2.55E-12    |
| STH        | turquoise | 0.227894582  | 0.000322763 | 0.450267442  | 1.24E-13    |
| STK38      | turquoise | 0.347859979  | 2.24E-08    | 0.59115988   | 1.76E-24    |
| STMN2      | turquoise | -0.471502193 | 5.78E-15    | -0.613821644 | 9.27E-27    |
| STMN3      | turquoise | -0.340720184 | 4.49E-08    | -0.290358577 | 3.81E-06    |
| STMN4      | turquoise | -0.285576648 | 5.57E-06    | -0.317932542 | 3.71E-07    |
| STON2      | turquoise | 0.345099233  | 2.93E-08    | 0.229271202  | 0.000296167 |
| STX12      | turquoise | -0.224025531 | 0.000409879 | -0.501784449 | 4.98E-17    |
| STXBP5     | turquoise | -0.221012832 | 0.00049232  | -0.427519035 | 2.63E-12    |
| SUB1       | turquoise | -0.323785837 | 2.19E-07    | -0.589606543 | 2.49E-24    |
| SUCLA2     | turquoise | -0.31415702  | 5.17E-07    | -0.714208682 | 1.59E-39    |
| SULT4A1    | turquoise | -0.359156296 | 7.16E-09    | -0.514659729 | 5.69E-18    |
| SUSD1      | turquoise | -0.201568042 | 0.001516436 | -0.504422112 | 3.22E-17    |
| SV2A       | turquoise | -0.229118501 | 0.000299013 | -0.090791058 | 0.15655168  |

|          |           |              |             |              |             |
|----------|-----------|--------------|-------------|--------------|-------------|
| SV2B     | turquoise | -0.379134491 | 8.54E-10    | -0.539342537 | 6.83E-20    |
| SVIL     | turquoise | 0.304101371  | 1.23E-06    | 0.320089919  | 3.06E-07    |
| SYDE1    | turquoise | 0.372482739  | 1.76E-09    | 0.407878543  | 3.08E-11    |
| SYMPK    | turquoise | 0.049832801  | 0.437453647 | 0.281237256  | 7.82E-06    |
| SYN2     | turquoise | -0.316149121 | 4.34E-07    | -0.615115704 | 6.78E-27    |
| SYNGR1   | turquoise | -0.545108774 | 2.30E-20    | -0.274248237 | 1.33E-05    |
| SYNJ1    | turquoise | -0.348333056 | 2.13E-08    | -0.401127256 | 6.91E-11    |
| SYNPR    | turquoise | -0.221024807 | 0.000491964 | -0.454153349 | 7.18E-14    |
| SYT1     | turquoise | -0.36226014  | 5.19E-09    | -0.745541666 | 1.03E-44    |
| SYT13    | turquoise | -0.354691888 | 1.13E-08    | -0.540134706 | 5.89E-20    |
| SYT4     | turquoise | -0.382118528 | 6.14E-10    | -0.564620041 | 4.97E-22    |
| SYTL4    | turquoise | 0.414025261  | 1.45E-11    | 0.55640666   | 2.58E-21    |
| TAC1     | turquoise | -0.328956491 | 1.36E-07    | -0.497573126 | 9.92E-17    |
| TAF1     | turquoise | 0.23676956   | 0.000183727 | 0.510172196  | 1.22E-17    |
| TAF4     | turquoise | 0.347268103  | 2.37E-08    | 0.422243919  | 5.17E-12    |
| TAF6L    | turquoise | 0.205762752  | 0.00119969  | 0.457913444  | 4.21E-14    |
| TAGLN    | turquoise | 0.332884002  | 9.46E-08    | 0.460120233  | 3.07E-14    |
| TAGLN2   | turquoise | 0.090081916  | 0.159827026 | 0.010619582  | 0.868646986 |
| TAGLN3   | turquoise | -0.393013516 | 1.79E-10    | -0.702761885 | 8.46E-38    |
| TAP1     | turquoise | 0.238596007  | 0.000163173 | 0.435989056  | 8.65E-13    |
| TARBP1   | turquoise | -0.29312986  | 3.05E-06    | -0.368471106 | 2.70E-09    |
| TBC1D14  | turquoise | 0.389664201  | 2.62E-10    | 0.310705132  | 6.98E-07    |
| TBC1D16  | turquoise | 0.180266044  | 0.004648928 | 0.370257939  | 2.24E-09    |
| TBC1D19  | turquoise | -0.077727002 | 0.225423227 | -0.317976495 | 3.69E-07    |
| TBC1D2   | turquoise | 0.305572733  | 1.08E-06    | 0.293943364  | 2.85E-06    |
| TBC1D2B  | turquoise | 0.363814394  | 4.42E-09    | 0.394094436  | 1.58E-10    |
| TBC1D7   | turquoise | -0.197747716 | 0.00186972  | -0.447088916 | 1.92E-13    |
| TBPL1    | turquoise | -0.25890419  | 4.10E-05    | -0.487511589 | 4.96E-16    |
| TBX2     | turquoise | 0.369822905  | 2.34E-09    | 0.446746167  | 2.02E-13    |
| TBX3     | turquoise | 0.376872463  | 1.09E-09    | 0.462717822  | 2.11E-14    |
| TCAP     | turquoise | 0.243755589  | 0.000116127 | 0.515790039  | 4.68E-18    |
| TCEAL1   | turquoise | -0.31767478  | 3.79E-07    | -0.731401021 | 2.78E-42    |
| TCEAL2   | turquoise | -0.443331738 | 3.22E-13    | -0.538286706 | 8.31E-20    |
| TCEAL7   | turquoise | -0.344355381 | 3.16E-08    | -0.825833878 | 2.17E-62    |
| TCF3     | turquoise | 0.134306516  | 0.035640372 | 0.389355836  | 2.72E-10    |
| TCF7L2   | turquoise | 0.15480659   | 0.015293493 | 0.273751332  | 1.38E-05    |
| TCIRG1   | turquoise | 0.224934538  | 0.000387644 | 0.330215781  | 1.21E-07    |
| TCL1B    | turquoise | 0.240969189  | 0.00013967  | 0.478296014  | 2.07E-15    |
| TCTEX1D2 | turquoise | -0.320009596 | 3.08E-07    | -0.611074058 | 1.79E-26    |
| TEAD2    | turquoise | 0.479892985  | 1.62E-15    | 0.541550148  | 4.52E-20    |

|          |           |              |             |              |             |
|----------|-----------|--------------|-------------|--------------|-------------|
| TERF2IP  | turquoise | -0.388408479 | 3.03E-10    | -0.528638968 | 4.86E-19    |
| TFB2M    | turquoise | -0.265685646 | 2.52E-05    | -0.473046957 | 4.59E-15    |
| TFPI     | turquoise | 0.323093886  | 2.33E-07    | 0.293646002  | 2.92E-06    |
| TGFB111  | turquoise | 0.368835627  | 2.60E-09    | 0.34139747   | 4.21E-08    |
| TGIF1    | turquoise | 0.328032174  | 1.49E-07    | 0.417908723  | 8.94E-12    |
| TGM2     | turquoise | 0.207866444  | 0.001064852 | 0.249644159  | 7.81E-05    |
| THAP10   | turquoise | -0.239095908 | 0.000157935 | -0.399772924 | 8.12E-11    |
| THNSL1   | turquoise | -0.227219879 | 0.000336594 | -0.550469742 | 8.23E-21    |
| THOC7    | turquoise | -0.351609098 | 1.54E-08    | -0.759182764 | 3.22E-47    |
| THYN1    | turquoise | -0.319849101 | 3.12E-07    | -0.769148027 | 3.71E-49    |
| TIAM2    | turquoise | -0.07851703  | 0.220728894 | -0.25277373  | 6.29E-05    |
| TIMM23   | turquoise | -0.322152996 | 2.54E-07    | -0.561840163 | 8.72E-22    |
| TIMP1    | turquoise | 0.254886756  | 5.44E-05    | 0.284473062  | 6.08E-06    |
| TJP1     | turquoise | 0.363785015  | 4.43E-09    | 0.439045116  | 5.75E-13    |
| TJP2     | turquoise | 0.397331809  | 1.08E-10    | 0.250956931  | 7.13E-05    |
| TLN2     | turquoise | -0.309620983 | 7.67E-07    | -0.338704655 | 5.45E-08    |
| TLR5     | turquoise | 0.367790459  | 2.91E-09    | 0.368810058  | 2.61E-09    |
| TM2D2    | turquoise | -0.29714227  | 2.19E-06    | -0.586318763 | 5.12E-24    |
| TM2D3    | turquoise | -0.356168435 | 9.72E-09    | -0.621939262 | 1.27E-27    |
| TM4SF18  | turquoise | 0.350245362  | 1.76E-08    | 0.32042144   | 2.97E-07    |
| TM9SF2   | turquoise | -0.222004619 | 0.00046362  | -0.581931465 | 1.33E-23    |
| TMEFF2   | turquoise | -0.198395125 | 0.001805005 | -0.386698286 | 3.67E-10    |
| TMEM119  | turquoise | 0.289829018  | 3.97E-06    | 0.156902751  | 0.01394784  |
| TMEM126A | turquoise | -0.269478799 | 1.90E-05    | -0.568526799 | 2.24E-22    |
| TMEM132D | turquoise | -0.361931768 | 5.37E-09    | -0.498553542 | 8.46E-17    |
| TMEM14A  | turquoise | -0.311514038 | 6.51E-07    | -0.723574066 | 5.32E-41    |
| TMEM14B  | turquoise | -0.310688963 | 6.99E-07    | -0.473265624 | 4.44E-15    |
| TMEM155  | turquoise | -0.217316792 | 0.000614402 | -0.587657231 | 3.82E-24    |
| TMEM17   | turquoise | -0.316629384 | 4.16E-07    | -0.362674557 | 4.97E-09    |
| TMEM176A | turquoise | 0.226249249  | 0.00035746  | 0.297284604  | 2.17E-06    |
| TMEM200A | turquoise | -0.198475885 | 0.001797077 | -0.449400808 | 1.40E-13    |
| TMEM216  | turquoise | 0.375174742  | 1.32E-09    | 0.70059409   | 1.76E-37    |
| TMEM219  | turquoise | 0.199378435  | 0.001710618 | 0.422702966  | 4.88E-12    |
| TMEM38B  | turquoise | 0.337119177  | 6.34E-08    | 0.371392204  | 1.98E-09    |
| TMEM59   | turquoise | -0.173310241 | 0.006538643 | -0.390662036 | 2.34E-10    |
| TMEM59L  | turquoise | -0.291368836 | 3.51E-06    | 0.056746269  | 0.376485681 |
| TMEM97   | turquoise | -0.210927052 | 0.000893425 | -0.28851412  | 4.41E-06    |
| TMOD1    | turquoise | -0.275254649 | 1.24E-05    | -0.496461963 | 1.19E-16    |
| TMPRSS5  | turquoise | 0.237809916  | 0.000171741 | 0.233806492  | 0.000222287 |
| TMSB10   | turquoise | -0.188776009 | 0.003012905 | -0.40924878  | 2.61E-11    |

|           |           |              |             |              |             |
|-----------|-----------|--------------|-------------|--------------|-------------|
| TNFRSF10B | turquoise | 0.382943389  | 5.60E-10    | 0.622611393  | 1.08E-27    |
| TNFRSF1A  | turquoise | 0.300728642  | 1.63E-06    | 0.386824628  | 3.62E-10    |
| TNFRSF1B  | turquoise | 0.249881753  | 7.68E-05    | 0.518556417  | 2.90E-18    |
| TNFRSF21  | turquoise | -0.230349115 | 0.000276782 | -0.406908649 | 3.46E-11    |
| TNIP1     | turquoise | 0.392347354  | 1.93E-10    | 0.488567462  | 4.20E-16    |
| TNS1      | turquoise | 0.423910312  | 4.18E-12    | 0.499492058  | 7.25E-17    |
| TOB1      | turquoise | 0.315002991  | 4.80E-07    | 0.363573397  | 4.53E-09    |
| TOB2      | turquoise | 0.100532456  | 0.116528398 | 0.490030036  | 3.33E-16    |
| TOMM20    | turquoise | -0.451051537 | 1.11E-13    | -0.672009114 | 1.51E-33    |
| TOR1A     | turquoise | -0.180201917 | 0.004663826 | -0.654865083 | 2.17E-31    |
| TP53INP1  | turquoise | 0.371274356  | 2.01E-09    | 0.590810694  | 1.90E-24    |
| TPM1      | turquoise | -0.272608985 | 1.51E-05    | -0.499389167 | 7.38E-17    |
| TPM2      | turquoise | 0.310285607  | 7.24E-07    | 0.48544153   | 6.87E-16    |
| TRAP1     | turquoise | -0.173629371 | 0.006438802 | -0.513107144 | 7.43E-18    |
| TRAPPC6B  | turquoise | -0.289886309 | 3.96E-06    | -0.268781815 | 2.01E-05    |
| TRIM36    | turquoise | -0.295663128 | 2.48E-06    | -0.398082728 | 9.90E-11    |
| TRIM37    | turquoise | -0.284539926 | 6.04E-06    | -0.740782443 | 7.05E-44    |
| TRIM47    | turquoise | 0.219698741  | 0.000532885 | 0.127940646  | 0.045438153 |
| TRIM56    | turquoise | 0.356266506  | 9.62E-09    | 0.555619738  | 3.01E-21    |
| TRIOBP    | turquoise | 0.241510862  | 0.00013477  | 0.239427108  | 0.000154551 |
| TRIP10    | turquoise | 0.387183503  | 3.48E-10    | 0.253340034  | 6.05E-05    |
| TRIP6     | turquoise | 0.287926623  | 4.63E-06    | 0.437243709  | 7.32E-13    |
| TRO       | turquoise | -0.225297139 | 0.000379091 | -0.169567507 | 0.007817148 |
| TSPAN1    | turquoise | -0.258258233 | 4.29E-05    | -0.231020336 | 0.000265315 |
| TSPAN13   | turquoise | -0.28349693  | 6.56E-06    | -0.681110738 | 9.45E-35    |
| TSPAN4    | turquoise | 0.190770363  | 0.002714524 | 0.582656404  | 1.14E-23    |
| TSPAN5    | turquoise | -0.111425639 | 0.081755128 | -0.106983685 | 0.094762331 |
| TSPAN7    | turquoise | -0.477310577 | 2.41E-15    | -0.726905733 | 1.53E-41    |
| TSPO      | turquoise | 0.45659982   | 5.08E-14    | 0.64946205   | 9.69E-31    |
| TSPYL1    | turquoise | -0.350227067 | 1.77E-08    | -0.7616536   | 1.09E-47    |
| TSPYL5    | turquoise | -0.243232155 | 0.000120244 | -0.519136389 | 2.62E-18    |
| TTC19     | turquoise | -0.282490563 | 7.09E-06    | -0.610741775 | 1.94E-26    |
| TTC23     | turquoise | 0.304472694  | 1.19E-06    | 0.516740157  | 3.98E-18    |
| TTC38     | turquoise | 0.368403194  | 2.72E-09    | 0.548732535  | 1.15E-20    |
| TTL3      | turquoise | 0.196161407  | 0.00203734  | 0.153192065  | 0.016406088 |
| TUBA1B    | turquoise | -0.23043571  | 0.000275277 | -0.411241838 | 2.04E-11    |
| TUBA4A    | turquoise | -0.367831454 | 2.89E-09    | -0.282448486 | 7.12E-06    |
| TUBB      | turquoise | -0.121445539 | 0.05766527  | -0.217088569 | 0.00062279  |
| TUBB2A    | turquoise | -0.468853674 | 8.57E-15    | -0.650309008 | 7.67E-31    |
| TUBB3     | turquoise | -0.323703391 | 2.21E-07    | -0.456254054 | 5.33E-14    |



|          |           |              |             |              |             |
|----------|-----------|--------------|-------------|--------------|-------------|
| TUBG1    | turquoise | -0.319064586 | 3.35E-07    | -0.160778244 | 0.011731354 |
| TUSC3    | turquoise | -0.31996859  | 3.09E-07    | -0.67914338  | 1.74E-34    |
| TXNDC9   | turquoise | -0.278219545 | 9.86E-06    | -0.3771178   | 1.07E-09    |
| TXNL1    | turquoise | -0.193546869 | 0.002343735 | -0.308464019 | 8.47E-07    |
| UBE2E2   | turquoise | -0.275971964 | 1.17E-05    | -0.494454989 | 1.64E-16    |
| UBE2E3   | turquoise | -0.29243902  | 3.22E-06    | -0.693992524 | 1.57E-36    |
| UBE2N    | turquoise | -0.351443484 | 1.57E-08    | -0.603156378 | 1.15E-25    |
| UBE2T    | turquoise | -0.266109677 | 2.44E-05    | -0.503209444 | 3.93E-17    |
| UBE2V2   | turquoise | -0.364097331 | 4.29E-09    | -0.625786698 | 4.87E-28    |
| UBL3     | turquoise | -0.25516868  | 5.33E-05    | -0.442169986 | 3.77E-13    |
| UBL5     | turquoise | -0.198061864 | 0.001838058 | -0.215168736 | 0.000697653 |
| UBLCP1   | turquoise | -0.329846244 | 1.26E-07    | -0.321167338 | 2.77E-07    |
| UBQLN1   | turquoise | -0.332471668 | 9.83E-08    | -0.630952213 | 1.31E-28    |
| UBQLN2   | turquoise | -0.357838929 | 8.19E-09    | -0.503077008 | 4.02E-17    |
| UCHL1    | turquoise | -0.330661932 | 1.16E-07    | -0.731150124 | 3.06E-42    |
| UCHL5    | turquoise | -0.279426863 | 8.99E-06    | -0.668593037 | 4.18E-33    |
| UGP2     | turquoise | -0.24577825  | 0.000101425 | -0.701053761 | 1.51E-37    |
| UHRF1    | turquoise | 0.371795845  | 1.90E-09    | 0.481004772  | 1.37E-15    |
| UNC5B    | turquoise | 0.178010205  | 0.005199549 | 0.155910001  | 0.014571621 |
| UNKL     | turquoise | 0.361660587  | 5.53E-09    | 0.420834058  | 6.18E-12    |
| UPF3A    | turquoise | 0.16127627   | 0.01147033  | 0.526771794  | 6.80E-19    |
| UQCRC2   | turquoise | -0.392320379 | 1.93E-10    | -0.713732838 | 1.88E-39    |
| UQCRFS1  | turquoise | -0.260928082 | 3.55E-05    | -0.637897857 | 2.16E-29    |
| VAMP1    | turquoise | -0.241753351 | 0.000132628 | -0.374203895 | 1.46E-09    |
| VAMP5    | turquoise | 0.316958187  | 4.04E-07    | 0.349757656  | 1.85E-08    |
| VAPA     | turquoise | -0.395408612 | 1.35E-10    | -0.276873635 | 1.09E-05    |
| VASH1    | turquoise | 0.259830893  | 3.84E-05    | 0.480476712  | 1.48E-15    |
| VASN     | turquoise | 0.226791636  | 0.000345656 | 0.335589753  | 7.33E-08    |
| VAT1L    | turquoise | -0.190768389 | 0.002714806 | -0.464420782 | 1.64E-14    |
| VAV2     | turquoise | 0.225920871  | 0.000364787 | 0.528665827  | 4.84E-19    |
| VBP1     | turquoise | -0.280105118 | 8.53E-06    | -0.584130175 | 8.26E-24    |
| VCAM1    | turquoise | 0.131743314  | 0.03934571  | 0.177930164  | 0.005220119 |
| VDAC1    | turquoise | -0.388290489 | 3.07E-10    | -0.804812218 | 5.60E-57    |
| VGFB     | turquoise | -0.449488677 | 1.38E-13    | -0.392464959 | 1.90E-10    |
| VIP      | turquoise | -0.3873027   | 3.43E-10    | -0.435254875 | 9.54E-13    |
| VKORC1L1 | turquoise | -0.308393477 | 8.52E-07    | -0.563045037 | 6.84E-22    |
| VLDLR    | turquoise | -0.23290937  | 0.000235374 | -0.527872229 | 5.58E-19    |
| VPS29    | turquoise | -0.228754444 | 0.000305902 | -0.707272049 | 1.81E-38    |
| VPS35    | turquoise | -0.280229248 | 8.45E-06    | -0.576070847 | 4.64E-23    |
| VSNL1    | turquoise | -0.360714827 | 6.10E-09    | -0.588424777 | 3.23E-24    |

|         |           |              |             |              |             |
|---------|-----------|--------------|-------------|--------------|-------------|
| VTA1    | turquoise | -0.30176347  | 1.50E-06    | -0.462423778 | 2.20E-14    |
| WAS     | turquoise | 0.194312258  | 0.002249962 | 0.331738787  | 1.05E-07    |
| WASF1   | turquoise | -0.380917056 | 7.01E-10    | -0.631400679 | 1.17E-28    |
| WASF2   | turquoise | 0.215325593  | 0.000691238 | 0.304565422  | 1.18E-06    |
| WASL    | turquoise | -0.322764081 | 2.40E-07    | -0.59113362  | 1.77E-24    |
| WDR20   | turquoise | 0.319623043  | 3.19E-07    | 0.586593821  | 4.82E-24    |
| WDR37   | turquoise | -0.226632492 | 0.000349082 | -0.442654888 | 3.53E-13    |
| WDR47   | turquoise | -0.33503482  | 7.73E-08    | -0.746628893 | 6.58E-45    |
| WDR54   | turquoise | -0.364626352 | 4.06E-09    | -0.48924562  | 3.77E-16    |
| WDR61   | turquoise | -0.283096222 | 6.77E-06    | -0.661763886 | 3.06E-32    |
| WDR7    | turquoise | -0.211876272 | 0.000845665 | -0.630506913 | 1.47E-28    |
| WWC3    | turquoise | 0.409784704  | 2.44E-11    | 0.52119497   | 1.83E-18    |
| WWTR1   | turquoise | 0.320820184  | 2.86E-07    | 0.027582434  | 0.667481376 |
| XAF1    | turquoise | 0.174401355  | 0.006202898 | 0.560368668  | 1.17E-21    |
| XK      | turquoise | -0.295515376 | 2.51E-06    | -0.615165357 | 6.70E-27    |
| YARS2   | turquoise | -0.143863531 | 0.024320246 | -0.497719467 | 9.69E-17    |
| YPEL5   | turquoise | -0.266505642 | 2.37E-05    | -0.635441431 | 4.12E-29    |
| YTHDF2  | turquoise | -0.34333251  | 3.49E-08    | -0.598456891 | 3.40E-25    |
| YWHAB   | turquoise | -0.424119802 | 4.07E-12    | -0.611154153 | 1.76E-26    |
| YWHAG   | turquoise | -0.413753636 | 1.50E-11    | -0.664466813 | 1.40E-32    |
| YWHAH   | turquoise | -0.316639284 | 4.16E-07    | -0.639161809 | 1.55E-29    |
| YWHAZ   | turquoise | -0.393224606 | 1.74E-10    | -0.778896113 | 3.78E-51    |
| ZBTB20  | turquoise | 0.420794094  | 6.22E-12    | 0.664997843  | 1.20E-32    |
| ZBTB34  | turquoise | 0.314384655  | 5.07E-07    | 0.318911309  | 3.40E-07    |
| ZC3H15  | turquoise | -0.237634225 | 0.000173712 | -0.64775648  | 1.54E-30    |
| ZC3HAV1 | turquoise | 0.272152879  | 1.56E-05    | 0.439931303  | 5.11E-13    |
| ZCCHC12 | turquoise | -0.3519432   | 1.49E-08    | -0.686687153 | 1.64E-35    |
| ZCCHC17 | turquoise | -0.267635056 | 2.18E-05    | -0.508365733 | 1.66E-17    |
| ZDHHC11 | turquoise | 0.276093085  | 1.16E-05    | 0.361866296  | 5.41E-09    |
| ZDHHC17 | turquoise | -0.247967977 | 8.75E-05    | -0.481477432 | 1.27E-15    |
| ZDHHC23 | turquoise | -0.243498956 | 0.000118129 | -0.365888731 | 3.55E-09    |
| ZFAND1  | turquoise | -0.297309742 | 2.16E-06    | -0.597839384 | 3.92E-25    |
| ZFAND5  | turquoise | -0.370136208 | 2.26E-09    | -0.502890539 | 4.15E-17    |
| ZFP36   | turquoise | 0.310931995  | 6.85E-07    | 0.187170669  | 0.00327435  |
| ZFP36L2 | turquoise | 0.269526846  | 1.90E-05    | 0.015469105  | 0.809628021 |
| ZFPM2   | turquoise | -0.203333711 | 0.001374783 | -0.400292317 | 7.63E-11    |
| ZIC2    | turquoise | 0.229617348  | 0.000289808 | 0.365837476  | 3.57E-09    |
| ZMAT4   | turquoise | -0.096173683 | 0.13331948  | -0.055664764 | 0.385663524 |
| ZMIZ2   | turquoise | 0.333579503  | 8.86E-08    | 0.58817507   | 3.41E-24    |
| ZMYND15 | turquoise | 0.254198786  | 5.70E-05    | 0.306234955  | 1.03E-06    |

|          |           |              |             |              |             |
|----------|-----------|--------------|-------------|--------------|-------------|
| ZNF184   | turquoise | -0.400555179 | 7.40E-11    | -0.573925143 | 7.28E-23    |
| ZNF205   | turquoise | 0.313523151  | 5.47E-07    | 0.330519195  | 1.18E-07    |
| ZNF215   | turquoise | -0.332349287 | 9.95E-08    | -0.210406548 | 0.000920656 |
| ZNF25    | turquoise | -0.376342247 | 1.16E-09    | -0.600785111 | 2.00E-25    |
| ZNF326   | turquoise | 0.285571484  | 5.57E-06    | 0.312900032  | 5.77E-07    |
| ZNF365   | turquoise | -0.363723783 | 4.46E-09    | -0.471257266 | 6.00E-15    |
| ZNF385B  | turquoise | -0.25174909  | 6.76E-05    | -0.655307809 | 1.91E-31    |
| ZNF395   | turquoise | 0.391140086  | 2.22E-10    | 0.416750389  | 1.03E-11    |
| ZNF397   | turquoise | 0.381317744  | 6.71E-10    | 0.479168997  | 1.81E-15    |
| ZNF621   | turquoise | 0.373447613  | 1.59E-09    | 0.678045581  | 2.43E-34    |
| ZNHIT3   | turquoise | -0.238750559 | 0.000161537 | -0.625619932 | 5.08E-28    |
| ZRANB2   | turquoise | -0.306001991 | 1.05E-06    | -0.410123097 | 2.34E-11    |
| ZWILCH   | turquoise | -0.330400609 | 1.19E-07    | -0.465430062 | 1.42E-14    |
| ZYG11B   | turquoise | -0.317476448 | 3.86E-07    | -0.274371029 | 1.32E-05    |
| ABL1     | yellow    | 0.340303933  | 4.67E-08    | 0.798667906  | 1.61E-55    |
| ADAM17   | yellow    | 0.218565341  | 0.000570336 | 0.799877104  | 8.40E-56    |
| ADH4     | yellow    | 0.048086061  | 0.453706363 | 0.664546106  | 1.37E-32    |
| AJAP1    | yellow    | 0.192199396  | 0.002517507 | 0.404917851  | 4.40E-11    |
| ARAP2    | yellow    | 0.252480228  | 6.42E-05    | 0.530344592  | 3.57E-19    |
| ARID4B   | yellow    | 0.271704824  | 1.61E-05    | 0.764905538  | 2.55E-48    |
| ATG12    | yellow    | 0.169850502  | 0.007713225 | 0.761286881  | 1.28E-47    |
| BLZF1    | yellow    | 0.234117366  | 0.000217912 | 0.773079606  | 6.00E-50    |
| C11orf1  | yellow    | -0.141976763 | 0.026270349 | -0.561764472 | 8.85E-22    |
| C21orf58 | yellow    | 0.298539202  | 1.96E-06    | 0.81188484   | 1.01E-58    |
| C9orf64  | yellow    | 0.23413043   | 0.00021773  | 0.627619333  | 3.07E-28    |
| CATSPER2 | yellow    | 0.300063212  | 1.72E-06    | 0.636660222  | 2.99E-29    |
| CCDC125  | yellow    | 0.303444797  | 1.30E-06    | 0.775606197  | 1.83E-50    |
| CD68     | yellow    | 0.259478563  | 3.93E-05    | 0.776313422  | 1.30E-50    |
| CDC42BPA | yellow    | 0.239354464  | 0.000155287 | 0.519046603  | 2.66E-18    |
| CDK10    | yellow    | 0.319563644  | 3.20E-07    | 0.795765562  | 7.57E-55    |
| CDKN2AIP | yellow    | 0.219117429  | 0.000551799 | 0.676373516  | 4.05E-34    |
| CENPB    | yellow    | 0.283126734  | 6.75E-06    | 0.742497811  | 3.54E-44    |
| CETN3    | yellow    | 0.189700825  | 0.002871028 | 0.630280662  | 1.56E-28    |
| CHST12   | yellow    | 0.32176105   | 2.63E-07    | 0.71519981   | 1.12E-39    |
| CLCN7    | yellow    | 0.259108231  | 4.04E-05    | 0.813038965  | 5.15E-59    |
| CLK3     | yellow    | 0.241722469  | 0.000132899 | 0.743314891  | 2.54E-44    |
| CLN8     | yellow    | 0.327011746  | 1.63E-07    | 0.490901323  | 2.90E-16    |
| CNNM3    | yellow    | 0.335670176  | 7.28E-08    | 0.77645704   | 1.22E-50    |
| CRCP     | yellow    | 0.186945838  | 0.003312562 | 0.668542083  | 4.24E-33    |
| CTSB     | yellow    | 0.273590766  | 1.40E-05    | 0.783276174  | 4.46E-52    |

|         |        |              |             |              |           |
|---------|--------|--------------|-------------|--------------|-----------|
| DBT     | yellow | 0.180904248  | 0.004502977 | 0.7334475    | 1.26E-42  |
| DCLRE1C | yellow | 0.278872112  | 9.38E-06    | 0.917236585  | 4.06E-99  |
| DDX27   | yellow | 0.276607137  | 1.12E-05    | 0.84573405   | 3.13E-68  |
| DENND4C | yellow | 0.370859651  | 2.10E-09    | 0.768471648  | 5.06E-49  |
| DENR    | yellow | 0.295321945  | 2.55E-06    | 0.922707758  | 1.40E-102 |
| DFFA    | yellow | 0.344119985  | 3.23E-08    | 0.822290008  | 1.99E-61  |
| DPP7    | yellow | 0.204892342  | 0.001259931 | 0.728395874  | 8.74E-42  |
| DSEL    | yellow | 0.21740767   | 0.000611091 | 0.808532647  | 6.91E-58  |
| DTWD2   | yellow | 0.259424212  | 3.95E-05    | 0.833362473  | 1.65E-64  |
| EIF2AK4 | yellow | 0.257990452  | 4.37E-05    | 0.884324548  | 2.38E-82  |
| ELAVL3  | yellow | 0.095686882  | 0.135304768 | 0.724346296  | 3.99E-41  |
| ERCC5   | yellow | 0.318452614  | 3.54E-07    | 0.711933234  | 3.56E-39  |
| ERGIC1  | yellow | 0.313955798  | 5.26E-07    | 0.779976785  | 2.24E-51  |
| EVI5    | yellow | 0.203595004  | 0.001354883 | 0.84169732   | 5.55E-67  |
| FAM43A  | yellow | 0.176883384  | 0.005495948 | 0.407285413  | 3.31E-11  |
| FASTK   | yellow | 0.021098934  | 0.74245939  | 0.611078555  | 1.79E-26  |
| FCF1    | yellow | 0.195988713  | 0.002056392 | 0.61999886   | 2.06E-27  |
| FXR1    | yellow | 0.207873091  | 0.001064449 | 0.371320471  | 2.00E-09  |
| GGA3    | yellow | 0.260556602  | 3.64E-05    | 0.532369175  | 2.47E-19  |
| GLO1    | yellow | -0.313428916 | 5.51E-07    | -0.799463822 | 1.05E-55  |
| GNB4    | yellow | 0.180822556  | 0.004521426 | 0.540274918  | 5.74E-20  |
| GNL3L   | yellow | 0.20997965   | 0.000943559 | 0.780196012  | 2.02E-51  |
| GPSM1   | yellow | 0.215623262  | 0.000679214 | 0.71294795   | 2.49E-39  |
| GSDMB   | yellow | 0.312525924  | 5.96E-07    | 0.785158566  | 1.75E-52  |
| HMG2    | yellow | -0.317788359 | 3.75E-07    | -0.414111323 | 1.43E-11  |
| HSCB    | yellow | 0.253397824  | 6.03E-05    | 0.80253949   | 1.97E-56  |
| HYDIN   | yellow | 0.40683087   | 3.49E-11    | 0.710772689  | 5.35E-39  |
| IFNAR2  | yellow | 0.236856414  | 0.000182697 | 0.689574724  | 6.55E-36  |
| IL17RD  | yellow | 0.201297482  | 0.001539285 | 0.717994733  | 4.10E-40  |
| ITSN1   | yellow | 0.456391849  | 5.23E-14    | 0.814478497  | 2.21E-59  |
| JAKMIP3 | yellow | 0.362230821  | 5.21E-09    | 0.756852088  | 8.85E-47  |
| KAT2A   | yellow | 0.291888043  | 3.37E-06    | 0.705095926  | 3.82E-38  |
| KCNK12  | yellow | 0.437850459  | 6.75E-13    | 0.695367263  | 9.98E-37  |
| KDSR    | yellow | 0.242578691  | 0.000125577 | 0.596687217  | 5.09E-25  |
| KHDRBS1 | yellow | -0.297721591 | 2.09E-06    | -0.794381343 | 1.57E-54  |
| KHSRP   | yellow | 0.106613645  | 0.095916353 | 0.648963525  | 1.11E-30  |
| KLKB1   | yellow | 0.300961431  | 1.60E-06    | 0.501935987  | 4.86E-17  |
| LCOR    | yellow | 0.042999345  | 0.502912529 | 0.528703457  | 4.80E-19  |
| LLPH    | yellow | 0.269086169  | 1.96E-05    | 0.83402582   | 1.06E-64  |
| LRCH4   | yellow | 0.301546502  | 1.52E-06    | 0.748875121  | 2.60E-45  |

|           |        |              |             |              |          |
|-----------|--------|--------------|-------------|--------------|----------|
| LRP5      | yellow | 0.351444108  | 1.57E-08    | 0.763730516  | 4.32E-48 |
| MAFF      | yellow | 0.279652895  | 8.84E-06    | 0.352654941  | 1.39E-08 |
| MAX       | yellow | 0.208913618  | 0.00100306  | 0.67365583   | 9.23E-34 |
| METTL2B   | yellow | 0.215262753  | 0.000693802 | 0.628832349  | 2.26E-28 |
| MLXIPL    | yellow | 0.215316119  | 0.000691624 | 0.65480687   | 2.20E-31 |
| NFIC      | yellow | 0.210760354  | 0.000902064 | 0.72014914   | 1.87E-40 |
| NOP14     | yellow | 0.143677878  | 0.024506433 | 0.750304315  | 1.43E-45 |
| NOTCH1    | yellow | 0.405339988  | 4.18E-11    | 0.738162255  | 2.00E-43 |
| NR1H3     | yellow | 0.298144975  | 2.02E-06    | 0.669251381  | 3.44E-33 |
| NUBPL     | yellow | 0.275855396  | 1.18E-05    | 0.799395588  | 1.09E-55 |
| OPA3      | yellow | 0.251657804  | 6.80E-05    | 0.778302382  | 5.04E-51 |
| PAPOLA    | yellow | 0.306623891  | 9.92E-07    | 0.634625219  | 5.09E-29 |
| PDCD4     | yellow | 0.242706085  | 0.00012452  | 0.8627925    | 6.15E-74 |
| PHAX      | yellow | 0.147627458  | 0.020799848 | 0.449744537  | 1.33E-13 |
| PHF21A    | yellow | 0.344780534  | 3.03E-08    | 0.790740419  | 1.04E-53 |
| PIAS4     | yellow | 0.283789355  | 6.41E-06    | 0.788934468  | 2.62E-53 |
| PIGX      | yellow | 0.270323042  | 1.79E-05    | 0.760461629  | 1.84E-47 |
| PLA2G2D   | yellow | 0.245398527  | 0.000104045 | 0.859142423  | 1.18E-72 |
| PLEKHO1   | yellow | 0.276590772  | 1.12E-05    | 0.726770407  | 1.61E-41 |
| POLR1B    | yellow | 0.233562152  | 0.000225782 | 0.681779099  | 7.68E-35 |
| PPFIBP1   | yellow | 0.09922257   | 0.121391078 | 0.538804401  | 7.55E-20 |
| PPP1R16A  | yellow | 0.417767358  | 9.10E-12    | 0.723601626  | 5.26E-41 |
| PPP2R3A   | yellow | 0.188277143  | 0.003092049 | 0.798292694  | 1.97E-55 |
| PRMT2     | yellow | 0.315747602  | 4.50E-07    | 0.759916004  | 2.33E-47 |
| PRR14     | yellow | 0.246183393  | 9.87E-05    | 0.844309665  | 8.71E-68 |
| PTGR2     | yellow | 0.229463705  | 0.000292615 | 0.588705846  | 3.03E-24 |
| RAB11FIP3 | yellow | 0.151425627  | 0.017703711 | 0.648991827  | 1.10E-30 |
| RAD51     | yellow | 0.211975059  | 0.000840832 | 0.819292414  | 1.25E-60 |
| RAX2      | yellow | 0.186240308  | 0.003435107 | 0.685275147  | 2.57E-35 |
| RBM39     | yellow | 0.207265975  | 0.001101844 | 0.709173233  | 9.36E-39 |
| RBM6      | yellow | 0.44900419   | 1.48E-13    | 0.834561872  | 7.41E-65 |
| RFX4      | yellow | 0.274748936  | 1.28E-05    | 0.708070249  | 1.37E-38 |
| RNF213    | yellow | 0.255678949  | 5.14E-05    | 0.864837268  | 1.13E-74 |
| RNF216    | yellow | 0.333869892  | 8.62E-08    | 0.725240534  | 2.86E-41 |
| RPS6KB2   | yellow | 0.143181577  | 0.0250102   | 0.71261372   | 2.80E-39 |
| RYBP      | yellow | 0.185129159  | 0.003636437 | 0.413611336  | 1.53E-11 |
| SCD5      | yellow | -0.194699891 | 0.002203785 | -0.452642655 | 8.88E-14 |
| SCRIB     | yellow | 0.382819113  | 5.68E-10    | 0.85635737   | 1.07E-71 |
| SLC12A9   | yellow | 0.278685211  | 9.52E-06    | 0.717661094  | 4.62E-40 |
| SLC38A2   | yellow | 0.376674195  | 1.12E-09    | 0.443800477  | 3.02E-13 |

|         |        |              |             |              |          |
|---------|--------|--------------|-------------|--------------|----------|
| SLC5A3  | yellow | 0.388100232  | 3.13E-10    | 0.705782845  | 3.02E-38 |
| SLCO3A1 | yellow | 0.280418982  | 8.33E-06    | 0.765342926  | 2.09E-48 |
| SNAPC1  | yellow | 0.200294801  | 0.001626741 | 0.776447821  | 1.22E-50 |
| SORBS1  | yellow | 0.347366253  | 2.35E-08    | 0.783345307  | 4.31E-52 |
| SPCS1   | yellow | -0.413528349 | 1.54E-11    | -0.772668774 | 7.28E-50 |
| SPOP    | yellow | 0.237361902  | 0.00017681  | 0.698455142  | 3.59E-37 |
| STK36   | yellow | 0.331522515  | 1.07E-07    | 0.721092444  | 1.33E-40 |
| SYNJ2BP | yellow | 0.30029561   | 1.69E-06    | 0.913954683  | 3.73E-97 |
| THOC2   | yellow | 0.363251757  | 4.68E-09    | 0.845214858  | 4.55E-68 |
| TMEM91  | yellow | 0.214454683  | 0.000727557 | 0.683223634  | 4.90E-35 |
| TNFSF14 | yellow | 0.244046681  | 0.000113894 | 0.873594412  | 5.77E-78 |
| TP53I13 | yellow | 0.319759951  | 3.15E-07    | 0.792531081  | 4.12E-54 |
| TRABD   | yellow | 0.383363967  | 5.34E-10    | 0.855128199  | 2.77E-71 |
| TSC22D1 | yellow | -0.298694369 | 1.93E-06    | -0.669208047 | 3.48E-33 |
| TSPAN31 | yellow | 0.211260587  | 0.000876367 | 0.645973361  | 2.51E-30 |
| TSPAN33 | yellow | 0.226173417  | 0.00035914  | 0.611877496  | 1.48E-26 |
| TUBA1C  | yellow | -0.336804439 | 6.53E-08    | -0.80051434  | 5.95E-56 |
| TXLNA   | yellow | 0.384629003  | 4.64E-10    | 0.838018759  | 7.13E-66 |
| U2AF2   | yellow | 0.237721047  | 0.000172736 | 0.637733426  | 2.26E-29 |
| UBE2H   | yellow | 0.271935168  | 1.59E-05    | 0.386469542  | 3.77E-10 |
| UBXN2A  | yellow | 0.315232295  | 4.71E-07    | 0.897559625  | 2.13E-88 |
| USP49   | yellow | 0.25552459   | 5.20E-05    | 0.715714692  | 9.30E-40 |
| VGLL4   | yellow | 0.360897977  | 5.98E-09    | 0.742988644  | 2.90E-44 |
| WVOX    | yellow | 0.340780912  | 4.46E-08    | 0.810859493  | 1.82E-58 |
| XRCC2   | yellow | 0.151476819  | 0.017664884 | 0.353371964  | 1.29E-08 |
| YY1     | yellow | 0.381325055  | 6.70E-10    | 0.494946606  | 1.52E-16 |
| ZDHHC8  | yellow | 0.334765838  | 7.93E-08    | 0.818382863  | 2.16E-60 |
| ZHX3    | yellow | 0.450191403  | 1.25E-13    | 0.765963602  | 1.58E-48 |
| ZNF148  | yellow | 0.283393579  | 6.61E-06    | 0.723527717  | 5.41E-41 |
| ZNF160  | yellow | 0.345485604  | 2.83E-08    | 0.763078907  | 5.77E-48 |
| ZNF223  | yellow | 0.211373036  | 0.000870684 | 0.77384458   | 4.19E-50 |
| ZNF320  | yellow | 0.15514756   | 0.015067155 | 0.650557768  | 7.17E-31 |
| ZNF462  | yellow | 0.317026469  | 4.02E-07    | 0.762080983  | 8.99E-48 |
| ZNF652  | yellow | 0.348756872  | 2.05E-08    | 0.829279021  | 2.39E-63 |
| ZNF669  | yellow | 0.225721318  | 0.000369308 | 0.806440018  | 2.26E-57 |
| ZNF672  | yellow | 0.314290683  | 5.11E-07    | 0.698764361  | 3.24E-37 |
| ZNF682  | yellow | 0.254407435  | 5.62E-05    | 0.629363319  | 1.97E-28 |
| ZNF738  | yellow | 0.25279178   | 6.29E-05    | 0.742828733  | 3.10E-44 |
| ZNF771  | yellow | 0.347813646  | 2.25E-08    | 0.85575104   | 1.71E-71 |
| ZNF777  | yellow | 0.173762736  | 0.006397484 | 0.554147302  | 4.02E-21 |

|        |        |             |             |             |          |
|--------|--------|-------------|-------------|-------------|----------|
| ZNF786 | yellow | 0.33653914  | 6.70E-08    | 0.915130733 | 7.54E-98 |
| ZNF787 | yellow | 0.243748706 | 0.00011618  | 0.730520167 | 3.90E-42 |
| ZNF827 | yellow | 0.127752392 | 0.045759234 | 0.668185753 | 4.71E-33 |
| ZNF93  | yellow | 0.208271111 | 0.00104057  | 0.763573217 | 4.63E-48 |

| MMbrown      | p.MMbrown   | MMgreen      | p.MMgreen   | MMblue       | p.MMblue  |
|--------------|-------------|--------------|-------------|--------------|-----------|
| -0.468969101 | 8.42E-15    | -0.445472738 | 2.40E-13    | 0.674037898  | 8.23E-34  |
| -0.088711297 | 0.16630311  | -0.023776313 | 0.711153542 | 0.369011634  | 2.55E-09  |
| -0.265714765 | 2.51E-05    | -0.141686062 | 0.026582442 | 0.693106764  | 2.09E-36  |
| -0.13751998  | 0.03141677  | -0.114240093 | 0.074286728 | 0.738126601  | 2.03E-43  |
| -0.3976382   | 1.04E-10    | -0.100668665 | 0.116031607 | 0.743735376  | 2.14E-44  |
| -0.123407151 | 0.05371482  | -0.079439857 | 0.215334192 | 0.396335987  | 1.21E-10  |
| -0.424542704 | 3.86E-12    | -0.276118092 | 1.16E-05    | 0.858779191  | 1.58E-72  |
| 0.06656187   | 0.299418516 | 0.064643786  | 0.313591246 | -0.450282059 | 1.24E-13  |
| -0.477411097 | 2.37E-15    | -0.237142867 | 0.000179339 | 0.848103139  | 5.56E-69  |
| -0.464057933 | 1.73E-14    | -0.247744279 | 8.88E-05    | 0.928814413  | 9.31E-107 |
| -0.305794842 | 1.06E-06    | -0.040680636 | 0.526238307 | 0.639941843  | 1.26E-29  |
| -0.288824237 | 4.31E-06    | -0.152265446 | 0.017076037 | 0.710377312  | 6.15E-39  |
| -0.280120839 | 8.52E-06    | 0.144315089  | 0.023872468 | 0.86901974   | 3.24E-76  |
| -0.388908848 | 2.86E-10    | -0.233331402 | 0.00022913  | 0.834197969  | 9.45E-65  |
| -0.624727197 | 6.36E-28    | -0.523091596 | 1.31E-18    | 0.736286233  | 4.19E-43  |
| -0.551265136 | 7.05E-21    | -0.318124328 | 3.64E-07    | 0.784314738  | 2.67E-52  |
| -0.392242379 | 1.95E-10    | -0.202446305 | 0.001444386 | 0.881634467  | 3.28E-81  |
| -0.362460309 | 5.09E-09    | -0.182788837 | 0.004095757 | 0.416553071  | 1.06E-11  |
| -0.230415856 | 0.000275621 | -0.153933164 | 0.015886901 | 0.364593842  | 4.07E-09  |
| -0.35820846  | 7.89E-09    | -0.156604093 | 0.014132987 | 0.741328059  | 5.67E-44  |
| -0.509330091 | 1.41E-17    | -0.242894731 | 0.000122971 | 0.875081835  | 1.51E-78  |
| -0.475117218 | 3.36E-15    | -0.332915134 | 9.43E-08    | 0.650737938  | 6.82E-31  |
| -0.36419167  | 4.25E-09    | -0.271273493 | 1.67E-05    | 0.55563414   | 3.00E-21  |
| -0.069136352 | 0.2810734   | 0.089840581  | 0.160953358 | 0.741077448  | 6.27E-44  |
| -0.286282927 | 5.27E-06    | -0.123504956 | 0.05352388  | 0.829285322  | 2.38E-63  |
| -0.304476736 | 1.19E-06    | -0.108455306 | 0.090281902 | 0.787330866  | 5.89E-53  |
| -0.298873675 | 1.90E-06    | -0.245849562 | 0.00010094  | 0.740824885  | 6.93E-44  |
| -0.291681744 | 3.42E-06    | -0.149209492 | 0.019457415 | 0.821052009  | 4.26E-61  |
| -0.507636248 | 1.88E-17    | -0.326357696 | 1.73E-07    | 0.832232639  | 3.48E-64  |
| -0.442539252 | 3.59E-13    | -0.25915233  | 4.03E-05    | 0.854429209  | 4.76E-71  |
| -0.356762847 | 9.15E-09    | -0.156282039 | 0.01433505  | 0.8715472    | 3.57E-77  |
| 0.383340966  | 5.35E-10    | 0.218374955  | 0.000576861 | -0.476318248 | 2.80E-15  |
| -0.331846497 | 1.04E-07    | -0.134636055 | 0.035186177 | 0.8972316    | 3.08E-88  |
| -0.186023559 | 0.003473569 | -0.073222576 | 0.253542711 | 0.850942147  | 6.74E-70  |
| -0.441316247 | 4.23E-13    | -0.306572909 | 9.96E-07    | 0.80191161   | 2.78E-56  |
| -0.301261022 | 1.56E-06    | -0.334862186 | 7.85E-08    | 0.729649836  | 5.43E-42  |
| -0.221045243 | 0.000491357 | -0.101617735 | 0.112615866 | 0.417536476  | 9.37E-12  |
| -0.124450671 | 0.051706502 | 0.047413153  | 0.460056685 | 0.799275835  | 1.16E-55  |
| -0.561123096 | 1.01E-21    | -0.416308118 | 1.09E-11    | 0.776651432  | 1.11E-50  |



|              |             |              |             |              |           |
|--------------|-------------|--------------|-------------|--------------|-----------|
| -0.272881433 | 1.48E-05    | -0.16711809  | 0.008770018 | 0.662986776  | 2.15E-32  |
| -0.320886349 | 2.85E-07    | -0.195715147 | 0.002086905 | 0.719325728  | 2.53E-40  |
| -0.116571122 | 0.068529323 | 0.053861048  | 0.401269139 | 0.646035999  | 2.47E-30  |
| -0.434374514 | 1.07E-12    | -0.208398229 | 0.001033048 | 0.863712542  | 2.88E-74  |
| -0.33810985  | 5.77E-08    | -0.153581136 | 0.016131701 | 0.741120928  | 6.16E-44  |
| -0.425766002 | 3.30E-12    | -0.257453837 | 4.54E-05    | 0.623611565  | 8.40E-28  |
| -0.592652502 | 1.26E-24    | -0.471035936 | 6.20E-15    | 0.800750363  | 5.23E-56  |
| -0.340543451 | 4.57E-08    | -0.234937106 | 0.00020676  | 0.534218475  | 1.76E-19  |
| -0.647287231 | 1.76E-30    | -0.361642683 | 5.54E-09    | 0.804952081  | 5.18E-57  |
| -0.27200883  | 1.58E-05    | -0.152475304 | 0.016922254 | 0.691928829  | 3.06E-36  |
| -0.362310458 | 5.17E-09    | -0.175165004 | 0.005977181 | 0.826466036  | 1.45E-62  |
| -0.559535366 | 1.38E-21    | -0.434999138 | 9.87E-13    | 0.681672011  | 7.94E-35  |
| -0.658168391 | 8.53E-32    | -0.553089853 | 4.94E-21    | 0.731572537  | 2.61E-42  |
| -0.618236228 | 3.17E-27    | -0.280470192 | 8.30E-06    | 0.68265046   | 5.86E-35  |
| -0.722402303 | 8.20E-41    | -0.43385952  | 1.15E-12    | 0.773069545  | 6.03E-50  |
| -0.482855436 | 1.03E-15    | -0.272382005 | 1.53E-05    | 0.848503829  | 4.14E-69  |
| -0.308098355 | 8.74E-07    | -0.136320844 | 0.032940077 | 0.867314891  | 1.40E-75  |
| 0.337434438  | 6.15E-08    | 0.289056016  | 4.23E-06    | -0.664159936 | 1.53E-32  |
| -0.198912535 | 0.001754762 | -0.332505619 | 9.80E-08    | 0.741996932  | 4.33E-44  |
| -0.410263596 | 2.30E-11    | -0.336480325 | 6.74E-08    | 0.844884828  | 5.77E-68  |
| -0.630014666 | 1.67E-28    | -0.456622906 | 5.06E-14    | 0.467497695  | 1.05E-14  |
| -0.591812666 | 1.52E-24    | -0.185784176 | 0.003516501 | 0.794146835  | 1.77E-54  |
| -0.526823839 | 6.73E-19    | -0.248821345 | 8.26E-05    | 0.878790494  | 4.90E-80  |
| -0.225249707 | 0.000380199 | -0.09750046  | 0.128022295 | 0.814095631  | 2.77E-59  |
| -0.381888984 | 6.29E-10    | -0.224466586 | 0.000398946 | 0.563669461  | 6.03E-22  |
| -0.386974858 | 3.56E-10    | -0.204467189 | 0.001290353 | 0.924581983  | 7.99E-104 |
| -0.210618743 | 0.000909464 | -0.082924847 | 0.195813893 | 0.657943991  | 9.09E-32  |
| -0.313511884 | 5.47E-07    | -0.064246896 | 0.316577769 | 0.870020646  | 1.36E-76  |
| 0.405495798  | 4.10E-11    | 0.212415308  | 0.000819603 | -0.466401546 | 1.23E-14  |
| -0.159464346 | 0.012445284 | -0.064495788 | 0.314702739 | 0.520302676  | 2.14E-18  |
| 0.218498299  | 0.000572626 | 0.213953398  | 0.000749252 | -0.612531495 | 1.26E-26  |
| 0.273165988  | 1.45E-05    | 0.069207552  | 0.28057706  | -0.555782461 | 2.91E-21  |
| -0.267883491 | 2.14E-05    | -0.31593554  | 4.42E-07    | 0.485276508  | 7.05E-16  |
| -0.280537035 | 8.25E-06    | -0.033744728 | 0.599140387 | 0.857575185  | 4.10E-72  |
| -0.440575022 | 4.68E-13    | -0.362323534 | 5.16E-09    | 0.630252696  | 1.57E-28  |
| -0.3378035   | 5.94E-08    | -0.24383978  | 0.000115477 | 0.451829124  | 9.96E-14  |
| -0.375008266 | 1.34E-09    | -0.276911759 | 1.09E-05    | 0.776078137  | 1.46E-50  |
| -0.400961997 | 7.05E-11    | -0.181229005 | 0.004430303 | 0.851893931  | 3.29E-70  |
| -0.567671574 | 2.67E-22    | -0.359399856 | 6.98E-09    | 0.728711836  | 7.76E-42  |
| -0.378918652 | 8.74E-10    | -0.144063554 | 0.024121012 | 0.863207092  | 4.37E-74  |

|              |             |              |             |              |          |
|--------------|-------------|--------------|-------------|--------------|----------|
| -0.236336393 | 0.000188945 | -0.087669957 | 0.171352995 | 0.898659969  | 6.14E-89 |
| -0.180668835 | 0.004556326 | -0.064092131 | 0.317747359 | 0.836187941  | 2.48E-65 |
| -0.34359218  | 3.40E-08    | -0.143522551 | 0.024663149 | 0.628267948  | 2.60E-28 |
| -0.149802142 | 0.01897425  | 0.067094534  | 0.295559211 | 0.839339057  | 2.87E-66 |
| -0.221639714 | 0.000473995 | -0.028087251 | 0.661768332 | 0.774159284  | 3.62E-50 |
| -0.612668091 | 1.22E-26    | -0.448997056 | 1.48E-13    | 0.745011296  | 1.28E-44 |
| -0.328012545 | 1.49E-07    | -0.117677703 | 0.065926655 | 0.899743904  | 1.78E-89 |
| -0.088655426 | 0.166571193 | 0.071814382  | 0.262811478 | 0.761814435  | 1.01E-47 |
| -0.279340661 | 9.05E-06    | -0.049057205 | 0.444628804 | 0.786348469  | 9.66E-53 |
| -0.258937663 | 4.09E-05    | -0.126827983 | 0.047363568 | 0.895832983  | 1.46E-87 |
| -0.531489442 | 2.90E-19    | -0.213997125 | 0.000747336 | 0.8134753    | 3.99E-59 |
| -0.176497317 | 0.005600933 | -0.27260758  | 1.51E-05    | 0.57348643   | 7.99E-23 |
| -0.478332323 | 2.06E-15    | -0.333250019 | 9.14E-08    | 0.549050106  | 1.08E-20 |
| -0.364290435 | 4.20E-09    | -0.238176987 | 0.000167689 | 0.738511858  | 1.74E-43 |
| -0.295720922 | 2.47E-06    | -0.229501912 | 0.000291915 | 0.694183381  | 1.47E-36 |
| -0.401376834 | 6.71E-11    | -0.378900588 | 8.76E-10    | 0.787985973  | 4.23E-53 |
| -0.234890479 | 0.00020738  | -0.109069213 | 0.088463632 | 0.837258756  | 1.20E-65 |
| 0.21671082   | 0.000636905 | 0.195884887  | 0.002067924 | -0.365832774 | 3.57E-09 |
| -0.393160037 | 1.76E-10    | -0.311679926 | 6.42E-07    | 0.714974941  | 1.21E-39 |
| 0.035774152  | 0.57734377  | -0.012213564 | 0.849150895 | 0.607193448  | 4.49E-26 |
| -0.237174773 | 0.000178969 | -0.100146021 | 0.117946874 | 0.588159296  | 3.42E-24 |
| 0.563328082  | 6.46E-22    | 0.477954902  | 2.18E-15    | -0.703322074 | 7.00E-38 |
| -0.126443854 | 0.048043922 | -0.081010818 | 0.206368958 | 0.774154875  | 3.62E-50 |
| -0.298642096 | 1.94E-06    | -0.150043137 | 0.018780778 | 0.905562056  | 1.80E-92 |
| -0.329693532 | 1.27E-07    | -0.125202359 | 0.050298852 | 0.856190649  | 1.21E-71 |
| -0.642110541 | 7.09E-30    | -0.482038093 | 1.17E-15    | 0.750584298  | 1.27E-45 |
| -0.203388572 | 0.001370583 | -0.184801502 | 0.003697808 | 0.714143788  | 1.63E-39 |
| -0.424666023 | 3.80E-12    | -0.300849902 | 1.61E-06    | 0.754209795  | 2.75E-46 |
| -0.328319968 | 1.45E-07    | -0.288693516 | 4.35E-06    | 0.729586533  | 5.57E-42 |
| -0.152666637 | 0.0167831   | -0.14998671  | 0.018825923 | 0.662606733  | 2.40E-32 |
| -0.360883722 | 5.99E-09    | -0.195666306 | 0.002092395 | 0.87002102   | 1.36E-76 |
| -0.463005194 | 2.02E-14    | -0.297890482 | 2.06E-06    | 0.680213083  | 1.25E-34 |
| -0.588297806 | 3.32E-24    | -0.238154697 | 0.000167933 | 0.661907259  | 2.93E-32 |
| -0.303483269 | 1.29E-06    | -0.209471993 | 0.000971477 | 0.722697169  | 7.35E-41 |
| -0.23722599  | 0.000178375 | -0.021609382 | 0.736456264 | 0.814919489  | 1.71E-59 |
| -0.232029604 | 0.000248903 | 0.087700703  | 0.171202279 | 0.536164372  | 1.23E-19 |
| -0.408104763 | 2.99E-11    | -0.360828201 | 6.02E-09    | 0.6946981    | 1.24E-36 |
| -0.395578871 | 1.33E-10    | -0.282939353 | 6.85E-06    | 0.81081872   | 1.87E-58 |
| -0.0912474   | 0.154470865 | 0.023016731  | 0.719988705 | 0.368201082  | 2.78E-09 |
| -0.405194539 | 4.26E-11    | -0.24758287  | 8.98E-05    | 0.85447393   | 4.60E-71 |

|              |             |              |             |              |           |
|--------------|-------------|--------------|-------------|--------------|-----------|
| -0.424482786 | 3.89E-12    | -0.244065401 | 0.000113752 | 0.914077724  | 3.16E-97  |
| -0.152078195 | 0.01721428  | -0.068034886 | 0.288827223 | 0.613570629  | 9.84E-27  |
| -0.365672285 | 3.63E-09    | -0.177855073 | 0.005239484 | 0.773416491  | 5.13E-50  |
| -0.391615933 | 2.10E-10    | -0.24305155  | 0.000121696 | 0.619460443  | 2.35E-27  |
| -0.54475045  | 2.47E-20    | -0.317800391 | 3.75E-07    | 0.675486927  | 5.31E-34  |
| 0.36945316   | 2.44E-09    | 0.174363939  | 0.006214151 | -0.533605802 | 1.97E-19  |
| -0.211950332 | 0.000842039 | -0.008328267 | 0.89680885  | 0.601897649  | 1.54E-25  |
| -0.33614251  | 6.96E-08    | -0.368599543 | 2.67E-09    | 0.785986999  | 1.16E-52  |
| -0.205729547 | 0.001201939 | -0.095381183 | 0.136563035 | 0.493786368  | 1.83E-16  |
| -0.510278218 | 1.20E-17    | -0.331134993 | 1.11E-07    | 0.862264161  | 9.48E-74  |
| -0.372654849 | 1.73E-09    | -0.243826083 | 0.000115582 | 0.687900148  | 1.12E-35  |
| -0.304439044 | 1.19E-06    | -0.237507515 | 0.000175147 | 0.643854869  | 4.44E-30  |
| -0.329630998 | 1.28E-07    | -0.297228362 | 2.18E-06    | 0.618647157  | 2.87E-27  |
| -0.06210617  | 0.333005038 | 0.046881214  | 0.465111442 | 0.405568734  | 4.07E-11  |
| -0.40946426  | 2.54E-11    | -0.315613502 | 4.55E-07    | 0.564911842  | 4.68E-22  |
| 0.281548768  | 7.63E-06    | 0.424712288  | 3.77E-12    | -0.541467943 | 4.59E-20  |
| -0.292134298 | 3.30E-06    | -0.071459364 | 0.265184452 | 0.823383055  | 1.01E-61  |
| -0.00624112  | 0.922575235 | -0.003219328 | 0.960016498 | 0.58515681   | 6.60E-24  |
| -0.332141649 | 1.01E-07    | -0.212592856 | 0.000811182 | 0.485493185  | 6.81E-16  |
| -0.477709633 | 2.27E-15    | -0.265373917 | 2.57E-05    | 0.910271159  | 4.82E-95  |
| -0.643714817 | 4.61E-30    | -0.488459069 | 4.27E-16    | 0.840249473  | 1.53E-66  |
| -0.257470143 | 4.53E-05    | -0.226950729 | 0.000342263 | 0.675789041  | 4.84E-34  |
| -0.349975013 | 1.81E-08    | -0.19722737  | 0.001923262 | 0.883798958  | 4.00E-82  |
| -0.567399696 | 2.82E-22    | -0.404469443 | 4.64E-11    | 0.806636594  | 2.02E-57  |
| -0.422926372 | 4.74E-12    | -0.197971923 | 0.001847072 | 0.947810718  | 1.25E-122 |
| -0.519018894 | 2.67E-18    | -0.296893388 | 2.24E-06    | 0.5060449    | 2.45E-17  |
| -0.233290661 | 0.000229726 | -0.087363234 | 0.172861955 | 0.508872948  | 1.53E-17  |
| -0.458385258 | 3.93E-14    | -0.323085704 | 2.33E-07    | 0.747463554  | 4.66E-45  |
| -0.236753047 | 0.000183924 | -0.111369734 | 0.081909393 | 0.718996829  | 2.85E-40  |
| -0.246982767 | 9.35E-05    | -0.050752862 | 0.429028534 | 0.669548887  | 3.15E-33  |
| -0.12948484  | 0.042874984 | 0.329740339  | 1.27E-07    | 0.579138939  | 2.42E-23  |
| -0.512095664 | 8.83E-18    | -0.350113846 | 1.79E-08    | 0.595072387  | 7.33E-25  |
| -0.067252585 | 0.294420481 | 0.042392146  | 0.508967902 | 0.459585447  | 3.31E-14  |
| -0.457420098 | 4.52E-14    | -0.137559512 | 0.031367591 | 0.713052144  | 2.40E-39  |
| -0.249898493 | 7.67E-05    | -0.005878373 | 0.927062471 | 0.853891147  | 7.20E-71  |
| -0.410317857 | 2.29E-11    | -0.241742495 | 0.000132724 | 0.848072533  | 5.69E-69  |
| -0.397632617 | 1.04E-10    | -0.079875509 | 0.212820509 | 0.898954958  | 4.39E-89  |
| -0.506774264 | 2.17E-17    | -0.276755428 | 1.10E-05    | 0.933235375  | 5.06E-110 |
| -0.298477554 | 1.97E-06    | -0.221007452 | 0.00049248  | 0.665092637  | 1.17E-32  |
| -0.370847325 | 2.10E-09    | -0.320497316 | 2.95E-07    | 0.664971321  | 1.21E-32  |

|              |          |              |             |              |             |
|--------------|----------|--------------|-------------|--------------|-------------|
| -0.271144636 | 1.68E-05 | -0.068136723 | 0.288104388 | 0.823825448  | 7.65E-62    |
| 0.633354421  | 7.07E-29 | 0.438748388  | 5.99E-13    | -0.680799305 | 1.04E-34    |
| 0.384102657  | 4.92E-10 | 0.303236917  | 1.32E-06    | -0.586982646 | 4.43E-24    |
| 0.530021377  | 3.79E-19 | 0.436306087  | 8.30E-13    | -0.15856178  | 0.012957605 |
| 0.772771674  | 6.93E-50 | 0.50501384   | 2.91E-17    | -0.432545978 | 1.36E-12    |
| 0.769831055  | 2.71E-49 | 0.561695019  | 8.98E-22    | -0.553627196 | 4.45E-21    |
| 0.562050197  | 8.36E-22 | 0.274632728  | 1.30E-05    | -0.228532745 | 0.000310169 |
| 0.758400429  | 4.52E-47 | 0.413470902  | 1.55E-11    | -0.204219181 | 0.00130841  |
| 0.720968853  | 1.39E-40 | 0.560236501  | 1.20E-21    | -0.315892301 | 4.44E-07    |
| 0.671316669  | 1.86E-33 | 0.327773585  | 1.52E-07    | -0.310556985 | 7.08E-07    |
| 0.675860021  | 4.74E-34 | 0.591488921  | 1.64E-24    | -0.548309762 | 1.25E-20    |
| 0.739414308  | 1.22E-43 | 0.446084541  | 2.21E-13    | -0.507486444 | 1.93E-17    |
| 0.809759705  | 3.43E-58 | 0.602486239  | 1.35E-25    | -0.431675799 | 1.53E-12    |
| 0.744011594  | 1.92E-44 | 0.42576454   | 3.30E-12    | -0.418244931 | 8.57E-12    |
| 0.72405543   | 4.45E-41 | 0.353283987  | 1.30E-08    | -0.034047275 | 0.595867518 |
| 0.840513614  | 1.27E-66 | 0.512070897  | 8.87E-18    | -0.516801954 | 3.93E-18    |
| 0.689969514  | 5.77E-36 | 0.450003855  | 1.28E-13    | -0.383909138 | 5.03E-10    |
| 0.872404355  | 1.67E-77 | 0.566892467  | 3.13E-22    | -0.451818761 | 9.97E-14    |
| 0.80781326   | 1.04E-57 | 0.425662142  | 3.34E-12    | -0.396318134 | 1.22E-10    |
| 0.7447229    | 1.44E-44 | 0.443249267  | 3.26E-13    | -0.428948026 | 2.18E-12    |
| 0.645356342  | 2.96E-30 | 0.51989502   | 2.30E-18    | -0.315652852 | 4.53E-07    |
| 0.807671134  | 1.13E-57 | 0.440267653  | 4.88E-13    | -0.259000171 | 4.07E-05    |
| 0.745707319  | 9.60E-45 | 0.384092808  | 4.92E-10    | -0.401286108 | 6.79E-11    |
| 0.692505473  | 2.54E-36 | 0.280576636  | 8.23E-06    | -0.330064888 | 1.23E-07    |
| 0.687782095  | 1.16E-35 | 0.433529906  | 1.20E-12    | -0.261622404 | 3.38E-05    |
| 0.742962534  | 2.93E-44 | 0.465050353  | 1.50E-14    | -0.187331577 | 0.003247248 |
| 0.650431156  | 7.42E-31 | 0.593802247  | 9.76E-25    | -0.445903287 | 2.27E-13    |
| 0.740494248  | 7.91E-44 | 0.338876102  | 5.36E-08    | -0.385468861 | 4.22E-10    |
| 0.723075313  | 6.39E-41 | 0.449527561  | 1.37E-13    | -0.334289792 | 8.29E-08    |
| 0.563413473  | 6.35E-22 | 0.282965702  | 6.84E-06    | -0.139067691 | 0.029539779 |
| 0.861114706  | 2.42E-73 | 0.548362193  | 1.24E-20    | -0.47116947  | 6.07E-15    |
| 0.566743007  | 3.22E-22 | 0.140694689  | 0.027670816 | -0.244373417 | 0.000111437 |
| 0.477715438  | 2.26E-15 | 0.214645159  | 0.000719466 | -0.195272145 | 0.002137192 |
| 0.594211556  | 8.90E-25 | 0.340516514  | 4.58E-08    | -0.211161516 | 0.000881402 |
| 0.769231598  | 3.57E-49 | 0.340626308  | 4.53E-08    | -0.29491237  | 2.64E-06    |
| 0.70905355   | 9.76E-39 | 0.517856786  | 3.27E-18    | -0.256012148 | 5.02E-05    |
| 0.652678284  | 3.99E-31 | 0.313175379  | 5.63E-07    | -0.364187665 | 4.25E-09    |
| 0.805047272  | 4.92E-57 | 0.445773236  | 2.31E-13    | -0.532494069 | 2.42E-19    |
| 0.585304133  | 6.39E-24 | 0.427234567  | 2.73E-12    | -0.312566487 | 5.94E-07    |
| 0.740318042  | 8.49E-44 | 0.560791075  | 1.08E-21    | -0.51970575  | 2.37E-18    |

|             |          |             |             |              |             |
|-------------|----------|-------------|-------------|--------------|-------------|
| 0.484009634 | 8.58E-16 | 0.205925393 | 0.001188732 | -0.333331054 | 9.07E-08    |
| 0.666188136 | 8.47E-33 | 0.522136502 | 1.55E-18    | -0.546552224 | 1.75E-20    |
| 0.821309261 | 3.63E-61 | 0.428831837 | 2.22E-12    | -0.254801348 | 5.47E-05    |
| 0.646051237 | 2.46E-30 | 0.303711655 | 1.27E-06    | -0.52969283  | 4.02E-19    |
| 0.582855958 | 1.09E-23 | 0.173244491 | 0.006559385 | -0.292358895 | 3.24E-06    |
| 0.801791929 | 2.96E-56 | 0.354867117 | 1.11E-08    | -0.159454748 | 0.012450636 |
| 0.840945991 | 9.40E-67 | 0.52498793  | 9.34E-19    | -0.442372473 | 3.67E-13    |
| 0.734325221 | 9.00E-43 | 0.518928348 | 2.72E-18    | -0.226627801 | 0.000349183 |
| 0.739530586 | 1.16E-43 | 0.413750669 | 1.50E-11    | -0.301234127 | 1.56E-06    |
| 0.730061825 | 4.64E-42 | 0.449374808 | 1.40E-13    | -0.280618648 | 8.20E-06    |
| 0.792554788 | 4.07E-54 | 0.357035165 | 8.90E-09    | -0.472017561 | 5.35E-15    |
| 0.77709912  | 8.97E-51 | 0.398529347 | 9.40E-11    | -0.526036566 | 7.75E-19    |
| 0.755398536 | 1.65E-46 | 0.27082418  | 1.72E-05    | -0.345592075 | 2.80E-08    |
| 0.648138866 | 1.39E-30 | 0.38615433  | 3.91E-10    | -0.191335576 | 0.002634984 |
| 0.830226807 | 1.29E-63 | 0.543838019 | 2.93E-20    | -0.453390236 | 8.00E-14    |
| 0.678513847 | 2.11E-34 | 0.357131812 | 8.81E-09    | -0.19585064  | 0.002071741 |
| 0.777338306 | 8.00E-51 | 0.204733774 | 0.0012712   | -0.334110957 | 8.43E-08    |
| 0.703971169 | 5.61E-38 | 0.391683816 | 2.08E-10    | -0.480933868 | 1.38E-15    |
| 0.847079796 | 1.18E-68 | 0.537872126 | 8.98E-20    | -0.407925071 | 3.06E-11    |
| 0.791647349 | 6.51E-54 | 0.327242402 | 1.60E-07    | -0.309189907 | 7.96E-07    |
| 0.542559176 | 3.73E-20 | 0.223172168 | 0.000431825 | -0.112061033 | 0.080018225 |
| 0.756115464 | 1.22E-46 | 0.49906557  | 7.78E-17    | -0.284604065 | 6.01E-06    |
| 0.79223682  | 4.80E-54 | 0.530001023 | 3.80E-19    | -0.422307609 | 5.13E-12    |
| 0.766768609 | 1.10E-48 | 0.276013721 | 1.17E-05    | -0.358291225 | 7.82E-09    |
| 0.611498958 | 1.62E-26 | 0.305479508 | 1.09E-06    | -0.298674113 | 1.93E-06    |
| 0.775913825 | 1.58E-50 | 0.732633367 | 1.73E-42    | -0.239973382 | 0.000149118 |
| 0.757779726 | 5.92E-47 | 0.597467405 | 4.26E-25    | -0.255102505 | 5.35E-05    |
| 0.79149878  | 7.03E-54 | 0.471487294 | 5.79E-15    | -0.306991742 | 9.61E-07    |
| 0.710536115 | 5.82E-39 | 0.375030542 | 1.34E-09    | -0.446625037 | 2.05E-13    |
| 0.678228287 | 2.30E-34 | 0.295313238 | 2.55E-06    | -0.395763688 | 1.30E-10    |
| 0.69348318  | 1.85E-36 | 0.358323187 | 7.80E-09    | -0.422020488 | 5.32E-12    |
| 0.711500491 | 4.15E-39 | 0.549383921 | 1.02E-20    | -0.334789592 | 7.91E-08    |
| 0.67084397  | 2.14E-33 | 0.371527051 | 1.95E-09    | -0.44075813  | 4.57E-13    |
| 0.843530782 | 1.52E-67 | 0.541037147 | 4.97E-20    | -0.524371951 | 1.04E-18    |
| 0.67077293  | 2.19E-33 | 0.377955099 | 9.72E-10    | -0.176622021 | 0.005566826 |
| 0.796454446 | 5.25E-55 | 0.57120976  | 1.28E-22    | -0.448832397 | 1.51E-13    |
| 0.707908792 | 1.45E-38 | 0.468317212 | 9.28E-15    | -0.337937305 | 5.86E-08    |
| 0.624696174 | 6.41E-28 | 0.179884653 | 0.004738167 | -0.378838781 | 8.82E-10    |
| 0.747260634 | 5.07E-45 | 0.549963903 | 9.08E-21    | -0.263199986 | 3.01E-05    |
| 0.547525428 | 1.45E-20 | 0.258592501 | 4.19E-05    | -0.528205537 | 5.25E-19    |

|             |          |             |             |              |             |
|-------------|----------|-------------|-------------|--------------|-------------|
| 0.730924975 | 3.34E-42 | 0.407340945 | 3.29E-11    | -0.408238829 | 2.95E-11    |
| 0.690797604 | 4.42E-36 | 0.389332326 | 2.72E-10    | -0.215420276 | 0.000687392 |
| 0.730485281 | 3.95E-42 | 0.508315895 | 1.68E-17    | -0.359091692 | 7.21E-09    |
| 0.80694594  | 1.70E-57 | 0.527804844 | 5.65E-19    | -0.393964568 | 1.60E-10    |
| 0.766185154 | 1.43E-48 | 0.674211401 | 7.81E-34    | -0.279182711 | 9.16E-06    |
| 0.756299803 | 1.12E-46 | 0.268118537 | 2.11E-05    | -0.326703399 | 1.68E-07    |
| 0.637465191 | 2.42E-29 | 0.4408442   | 4.51E-13    | -0.324779134 | 2.00E-07    |
| 0.767644531 | 7.39E-49 | 0.381619878 | 6.49E-10    | -0.468084608 | 9.60E-15    |
| 0.802352309 | 2.18E-56 | 0.469838    | 7.41E-15    | -0.495833848 | 1.32E-16    |
| 0.812463932 | 7.20E-59 | 0.613853017 | 9.20E-27    | -0.390676254 | 2.34E-10    |
| 0.603395235 | 1.09E-25 | 0.203340818 | 0.001374239 | -0.415917178 | 1.15E-11    |
| 0.615390934 | 6.34E-27 | 0.30224335  | 1.44E-06    | -0.325319031 | 1.91E-07    |
| 0.496730465 | 1.14E-16 | 0.165009803 | 0.009671346 | -0.300975593 | 1.60E-06    |
| 0.524977528 | 9.36E-19 | 0.282228178 | 7.24E-06    | -0.153115958 | 0.016460235 |
| 0.82278696  | 1.46E-61 | 0.414274368 | 1.41E-11    | -0.439095558 | 5.71E-13    |
| 0.739896459 | 1.00E-43 | 0.383970952 | 4.99E-10    | -0.352776935 | 1.37E-08    |
| 0.745658487 | 9.79E-45 | 0.644897451 | 3.35E-30    | -0.407838475 | 3.09E-11    |
| 0.698650771 | 3.37E-37 | 0.503350294 | 3.84E-17    | -0.343181675 | 3.54E-08    |
| 0.816559618 | 6.45E-60 | 0.699992001 | 2.15E-37    | -0.424229764 | 4.01E-12    |
| 0.683287351 | 4.80E-35 | 0.334866965 | 7.85E-08    | -0.348316407 | 2.14E-08    |
| 0.707785945 | 1.51E-38 | 0.317298439 | 3.92E-07    | -0.414688663 | 1.34E-11    |
| 0.520455034 | 2.08E-18 | 0.367845811 | 2.89E-09    | -0.116143369 | 0.069557626 |
| 0.731246767 | 2.95E-42 | 0.452850773 | 8.63E-14    | -0.353680019 | 1.25E-08    |
| 0.660008905 | 5.05E-32 | 0.314375046 | 5.07E-07    | -0.355892454 | 9.99E-09    |
| 0.726830029 | 1.58E-41 | 0.400923854 | 7.08E-11    | -0.322220383 | 2.52E-07    |
| 0.816496357 | 6.69E-60 | 0.409809239 | 2.43E-11    | -0.388274028 | 3.07E-10    |
| 0.628932077 | 2.20E-28 | 0.328616044 | 1.41E-07    | -0.449259511 | 1.42E-13    |
| 0.725553365 | 2.55E-41 | 0.47479973  | 3.52E-15    | -0.082336466 | 0.199015837 |
| 0.767771485 | 6.97E-49 | 0.393893737 | 1.61E-10    | -0.274607946 | 1.30E-05    |
| 0.660830555 | 3.99E-32 | 0.427220882 | 2.73E-12    | -0.314920245 | 4.84E-07    |
| 0.804685078 | 6.01E-57 | 0.651646672 | 5.30E-31    | -0.468715628 | 8.75E-15    |
| 0.504996813 | 2.92E-17 | 0.42201826  | 5.32E-12    | -0.190447536 | 0.002760927 |
| 0.564086289 | 5.54E-22 | 0.330201615 | 1.22E-07    | -0.289753134 | 4.00E-06    |
| 0.877891085 | 1.14E-79 | 0.475060783 | 3.39E-15    | -0.440374899 | 4.81E-13    |
| 0.740312696 | 8.51E-44 | 0.407178147 | 3.35E-11    | -0.306849363 | 9.73E-07    |
| 0.818261276 | 2.32E-60 | 0.282391872 | 7.15E-06    | -0.372501298 | 1.76E-09    |
| 0.825333146 | 2.97E-62 | 0.662975584 | 2.16E-32    | -0.508556325 | 1.61E-17    |
| 0.810379753 | 2.40E-58 | 0.442383822 | 3.66E-13    | -0.341560267 | 4.14E-08    |
| 0.777432395 | 7.64E-51 | 0.490789342 | 2.95E-16    | -0.370513055 | 2.18E-09    |
| 0.63238811  | 9.08E-29 | 0.26823522  | 2.09E-05    | -0.363784658 | 4.43E-09    |

|             |          |             |             |              |             |
|-------------|----------|-------------|-------------|--------------|-------------|
| 0.841376942 | 6.96E-67 | 0.559969621 | 1.27E-21    | -0.340606402 | 4.54E-08    |
| 0.785891341 | 1.22E-52 | 0.533599399 | 1.97E-19    | -0.211701754 | 0.000854265 |
| 0.670162438 | 2.62E-33 | 0.400991052 | 7.03E-11    | -0.294241502 | 2.78E-06    |
| 0.788730981 | 2.90E-53 | 0.418587773 | 8.21E-12    | -0.383791886 | 5.09E-10    |
| 0.552738197 | 5.30E-21 | 0.245267884 | 0.000104961 | -0.305796455 | 1.06E-06    |
| 0.598537532 | 3.34E-25 | 0.431632457 | 1.54E-12    | 0.083631688  | 0.192017118 |
| 0.619141355 | 2.54E-27 | 0.32532781  | 1.90E-07    | -0.164736018 | 0.00979422  |
| 0.767303628 | 8.62E-49 | 0.542855424 | 3.53E-20    | -0.226095593 | 0.000360871 |
| 0.733826843 | 1.09E-42 | 0.246656362 | 9.56E-05    | -0.195301001 | 0.002133883 |
| 0.652151892 | 4.61E-31 | 0.341551026 | 4.14E-08    | -0.362567182 | 5.03E-09    |
| 0.761796052 | 1.02E-47 | 0.590082433 | 2.24E-24    | -0.436040032 | 8.60E-13    |
| 0.659806084 | 5.35E-32 | 0.541782125 | 4.32E-20    | -0.276811162 | 1.10E-05    |
| 0.547903191 | 1.35E-20 | 0.343938066 | 3.29E-08    | -0.634780564 | 4.89E-29    |
| 0.700873066 | 1.60E-37 | 0.394059013 | 1.58E-10    | -0.391686231 | 2.08E-10    |
| 0.635183247 | 4.40E-29 | 0.290039708 | 3.91E-06    | -0.373212702 | 1.63E-09    |
| 0.838204792 | 6.28E-66 | 0.438495349 | 6.19E-13    | -0.258383498 | 4.25E-05    |
| 0.567900501 | 2.54E-22 | 0.321380467 | 2.72E-07    | -0.245540525 | 0.000103058 |
| 0.455283239 | 6.12E-14 | 0.301373099 | 1.55E-06    | -0.077333999 | 0.227784649 |
| 0.666290013 | 8.22E-33 | 0.379763993 | 7.96E-10    | -0.35218376  | 1.45E-08    |
| 0.626640357 | 3.93E-28 | 0.502616544 | 4.34E-17    | -0.296002536 | 2.41E-06    |
| 0.46176675  | 2.42E-14 | 0.27207887  | 1.57E-05    | 0.057754534  | 0.368051112 |
| 0.795574639 | 8.37E-55 | 0.591772076 | 1.54E-24    | -0.383986035 | 4.98E-10    |
| 0.697199607 | 5.45E-37 | 0.562631455 | 7.43E-22    | -0.519315726 | 2.54E-18    |
| 0.586892581 | 4.52E-24 | 0.173545627 | 0.006464869 | -0.419045492 | 7.75E-12    |
| 0.565117371 | 4.49E-22 | 0.32723017  | 1.60E-07    | -0.303998839 | 1.24E-06    |
| 0.605198212 | 7.17E-26 | 0.494148144 | 1.73E-16    | -0.2555876   | 5.18E-05    |
| 0.695555859 | 9.38E-37 | 0.534273931 | 1.74E-19    | -0.411749675 | 1.92E-11    |
| 0.78425458  | 2.75E-52 | 0.29941632  | 1.82E-06    | -0.335097901 | 7.68E-08    |
| 0.763040461 | 5.87E-48 | 0.429124302 | 2.13E-12    | -0.32837246  | 1.44E-07    |
| 0.763646974 | 4.48E-48 | 0.321223758 | 2.76E-07    | -0.138047227 | 0.030766241 |
| 0.605057408 | 7.41E-26 | 0.370480265 | 2.18E-09    | -0.027781699 | 0.665223979 |
| 0.631659613 | 1.09E-28 | 0.511050678 | 1.06E-17    | -0.247497233 | 9.03E-05    |
| 0.657790329 | 9.50E-32 | 0.489785178 | 3.47E-16    | -0.447827636 | 1.74E-13    |
| 0.786860973 | 7.47E-53 | 0.334210962 | 8.35E-08    | -0.351473726 | 1.56E-08    |
| 0.782715404 | 5.88E-52 | 0.604621542 | 8.20E-26    | -0.507203568 | 2.02E-17    |
| 0.649609589 | 9.30E-31 | 0.302584358 | 1.40E-06    | -0.360419603 | 6.28E-09    |
| 0.737182386 | 2.94E-43 | 0.372524159 | 1.75E-09    | -0.375647406 | 1.25E-09    |
| 0.812360401 | 7.65E-59 | 0.324629403 | 2.03E-07    | -0.420582288 | 6.38E-12    |
| 0.748599837 | 2.91E-45 | 0.517266136 | 3.63E-18    | -0.56963035  | 1.78E-22    |
| 0.694636445 | 1.27E-36 | 0.286638056 | 5.12E-06    | -0.494479324 | 1.64E-16    |

|             |             |             |          |              |             |
|-------------|-------------|-------------|----------|--------------|-------------|
| 0.656184768 | 1.49E-31    | 0.412801273 | 1.69E-11 | -0.449053852 | 1.47E-13    |
| 0.505331486 | 2.76E-17    | 0.437752395 | 6.84E-13 | -0.228549545 | 0.000309844 |
| 0.332788086 | 9.55E-08    | 0.725854307 | 2.28E-41 | -0.036622205 | 0.568346703 |
| 0.347488162 | 2.32E-08    | 0.437569468 | 7.01E-13 | -0.386517625 | 3.75E-10    |
| 0.358667404 | 7.53E-09    | 0.60403368  | 9.41E-26 | -0.037193629 | 0.562322244 |
| 0.487417906 | 5.04E-16    | 0.656111126 | 1.53E-31 | -0.251407247 | 6.92E-05    |
| 0.596615923 | 5.17E-25    | 0.871815315 | 2.82E-77 | -0.344425776 | 3.13E-08    |
| 0.377096673 | 1.07E-09    | 0.807174361 | 1.49E-57 | -0.168223221 | 0.008328021 |
| 0.441356451 | 4.21E-13    | 0.870367995 | 1.00E-76 | -0.272118279 | 1.57E-05    |
| 0.526937705 | 6.60E-19    | 0.770383226 | 2.10E-49 | -0.386944642 | 3.57E-10    |
| 0.655409296 | 1.86E-31    | 0.747765388 | 4.12E-45 | -0.419781524 | 7.06E-12    |
| 0.408667484 | 2.80E-11    | 0.648570843 | 1.24E-30 | -0.11071433  | 0.083735478 |
| 0.736762044 | 3.47E-43    | 0.775075978 | 2.35E-50 | -0.362740493 | 4.94E-09    |
| 0.387039213 | 3.53E-10    | 0.474618917 | 3.62E-15 | -0.168999519 | 0.008029496 |
| 0.354043042 | 1.21E-08    | 0.801784562 | 2.98E-56 | -0.06479919  | 0.312426894 |
| -0.37595724 | 1.21E-09    | -0.42079371 | 6.22E-12 | -0.181878032 | 0.004288222 |
| 0.615244241 | 6.57E-27    | 0.760264382 | 2.00E-47 | 0.003456689  | 0.957071244 |
| 0.254031723 | 5.77E-05    | 0.512506992 | 8.23E-18 | -0.155087041 | 0.015107112 |
| 0.23332269  | 0.000229258 | 0.814367169 | 2.36E-59 | 0.052954263  | 0.409254864 |
| 0.377600543 | 1.01E-09    | 0.513787533 | 6.61E-18 | -0.293617113 | 2.93E-06    |
| 0.328918077 | 1.37E-07    | 0.716347015 | 7.41E-40 | -0.143345663 | 0.024842668 |
| 0.24525361  | 0.000105061 | 0.750812818 | 1.16E-45 | -0.110972062 | 0.083013514 |
| 0.55634869  | 2.61E-21    | 0.766995471 | 9.92E-49 | -0.339718056 | 4.94E-08    |
| 0.448603536 | 1.56E-13    | 0.808601841 | 6.65E-58 | -0.14791779  | 0.020547639 |
| 0.488925952 | 3.97E-16    | 0.786058272 | 1.12E-52 | -0.191600328 | 0.00259846  |
| 0.133109549 | 0.037332151 | 0.452009921 | 9.71E-14 | -0.190778556 | 0.002713356 |
| 0.545698471 | 2.06E-20    | 0.800263914 | 6.81E-56 | -0.026444802 | 0.68042604  |
| 0.43248038  | 1.38E-12    | 0.820279276 | 6.83E-61 | 0.008196656  | 0.898430721 |
| 0.59355195  | 1.03E-24    | 0.832368461 | 3.18E-64 | -0.02433564  | 0.704672164 |
| 0.489486571 | 3.63E-16    | 0.691547651 | 3.47E-36 | -0.01277656  | 0.84228607  |
| 0.270624149 | 1.75E-05    | 0.70186332  | 1.15E-37 | -0.398283099 | 9.67E-11    |
| 0.40719451  | 3.34E-11    | 0.862429386 | 8.28E-74 | -0.391556806 | 2.11E-10    |
| 0.415584549 | 1.19E-11    | 0.66318143  | 2.03E-32 | -0.101002265 | 0.11482186  |
| 0.351073699 | 1.62E-08    | 0.623703613 | 8.21E-28 | -0.443215729 | 3.27E-13    |
| 0.611806894 | 1.50E-26    | 0.684511272 | 3.27E-35 | -0.339019548 | 5.29E-08    |
| 0.412290807 | 1.80E-11    | 0.627540845 | 3.13E-28 | -0.144685691 | 0.023510295 |
| 0.361982291 | 5.35E-09    | 0.838926295 | 3.82E-66 | -0.054364567 | 0.396875267 |
| 0.598281629 | 3.54E-25    | 0.881717638 | 3.03E-81 | -0.366767509 | 3.24E-09    |
| 0.27709368  | 1.07E-05    | 0.715596493 | 9.70E-40 | -0.226870289 | 0.000343975 |
| 0.623132661 | 9.47E-28    | 0.81057914  | 2.14E-58 | -0.403170376 | 5.42E-11    |



|             |             |             |          |              |             |
|-------------|-------------|-------------|----------|--------------|-------------|
| 0.441193516 | 4.31E-13    | 0.578846472 | 2.57E-23 | -0.263106036 | 3.03E-05    |
| 0.458542048 | 3.85E-14    | 0.668051671 | 4.90E-33 | -0.121389468 | 0.057781628 |
| 0.466610489 | 1.19E-14    | 0.61997297  | 2.07E-27 | -0.044846717 | 0.484724582 |
| 0.429556444 | 2.02E-12    | 0.80547859  | 3.87E-57 | -0.137828548 | 0.031034643 |
| 0.463306565 | 1.93E-14    | 0.833535727 | 1.47E-64 | -0.003100368 | 0.961492793 |
| 0.465986569 | 1.31E-14    | 0.823170339 | 1.15E-61 | -0.290614544 | 3.73E-06    |
| 0.529027353 | 4.53E-19    | 0.84210551  | 4.17E-67 | -0.377019108 | 1.08E-09    |
| 0.493398919 | 1.95E-16    | 0.698217359 | 3.89E-37 | -0.408268047 | 2.94E-11    |
| 0.425638739 | 3.35E-12    | 0.905094391 | 3.18E-92 | -0.221108218 | 0.00048949  |
| 0.690576757 | 4.74E-36    | 0.797056313 | 3.82E-55 | -0.419243618 | 7.56E-12    |
| 0.465006039 | 1.51E-14    | 0.819999372 | 8.10E-61 | -0.211986623 | 0.000840268 |
| 0.429367185 | 2.07E-12    | 0.676223817 | 4.24E-34 | -0.361231474 | 5.78E-09    |
| 0.255872865 | 5.07E-05    | 0.467981282 | 9.75E-15 | -0.310171436 | 7.31E-07    |
| 0.440314461 | 4.85E-13    | 0.767862134 | 6.69E-49 | -0.137404937 | 0.03156026  |
| 0.326146415 | 1.77E-07    | 0.633201966 | 7.36E-29 | -0.420524304 | 6.43E-12    |
| 0.528765231 | 4.75E-19    | 0.877424058 | 1.75E-79 | -0.166009466 | 0.009234219 |
| 0.497234143 | 1.05E-16    | 0.53409012  | 1.80E-19 | -0.265522837 | 2.55E-05    |
| 0.627949041 | 2.82E-28    | 0.803775498 | 9.96E-57 | -0.222327507 | 0.000454617 |
| 0.249087521 | 8.11E-05    | 0.843203168 | 1.92E-67 | 0.015872393  | 0.804763293 |
| 0.33322735  | 9.16E-08    | 0.606824314 | 4.90E-26 | -0.126315208 | 0.04827359  |
| 0.375999575 | 1.20E-09    | 0.691588247 | 3.42E-36 | 0.030149701  | 0.638633085 |
| 0.38504547  | 4.42E-10    | 0.858977884 | 1.35E-72 | -0.185404583 | 0.003585562 |
| 0.22052781  | 0.000506947 | 0.650348443 | 7.59E-31 | -0.089660016 | 0.16179996  |
| 0.264127016 | 2.82E-05    | 0.755532707 | 1.56E-46 | -0.184514489 | 0.003752334 |
| 0.599253825 | 2.84E-25    | 0.59253642  | 1.30E-24 | -0.19130854  | 0.00263874  |
| 0.761898483 | 9.75E-48    | 0.749175085 | 2.29E-45 | -0.225999477 | 0.000363021 |
| 0.559777147 | 1.32E-21    | 0.824503045 | 5.01E-62 | -0.374318964 | 1.44E-09    |
| 0.450751392 | 1.16E-13    | 0.773910845 | 4.06E-50 | -0.187591622 | 0.003203878 |
| 0.697147266 | 5.55E-37    | 0.755829044 | 1.38E-46 | -0.247051477 | 9.31E-05    |
| 0.391042284 | 2.24E-10    | 0.834121493 | 9.95E-65 | -0.279305232 | 9.08E-06    |
| 0.46760338  | 1.03E-14    | 0.817739023 | 3.18E-60 | -0.415202899 | 1.25E-11    |
| 0.588252265 | 3.35E-24    | 0.822913941 | 1.35E-61 | -0.263329617 | 2.99E-05    |
| 0.557419754 | 2.11E-21    | 0.76834437  | 5.37E-49 | -0.173603075 | 0.006446977 |
| 0.509738669 | 1.32E-17    | 0.875252292 | 1.29E-78 | -0.299974491 | 1.74E-06    |
| 0.249075346 | 8.11E-05    | 0.795097526 | 1.08E-54 | -0.013579428 | 0.832517093 |
| 0.615192973 | 6.65E-27    | 0.762267554 | 8.28E-48 | -0.180348891 | 0.004629744 |
| 0.379558573 | 8.15E-10    | 0.786376672 | 9.53E-53 | -0.345857581 | 2.72E-08    |
| 0.372232447 | 1.81E-09    | 0.870562196 | 8.48E-77 | -0.151815592 | 0.017409799 |
| 0.232285977 | 0.000244888 | 0.710635352 | 5.62E-39 | -0.137790973 | 0.031080962 |
| 0.428597234 | 2.29E-12    | 0.686519419 | 1.73E-35 | -0.124296244 | 0.05199971  |

|              |             |              |             |              |             |
|--------------|-------------|--------------|-------------|--------------|-------------|
| 0.297437112  | 2.14E-06    | 0.663786011  | 1.70E-32    | -0.193469692 | 0.002353386 |
| 0.456285829  | 5.31E-14    | 0.721663218  | 1.08E-40    | -0.409037014 | 2.67E-11    |
| 0.475663714  | 3.09E-15    | 0.860821623  | 3.06E-73    | -0.192437621 | 0.002485958 |
| 0.495011764  | 1.50E-16    | 0.602815929  | 1.25E-25    | -0.036018474 | 0.574744907 |
| 0.105249731  | 0.100266737 | 0.654138728  | 2.65E-31    | -0.254835531 | 5.45E-05    |
| 0.148603952  | 0.019962087 | 0.744785051  | 1.40E-44    | -0.036607197 | 0.568505345 |
| 0.405074356  | 4.32E-11    | 0.746041134  | 8.37E-45    | -0.166752804 | 0.008920628 |
| 0.305381843  | 1.10E-06    | 0.678059697  | 2.42E-34    | -0.173563769 | 0.006459214 |
| 0.477000191  | 2.52E-15    | 0.843751885  | 1.30E-67    | -0.311041724 | 6.78E-07    |
| 0.478827786  | 1.91E-15    | 0.850675482  | 8.24E-70    | -0.158666689 | 0.012897119 |
| 0.349981923  | 1.81E-08    | 0.607078148  | 4.61E-26    | -0.172518063 | 0.006792485 |
| 0.327014744  | 1.63E-07    | 0.613607458  | 9.76E-27    | -0.184130606 | 0.003826399 |
| 0.234831555  | 0.000208165 | 0.730680048  | 3.67E-42    | -0.025683569 | 0.689140658 |
| 0.607302977  | 4.38E-26    | 0.788941159  | 2.61E-53    | -0.214957923 | 0.000706362 |
| 0.616576765  | 4.76E-27    | 0.80174596   | 3.04E-56    | -0.455871681 | 5.63E-14    |
| 0.404733032  | 4.50E-11    | 0.699084189  | 2.91E-37    | -0.27210469  | 1.57E-05    |
| 0.349433268  | 1.91E-08    | 0.627709411  | 3.00E-28    | -0.110195108 | 0.08520527  |
| 0.63305582   | 7.64E-29    | 0.819811219  | 9.08E-61    | -0.257798634 | 4.43E-05    |
| 0.383224824  | 5.42E-10    | 0.774265989  | 3.44E-50    | -0.132408773 | 0.038353792 |
| 0.457591211  | 4.41E-14    | 0.585294213  | 6.41E-24    | -0.274081357 | 1.35E-05    |
| 0.130835208  | 0.040734165 | 0.107044326  | 0.094574273 | -0.28843368  | 4.44E-06    |
| 0.269850834  | 1.85E-05    | 0.208166571  | 0.001046793 | -0.188328725 | 0.003083779 |
| 0.310219374  | 7.28E-07    | 0.18388246   | 0.003874974 | -0.436090954 | 8.54E-13    |
| 0.149138175  | 0.019516271 | 0.115604731  | 0.070870367 | -0.050175975 | 0.434300151 |
| 0.3143497    | 5.08E-07    | 0.296986092  | 2.22E-06    | -0.074298321 | 0.246616275 |
| 0.333846531  | 8.64E-08    | 0.099928309  | 0.118751931 | -0.169644313 | 0.00778882  |
| 0.174382291  | 0.00620863  | 0.22630726   | 0.00035618  | -0.19560628  | 0.002099162 |
| 0.307628005  | 9.10E-07    | 0.168816005  | 0.008099194 | -0.231890795 | 0.000251103 |
| -0.257780452 | 4.44E-05    | -0.051115652 | 0.425732365 | 0.250545928  | 7.34E-05    |
| 0.207947664  | 0.001059937 | 0.108989229  | 0.088698854 | -0.163626788 | 0.010306299 |
| 0.329874177  | 1.25E-07    | 0.347644236  | 2.28E-08    | -0.208080591 | 0.001051938 |
| 0.35747105   | 8.51E-09    | 0.174453325  | 0.006187299 | -0.396795265 | 1.15E-10    |
| 0.188935523  | 0.002987989 | 0.14317651   | 0.025015389 | -0.022881504 | 0.721565557 |
| 0.344457381  | 3.12E-08    | 0.1808106    | 0.004524132 | -0.167982194 | 0.008422695 |
| 0.360058983  | 6.52E-09    | 0.200902881  | 0.001573176 | -0.315914244 | 4.43E-07    |
| 0.448057703  | 1.68E-13    | 0.384802909  | 4.55E-10    | -0.069958177 | 0.275380428 |
| 0.403039843  | 5.51E-11    | 0.31656568   | 4.18E-07    | -0.350234078 | 1.77E-08    |
| 0.268870047  | 1.99E-05    | 0.231990703  | 0.000249518 | -0.198249064 | 0.001819424 |
| 0.029002615  | 0.651459043 | -0.013420264 | 0.834451748 | 0.168845364  | 0.008088007 |
| 0.221366571  | 0.0004819   | 0.128480034  | 0.044528624 | -0.191367304 | 0.002630583 |

|              |             |              |             |              |             |
|--------------|-------------|--------------|-------------|--------------|-------------|
| 0.04507419   | 0.482509797 | -0.016453724 | 0.797764146 | -0.250553607 | 7.33E-05    |
| 0.167602975  | 0.008573586 | 0.029333268  | 0.647751159 | -0.155001616 | 0.015163672 |
| 0.418900249  | 7.89E-12    | 0.409635819  | 2.49E-11    | -0.283684362 | 6.46E-06    |
| 0.270668156  | 1.74E-05    | 0.237039686  | 0.000180542 | -0.181127406 | 0.004452925 |
| 0.267357345  | 2.23E-05    | 0.18224354   | 0.004210027 | -0.166423714 | 0.009058276 |
| 0.262372058  | 3.20E-05    | 0.234403859  | 0.000213952 | -0.014584022 | 0.820329876 |
| -0.01800735  | 0.779139262 | 0.022278903  | 0.728606572 | 0.045637577  | 0.477047994 |
| 0.317761714  | 3.76E-07    | 0.223433833  | 0.000424983 | -0.196216771 | 0.002031267 |
| 0.182203635  | 0.004218501 | 0.1576352    | 0.013502756 | -0.061113993 | 0.34080089  |
| 0.427216037  | 2.73E-12    | 0.2842192    | 6.20E-06    | -0.30595411  | 1.05E-06    |
| 0.264194676  | 2.80E-05    | 0.301075303  | 1.58E-06    | 0.086510253  | 0.177110176 |
| 0.452484072  | 9.08E-14    | 0.338025419  | 5.82E-08    | -0.065686105 | 0.305836001 |
| 0.249422357  | 7.92E-05    | 0.263080335  | 3.04E-05    | -0.209675546 | 0.000960193 |
| -0.160074545 | 0.012109099 | -0.024517575 | 0.702568486 | 0.224168299  | 0.00040631  |
| 0.070319864  | 0.272899888 | 0.080750613  | 0.207834994 | -0.001843433 | 0.977098475 |
| 0.43691636   | 7.65E-13    | 0.227664416  | 0.00032742  | -0.160077142 | 0.012107685 |
| 0.091780632  | 0.152065985 | 0.088938431  | 0.165216571 | -0.151792624 | 0.017426991 |
| 0.242233264  | 0.000128484 | 0.169383293  | 0.007885463 | -0.150754864 | 0.018219377 |
| -0.335998193 | 7.05E-08    | -0.284896625 | 5.88E-06    | -0.037961062 | 0.554279833 |
| 0.331012017  | 1.13E-07    | 0.249960585  | 7.64E-05    | -0.258816992 | 4.12E-05    |
| 0.433165577  | 1.26E-12    | 0.171108501  | 0.007265997 | -0.30470377  | 1.17E-06    |
| 0.230483889  | 0.000274443 | 0.197956889  | 0.001848583 | -0.019004076 | 0.767255789 |
| 0.339535363  | 5.03E-08    | 0.272024682  | 1.58E-05    | -0.035286865 | 0.582543407 |
| 0.423949588  | 4.16E-12    | 0.21658336   | 0.000641735 | 0.004463571  | 0.944584476 |
| 0.173885554  | 0.006359643 | 0.088297894  | 0.168294392 | -0.058651598 | 0.360645913 |
| -0.276293284 | 1.14E-05    | -0.144015113 | 0.024169133 | 0.265421422  | 2.57E-05    |
| 0.27937528   | 9.03E-06    | 0.142730551  | 0.025475714 | -0.166139935 | 0.009178481 |
| 0.230277254  | 0.000278037 | 0.172899508  | 0.006669178 | -0.119319401 | 0.062215046 |
| 0.271331054  | 1.66E-05    | 0.143935929  | 0.024247971 | -0.229764865 | 0.000287137 |
| 0.196221804  | 0.002030715 | 0.10388562   | 0.10477266  | -0.05230866  | 0.414997284 |
| -0.208593942 | 0.001021565 | -0.093734302 | 0.143496565 | 0.294317207  | 2.77E-06    |
| 0.347737609  | 2.26E-08    | 0.284143498  | 6.23E-06    | -0.162767001 | 0.010719371 |
| -0.335039546 | 7.72E-08    | -0.272734913 | 1.49E-05    | -0.104246808 | 0.103564318 |
| -0.317650024 | 3.80E-07    | -0.205063882 | 0.001247843 | 0.364568121  | 4.08E-09    |
| -0.1600873   | 0.012102158 | -0.270486162 | 1.77E-05    | -0.201427315 | 0.001528281 |
| 0.233445765  | 0.000227465 | 0.166122286  | 0.009186003 | -0.162323919 | 0.010937903 |
| -0.377402948 | 1.03E-09    | -0.276513448 | 1.12E-05    | 0.16876706   | 0.008117873 |
| 0.300586481  | 1.65E-06    | 0.451887297  | 9.88E-14    | 0.017386529  | 0.786567205 |
| 0.263357989  | 2.98E-05    | 0.244359726  | 0.000111539 | -0.112616747 | 0.078523674 |
| 0.426374584  | 3.05E-12    | 0.316103645  | 4.36E-07    | -0.221313879 | 0.000483439 |

|              |             |              |             |              |             |
|--------------|-------------|--------------|-------------|--------------|-------------|
| 0.438670558  | 6.05E-13    | 0.283798331  | 6.41E-06    | -0.224510801 | 0.000397865 |
| 0.124602995  | 0.051418635 | 0.217536485  | 0.000606427 | -0.094694167 | 0.139423537 |
| -0.038888569 | 0.544635166 | -0.091757383 | 0.152170244 | 0.098209922  | 0.125257287 |
| 0.293461531  | 2.97E-06    | 0.187301812  | 0.003252246 | -0.182373191 | 0.004182601 |
| 0.412829085  | 1.68E-11    | 0.262842348  | 3.09E-05    | -0.095283984 | 0.136964981 |
| -0.031398491 | 0.624791176 | 0.002783196  | 0.965429551 | 0.255562168  | 5.18E-05    |
| 0.296876986  | 2.24E-06    | -0.006942772 | 0.913902784 | -0.337451913 | 6.14E-08    |
| -0.237568305 | 0.000174458 | -0.213934818 | 0.000750068 | -0.007583483 | 0.905992427 |
| 0.315720202  | 4.51E-07    | 0.16884649   | 0.008087578 | 0.024177908  | 0.706497803 |
| -0.136291453 | 0.032978188 | -0.074402818 | 0.245950536 | 0.09721979   | 0.129129091 |
| -0.223587975 | 0.000420999 | -0.155821502 | 0.014628398 | 0.411793489  | 1.91E-11    |
| -0.198825015 | 0.00176317  | -0.283654543 | 6.48E-06    | 0.333209254  | 9.18E-08    |
| -0.21223728  | 0.000828127 | -0.122137488 | 0.056245218 | 0.556806656  | 2.38E-21    |
| -0.285245204 | 5.72E-06    | -0.30237202  | 1.42E-06    | 0.376122336  | 1.19E-09    |
| -0.194641531 | 0.002210682 | -0.229576854 | 0.000290546 | 0.421000273  | 6.06E-12    |
| -0.210137216 | 0.000935045 | -0.237755243 | 0.000172352 | 0.347594174  | 2.30E-08    |
| -0.244754518 | 0.000108633 | -0.259201178 | 4.01E-05    | 0.403257446  | 5.37E-11    |
| -0.101334478 | 0.11362697  | -0.040210084 | 0.531038145 | 0.335557771  | 7.35E-08    |
| -0.101768952 | 0.112078983 | -0.012527862 | 0.845317097 | 0.380299034  | 7.51E-10    |
| -0.379729075 | 8.00E-10    | -0.373449497 | 1.59E-09    | 0.513505905  | 6.94E-18    |
| -0.30499102  | 1.14E-06    | -0.211707646 | 0.000853974 | 0.463576235  | 1.86E-14    |
| -0.250353345 | 7.44E-05    | -0.421897837 | 5.40E-12    | 0.265284272  | 2.59E-05    |
| -0.079793898 | 0.213289789 | -0.142582745 | 0.02562988  | 0.378879928  | 8.78E-10    |
| -0.163124502 | 0.010545871 | -0.142535879 | 0.02567893  | 0.350915776  | 1.65E-08    |
| -0.094717034 | 0.139327597 | -0.096782817 | 0.130866938 | -0.187068621 | 0.003291644 |
| -0.202793658 | 0.001416766 | -0.275272138 | 1.23E-05    | 0.32970473   | 1.27E-07    |
| -0.111281372 | 0.082153699 | -0.16291684  | 0.010646348 | 0.308620503  | 8.36E-07    |
| -0.23395307  | 0.000220214 | -0.057789137 | 0.36776373  | 0.412651829  | 1.72E-11    |
| -0.221198668 | 0.00048682  | -0.210629477 | 0.000908901 | 0.286116664  | 5.34E-06    |
| -0.17825874  | 0.005136138 | -0.088055943 | 0.169468048 | 0.25705532   | 4.67E-05    |
| -0.335694883 | 7.26E-08    | -0.228211732 | 0.000316446 | 0.283067064  | 6.78E-06    |
| -0.191664006 | 0.002589744 | -0.15289067  | 0.016621435 | 0.391299515  | 2.18E-10    |
| 0.384053105  | 4.94E-10    | 0.218404266  | 0.000575852 | -0.020673508 | 0.747474567 |
| -0.079508196 | 0.214938483 | -0.133391687 | 0.036927381 | 0.365118125  | 3.85E-09    |
| -0.088772457 | 0.166010016 | -0.072165796 | 0.260476982 | 0.496361776  | 1.21E-16    |
| -0.269357645 | 1.92E-05    | -0.106905826 | 0.095004224 | 0.486928107  | 5.44E-16    |
| 0.097119332  | 0.129527029 | 0.044323775  | 0.48983689  | 0.248048262  | 8.70E-05    |
| -0.123928983 | 0.052702576 | -0.119309262 | 0.062237428 | 0.292373925  | 3.24E-06    |
| -0.151190062 | 0.017883341 | -0.084677267 | 0.186499894 | 0.431614283  | 1.54E-12    |
| -0.374634833 | 1.40E-09    | -0.370995145 | 2.07E-09    | 0.487217653  | 5.20E-16    |

|              |             |              |             |              |             |
|--------------|-------------|--------------|-------------|--------------|-------------|
| -0.057974649 | 0.366225422 | -0.106583543 | 0.096010719 | 0.341805907  | 4.04E-08    |
| -0.251559948 | 6.84E-05    | -0.250134049 | 7.55E-05    | 0.280778224  | 8.10E-06    |
| -0.092277413 | 0.149851092 | -0.137323233 | 0.031662507 | 0.288648059  | 4.37E-06    |
| -0.180820017 | 0.004522    | -0.254250114 | 5.68E-05    | 0.316614604  | 4.16E-07    |
| 0.284709779  | 5.96E-06    | 0.122273146  | 0.055970233 | 0.136699789  | 0.032452037 |
| -0.274171156 | 1.34E-05    | -0.281912386 | 7.42E-06    | 0.410396738  | 2.27E-11    |
| -0.343695241 | 3.37E-08    | -0.257332669 | 4.58E-05    | 0.452474839  | 9.09E-14    |
| -0.109719594 | 0.086569456 | -0.036434212 | 0.570335377 | 0.454632548  | 6.71E-14    |
| -0.218416909 | 0.000575417 | -0.283970929 | 6.32E-06    | 0.276843979  | 1.10E-05    |
| -0.105690227 | 0.098844946 | -0.12232039  | 0.05587473  | 0.272732644  | 1.49E-05    |
| -0.186727306 | 0.003350089 | -0.248437469 | 8.47E-05    | 0.220673886  | 0.0005025   |
| -0.257373478 | 4.57E-05    | -0.305353097 | 1.11E-06    | 0.429402689  | 2.06E-12    |
| -0.158761828 | 0.01284248  | -0.094790245 | 0.139020768 | 0.358742077  | 7.47E-09    |
| -0.141217605 | 0.027092069 | -0.089709517 | 0.161567536 | 0.182465261  | 0.004163222 |
| -0.197961878 | 0.001848082 | -0.316389073 | 4.25E-07    | 0.301888955  | 1.48E-06    |
| 0.103675587  | 0.105480416 | 0.045587307  | 0.477533971 | 0.233312004  | 0.000229414 |
| -0.10864629  | 0.089713071 | -0.12386163  | 0.05283233  | 0.304836321  | 1.15E-06    |
| -0.054220747 | 0.398127335 | -0.087589369 | 0.171748502 | 0.371279152  | 2.00E-09    |
| -0.20408466  | 0.0013183   | -0.289146281 | 4.20E-06    | 0.317269824  | 3.93E-07    |
| -0.221386284 | 0.000481326 | -0.145414107 | 0.02281224  | 0.382149955  | 6.11E-10    |
| -0.158503512 | 0.012991308 | -0.170131016 | 0.007611429 | 0.26641144   | 2.39E-05    |
| -0.202193954 | 0.00146476  | -0.288786255 | 4.32E-06    | 0.133431444  | 0.036870643 |
| 0.028421393  | 0.65799754  | 0.086750896  | 0.175903918 | 0.39722658   | 1.09E-10    |
| -0.118055151 | 0.065057637 | -0.278705371 | 9.50E-06    | 0.210178469  | 0.000932828 |
| -0.256979625 | 4.69E-05    | -0.349366509 | 1.93E-08    | 0.361604385  | 5.56E-09    |
| -0.249750638 | 7.75E-05    | -0.217232811 | 0.000617476 | 0.542941867  | 3.47E-20    |
| -0.045416397 | 0.479188221 | -0.059145316 | 0.356610228 | 0.276239431  | 1.15E-05    |
| 0.077574251  | 0.226338985 | 0.072635654  | 0.257377982 | -0.127472926 | 0.046239384 |
| -0.075452224 | 0.239334282 | -0.111635738 | 0.081177473 | 0.042242878  | 0.510462294 |
| -0.176701561 | 0.00554517  | -0.153677877 | 0.016064101 | 0.542653269  | 3.67E-20    |
| -0.460238898 | 3.02E-14    | -0.40390802  | 4.97E-11    | 0.632540952  | 8.73E-29    |
| -0.049765099 | 0.438077318 | -0.17046359  | 0.007492294 | 0.309841302  | 7.53E-07    |
| -0.120555301 | 0.059535702 | -0.042279388 | 0.510096565 | 0.362880012  | 4.87E-09    |
| 0.076558183  | 0.232497573 | 0.003177839  | 0.960531362 | 0.383105691  | 5.50E-10    |
| -0.14113035  | 0.027187911 | -0.171598743 | 0.007098073 | 0.379950135  | 7.80E-10    |
| -0.105656765 | 0.098952386 | -0.09656968  | 0.131721101 | -0.188004523 | 0.003136091 |
| -0.423552339 | 4.38E-12    | -0.485181032 | 7.15E-16    | 0.257232115  | 4.61E-05    |
| -0.482669894 | 1.06E-15    | -0.464262346 | 1.68E-14    | 0.11384088   | 0.075311062 |
| -0.323839605 | 2.18E-07    | -0.339537043 | 5.03E-08    | 0.03182801   | 0.620060204 |
| -0.314165834 | 5.17E-07    | -0.279862518 | 8.69E-06    | 0.260827803  | 3.57E-05    |

|              |             |              |             |              |             |
|--------------|-------------|--------------|-------------|--------------|-------------|
| -0.543747501 | 2.98E-20    | -0.480804545 | 1.41E-15    | 0.236005622  | 0.000193021 |
| -0.49110261  | 2.81E-16    | -0.49361011  | 1.88E-16    | 0.446990871  | 1.95E-13    |
| 0.520349489  | 2.12E-18    | 0.37154643   | 1.95E-09    | -0.350156449 | 1.78E-08    |
| -0.317428747 | 3.88E-07    | -0.447163875 | 1.90E-13    | 0.269656913  | 1.88E-05    |
| -0.515015713 | 5.35E-18    | -0.471083319 | 6.15E-15    | 0.312342962  | 6.06E-07    |
| 0.400633582  | 7.33E-11    | 0.321808597  | 2.62E-07    | -0.167631299 | 0.008562233 |
| -0.300687106 | 1.64E-06    | -0.309432262 | 7.80E-07    | 0.343540564  | 3.42E-08    |
| -0.448270111 | 1.63E-13    | -0.382140861 | 6.12E-10    | 0.293877046  | 2.87E-06    |
| -0.599061419 | 2.96E-25    | -0.539429507 | 6.72E-20    | 0.360300707  | 6.36E-09    |
| -0.323152423 | 2.32E-07    | -0.473407975 | 4.34E-15    | 0.093267987  | 0.145507743 |
| -0.328181348 | 1.47E-07    | -0.305163735 | 1.12E-06    | 0.151984836  | 0.017283569 |
| -0.260260433 | 3.72E-05    | -0.318602346 | 3.49E-07    | 0.503971182  | 3.47E-17    |
| -0.34803028  | 2.20E-08    | -0.370880001 | 2.09E-09    | 0.447678709  | 1.77E-13    |
| 0.41268004   | 1.71E-11    | 0.412072334  | 1.84E-11    | -0.304115724 | 1.23E-06    |
| -0.452383869 | 9.21E-14    | -0.488915112 | 3.98E-16    | 0.27970022   | 8.80E-06    |
| -0.622047301 | 1.24E-27    | -0.587746934 | 3.75E-24    | 0.633616308  | 6.61E-29    |
| 0.309437876  | 7.79E-07    | 0.368664722  | 2.65E-09    | -0.3058414   | 1.06E-06    |
| 0.276142307  | 1.16E-05    | 0.090330353  | 0.158673748 | -0.426778216 | 2.89E-12    |
| -0.387926101 | 3.20E-10    | -0.326682098 | 1.68E-07    | 0.39976698   | 8.12E-11    |
| 0.284733613  | 5.95E-06    | 0.326280316  | 1.74E-07    | -0.19104827  | 0.002675147 |
| 0.649403863  | 9.84E-31    | 0.48105515   | 1.36E-15    | -0.150178057 | 0.018673214 |
| 0.561212115  | 9.89E-22    | 0.260414085  | 3.68E-05    | -0.486209466 | 6.09E-16    |
| -0.470762497 | 6.45E-15    | -0.459704695 | 3.26E-14    | 0.152319797  | 0.017036093 |
| -0.113815687 | 0.075376087 | -0.315443547 | 4.62E-07    | 0.135440453  | 0.034098078 |
| -0.483281437 | 9.61E-16    | -0.461673066 | 2.45E-14    | 0.35529599   | 1.06E-08    |
| 0.377062092  | 1.07E-09    | 0.208827035  | 0.001008041 | -0.12305614  | 0.054404741 |
| -0.567099358 | 3.00E-22    | -0.563870664 | 5.79E-22    | 0.32394288   | 2.16E-07    |
| -0.437586839 | 6.99E-13    | -0.294028813 | 2.83E-06    | 0.210796523  | 0.000900183 |
| 0.565806812  | 3.90E-22    | 0.419439879  | 7.37E-12    | -0.030188164 | 0.638204841 |
| -0.302827352 | 1.37E-06    | -0.224666991 | 0.000394069 | 0.503760197  | 3.59E-17    |
| -0.532806127 | 2.28E-19    | -0.565659724 | 4.02E-22    | 0.309023399  | 8.08E-07    |
| -0.389416108 | 2.70E-10    | -0.376213154 | 1.18E-09    | 0.414316988  | 1.40E-11    |
| 0.155540051  | 0.014810251 | 0.204746888  | 0.001270264 | 0.036807148  | 0.566393515 |
| -0.412854499 | 1.68E-11    | -0.526043378 | 7.74E-19    | 0.362361539  | 5.14E-09    |
| 0.616903794  | 4.39E-27    | 0.430632783  | 1.75E-12    | -0.034533187 | 0.590628098 |
| -0.079944432 | 0.212424766 | -0.401985896 | 6.24E-11    | 0.22364883   | 0.000419436 |
| -0.252471344 | 6.43E-05    | -0.33876279  | 5.42E-08    | 0.059481594  | 0.353877729 |
| -0.656367145 | 1.42E-31    | -0.631363447 | 1.18E-28    | 0.245437759  | 0.000103771 |
| -0.1663925   | 0.009071428 | -0.304224324 | 1.22E-06    | 0.101998521  | 0.111267749 |
| -0.165165472 | 0.009602093 | -0.275774703 | 1.19E-05    | 0.30290848   | 1.36E-06    |

|              |             |              |             |              |             |
|--------------|-------------|--------------|-------------|--------------|-------------|
| 0.374342984  | 1.44E-09    | 0.265714804  | 2.51E-05    | -0.439711269 | 5.26E-13    |
| 0.35802028   | 8.04E-09    | 0.316250242  | 4.30E-07    | -0.269515824 | 1.90E-05    |
| 0.371577422  | 1.94E-09    | 0.315562594  | 4.57E-07    | -0.116364711 | 0.069023967 |
| -0.353497469 | 1.27E-08    | -0.421661708 | 5.57E-12    | 0.298090071  | 2.03E-06    |
| 0.07915419   | 0.216993971 | 0.11984736   | 0.061058579 | -0.353449917 | 1.28E-08    |
| 0.323455296  | 2.26E-07    | 0.582699252  | 1.13E-23    | -0.239404878 | 0.000154776 |
| 0.391774336  | 2.06E-10    | 0.63838371   | 1.90E-29    | -0.126540165 | 0.047872578 |
| -0.49878424  | 8.14E-17    | -0.510982585 | 1.07E-17    | 0.315066633  | 4.77E-07    |
| 0.343566446  | 3.41E-08    | 0.234904299  | 0.000207196 | 0.075056115  | 0.241816843 |
| 0.452239852  | 9.40E-14    | 0.379996719  | 7.76E-10    | -0.329870894 | 1.25E-07    |
| -0.503213916 | 3.93E-17    | -0.420549186 | 6.41E-12    | 0.396359718  | 1.21E-10    |
| -0.469556583 | 7.72E-15    | -0.573611079 | 7.78E-23    | 0.253309166  | 6.07E-05    |
| -0.445855842 | 2.28E-13    | -0.302870919 | 1.36E-06    | 0.599254359  | 2.83E-25    |
| 0.461927682  | 2.36E-14    | 0.467476983  | 1.05E-14    | -0.248231884 | 8.59E-05    |
| 0.464451763  | 1.64E-14    | 0.40532905   | 4.19E-11    | -0.204904862 | 0.001259045 |
| 0.373373718  | 1.60E-09    | 0.379372983  | 8.32E-10    | -0.244653456 | 0.00010937  |
| 0.487425375  | 5.03E-16    | 0.328490534  | 1.42E-07    | -0.221813514 | 0.000469027 |
| -0.505576001 | 2.65E-17    | -0.546711186 | 1.70E-20    | 0.417277271  | 9.67E-12    |
| 0.199028566  | 0.001743672 | 0.347579515  | 2.30E-08    | -0.129181476 | 0.043368713 |
| 0.188408865  | 0.003070971 | 0.279372712  | 9.03E-06    | -0.274550144 | 1.30E-05    |
| 0.320486195  | 2.95E-07    | 0.311680171  | 6.42E-07    | -0.477458337 | 2.35E-15    |
| -0.31473965  | 4.91E-07    | -0.329491217 | 1.30E-07    | 0.434792779  | 1.01E-12    |
| -0.580264209 | 1.90E-23    | -0.510426811 | 1.17E-17    | 0.346504681  | 2.56E-08    |
| 0.359838205  | 6.67E-09    | 0.428562839  | 2.30E-12    | -0.253291427 | 6.07E-05    |
| -0.443724756 | 3.05E-13    | -0.438135686 | 6.50E-13    | 0.366513244  | 3.33E-09    |
| 0.39761077   | 1.05E-10    | 0.376549767  | 1.13E-09    | -0.193740866 | 0.002319637 |
| -0.204353739 | 0.001298584 | -0.346207089 | 2.63E-08    | 0.143180612  | 0.025011189 |
| -0.445649086 | 2.35E-13    | -0.578323133 | 2.88E-23    | 0.376469056  | 1.14E-09    |
| -0.393068938 | 1.77E-10    | -0.421767985 | 5.49E-12    | 0.424096369  | 4.08E-12    |
| -0.515587287 | 4.85E-18    | -0.445763335 | 2.31E-13    | 0.207250419  | 0.001102818 |
| -0.389120267 | 2.79E-10    | -0.325693433 | 1.84E-07    | 0.391503254  | 2.13E-10    |
| -0.572702265 | 9.41E-23    | -0.506531364 | 2.26E-17    | 0.258857953  | 4.11E-05    |
| 0.544904095  | 2.40E-20    | 0.523627526  | 1.19E-18    | 0.007440313  | 0.907759262 |
| 0.157274645  | 0.01372027  | 0.398714494  | 9.19E-11    | -0.343296778 | 3.50E-08    |
| -0.132226942 | 0.038622705 | -0.220000375 | 0.00052331  | 0.203340527  | 0.001374261 |
| 0.65828645   | 8.25E-32    | 0.485077284  | 7.27E-16    | -0.436937041 | 7.63E-13    |
| -0.61169989  | 1.54E-26    | -0.476233172 | 2.84E-15    | 0.416582238  | 1.06E-11    |
| -0.197108256 | 0.001935714 | -0.36156194  | 5.58E-09    | 0.530907567  | 3.22E-19    |
| -0.354723457 | 1.13E-08    | -0.49370057  | 1.86E-16    | -0.003956972 | 0.950865528 |
| 0.196477597  | 0.002002874 | 0.392661003  | 1.86E-10    | -0.046799459 | 0.465891041 |

|              |          |              |             |              |             |
|--------------|----------|--------------|-------------|--------------|-------------|
| -0.420341091 | 6.58E-12 | -0.408686505 | 2.79E-11    | 0.509976323  | 1.27E-17    |
| -0.645772633 | 2.65E-30 | -0.557435481 | 2.10E-21    | 0.346978071  | 2.44E-08    |
| 0.385192165  | 4.35E-10 | 0.309437153  | 7.79E-07    | -0.452525682 | 9.03E-14    |
| 0.342383025  | 3.82E-08 | 0.224316325  | 0.00040264  | -0.496761695 | 1.13E-16    |
| -0.665395192 | 1.07E-32 | -0.470744293 | 6.47E-15    | 0.542097932  | 4.07E-20    |
| -0.592107656 | 1.43E-24 | -0.421837876 | 5.45E-12    | 0.485356604  | 6.96E-16    |
| -0.573290494 | 8.32E-23 | -0.571679756 | 1.16E-22    | 0.534655416  | 1.63E-19    |
| -0.4199511   | 6.91E-12 | -0.465443768 | 1.42E-14    | 0.122679773  | 0.055152646 |
| -0.595596621 | 6.51E-25 | -0.596865834 | 4.89E-25    | 0.385309926  | 4.29E-10    |
| -0.694457763 | 1.34E-36 | -0.648385353 | 1.30E-30    | 0.440375643  | 4.81E-13    |
| -0.388247974 | 3.08E-10 | -0.227000456 | 0.000341209 | 0.272467116  | 1.52E-05    |
| -0.330602993 | 1.17E-07 | -0.394993115 | 1.42E-10    | 0.368943892  | 2.57E-09    |
| 0.685024116  | 2.78E-35 | 0.509028079  | 1.49E-17    | -0.484621098 | 7.81E-16    |
| -0.561530856 | 9.28E-22 | -0.460024657 | 3.11E-14    | 0.515265362  | 5.13E-18    |
| -0.491390766 | 2.68E-16 | -0.485367496 | 6.95E-16    | 0.404738007  | 4.50E-11    |
| -0.560295957 | 1.19E-21 | -0.559373706 | 1.43E-21    | 0.408577507  | 2.83E-11    |
| -0.521808637 | 1.64E-18 | -0.405537387 | 4.08E-11    | 0.449075314  | 1.46E-13    |
| -0.684056557 | 3.77E-35 | -0.621002736 | 1.61E-27    | 0.64648485   | 2.18E-30    |
| -0.506639845 | 2.22E-17 | -0.613093521 | 1.10E-26    | 0.334151095  | 8.40E-08    |
| -0.450619815 | 1.18E-13 | -0.372095477 | 1.84E-09    | 0.537979778  | 8.80E-20    |
| -0.451754413 | 1.01E-13 | -0.445269171 | 2.47E-13    | 0.314512889  | 5.01E-07    |
| -0.488242432 | 4.42E-16 | -0.501459485 | 5.25E-17    | 0.287938992  | 4.62E-06    |
| -0.396147971 | 1.24E-10 | -0.441839652 | 3.94E-13    | 0.219774333  | 0.000530471 |
| -0.459482143 | 3.36E-14 | -0.589244131 | 2.69E-24    | 0.279358216  | 9.04E-06    |
| -0.417061074 | 9.94E-12 | -0.416395807 | 1.08E-11    | 0.489591264  | 3.57E-16    |
| 0.256922238  | 4.71E-05 | 0.157279227  | 0.013717486 | -0.202544417 | 0.001436535 |
| 0.580638399  | 1.75E-23 | 0.368040031  | 2.83E-09    | -0.54374465  | 2.98E-20    |
| -0.555099903 | 3.33E-21 | -0.592902361 | 1.19E-24    | 0.280811464  | 8.08E-06    |
| 0.448741283  | 1.53E-13 | 0.442578354  | 3.57E-13    | -0.222245256 | 0.000456895 |
| 0.558999945  | 1.54E-21 | 0.274617942  | 1.30E-05    | -0.293284861 | 3.01E-06    |
| -0.459387725 | 3.41E-14 | -0.426745035 | 2.91E-12    | 0.443914503  | 2.97E-13    |
| 0.481352117  | 1.30E-15 | 0.496122403  | 1.26E-16    | -0.171591205 | 0.007100629 |
| -0.544529209 | 2.57E-20 | -0.479744456 | 1.66E-15    | 0.572131878  | 1.06E-22    |
| 0.625654491  | 5.04E-28 | 0.620567169  | 1.79E-27    | -0.424483166 | 3.89E-12    |
| 0.649271172  | 1.02E-30 | 0.642982105  | 5.61E-30    | -0.424080174 | 4.09E-12    |
| 0.429414838  | 2.06E-12 | 0.555071806  | 3.35E-21    | -0.26685044  | 2.31E-05    |
| 0.543894738  | 2.90E-20 | 0.491028676  | 2.84E-16    | 0.086992007  | 0.174701427 |
| -0.268499946 | 2.05E-05 | -0.362913767 | 4.85E-09    | -0.052155322 | 0.416368104 |
| -0.409576981 | 2.50E-11 | -0.426100502 | 3.16E-12    | 0.166672506  | 0.008954042 |
| 0.530839803  | 3.26E-19 | 0.353418589  | 1.28E-08    | -0.393209298 | 1.75E-10    |



|              |             |              |             |              |             |
|--------------|-------------|--------------|-------------|--------------|-------------|
| -0.590328867 | 2.12E-24    | -0.509945102 | 1.27E-17    | 0.108918942  | 0.088905969 |
| -0.53179067  | 2.75E-19    | -0.538061034 | 8.67E-20    | 0.379005668  | 8.66E-10    |
| -0.647317714 | 1.74E-30    | -0.575852357 | 4.86E-23    | 0.448024869  | 1.69E-13    |
| -0.651033403 | 6.28E-31    | -0.544115554 | 2.78E-20    | 0.451285515  | 1.07E-13    |
| 0.637943642  | 2.14E-29    | 0.608488907  | 3.31E-26    | -0.392972872 | 1.79E-10    |
| -0.472314858 | 5.12E-15    | -0.517829102 | 3.29E-18    | 0.209731942  | 0.000957088 |
| -0.448218346 | 1.65E-13    | -0.580373861 | 1.86E-23    | 0.127756909  | 0.045751508 |
| -0.591387914 | 1.67E-24    | -0.56147137  | 9.39E-22    | 0.286823266  | 5.05E-06    |
| -0.368988478 | 2.56E-09    | -0.504044507 | 3.42E-17    | 0.236572561  | 0.000186083 |
| -0.329451935 | 1.30E-07    | -0.394365896 | 1.53E-10    | 0.270760605  | 1.73E-05    |
| 0.359243891  | 7.09E-09    | 0.479886856  | 1.62E-15    | -0.250040903 | 7.60E-05    |
| 0.150851548  | 0.018144252 | 0.191880395  | 0.002560324 | -0.286949881 | 5.00E-06    |
| -0.552262024 | 5.81E-21    | -0.55153935  | 6.69E-21    | 0.291963145  | 3.35E-06    |
| -0.507180769 | 2.03E-17    | -0.421818019 | 5.46E-12    | 0.561348324  | 9.63E-22    |
| -0.33574999  | 7.22E-08    | -0.437388146 | 7.18E-13    | 0.405530497  | 4.09E-11    |
| 0.514172329  | 6.19E-18    | 0.472411802  | 5.04E-15    | -0.389094755 | 2.80E-10    |
| -0.626240885 | 4.35E-28    | -0.615898063 | 5.61E-27    | 0.356735078  | 9.17E-09    |
| -0.367413386 | 3.03E-09    | -0.348216184 | 2.16E-08    | 0.274017676  | 1.36E-05    |
| -0.691215135 | 3.86E-36    | -0.568825534 | 2.10E-22    | 0.253167669  | 6.13E-05    |
| -0.446135251 | 2.19E-13    | -0.462895932 | 2.05E-14    | 0.191043625  | 0.002675801 |
| -0.322704377 | 2.42E-07    | -0.321871104 | 2.60E-07    | 0.268459194  | 2.05E-05    |
| -0.418236616 | 8.58E-12    | -0.483930532 | 8.69E-16    | 0.05074527   | 0.429097666 |
| -0.492252212 | 2.34E-16    | -0.518807504 | 2.78E-18    | 0.289553871  | 4.06E-06    |
| -0.257804964 | 4.43E-05    | -0.585405015 | 6.26E-24    | 0.167486812  | 0.008620285 |
| 0.508335292  | 1.67E-17    | 0.506221816  | 2.38E-17    | -0.210821029 | 0.00089891  |
| 0.053323423  | 0.405992526 | -0.135494035 | 0.034026624 | -0.12609408  | 0.048670508 |
| 0.339274254  | 5.16E-08    | 0.34644434   | 2.57E-08    | -0.196831656 | 0.001964913 |
| 0.584292778  | 7.97E-24    | 0.347161646  | 2.40E-08    | -0.261422482 | 3.42E-05    |
| -0.485442811 | 6.87E-16    | -0.434200691 | 1.10E-12    | 0.477253306  | 2.43E-15    |
| 0.486666642  | 5.67E-16    | 0.463681104  | 1.83E-14    | -0.224567818 | 0.000396476 |
| 0.552322078  | 5.74E-21    | 0.540428128  | 5.57E-20    | 0.035621668  | 0.578968527 |
| 0.658198456  | 8.46E-32    | 0.418770767  | 8.02E-12    | -0.415405388 | 1.22E-11    |
| -0.414983331 | 1.29E-11    | -0.489630217 | 3.55E-16    | 0.315333967  | 4.66E-07    |
| -0.230795999 | 0.000269097 | -0.156011022 | 0.014507048 | 0.175858746  | 0.005778532 |
| -0.396165439 | 1.24E-10    | -0.347410042 | 2.34E-08    | 0.477503322  | 2.34E-15    |
| 0.233271568  | 0.000230006 | 0.118573114  | 0.063880411 | -0.269746173 | 1.87E-05    |
| -0.638182893 | 2.01E-29    | -0.649996769 | 8.36E-31    | 0.302920228  | 1.36E-06    |
| -0.45903722  | 3.58E-14    | -0.503113228 | 4.00E-17    | 0.235029365  | 0.000205538 |
| 0.427977549  | 2.48E-12    | 0.261681177  | 3.36E-05    | -0.282703142 | 6.98E-06    |
| -0.404755639 | 4.49E-11    | -0.246924548 | 9.39E-05    | 0.218546528  | 0.000570978 |

|              |             |              |             |              |             |
|--------------|-------------|--------------|-------------|--------------|-------------|
| -0.307509203 | 9.20E-07    | -0.321447361 | 2.71E-07    | 0.277727623  | 1.02E-05    |
| -0.575793056 | 4.92E-23    | -0.657178892 | 1.13E-31    | 0.449165866  | 1.44E-13    |
| -0.481720776 | 1.22E-15    | -0.393054748 | 1.78E-10    | 0.068059586  | 0.288651796 |
| 0.487788181  | 4.75E-16    | 0.536468938  | 1.16E-19    | -0.292402189 | 3.23E-06    |
| -0.613565255 | 9.86E-27    | -0.553780346 | 4.32E-21    | 0.44958632   | 1.36E-13    |
| -0.574961361 | 5.86E-23    | -0.505858784 | 2.53E-17    | 0.108824223  | 0.089185693 |
| -0.466392678 | 1.23E-14    | -0.468360543 | 9.22E-15    | 0.060023957  | 0.349498436 |
| 0.457008747  | 4.79E-14    | 0.49476391   | 1.56E-16    | -0.438395003 | 6.28E-13    |
| -0.576251587 | 4.46E-23    | -0.561202913 | 9.91E-22    | 0.450442709  | 1.21E-13    |
| 0.473457471  | 4.31E-15    | 0.293027839  | 3.07E-06    | -0.237250523 | 0.000178092 |
| -0.408460488 | 2.87E-11    | -0.433284506 | 1.24E-12    | 0.140435432  | 0.027961662 |
| -0.560910319 | 1.05E-21    | -0.494349197 | 1.67E-16    | 0.202342519  | 0.001452734 |
| -0.508494038 | 1.63E-17    | -0.40747542  | 3.23E-11    | 0.334458929  | 8.16E-08    |
| -0.458113929 | 4.09E-14    | -0.454627789 | 6.71E-14    | 0.417980619  | 8.86E-12    |
| -0.340939339 | 4.40E-08    | -0.374998629 | 1.34E-09    | 0.288054473  | 4.58E-06    |
| -0.410531594 | 2.23E-11    | -0.288077531 | 4.57E-06    | 0.296238107  | 2.36E-06    |
| 0.619903275  | 2.11E-27    | 0.58558291   | 6.02E-24    | -0.554354258 | 3.86E-21    |
| 0.562208372  | 8.10E-22    | 0.49820768   | 8.95E-17    | -0.231377935 | 0.000259388 |
| -0.361035957 | 5.90E-09    | -0.323005078 | 2.35E-07    | 0.290469443  | 3.78E-06    |
| 0.408047424  | 3.02E-11    | 0.556275626  | 2.64E-21    | 0.038169383  | 0.552106396 |
| 0.450155207  | 1.26E-13    | 0.196707579  | 0.001978141 | -0.17611567  | 0.005706479 |
| 0.461021785  | 2.69E-14    | 0.57633205   | 4.39E-23    | -0.317413527 | 3.88E-07    |
| 0.334821571  | 7.88E-08    | 0.371650828  | 1.93E-09    | -0.507823836 | 1.82E-17    |
| -0.476819717 | 2.59E-15    | -0.580049046 | 1.99E-23    | 0.406408806  | 3.68E-11    |
| 0.687866958  | 1.13E-35    | 0.45298117   | 8.47E-14    | -0.42896623  | 2.18E-12    |
| 0.548383077  | 1.23E-20    | 0.378185403  | 9.48E-10    | -0.517223413 | 3.66E-18    |
| 0.51982061   | 2.33E-18    | 0.427511592  | 2.63E-12    | -0.122581621 | 0.055349083 |
| -0.454055001 | 7.28E-14    | -0.428656015 | 2.27E-12    | 0.625158174  | 5.71E-28    |
| 0.442365174  | 3.67E-13    | 0.406332209  | 3.71E-11    | -0.384784579 | 4.56E-10    |
| 0.360131318  | 6.47E-09    | 0.473145771  | 4.52E-15    | -0.07321647  | 0.253582402 |
| -0.519083937 | 2.64E-18    | -0.485444925 | 6.86E-16    | 0.452458538  | 9.11E-14    |
| -0.337133029 | 6.33E-08    | -0.353181421 | 1.31E-08    | 0.009828102  | 0.878357969 |
| -0.114175488 | 0.074451724 | -0.243468117 | 0.000118371 | 0.014145519  | 0.82564445  |
| 0.665303898  | 1.10E-32    | 0.536146236  | 1.24E-19    | -0.440179434 | 4.94E-13    |
| 0.373059041  | 1.66E-09    | 0.179096893  | 0.004927384 | -0.126754197 | 0.047493626 |
| -0.21957245  | 0.000536943 | -0.304171635 | 1.22E-06    | 0.152764875  | 0.016712042 |
| 0.440108378  | 4.99E-13    | 0.35212651   | 1.46E-08    | -0.445374999 | 2.44E-13    |
| 0.429142452  | 2.13E-12    | 0.423273384  | 4.54E-12    | -0.19743295  | 0.001901944 |
| -0.4307294   | 1.73E-12    | -0.370190161 | 2.25E-09    | 0.230053044  | 0.000281985 |
| 0.56003214   | 1.25E-21    | 0.449680519  | 1.34E-13    | -0.386777106 | 3.64E-10    |

|              |             |              |             |              |             |
|--------------|-------------|--------------|-------------|--------------|-------------|
| 0.352732709  | 1.38E-08    | 0.298305023  | 1.99E-06    | -0.231526364 | 0.000256964 |
| -0.544340805 | 2.67E-20    | -0.578501327 | 2.77E-23    | 0.341702697  | 4.08E-08    |
| -0.399032566 | 8.86E-11    | -0.440738978 | 4.58E-13    | 0.289105511  | 4.21E-06    |
| -0.300290397 | 1.69E-06    | -0.28273084  | 6.96E-06    | 0.167900624  | 0.008454951 |
| -0.351838848 | 1.50E-08    | -0.52492068  | 9.46E-19    | 0.139575689  | 0.028944977 |
| -0.439492183 | 5.42E-13    | -0.479782095 | 1.65E-15    | 0.286589353  | 5.14E-06    |
| -0.333885375 | 8.61E-08    | -0.349550782 | 1.89E-08    | 0.378931851  | 8.73E-10    |
| 0.432971819  | 1.29E-12    | 0.444907844  | 2.60E-13    | -0.147666737 | 0.02076557  |
| -0.453747131 | 7.60E-14    | -0.522713008 | 1.40E-18    | 0.215423485  | 0.000687262 |
| -0.59691921  | 4.83E-25    | -0.503412373 | 3.80E-17    | 0.400986342  | 7.03E-11    |
| 0.516833586  | 3.91E-18    | 0.663069269  | 2.10E-32    | -0.456375095 | 5.24E-14    |
| -0.195926514 | 0.002063293 | -0.316598848 | 4.17E-07    | -0.043464006 | 0.498304318 |
| 0.357541604  | 8.45E-09    | 0.268636524  | 2.03E-05    | -0.169753237 | 0.007748803 |
| -0.112293984 | 0.079388947 | -0.372412991 | 1.77E-09    | 0.190134607  | 0.002806592 |
| 0.157657546  | 0.013489375 | 0.531399829  | 2.95E-19    | -0.429791283 | 1.96E-12    |
| 0.494909967  | 1.53E-16    | 0.39997112   | 7.93E-11    | -0.109913503 | 0.086011055 |
| 0.320998732  | 2.82E-07    | 0.469003205  | 8.38E-15    | -0.367724591 | 2.93E-09    |
| 0.458384539  | 3.94E-14    | 0.47901279   | 1.86E-15    | -0.275150092 | 1.25E-05    |
| 0.425377601  | 3.46E-12    | 0.261165366  | 3.49E-05    | -0.273614533 | 1.40E-05    |
| 0.403017201  | 5.52E-11    | 0.344663163  | 3.06E-08    | -0.300117498 | 1.72E-06    |
| 0.528630644  | 4.87E-19    | 0.464910852  | 1.53E-14    | -0.571140965 | 1.30E-22    |
| -0.276177884 | 1.15E-05    | -0.356225831 | 9.66E-09    | 0.241102086  | 0.000138453 |
| -0.394693359 | 1.47E-10    | -0.309969978 | 7.44E-07    | 0.520992173  | 1.89E-18    |
| 0.183321874  | 0.003986767 | 0.220080702  | 0.000520786 | -0.279515659 | 8.93E-06    |
| 0.743333848  | 2.52E-44    | 0.555143449  | 3.31E-21    | -0.373708159 | 1.54E-09    |
| -0.746086454 | 8.22E-45    | -0.628073069 | 2.74E-28    | 0.433866968  | 1.15E-12    |
| -0.369479965 | 2.43E-09    | -0.474302172 | 3.80E-15    | 0.347133594  | 2.40E-08    |
| -0.317259592 | 3.93E-07    | -0.415273852 | 1.24E-11    | 0.162960246  | 0.010625276 |
| -0.274992668 | 1.26E-05    | -0.371009171 | 2.06E-09    | 0.34447523   | 3.12E-08    |
| -0.381295156 | 6.72E-10    | -0.354522288 | 1.15E-08    | 0.470122511  | 7.10E-15    |
| -0.393590106 | 1.67E-10    | -0.346514995 | 2.55E-08    | 0.238020617  | 0.000169404 |
| 0.516545392  | 4.11E-18    | 0.567507475  | 2.76E-22    | -0.396279089 | 1.22E-10    |
| 0.531539692  | 2.87E-19    | 0.267504159  | 2.20E-05    | -0.457908464 | 4.21E-14    |
| -0.056633887 | 0.377433095 | -0.109422248 | 0.08743137  | 0.06923558   | 0.280381843 |
| 0.280305706  | 8.40E-06    | 0.19316032   | 0.002392434 | -0.160943523 | 0.011644154 |
| 0.145872721  | 0.022381982 | 0.227789721  | 0.000324877 | 0.30310645   | 1.34E-06    |
| -0.447797963 | 1.74E-13    | -0.277921206 | 1.01E-05    | 0.304232295  | 1.22E-06    |
| -0.566054093 | 3.71E-22    | -0.486784968 | 5.56E-16    | 0.499683469  | 7.03E-17    |
| -0.588315229 | 3.31E-24    | -0.509580189 | 1.35E-17    | 0.393826383  | 1.63E-10    |
| -0.40056813  | 7.39E-11    | -0.176476879 | 0.00560654  | 0.321601715  | 2.67E-07    |

|              |             |              |             |              |             |
|--------------|-------------|--------------|-------------|--------------|-------------|
| -0.476700857 | 2.64E-15    | -0.303062394 | 1.34E-06    | 0.287485982  | 4.79E-06    |
| 0.429533451  | 2.02E-12    | 0.508470821  | 1.63E-17    | -0.223296495 | 0.000428561 |
| 0.550663251  | 7.93E-21    | 0.543139443  | 3.35E-20    | -0.225247587 | 0.000380249 |
| 0.506651162  | 2.22E-17    | 0.394253362  | 1.55E-10    | -0.207232542 | 0.001103938 |
| 0.287959624  | 4.61E-06    | 0.526427446  | 7.23E-19    | 0.321128724  | 2.78E-07    |
| -0.544966856 | 2.37E-20    | -0.245222598 | 0.00010528  | 0.595707358  | 6.35E-25    |
| -0.382386995 | 5.96E-10    | -0.494154993 | 1.72E-16    | 0.132531882  | 0.038172623 |
| -0.421447352 | 5.72E-12    | -0.415557299 | 1.20E-11    | 0.084914102  | 0.185266514 |
| -0.629332764 | 1.99E-28    | -0.580008222 | 2.01E-23    | 0.361725188  | 5.49E-09    |
| 0.228559881  | 0.000309644 | 0.24810622   | 8.67E-05    | -0.334784374 | 7.91E-08    |
| -0.486579385 | 5.75E-16    | -0.565090795 | 4.52E-22    | 0.185615444  | 0.003547049 |
| 0.480152223  | 1.56E-15    | 0.409957316  | 2.39E-11    | -0.418060232 | 8.77E-12    |
| -0.505436241 | 2.72E-17    | -0.589139993 | 2.76E-24    | 0.371049375  | 2.05E-09    |
| -0.317555463 | 3.83E-07    | -0.298977991 | 1.89E-06    | 0.449542577  | 1.37E-13    |
| 0.469339759  | 7.97E-15    | 0.323222341  | 2.31E-07    | -0.442501291 | 3.61E-13    |
| 0.192666131  | 0.002456033 | 0.205915187  | 0.001189417 | -0.362051859 | 5.31E-09    |
| -0.374109772 | 1.48E-09    | -0.479688234 | 1.67E-15    | 0.136845804  | 0.032265636 |
| -0.288205429 | 4.52E-06    | -0.353419305 | 1.28E-08    | 0.146408765  | 0.021887986 |
| -0.2278425   | 0.000323811 | -0.285588315 | 5.57E-06    | -0.130164321 | 0.041786232 |
| -0.564430721 | 5.17E-22    | -0.477220333 | 2.44E-15    | 0.228669139  | 0.000307537 |
| -0.444537565 | 2.73E-13    | -0.507970398 | 1.78E-17    | 0.227920147  | 0.000322249 |
| -0.306627259 | 9.92E-07    | -0.298591384 | 1.95E-06    | 0.196764859  | 0.001972024 |
| -0.268019536 | 2.12E-05    | -0.46019791  | 3.03E-14    | 0.286426737  | 5.21E-06    |
| -0.51541708  | 5.00E-18    | -0.521857826 | 1.63E-18    | 0.424901566  | 3.68E-12    |
| -0.487927617 | 4.65E-16    | -0.439861191 | 5.15E-13    | 0.58182915   | 1.36E-23    |
| -0.246438477 | 9.70E-05    | -0.344501285 | 3.11E-08    | 0.248032194  | 8.71E-05    |
| -0.51591246  | 4.59E-18    | -0.49835979  | 8.73E-17    | 0.396635309  | 1.17E-10    |
| 0.279894069  | 8.67E-06    | 0.243920984  | 0.000114853 | -0.142444681 | 0.025774608 |
| 0.235696454  | 0.000196906 | 0.218473611  | 0.000573471 | -0.126442938 | 0.048045555 |
| -0.275795321 | 1.19E-05    | -0.245138578 | 0.000105874 | 0.370789947  | 2.11E-09    |
| 0.208050446  | 0.001053747 | 0.06898987   | 0.282096396 | -0.454125028 | 7.21E-14    |
| -0.372180627 | 1.82E-09    | -0.378165789 | 9.50E-10    | 0.291561728  | 3.46E-06    |
| 0.224694299  | 0.000393409 | 0.055374283  | 0.388151544 | -0.389304382 | 2.73E-10    |
| -0.378280233 | 9.38E-10    | -0.357481508 | 8.50E-09    | 0.397066738  | 1.12E-10    |
| -0.462544997 | 2.16E-14    | -0.359020532 | 7.26E-09    | 0.2472294    | 9.20E-05    |
| -0.268907413 | 1.99E-05    | -0.055916386 | 0.383516179 | 0.295730066  | 2.46E-06    |
| 0.351767449  | 1.52E-08    | 0.288772895  | 4.32E-06    | -0.220514757 | 0.000507346 |
| 0.520391997  | 2.10E-18    | 0.458469552  | 3.89E-14    | -0.358496396 | 7.66E-09    |
| 0.355742598  | 1.01E-08    | 0.632997469  | 7.76E-29    | 0.026756851  | 0.676865831 |
| -0.692274552 | 2.74E-36    | -0.628990091 | 2.17E-28    | 0.489116216  | 3.85E-16    |

|              |             |              |             |              |             |
|--------------|-------------|--------------|-------------|--------------|-------------|
| 0.604286117  | 8.87E-26    | 0.42900926   | 2.17E-12    | -0.226550812 | 0.000350852 |
| 0.528974242  | 4.57E-19    | 0.366600763  | 3.30E-09    | -0.364815883 | 3.98E-09    |
| 0.391289835  | 2.18E-10    | 0.519930651  | 2.28E-18    | 0.175859247  | 0.005778391 |
| -0.391898445 | 2.03E-10    | -0.506881766 | 2.13E-17    | 0.116869702  | 0.067818933 |
| 0.526822829  | 6.73E-19    | 0.535013701  | 1.52E-19    | -0.448040974 | 1.69E-13    |
| -0.493671636 | 1.86E-16    | -0.437082379 | 7.48E-13    | 0.450562996  | 1.19E-13    |
| 0.547167757  | 1.55E-20    | 0.637835408  | 2.20E-29    | 0.174274528  | 0.006241115 |
| 0.468551406  | 8.96E-15    | 0.523959905  | 1.12E-18    | -0.196655518 | 0.001983715 |
| 0.641989085  | 7.32E-30    | 0.535502333  | 1.39E-19    | -0.515896858 | 4.60E-18    |
| 0.617175088  | 4.11E-27    | 0.364872868  | 3.95E-09    | -0.319378624 | 3.26E-07    |
| 0.506949482  | 2.11E-17    | 0.577869255  | 3.17E-23    | -0.453872588 | 7.47E-14    |
| 0.623644339  | 8.33E-28    | 0.426856925  | 2.86E-12    | -0.10317159  | 0.107194135 |
| 0.533283352  | 2.09E-19    | 0.742699369  | 3.26E-44    | -0.337460849 | 6.14E-08    |
| -0.350205908 | 1.77E-08    | -0.217683126 | 0.000601157 | 0.364769969  | 4.00E-09    |
| 0.649730813  | 9.00E-31    | 0.423584342  | 4.36E-12    | -0.398149773 | 9.82E-11    |
| -0.514724145 | 5.63E-18    | -0.529514758 | 4.15E-19    | 0.34708701   | 2.41E-08    |
| -0.219080013 | 0.000553038 | -0.163605157 | 0.010316517 | 0.423338051  | 4.50E-12    |
| -0.64863802  | 1.21E-30    | -0.618635899 | 2.88E-27    | 0.218204415  | 0.000582764 |
| 0.491505959  | 2.64E-16    | 0.34199962   | 3.97E-08    | -0.323455786 | 2.26E-07    |
| 0.397104252  | 1.11E-10    | 0.297508839  | 2.13E-06    | -0.433197291 | 1.25E-12    |
| -0.428743238 | 2.24E-12    | -0.478163791 | 2.11E-15    | 0.429394804  | 2.06E-12    |
| -0.280753334 | 8.12E-06    | -0.404067776 | 4.87E-11    | 0.402198511  | 6.09E-11    |
| -0.444884434 | 2.61E-13    | -0.538902982 | 7.41E-20    | 0.259605579  | 3.90E-05    |
| -0.593821726 | 9.71E-25    | -0.530358427 | 3.56E-19    | 0.444577753  | 2.72E-13    |
| 0.663001738  | 2.14E-32    | 0.485601352  | 6.70E-16    | -0.327607566 | 1.54E-07    |
| -0.538519745 | 7.96E-20    | -0.305318228 | 1.11E-06    | 0.4794965    | 1.72E-15    |
| -0.459263374 | 3.47E-14    | -0.423585299 | 4.36E-12    | 0.492449288  | 2.27E-16    |
| -0.151668256 | 0.017520341 | -0.252044021 | 6.62E-05    | 0.179851364  | 0.004746029 |
| -0.394815948 | 1.45E-10    | -0.464062236 | 1.73E-14    | 0.305611482  | 1.08E-06    |
| 0.595524973  | 6.62E-25    | 0.453113683  | 8.31E-14    | -0.149710981 | 0.019047884 |
| 0.56060942   | 1.12E-21    | 0.436579342  | 8.00E-13    | -0.273428273 | 1.42E-05    |
| 0.272195923  | 1.56E-05    | 0.408908313  | 2.72E-11    | 0.146563403  | 0.021747242 |
| 0.590458897  | 2.06E-24    | 0.362269094  | 5.19E-09    | -0.260938926 | 3.54E-05    |
| -0.586083166 | 5.39E-24    | -0.540823598 | 5.18E-20    | 0.368571134  | 2.68E-09    |
| -0.582981035 | 1.06E-23    | -0.523397548 | 1.24E-18    | 0.331699626  | 1.06E-07    |
| -0.234635405 | 0.000210801 | -0.320264026 | 3.01E-07    | 0.275422734  | 1.22E-05    |
| -0.548447009 | 1.22E-20    | -0.278957345 | 9.32E-06    | 0.211582606  | 0.000860183 |
| 0.723224709  | 6.05E-41    | 0.495120486  | 1.48E-16    | -0.260935155 | 3.55E-05    |
| -0.092993897 | 0.146699839 | -0.292970305 | 3.09E-06    | -0.072891179 | 0.255703347 |
| -0.303529006 | 1.29E-06    | -0.182441742 | 0.004168164 | 0.282510105  | 7.08E-06    |

|              |             |              |             |              |             |
|--------------|-------------|--------------|-------------|--------------|-------------|
| 0.331359307  | 1.09E-07    | 0.364096706  | 4.29E-09    | -0.170610359 | 0.007440248 |
| 0.302837562  | 1.37E-06    | 0.377375554  | 1.04E-09    | -0.422097407 | 5.27E-12    |
| -0.644312189 | 3.93E-30    | -0.504703344 | 3.07E-17    | 0.391832392  | 2.05E-10    |
| 0.645884841  | 2.57E-30    | 0.666155073  | 8.55E-33    | -0.322161848 | 2.54E-07    |
| -0.439920387 | 5.11E-13    | -0.577311334 | 3.57E-23    | 0.183454378  | 0.003960084 |
| -0.414047093 | 1.45E-11    | -0.331978991 | 1.03E-07    | 0.261176956  | 3.48E-05    |
| -0.372390138 | 1.78E-09    | -0.410641898 | 2.20E-11    | 0.320309864  | 3.00E-07    |
| -0.4466101   | 2.06E-13    | -0.472981185 | 4.63E-15    | 0.34960062   | 1.88E-08    |
| -0.247208594 | 9.21E-05    | -0.323164262 | 2.32E-07    | 0.319745464  | 3.15E-07    |
| -0.306834382 | 9.74E-07    | -0.375339814 | 1.29E-09    | 0.10322616   | 0.107007531 |
| 0.38407549   | 4.93E-10    | 0.568384001  | 2.30E-22    | 0.031794118  | 0.620432937 |
| -0.392673613 | 1.86E-10    | -0.530237456 | 3.64E-19    | 0.106952956  | 0.094857742 |
| -0.489452511 | 3.65E-16    | -0.538218208 | 8.42E-20    | 0.277767215  | 1.02E-05    |
| -0.218830597 | 0.000561359 | -0.342311694 | 3.85E-08    | 0.186108665  | 0.003458421 |
| -0.154884972 | 0.015241201 | -0.057165243 | 0.372966493 | 0.282912969  | 6.86E-06    |
| -0.596447735 | 5.37E-25    | -0.542749933 | 3.60E-20    | 0.372031499  | 1.85E-09    |
| -0.637022515 | 2.72E-29    | -0.404642678 | 4.55E-11    | 0.415349535  | 1.23E-11    |
| 0.711445683  | 4.23E-39    | 0.746338325  | 7.41E-45    | -0.252479676 | 6.42E-05    |
| -0.633165615 | 7.43E-29    | -0.545603724 | 2.10E-20    | 0.468089318  | 9.60E-15    |
| 0.483934895  | 8.69E-16    | 0.491405226  | 2.68E-16    | -0.116329185 | 0.069109395 |
| -0.291516113 | 3.47E-06    | -0.268994752 | 1.97E-05    | 0.323896464  | 2.17E-07    |
| -0.355274772 | 1.06E-08    | -0.411260386 | 2.04E-11    | 0.45517827   | 6.21E-14    |
| 0.225927969  | 0.000364627 | 0.388561827  | 2.97E-10    | 0.151603473  | 0.017569139 |
| -0.260296314 | 3.71E-05    | -0.391284244 | 2.18E-10    | 0.238928     | 0.000159677 |
| -0.377334033 | 1.04E-09    | -0.322385918 | 2.49E-07    | 0.424880354  | 3.69E-12    |
| 0.592652028  | 1.26E-24    | 0.323238239  | 2.30E-07    | -0.315112858 | 4.75E-07    |
| 0.330246897  | 1.21E-07    | 0.341729607  | 4.07E-08    | -0.071204295 | 0.266898389 |
| -0.5027796   | 4.22E-17    | -0.473262172 | 4.44E-15    | 0.489616073  | 3.56E-16    |
| 0.542181067  | 4.01E-20    | 0.320611614  | 2.92E-07    | -0.318014247 | 3.68E-07    |
| 0.210329623  | 0.000924745 | 0.173578475  | 0.006454633 | -0.044947986 | 0.483737901 |
| -0.681974857 | 7.23E-35    | -0.553965831 | 4.17E-21    | 0.446120861  | 2.20E-13    |
| -0.492561184 | 2.23E-16    | -0.50970157  | 1.33E-17    | 0.512722359  | 7.94E-18    |
| -0.374214425 | 1.46E-09    | -0.454661233 | 6.68E-14    | -0.173345423 | 0.006527569 |
| -0.40330285  | 5.34E-11    | -0.368156978 | 2.80E-09    | 0.395435597  | 1.35E-10    |
| 0.652186901  | 4.57E-31    | 0.439418068  | 5.47E-13    | -0.467513245 | 1.04E-14    |
| 0.267857971  | 2.15E-05    | 0.291115846  | 3.58E-06    | -0.161754865 | 0.01122433  |
| 0.311404075  | 6.57E-07    | 0.527470935  | 5.99E-19    | 0.004192593  | 0.947943795 |
| -0.339893381 | 4.86E-08    | -0.375633859 | 1.25E-09    | 0.355937176  | 9.95E-09    |
| 0.417559232  | 9.34E-12    | 0.193215347  | 0.002385446 | -0.400561274 | 7.39E-11    |
| -0.232367518 | 0.000243623 | -0.339921263 | 4.85E-08    | 0.136928898  | 0.032159967 |

|              |             |              |             |              |             |
|--------------|-------------|--------------|-------------|--------------|-------------|
| 0.391752276  | 2.07E-10    | 0.60106118   | 1.87E-25    | -0.253339689 | 6.05E-05    |
| -0.190192145 | 0.002798145 | -0.251076748 | 7.08E-05    | 0.144305114  | 0.023882282 |
| -0.332049635 | 1.02E-07    | -0.223473668 | 0.00042395  | 0.279818667  | 8.72E-06    |
| 0.435206444  | 9.60E-13    | 0.406927808  | 3.45E-11    | -0.590103294 | 2.23E-24    |
| 0.54556413   | 2.11E-20    | 0.506961947  | 2.10E-17    | -0.265001701 | 2.64E-05    |
| -0.543376921 | 3.20E-20    | -0.481963826 | 1.18E-15    | 0.594160631  | 9.00E-25    |
| -0.413159839 | 1.61E-11    | -0.42254672  | 4.98E-12    | 0.511199279  | 1.03E-17    |
| -0.621691953 | 1.35E-27    | -0.59147932  | 1.64E-24    | 0.377747647  | 9.94E-10    |
| -0.513230359 | 7.27E-18    | -0.367555518 | 2.98E-09    | 0.037725328  | 0.556744275 |
| -0.506606979 | 2.23E-17    | -0.52326905  | 1.27E-18    | 0.328068685  | 1.48E-07    |
| -0.447479412 | 1.82E-13    | -0.510526899 | 1.15E-17    | 0.378057719  | 9.61E-10    |
| -0.479432735 | 1.74E-15    | -0.333800916 | 8.68E-08    | 0.642081797  | 7.14E-30    |
| -0.517296935 | 3.61E-18    | -0.464482077 | 1.63E-14    | 0.328750786  | 1.39E-07    |
| -0.446866076 | 1.98E-13    | -0.383320392 | 5.37E-10    | 0.601626132  | 1.64E-25    |
| 0.432269896  | 1.42E-12    | 0.492348443  | 2.30E-16    | -0.606994746 | 4.71E-26    |
| 0.433290299  | 1.24E-12    | 0.184907512  | 0.00367785  | -0.179853271 | 0.004745578 |
| -0.532279339 | 2.51E-19    | -0.29806247  | 2.03E-06    | 0.332878673  | 9.47E-08    |
| -0.64193056  | 7.44E-30    | -0.65611344  | 1.53E-31    | 0.367004606  | 3.16E-09    |
| -0.545784626 | 2.03E-20    | -0.486209311 | 6.09E-16    | 0.352223786  | 1.45E-08    |
| 0.597404577  | 4.32E-25    | 0.634201673  | 5.68E-29    | -0.472449298 | 5.02E-15    |
| 0.448071636  | 1.68E-13    | 0.268816498  | 2.00E-05    | -0.210534095 | 0.000913913 |
| 0.370082008  | 2.28E-09    | 0.275046139  | 1.26E-05    | 0.195563006  | 0.002104052 |
| 0.668901054  | 3.81E-33    | 0.578346069  | 2.86E-23    | -0.454572413 | 6.77E-14    |
| -0.37185477  | 1.88E-09    | -0.400095936 | 7.81E-11    | 0.441437562  | 4.17E-13    |
| 0.495231676  | 1.45E-16    | 0.409610579  | 2.49E-11    | 0.048251622  | 0.452151509 |
| 0.247372528  | 9.11E-05    | 0.189673367  | 0.002875151 | -0.381138825 | 6.84E-10    |
| -0.266401709 | 2.39E-05    | -0.237119916 | 0.000179606 | 0.239409304  | 0.000154731 |
| -0.183140515 | 0.004023552 | -0.379439913 | 8.25E-10    | 0.249806385  | 7.72E-05    |
| 0.399604055  | 8.28E-11    | 0.309629371  | 7.67E-07    | -0.118475071 | 0.064101891 |
| -0.629632357 | 1.84E-28    | -0.536000835 | 1.27E-19    | 0.247778766  | 8.86E-05    |
| 0.571981429  | 1.09E-22    | 0.404985967  | 4.36E-11    | -0.150294737 | 0.018580624 |
| -0.635228413 | 4.35E-29    | -0.474982165 | 3.43E-15    | 0.433944808  | 1.13E-12    |
| -0.467905108 | 9.86E-15    | -0.518528781 | 2.91E-18    | 0.381322504  | 6.70E-10    |
| -0.396659479 | 1.17E-10    | -0.383586713 | 5.21E-10    | -0.01971002  | 0.758871768 |
| -0.585055679 | 6.75E-24    | -0.623554508 | 8.52E-28    | 0.367978914  | 2.85E-09    |
| -0.315462956 | 4.61E-07    | -0.273177303 | 1.45E-05    | 0.295867676  | 2.44E-06    |
| -0.504128125 | 3.38E-17    | -0.348926202 | 2.01E-08    | 0.497682595  | 9.75E-17    |
| -0.31441639  | 5.05E-07    | -0.325531075 | 1.87E-07    | 0.244699519  | 0.000109034 |
| -0.320895454 | 2.84E-07    | -0.349194805 | 1.96E-08    | 0.291925494  | 3.36E-06    |
| 0.535156004  | 1.48E-19    | 0.454690045  | 6.66E-14    | -0.125609483 | 0.049549872 |

|              |             |              |             |              |             |
|--------------|-------------|--------------|-------------|--------------|-------------|
| 0.604630039  | 8.19E-26    | 0.487531728  | 4.95E-16    | -0.369203355 | 2.50E-09    |
| -0.14311678  | 0.025076625 | -0.241236286 | 0.000137233 | 0.033870673  | 0.597776964 |
| -0.516300428 | 4.29E-18    | -0.526898332 | 6.64E-19    | 0.256113839  | 4.99E-05    |
| -0.309556113 | 7.71E-07    | -0.226233383 | 0.000357811 | 0.061128986  | 0.340682231 |
| -0.40833925  | 2.91E-11    | -0.357092955 | 8.84E-09    | 0.431068589  | 1.66E-12    |
| -0.466931083 | 1.14E-14    | -0.361617479 | 5.55E-09    | 0.274065684  | 1.35E-05    |
| -0.304004942 | 1.24E-06    | -0.326552779 | 1.70E-07    | 0.236813303  | 0.000183208 |
| -0.023610901 | 0.713074325 | -0.17430916  | 0.006230659 | -0.003830834 | 0.952429933 |
| -0.552423145 | 5.63E-21    | -0.46192748  | 2.36E-14    | 0.468310169  | 9.29E-15    |
| 0.555959461  | 2.81E-21    | 0.410674626  | 2.19E-11    | -0.080322067 | 0.210265823 |
| -0.30514723  | 1.12E-06    | -0.308505329 | 8.44E-07    | 0.154710453  | 0.015357845 |
| -0.350654865 | 1.69E-08    | -0.348301329 | 2.14E-08    | 0.25821231   | 4.30E-05    |
| 0.548009898  | 1.32E-20    | 0.297655365  | 2.10E-06    | -0.066293904 | 0.30137258  |
| 0.307269696  | 9.39E-07    | 0.481092984  | 1.35E-15    | -0.484621712 | 7.80E-16    |
| -0.279541168 | 8.91E-06    | -0.229187616 | 0.000297722 | 0.333495076  | 8.93E-08    |
| 0.42604654   | 3.18E-12    | 0.483419351  | 9.41E-16    | -0.426857056 | 2.86E-12    |
| 0.463030296  | 2.01E-14    | 0.414016795  | 1.45E-11    | 0.127989424  | 0.045355269 |
| -0.431871709 | 1.49E-12    | -0.434888295 | 1.00E-12    | 0.422170515  | 5.22E-12    |
| 0.559171355  | 1.49E-21    | 0.453355989  | 8.03E-14    | -0.410286556 | 2.30E-11    |
| -0.189331492 | 0.002926944 | -0.303398801 | 1.30E-06    | 0.121980607  | 0.056564614 |
| -0.463429164 | 1.90E-14    | -0.527033873 | 6.48E-19    | 0.383654184  | 5.17E-10    |
| 0.538072855  | 8.65E-20    | 0.640144812  | 1.20E-29    | -0.503182826 | 3.95E-17    |
| -0.413185291 | 1.61E-11    | -0.421156503 | 5.94E-12    | 0.415126534  | 1.26E-11    |
| 0.345404592  | 2.85E-08    | 0.308138363  | 8.71E-07    | -0.077620516 | 0.226061346 |
| 0.618398888  | 3.05E-27    | 0.458458134  | 3.89E-14    | 0.018682475  | 0.771084285 |
| 0.42688667   | 2.85E-12    | 0.280549001  | 8.25E-06    | -0.328344973 | 1.44E-07    |
| -0.541465045 | 4.59E-20    | -0.506355818 | 2.33E-17    | 0.502955969  | 4.10E-17    |
| -0.607688384 | 4.00E-26    | -0.562759112 | 7.25E-22    | 0.218770642  | 0.000563377 |
| -0.494382301 | 1.66E-16    | -0.402154262 | 6.12E-11    | 0.207904874  | 0.001062524 |
| 0.547327451  | 1.51E-20    | 0.425807229  | 3.28E-12    | 0.077533972  | 0.226580898 |
| 0.265831177  | 2.49E-05    | 0.284430006  | 6.10E-06    | -0.09347583  | 0.1446087   |
| 0.434530337  | 1.05E-12    | 0.339512869  | 5.04E-08    | -0.482143048 | 1.15E-15    |
| -0.219556995 | 0.000537441 | -0.240646803 | 0.000142666 | 0.182869288  | 0.004079137 |
| -0.490133034 | 3.28E-16    | -0.478314078 | 2.07E-15    | 0.036249456  | 0.57229302  |
| -0.338267093 | 5.68E-08    | -0.333922074 | 8.58E-08    | 0.331952241  | 1.03E-07    |
| -0.529251998 | 4.35E-19    | -0.532010301 | 2.64E-19    | 0.350103586  | 1.79E-08    |
| 0.467417219  | 1.06E-14    | 0.342478513  | 3.79E-08    | -0.167849119 | 0.008475374 |
| 0.448984236  | 1.48E-13    | 0.2531558    | 6.13E-05    | -0.470740632 | 6.48E-15    |
| -0.485340504 | 6.98E-16    | -0.46257867  | 2.15E-14    | 0.092807976  | 0.147512676 |
| 0.203941705  | 0.001328886 | 0.18630449   | 0.003423792 | -0.203479671 | 0.001363634 |



|              |             |              |             |              |             |
|--------------|-------------|--------------|-------------|--------------|-------------|
| 0.365915393  | 3.54E-09    | 0.248317243  | 8.54E-05    | -0.347002278 | 2.43E-08    |
| 0.583274526  | 9.94E-24    | 0.53637036   | 1.19E-19    | -0.426930172 | 2.84E-12    |
| 0.450073419  | 1.27E-13    | 0.362388492  | 5.12E-09    | -0.400658911 | 7.31E-11    |
| 0.500009104  | 6.67E-17    | 0.303140488  | 1.33E-06    | -0.361524621 | 5.61E-09    |
| 0.544807031  | 2.44E-20    | 0.686704175  | 1.64E-35    | -0.236436434 | 0.000187727 |
| 0.434854513  | 1.01E-12    | 0.227560889  | 0.000329536 | -0.340939785 | 4.40E-08    |
| -0.244712949 | 0.000108936 | -0.238820812 | 0.000160798 | 0.283272943  | 6.67E-06    |
| -0.20128217  | 0.001540588 | -0.284824323 | 5.91E-06    | -0.004613437 | 0.942727012 |
| -0.634443243 | 5.34E-29    | -0.636747332 | 2.93E-29    | 0.18287081   | 0.004078823 |
| -0.52336806  | 1.25E-18    | -0.335870865 | 7.14E-08    | 0.632550398  | 8.71E-29    |
| 0.555965553  | 2.81E-21    | 0.437551127  | 7.03E-13    | -0.32017925  | 3.03E-07    |
| -0.523670875 | 1.18E-18    | -0.378215001 | 9.45E-10    | 0.595539821  | 6.60E-25    |
| 0.704527805  | 4.64E-38    | 0.58494822   | 6.91E-24    | -0.498492049 | 8.54E-17    |
| 0.617019688  | 4.27E-27    | 0.467784818  | 1.00E-14    | -0.333517759 | 8.91E-08    |
| -0.522876938 | 1.36E-18    | -0.443079196 | 3.33E-13    | 0.300584137  | 1.65E-06    |
| -0.676807759 | 3.55E-34    | -0.559922254 | 1.28E-21    | 0.607781177  | 3.91E-26    |
| -0.313485127 | 5.48E-07    | -0.385352719 | 4.27E-10    | 0.265689804  | 2.52E-05    |
| -0.570986543 | 1.34E-22    | -0.567078576 | 3.01E-22    | 0.530122564  | 3.72E-19    |
| -0.702284933 | 9.94E-38    | -0.658254214 | 8.33E-32    | 0.318376669  | 3.56E-07    |
| -0.405944647 | 3.89E-11    | -0.447377132 | 1.85E-13    | 0.451323212  | 1.07E-13    |
| -0.554318726 | 3.89E-21    | -0.513432279 | 7.03E-18    | 0.411185348  | 2.06E-11    |
| -0.584919818 | 6.95E-24    | -0.510511677 | 1.16E-17    | 0.44514469   | 2.51E-13    |
| -0.538543293 | 7.92E-20    | -0.451325947 | 1.07E-13    | 0.397050735  | 1.12E-10    |
| 0.566490333  | 3.40E-22    | 0.300751974  | 1.63E-06    | -0.442392399 | 3.66E-13    |
| 0.585477329  | 6.16E-24    | 0.379614726  | 8.10E-10    | -0.469347448 | 7.97E-15    |
| -0.236083082 | 0.000192059 | -0.338712011 | 5.45E-08    | -0.054274389 | 0.397660063 |
| 0.462085887  | 2.31E-14    | 0.328794453  | 1.38E-07    | -0.310726208 | 6.97E-07    |
| 0.455331762  | 6.08E-14    | 0.35131585   | 1.59E-08    | -0.3002798   | 1.69E-06    |
| 0.343355473  | 3.48E-08    | 0.169824466  | 0.007722734 | -0.252583501 | 6.38E-05    |
| 0.572754961  | 9.31E-23    | 0.46780958   | 1.00E-14    | -0.211333042 | 0.000872701 |
| 0.342492406  | 3.78E-08    | 0.324059707  | 2.14E-07    | -0.050792135 | 0.428671004 |
| 0.099489561  | 0.120387339 | 0.028033588  | 0.662374724 | -0.392654866 | 1.86E-10    |
| -0.512000491 | 8.98E-18    | -0.494556452 | 1.62E-16    | 0.216992466  | 0.000626353 |
| 0.162255253  | 0.010972119 | 0.19103103   | 0.002677575 | -0.272062846 | 1.57E-05    |
| 0.552881599  | 5.15E-21    | 0.268638087  | 2.03E-05    | -0.259120726 | 4.03E-05    |
| 0.513813529  | 6.58E-18    | 0.607736802  | 3.95E-26    | 0.01046257   | 0.870571909 |
| -0.527967805 | 5.48E-19    | -0.598711328 | 3.21E-25    | 0.309298737  | 7.89E-07    |
| 0.454601989  | 6.74E-14    | 0.30668402   | 9.87E-07    | -0.400270518 | 7.65E-11    |
| 0.592982296  | 1.17E-24    | 0.529086936  | 4.48E-19    | -0.355811206 | 1.01E-08    |
| 0.583080836  | 1.04E-23    | 0.435682478  | 9.01E-13    | -0.400688924 | 7.28E-11    |

|              |             |              |             |              |             |
|--------------|-------------|--------------|-------------|--------------|-------------|
| 0.495698474  | 1.34E-16    | 0.344367785  | 3.15E-08    | -0.270998024 | 1.70E-05    |
| -0.512231292 | 8.63E-18    | -0.39327709  | 1.73E-10    | 0.113919259  | 0.07510905  |
| -0.31455326  | 4.99E-07    | -0.326161672 | 1.76E-07    | 0.157945264  | 0.013318129 |
| -0.520221313 | 2.17E-18    | -0.548309101 | 1.25E-20    | 0.075972088  | 0.236103285 |
| -0.524334398 | 1.05E-18    | -0.492719808 | 2.17E-16    | 0.482198245  | 1.14E-15    |
| -0.501548401 | 5.18E-17    | -0.508366027 | 1.66E-17    | 0.373975389  | 1.50E-09    |
| -0.130358228 | 0.041479829 | -0.212110376 | 0.000834254 | 0.154583404  | 0.015443252 |
| -0.553819361 | 4.29E-21    | -0.510506038 | 1.16E-17    | 0.300401469  | 1.68E-06    |
| -0.434694555 | 1.03E-12    | -0.43317919  | 1.26E-12    | 0.312721443  | 5.86E-07    |
| 0.589400799  | 2.60E-24    | 0.332434261  | 9.87E-08    | -0.333781727 | 8.70E-08    |
| 0.346988836  | 2.44E-08    | 0.297038377  | 2.21E-06    | 0.023752682  | 0.711427842 |
| -0.370941339 | 2.08E-09    | -0.343146495 | 3.55E-08    | 0.547895471  | 1.35E-20    |
| -0.490239998 | 3.22E-16    | -0.494477825 | 1.64E-16    | 0.252939766  | 6.22E-05    |
| 0.637433152  | 2.44E-29    | 0.475488868  | 3.17E-15    | -0.346819593 | 2.48E-08    |
| -0.414669901 | 1.34E-11    | -0.490716214 | 2.99E-16    | 0.437013322  | 7.55E-13    |
| -0.417986466 | 8.85E-12    | -0.417708602 | 9.17E-12    | 0.245029561  | 0.000106651 |
| -0.198279733 | 0.001816387 | -0.389677826 | 2.62E-10    | -0.033640953 | 0.600264852 |
| 0.729822857  | 5.09E-42    | 0.477805851  | 2.23E-15    | -0.324845655 | 1.99E-07    |
| -0.298658502 | 1.94E-06    | -0.355358635 | 1.06E-08    | 0.164146899  | 0.010063311 |
| -0.630434608 | 1.50E-28    | -0.539422397 | 6.73E-20    | 0.542427806  | 3.83E-20    |
| -0.629406812 | 1.95E-28    | -0.464844353 | 1.55E-14    | 0.598489613  | 3.38E-25    |
| -0.251770214 | 6.75E-05    | -0.541651437 | 4.43E-20    | 0.346039873  | 2.68E-08    |
| -0.330540826 | 1.18E-07    | -0.431794602 | 1.51E-12    | 0.238463083  | 0.000164594 |
| -0.39833694  | 9.61E-11    | -0.210397912 | 0.000921114 | 0.250253955  | 7.49E-05    |
| -0.243400924 | 0.000118902 | -0.476615324 | 2.68E-15    | 0.150563891  | 0.018368562 |
| -0.461167946 | 2.64E-14    | -0.536716113 | 1.11E-19    | 0.257466477  | 4.54E-05    |
| 0.467670434  | 1.02E-14    | 0.344412192  | 3.14E-08    | -0.386365059 | 3.81E-10    |
| -0.266127221 | 2.44E-05    | -0.512638673 | 8.05E-18    | 0.041334389  | 0.519606504 |
| -0.392794735 | 1.83E-10    | -0.502640934 | 4.32E-17    | 0.188401892  | 0.003072083 |
| -0.477753362 | 2.25E-15    | -0.469454345 | 7.84E-15    | 0.090750883  | 0.156735878 |
| 0.423419241  | 4.45E-12    | 0.288569204  | 4.39E-06    | -0.679947089 | 1.36E-34    |
| 0.406629728  | 3.58E-11    | 0.309907857  | 7.48E-07    | -0.464233354 | 1.69E-14    |
| -0.232509167 | 0.000241441 | -0.471380455 | 5.89E-15    | 0.023498507  | 0.714380475 |
| -0.182495994 | 0.004156771 | -0.201267436 | 0.001541842 | 0.372659989  | 1.73E-09    |
| -0.410448621 | 2.25E-11    | -0.417611522 | 9.28E-12    | 0.423015275  | 4.69E-12    |
| -0.578579218 | 2.72E-23    | -0.621733169 | 1.34E-27    | 0.270054326  | 1.83E-05    |
| -0.556196071 | 2.69E-21    | -0.492024758 | 2.43E-16    | 0.556930891  | 2.32E-21    |
| 0.444934033  | 2.59E-13    | 0.248441679  | 8.47E-05    | -0.334798819 | 7.90E-08    |
| -0.338343848 | 5.64E-08    | -0.455119168 | 6.26E-14    | 0.15832136   | 0.013097164 |
| -0.159098448 | 0.012650788 | -0.200168013 | 0.001638117 | 0.238629628  | 0.000162816 |

|              |             |              |             |              |             |
|--------------|-------------|--------------|-------------|--------------|-------------|
| 0.621926127  | 1.28E-27    | 0.5176884    | 3.37E-18    | -0.523065307 | 1.31E-18    |
| 0.527750415  | 5.70E-19    | 0.645437914  | 2.90E-30    | -0.029233783 | 0.648865864 |
| 0.46808897   | 9.60E-15    | 0.360006702  | 6.56E-09    | -0.276101237 | 1.16E-05    |
| -0.299375446 | 1.82E-06    | -0.122618162 | 0.055275885 | 0.266269447  | 2.41E-05    |
| 0.253507526  | 5.98E-05    | 0.148048127  | 0.020435281 | -0.369223884 | 2.50E-09    |
| 0.371570619  | 1.94E-09    | 0.332771966  | 9.56E-08    | -0.17362087  | 0.006441444 |
| -0.368366703 | 2.73E-09    | -0.203076378 | 0.001394644 | 0.528447835  | 5.03E-19    |
| -0.376020027 | 1.20E-09    | -0.22225568  | 0.000456606 | 0.135722194  | 0.033723791 |
| 0.499838654  | 6.85E-17    | 0.448791586  | 1.52E-13    | -0.312250064 | 6.11E-07    |
| -0.312068376 | 6.21E-07    | -0.305427698 | 1.10E-06    | 0.321192158  | 2.77E-07    |
| 0.525238782  | 8.93E-19    | 0.461877231  | 2.38E-14    | -0.259405888 | 3.95E-05    |
| 0.608598796  | 3.22E-26    | 0.559330046  | 1.44E-21    | -0.522216261 | 1.53E-18    |
| -0.295507108 | 2.51E-06    | -0.279478785 | 8.96E-06    | 0.175694973  | 0.005824887 |
| -0.548379172 | 1.23E-20    | -0.580063842 | 1.98E-23    | 0.354601683  | 1.14E-08    |
| 0.333322046  | 9.08E-08    | 0.288623679  | 4.38E-06    | -0.24579572  | 0.000101306 |
| 0.372820448  | 1.70E-09    | 0.256329309  | 4.91E-05    | 0.062158748  | 0.332595136 |
| -0.541617537 | 4.46E-20    | -0.404924883 | 4.40E-11    | 0.628138549  | 2.69E-28    |
| 0.608083799  | 3.64E-26    | 0.581345829  | 1.51E-23    | -0.418997236 | 7.80E-12    |
| 0.569359899  | 1.88E-22    | 0.411704176  | 1.93E-11    | -0.383512266 | 5.25E-10    |
| 0.662746991  | 2.30E-32    | 0.566989919  | 3.07E-22    | -0.5470383   | 1.59E-20    |
| 0.542113525  | 4.06E-20    | 0.416290343  | 1.09E-11    | -0.371968253 | 1.86E-09    |
| 0.124691681  | 0.05125165  | 0.17664516   | 0.005560519 | 0.045567979  | 0.477720893 |
| -0.559617281 | 1.36E-21    | -0.512195256 | 8.68E-18    | 0.511754402  | 9.36E-18    |
| -0.502643566 | 4.32E-17    | -0.469415579 | 7.89E-15    | 0.663879603  | 1.66E-32    |
| 0.452234926  | 9.41E-14    | 0.437112214  | 7.45E-13    | -0.205864666 | 0.001192813 |
| 0.443283605  | 3.24E-13    | 0.336965498  | 6.43E-08    | -0.289044432 | 4.23E-06    |
| 0.474265994  | 3.82E-15    | 0.44283255   | 3.45E-13    | -0.068199562 | 0.287658964 |
| -0.480492949 | 1.48E-15    | -0.567117136 | 2.99E-22    | 0.241495128  | 0.00013491  |
| 0.557064491  | 2.26E-21    | 0.357766377  | 8.25E-09    | -0.255046944 | 5.37E-05    |
| 0.419367705  | 7.44E-12    | 0.354224864  | 1.18E-08    | -0.278645755 | 9.55E-06    |
| -0.456345977 | 5.26E-14    | -0.457429439 | 4.51E-14    | 0.299575449  | 1.79E-06    |
| -0.371458081 | 1.97E-09    | -0.275436423 | 1.22E-05    | 0.140949375  | 0.027387627 |
| -0.46895524  | 8.44E-15    | -0.546234981 | 1.86E-20    | 0.20272552   | 0.001422146 |
| -0.47100079  | 6.23E-15    | -0.579175286 | 2.40E-23    | 0.198067445  | 0.0018375   |
| 0.348870032  | 2.02E-08    | 0.393687189  | 1.65E-10    | -0.281260777 | 7.80E-06    |
| -0.580663767 | 1.74E-23    | -0.66671913  | 7.25E-33    | 0.262942887  | 3.07E-05    |
| -0.400676561 | 7.29E-11    | -0.468478268 | 9.06E-15    | 0.409219097  | 2.62E-11    |
| -0.420614547 | 6.36E-12    | -0.570716095 | 1.42E-22    | 0.463301827  | 1.94E-14    |
| -0.660891229 | 3.93E-32    | -0.592616725 | 1.27E-24    | 0.482795996  | 1.04E-15    |
| -0.239524167 | 0.000153572 | -0.114798895 | 0.072871938 | 0.254521623  | 5.58E-05    |

|              |             |              |             |              |             |
|--------------|-------------|--------------|-------------|--------------|-------------|
| -0.382648215 | 5.78E-10    | -0.416619138 | 1.05E-11    | 0.049527394  | 0.440271076 |
| -0.480056285 | 1.58E-15    | -0.341674374 | 4.09E-08    | 0.567653605  | 2.68E-22    |
| -0.375777236 | 1.23E-09    | -0.360157699 | 6.46E-09    | 0.275849614  | 1.18E-05    |
| 0.343151161  | 3.55E-08    | 0.368190378  | 2.79E-09    | -0.064232544 | 0.316686117 |
| -0.145953039 | 0.022307356 | -0.289022    | 4.24E-06    | 0.007283725  | 0.909692201 |
| 0.335062137  | 7.71E-08    | 0.24639726   | 9.73E-05    | -0.234438502 | 0.000213478 |
| -0.295369387 | 2.54E-06    | -0.398033074 | 9.96E-11    | 0.273886167  | 1.37E-05    |
| 0.534262121  | 1.75E-19    | 0.396490944  | 1.19E-10    | -0.085890847 | 0.180243196 |
| 0.485202709  | 7.13E-16    | 0.370071291  | 2.28E-09    | -0.289738315 | 4.00E-06    |
| -0.513562917 | 6.87E-18    | -0.451068697 | 1.11E-13    | 0.339980355  | 4.82E-08    |
| -0.17894378  | 0.00496494  | -0.270753232 | 1.73E-05    | 0.17336362   | 0.006521848 |
| 0.304461216  | 1.19E-06    | 0.196788405  | 0.001969514 | -0.271107066 | 1.69E-05    |
| 0.463611752  | 1.85E-14    | 0.419973148  | 6.89E-12    | -0.438696751 | 6.03E-13    |
| 0.47286573   | 4.71E-15    | 0.406710265  | 3.55E-11    | -0.143646978 | 0.024537542 |
| 0.488130005  | 4.50E-16    | 0.373529068  | 1.57E-09    | -0.205499782 | 0.001217605 |
| 0.468742904  | 8.71E-15    | 0.475538044  | 3.15E-15    | -0.064672069 | 0.313379126 |
| -0.5210813   | 1.86E-18    | -0.348275659 | 2.15E-08    | 0.579406036  | 2.28E-23    |
| -0.245910722 | 0.000100526 | -0.229929157 | 0.000284189 | 0.002348529  | 0.970825996 |
| 0.301396974  | 1.54E-06    | 0.303965156  | 1.24E-06    | -0.131403375 | 0.039860712 |
| 0.422999413  | 4.70E-12    | 0.289097346  | 4.21E-06    | -0.234652719 | 0.000210567 |
| 0.622329237  | 1.16E-27    | 0.606730938  | 5.01E-26    | -0.12831921  | 0.044798198 |
| -0.333161096 | 9.22E-08    | -0.348062269 | 2.19E-08    | 0.239023669  | 0.000158682 |
| 0.50200609   | 4.80E-17    | 0.533626068  | 1.96E-19    | -0.22680434  | 0.000345384 |
| 0.431591707  | 1.55E-12    | 0.410529903  | 2.23E-11    | -0.020526603 | 0.74920885  |
| 0.447625153  | 1.79E-13    | 0.42589187   | 3.24E-12    | 0.046011571  | 0.473440943 |
| 0.238862418  | 0.000160362 | 0.274279182  | 1.33E-05    | -0.397796694 | 1.02E-10    |
| -0.308308372 | 8.59E-07    | -0.382880821 | 5.64E-10    | 0.002590607  | 0.967820385 |
| 0.362998803  | 4.81E-09    | 0.316534515  | 4.19E-07    | -0.327737163 | 1.53E-07    |
| 0.539669455  | 6.42E-20    | 0.40442068   | 4.67E-11    | 0.053655984  | 0.403066877 |
| -0.358926315 | 7.33E-09    | -0.416952557 | 1.01E-11    | 0.23035883   | 0.000276613 |
| 0.494429839  | 1.65E-16    | 0.569745068  | 1.74E-22    | -0.355814604 | 1.01E-08    |
| 0.392476439  | 1.90E-10    | 0.209347702  | 0.000978427 | -0.305683746 | 1.07E-06    |
| 0.452988418  | 8.46E-14    | 0.458885046  | 3.66E-14    | -0.305021433 | 1.14E-06    |
| 0.577931875  | 3.13E-23    | 0.527406581  | 6.06E-19    | -0.101352123 | 0.113563775 |
| -0.369683289 | 2.38E-09    | -0.373200774 | 1.63E-09    | 0.382165923  | 6.10E-10    |
| -0.188863242 | 0.002999256 | -0.237547275 | 0.000174696 | 0.087253726  | 0.173403075 |
| -0.396683406 | 1.17E-10    | -0.425776954 | 3.29E-12    | 0.093316374  | 0.145298061 |
| -0.530294501 | 3.60E-19    | -0.444684731 | 2.68E-13    | 0.606271107  | 5.58E-26    |
| 0.677281356  | 3.07E-34    | 0.504917633  | 2.96E-17    | -0.160174247 | 0.012054936 |
| 0.331023833  | 1.13E-07    | 0.284904658  | 5.87E-06    | -0.33310502  | 9.27E-08    |

|              |             |              |             |              |             |
|--------------|-------------|--------------|-------------|--------------|-------------|
| -0.375682198 | 1.25E-09    | -0.521922378 | 1.61E-18    | 0.187341128  | 0.003245646 |
| 0.417601296  | 9.29E-12    | 0.367983117  | 2.85E-09    | -0.316892963 | 4.06E-07    |
| -0.495342897 | 1.42E-16    | -0.526365901 | 7.31E-19    | 0.221497849  | 0.000478085 |
| 0.416483402  | 1.07E-11    | 0.472023919  | 5.35E-15    | -0.314814919 | 4.88E-07    |
| -0.48740102  | 5.05E-16    | -0.560704247 | 1.10E-21    | 0.337043134  | 6.39E-08    |
| -0.471218462 | 6.03E-15    | -0.514303886 | 6.05E-18    | 0.512436562  | 8.33E-18    |
| 0.396017874  | 1.26E-10    | 0.487563245  | 4.92E-16    | -0.382049641 | 6.18E-10    |
| 0.329457792  | 1.30E-07    | 0.283791747  | 6.41E-06    | -0.000974596 | 0.987891106 |
| -0.577844774 | 3.18E-23    | -0.565812282 | 3.90E-22    | 0.41556497   | 1.20E-11    |
| 0.506251463  | 2.37E-17    | 0.394847766  | 1.44E-10    | -0.501978731 | 4.82E-17    |
| 0.378432331  | 9.22E-10    | 0.332266599  | 1.00E-07    | -0.200388261 | 0.001618401 |
| 0.410606616  | 2.21E-11    | 0.277229193  | 1.06E-05    | -0.382163104 | 6.11E-10    |
| 0.717819183  | 4.36E-40    | 0.701578829  | 1.26E-37    | -0.492861676 | 2.12E-16    |
| -0.336480171 | 6.74E-08    | -0.279302271 | 9.08E-06    | 0.463063474  | 2.00E-14    |
| 0.403221354  | 5.39E-11    | 0.408877382  | 2.73E-11    | 0.081005272  | 0.206400127 |
| 0.660848579  | 3.97E-32    | 0.630073707  | 1.64E-28    | -0.119474411 | 0.061873652 |
| -0.459918905 | 3.16E-14    | -0.596407768 | 5.42E-25    | 0.342738535  | 3.69E-08    |
| 0.60127376   | 1.78E-25    | 0.476830687  | 2.59E-15    | -0.517372856 | 3.56E-18    |
| 0.625715393  | 4.96E-28    | 0.493813475  | 1.82E-16    | -0.36846519  | 2.71E-09    |
| 0.390207185  | 2.47E-10    | 0.126950079  | 0.04714901  | -0.482716552 | 1.05E-15    |
| -0.611219132 | 1.73E-26    | -0.624557378 | 6.63E-28    | 0.281608224  | 7.60E-06    |
| 0.631216692  | 1.23E-28    | 0.564785036  | 4.81E-22    | -0.044573277 | 0.487394156 |
| 0.476649437  | 2.66E-15    | 0.278749648  | 9.47E-06    | -0.380132651 | 7.65E-10    |
| -0.516497713 | 4.15E-18    | -0.385069095 | 4.41E-10    | 0.134482912  | 0.035396636 |
| -0.572911991 | 9.01E-23    | -0.450721024 | 1.16E-13    | 0.317105666  | 3.99E-07    |
| -0.350285476 | 1.76E-08    | -0.369129051 | 2.52E-09    | 0.304987675  | 1.14E-06    |
| -0.525269339 | 8.89E-19    | -0.607169736 | 4.52E-26    | 0.194537487  | 0.002223025 |
| 0.389387171  | 2.71E-10    | 0.257107193  | 4.65E-05    | -0.228670427 | 0.000307512 |
| -0.611542633 | 1.60E-26    | -0.611246408 | 1.72E-26    | 0.350221414  | 1.77E-08    |
| 0.494898528  | 1.53E-16    | 0.37611027   | 1.19E-09    | -0.29081657  | 3.67E-06    |
| -0.649039901 | 1.09E-30    | -0.627107121 | 3.49E-28    | 0.204347375  | 0.001299048 |
| 0.718482938  | 3.43E-40    | 0.482301521  | 1.12E-15    | -0.175191304 | 0.00596954  |
| -0.550579381 | 8.06E-21    | -0.562254924 | 8.02E-22    | 0.369437833  | 2.44E-09    |
| 0.198599421  | 0.001785012 | 0.150226111  | 0.018635033 | -0.388094788 | 3.14E-10    |
| -0.676393959 | 4.03E-34    | -0.666266761 | 8.28E-33    | 0.569185322  | 1.95E-22    |
| 0.528335377  | 5.13E-19    | 0.690792046  | 4.42E-36    | -0.242273215 | 0.000128145 |
| -0.277297966 | 1.06E-05    | -0.267604544 | 2.19E-05    | 0.280731019  | 8.13E-06    |
| 0.55859532   | 1.67E-21    | 0.505467431  | 2.70E-17    | -0.267978572 | 2.13E-05    |
| 0.231964243  | 0.000249937 | 0.277129215  | 1.07E-05    | -0.315402588 | 4.63E-07    |
| -0.484127484 | 8.43E-16    | -0.372132022 | 1.83E-09    | 0.529405626  | 4.23E-19    |

|              |             |              |             |              |             |
|--------------|-------------|--------------|-------------|--------------|-------------|
| -0.362959497 | 4.83E-09    | -0.350814905 | 1.67E-08    | 0.248268614  | 8.57E-05    |
| -0.185443707 | 0.003578388 | -0.348927042 | 2.01E-08    | 0.184285092  | 0.003796436 |
| -0.661508181 | 3.29E-32    | -0.503486546 | 3.76E-17    | 0.40073036   | 7.25E-11    |
| 0.372513939  | 1.76E-09    | 0.239825739  | 0.000150568 | -0.556509489 | 2.52E-21    |
| 0.6068272    | 4.90E-26    | 0.446673569  | 2.04E-13    | -0.413677395 | 1.51E-11    |
| 0.311496953  | 6.52E-07    | 0.096690177  | 0.131237673 | -0.293317051 | 3.00E-06    |
| 0.427942598  | 2.49E-12    | 0.378819747  | 8.84E-10    | -0.218573469 | 0.000570059 |
| -0.118574173 | 0.063878021 | -0.18905161  | 0.002969974 | 0.1023304    | 0.110103136 |
| 0.580054644  | 1.99E-23    | 0.632953245  | 7.85E-29    | -0.176110407 | 0.005707946 |
| -0.277542148 | 1.04E-05    | -0.437317542 | 7.25E-13    | 0.212347599  | 0.000822835 |
| -0.401814588 | 6.37E-11    | -0.461492939 | 2.52E-14    | 0.020824236  | 0.745696461 |
| -0.386202897 | 3.88E-10    | -0.442031416 | 3.84E-13    | 0.436002523  | 8.64E-13    |
| 0.631002306  | 1.30E-28    | 0.643660903  | 4.68E-30    | -0.335602165 | 7.32E-08    |
| 0.459273923  | 3.46E-14    | 0.393755741  | 1.64E-10    | -0.442890936 | 3.42E-13    |
| 0.449461708  | 1.39E-13    | 0.342956342  | 3.62E-08    | -0.372468763 | 1.76E-09    |
| 0.633305021  | 7.16E-29    | 0.349602424  | 1.88E-08    | -0.633877453 | 6.18E-29    |
| -0.49902916  | 7.83E-17    | -0.258198611 | 4.31E-05    | 0.118038712  | 0.065095289 |
| -0.170413011 | 0.007510304 | -0.307427312 | 9.26E-07    | 0.266474583  | 2.38E-05    |
| -0.100922202 | 0.115111292 | -0.173196654 | 0.006574512 | 0.416722133  | 1.04E-11    |
| 0.413492813  | 1.55E-11    | 0.318565552  | 3.50E-07    | -0.394494487 | 1.50E-10    |
| 0.242523219  | 0.000126039 | 0.227740273  | 0.000325878 | -0.258041364 | 4.36E-05    |
| 0.439719775  | 5.25E-13    | 0.354069751  | 1.20E-08    | -0.376053824 | 1.20E-09    |
| 0.512746482  | 7.90E-18    | 0.294465343  | 2.73E-06    | -0.242860191 | 0.000123253 |
| -0.559004014 | 1.54E-21    | -0.503370861 | 3.83E-17    | 0.539098188  | 7.15E-20    |
| 0.112907928  | 0.077749625 | 0.439177227  | 5.65E-13    | -0.177290492 | 0.005387158 |
| 0.273403374  | 1.42E-05    | 0.237575481  | 0.000174376 | -0.418239804 | 8.58E-12    |
| 0.632530485  | 8.75E-29    | 0.419802972  | 7.04E-12    | -0.424110224 | 4.08E-12    |
| 0.47530135   | 3.27E-15    | 0.329502707  | 1.30E-07    | -0.474143245 | 3.89E-15    |
| 0.355032955  | 1.09E-08    | 0.39180535   | 2.05E-10    | -0.24473397  | 0.000108782 |
| 0.354025134  | 1.21E-08    | 0.407261301  | 3.32E-11    | -0.315650559 | 4.53E-07    |
| 0.343262481  | 3.51E-08    | 0.343856906  | 3.31E-08    | -0.335285363 | 7.55E-08    |
| -0.404305984 | 4.73E-11    | -0.29497991  | 2.62E-06    | 0.537485347  | 9.65E-20    |
| -0.43370077  | 1.17E-12    | -0.596046511 | 5.88E-25    | 0.229107806  | 0.000299213 |
| -0.542968633 | 3.46E-20    | -0.626865119 | 3.71E-28    | 0.202085103  | 0.001473629 |
| -0.423078664 | 4.65E-12    | -0.548578176 | 1.19E-20    | 0.266726214  | 2.33E-05    |
| 0.344532666  | 3.10E-08    | 0.305620149  | 1.08E-06    | -0.320680642 | 2.90E-07    |
| 0.783930767  | 3.23E-52    | 0.484977047  | 7.38E-16    | -0.493767372 | 1.84E-16    |
| -0.380790078 | 7.11E-10    | -0.421076917 | 6.00E-12    | 0.358428691  | 7.71E-09    |
| -0.076729925 | 0.231448396 | -0.165817971 | 0.009316572 | 0.069407884  | 0.279183716 |
| 0.573672776  | 7.68E-23    | 0.542309242  | 3.91E-20    | -0.070535186 | 0.2714304   |

|              |            |              |             |              |             |
|--------------|------------|--------------|-------------|--------------|-------------|
| -0.480824228 | 1.41E-15   | -0.487632206 | 4.87E-16    | 0.392274254  | 1.94E-10    |
| -0.375673584 | 1.25E-09   | -0.328547053 | 1.42E-07    | 0.451615056  | 1.03E-13    |
| -0.614449118 | 7.97E-27   | -0.472283832 | 5.14E-15    | 0.317465458  | 3.86E-07    |
| 0.540238681  | 5.77E-20   | 0.477683607  | 2.27E-15    | -0.450697246 | 1.17E-13    |
| -0.420127237 | 6.76E-12   | -0.414148661 | 1.43E-11    | 0.338702721  | 5.45E-08    |
| 0.51209333   | 8.83E-18   | 0.607208654  | 4.48E-26    | -0.247454118 | 9.06E-05    |
| -0.344801308 | 3.02E-08   | -0.449739935 | 1.33E-13    | 0.349105868  | 1.98E-08    |
| 0.406597518  | 3.59E-11   | 0.415755735  | 1.17E-11    | -0.54839831  | 1.23E-20    |
| 0.266118255  | 2.44E-05   | 0.56725601   | 2.90E-22    | 0.099981926  | 0.118553269 |
| 0.467273689  | 1.08E-14   | 0.416082184  | 1.12E-11    | -0.591760755 | 1.54E-24    |
| -0.431031158 | 1.66E-12   | -0.551423262 | 6.84E-21    | 0.379794513  | 7.94E-10    |
| 0.253847672  | 5.84E-05   | 0.555564872  | 3.04E-21    | 0.064058661  | 0.318000669 |
| 0.37587358   | 1.22E-09   | 0.349164482  | 1.96E-08    | -0.038963175 | 0.543863002 |
| -0.444009614 | 2.94E-13   | -0.356884025 | 9.03E-09    | 0.048054197  | 0.454005957 |
| -0.402488311 | 5.88E-11   | -0.429530184 | 2.03E-12    | 0.498431451  | 8.63E-17    |
| -0.570748455 | 1.41E-22   | -0.530529364 | 3.45E-19    | 0.428760338  | 2.24E-12    |
| -0.462268056 | 2.25E-14   | -0.422270551 | 5.15E-12    | 0.186414948  | 0.003404397 |
| -0.169424838 | 0.00787001 | -0.198100097 | 0.001834238 | 0.128193719  | 0.045009496 |
| -0.635051816 | 4.55E-29   | -0.660812896 | 4.02E-32    | 0.325825718  | 1.82E-07    |
| -0.27178201  | 1.60E-05   | -0.396840883 | 1.15E-10    | 0.364147507  | 4.27E-09    |
| -0.573621859 | 7.76E-23   | -0.47069255  | 6.52E-15    | 0.444802832  | 2.63E-13    |
| -0.359603727 | 6.84E-09   | -0.340689974 | 4.50E-08    | 0.395446892  | 1.35E-10    |
| -0.263626972 | 2.92E-05   | -0.444384697 | 2.79E-13    | 0.226557338  | 0.00035071  |
| -0.64467606  | 3.56E-30   | -0.594400145 | 8.53E-25    | 0.434024639  | 1.12E-12    |
| -0.581468375 | 1.47E-23   | -0.53872481  | 7.66E-20    | 0.489393596  | 3.69E-16    |
| 0.361865791  | 5.41E-09   | 0.642491198  | 6.40E-30    | 0.025561376  | 0.690543388 |
| 0.62783662   | 2.90E-28   | 0.289828713  | 3.97E-06    | -0.310753133 | 6.96E-07    |
| 0.450490742  | 1.20E-13   | 0.350714524  | 1.68E-08    | -0.410984751 | 2.11E-11    |
| -0.505570084 | 2.66E-17   | -0.471062963 | 6.17E-15    | 0.204167964  | 0.001312167 |
| -0.355263689 | 1.07E-08   | -0.414618502 | 1.35E-11    | 0.284715521  | 5.96E-06    |
| -0.444498249 | 2.75E-13   | -0.491624826 | 2.59E-16    | 0.614439931  | 7.98E-27    |
| -0.482721074 | 1.05E-15   | -0.515145271 | 5.24E-18    | 0.307663792  | 9.08E-07    |
| -0.681510241 | 8.35E-35   | -0.585786196 | 5.76E-24    | 0.455086841  | 6.29E-14    |
| 0.52282663   | 1.37E-18   | 0.459805344  | 3.21E-14    | -0.204799218 | 0.001266538 |
| -0.456066085 | 5.48E-14   | -0.522082999 | 1.56E-18    | 0.26219198   | 3.24E-05    |
| -0.501362087 | 5.34E-17   | -0.416456623 | 1.07E-11    | 0.296291402  | 2.35E-06    |
| -0.364308365 | 4.19E-09   | -0.390554464 | 2.37E-10    | 0.188528195  | 0.003051988 |
| 0.671604473  | 1.71E-33   | 0.432146482  | 1.44E-12    | -0.530751504 | 3.32E-19    |
| 0.474810099  | 3.52E-15   | 0.740368514  | 8.32E-44    | -0.426452023 | 3.02E-12    |
| -0.555301028 | 3.20E-21   | -0.51500305  | 5.37E-18    | 0.368391882  | 2.73E-09    |

|              |             |              |             |              |             |
|--------------|-------------|--------------|-------------|--------------|-------------|
| 0.415539453  | 1.20E-11    | 0.350362468  | 1.74E-08    | -0.249409516 | 7.93E-05    |
| -0.040811036 | 0.524912079 | -0.395592606 | 1.32E-10    | 0.294125857  | 2.81E-06    |
| -0.392511063 | 1.89E-10    | -0.307732866 | 9.02E-07    | 0.32533909   | 1.90E-07    |
| -0.33488671  | 7.84E-08    | -0.391576919 | 2.11E-10    | 0.269599116  | 1.89E-05    |
| 0.449583382  | 1.36E-13    | 0.48967522   | 3.53E-16    | -0.042239264 | 0.5104985   |
| -0.183054096 | 0.004041188 | -0.253675609 | 5.91E-05    | 0.320545124  | 2.93E-07    |
| -0.483752736 | 8.93E-16    | -0.460923721 | 2.73E-14    | 0.175472653  | 0.005888345 |
| -0.50284524  | 4.18E-17    | -0.440202869 | 4.92E-13    | 0.499444858  | 7.31E-17    |
| 0.367538996  | 2.99E-09    | 0.331087088  | 1.12E-07    | -0.150170626 | 0.018679124 |
| 0.488424847  | 4.30E-16    | 0.405328999  | 4.19E-11    | -0.384573847 | 4.66E-10    |
| -0.567510419 | 2.76E-22    | -0.283829697 | 6.39E-06    | 0.23617773   | 0.00019089  |
| 0.474269336  | 3.82E-15    | 0.550804751  | 7.71E-21    | -0.075805665 | 0.237134263 |
| -0.279406941 | 9.00E-06    | -0.411092342 | 2.08E-11    | 0.3083375    | 8.57E-07    |
| 0.462939064  | 2.04E-14    | 0.391122631  | 2.22E-10    | 0.063404791  | 0.322975684 |
| 0.301752054  | 1.50E-06    | 0.142254531  | 0.025975087 | -0.350128378 | 1.79E-08    |
| 0.492078307  | 2.41E-16    | 0.755027864  | 1.94E-46    | -0.377359811 | 1.04E-09    |
| -0.220392943 | 0.000511085 | -0.303752636 | 1.27E-06    | 0.169638026  | 0.007791135 |
| 0.429434551  | 2.05E-12    | 0.347829479  | 2.24E-08    | -0.301366934 | 1.55E-06    |
| 0.307531571  | 9.18E-07    | 0.307564998  | 9.15E-07    | 0.336298267  | 6.85E-08    |
| 0.531625546  | 2.83E-19    | 0.450548004  | 1.19E-13    | -0.407505106 | 3.22E-11    |
| 0.569909207  | 1.68E-22    | 0.46425717   | 1.68E-14    | -0.386672743 | 3.68E-10    |
| -0.263735104 | 2.90E-05    | -0.405209941 | 4.25E-11    | 0.08363653   | 0.191991295 |
| -0.303057659 | 1.34E-06    | -0.406235213 | 3.75E-11    | 0.316400125  | 4.24E-07    |
| 0.008948152  | 0.889175763 | -0.196380471 | 0.002013404 | -0.060402609 | 0.346461378 |
| -0.655305206 | 1.91E-31    | -0.607258165 | 4.42E-26    | 0.478066614  | 2.15E-15    |
| -0.567012995 | 3.05E-22    | -0.545488629 | 2.14E-20    | 0.41140038   | 2.00E-11    |
| 0.422370139  | 5.09E-12    | 0.443489918  | 3.15E-13    | -0.192446671 | 0.002484767 |
| -0.509610502 | 1.35E-17    | -0.352382028 | 1.42E-08    | 0.567794977  | 2.60E-22    |
| 0.425306218  | 3.50E-12    | 0.45846009   | 3.89E-14    | -0.256347434 | 4.91E-05    |
| 0.231903414  | 0.000250902 | 0.177483211  | 0.005336335 | -0.293506473 | 2.95E-06    |
| -0.360567832 | 6.19E-09    | -0.171100456 | 0.007268783 | 0.324885168  | 1.98E-07    |
| -0.416343271 | 1.09E-11    | -0.470387414 | 6.82E-15    | 0.114387422  | 0.073911569 |
| -0.12972966  | 0.042479987 | -0.273151587 | 1.45E-05    | 0.158797299  | 0.012822161 |
| -0.379297726 | 8.39E-10    | -0.264907044 | 2.66E-05    | 0.548581669  | 1.19E-20    |
| -0.269791232 | 1.86E-05    | -0.341769753 | 4.06E-08    | 0.339253969  | 5.17E-08    |
| -0.215922728 | 0.000667312 | -0.265815574 | 2.49E-05    | 0.124479178  | 0.051652526 |
| -0.097492574 | 0.128053293 | -0.064515988 | 0.314550885 | 0.347524198  | 2.31E-08    |
| -0.126635329 | 0.047703776 | -0.296779474 | 2.26E-06    | -0.151980112 | 0.017287082 |
| -0.166755148 | 0.008919654 | -0.280995333 | 7.97E-06    | 0.253393563  | 6.03E-05    |
| -0.630963953 | 1.31E-28    | -0.606281357 | 5.56E-26    | 0.454198679  | 7.13E-14    |



|              |             |              |             |              |             |
|--------------|-------------|--------------|-------------|--------------|-------------|
| 0.612044851  | 1.42E-26    | 0.401534147  | 6.59E-11    | -0.10748805  | 0.093207236 |
| 0.462693804  | 2.11E-14    | 0.338860611  | 5.37E-08    | -0.259386602 | 3.96E-05    |
| 0.378565168  | 9.09E-10    | 0.178909053  | 0.004973494 | -0.19715305  | 0.001931023 |
| -0.333044845 | 9.32E-08    | -0.335012106 | 7.74E-08    | 0.057684595  | 0.368632375 |
| 0.521247494  | 1.81E-18    | 0.236784851  | 0.000183545 | -0.158146769 | 0.013199337 |
| 0.583407168  | 9.66E-24    | 0.474878675  | 3.48E-15    | 0.003172088  | 0.960602734 |
| 0.616300991  | 5.09E-27    | 0.436147805  | 8.47E-13    | -0.276542355 | 1.12E-05    |
| 0.631012404  | 1.29E-28    | 0.373585685  | 1.56E-09    | -0.399687309 | 8.20E-11    |
| 0.624539135  | 6.66E-28    | 0.403469776  | 5.23E-11    | -0.309174713 | 7.97E-07    |
| 0.589726323  | 2.42E-24    | 0.303357631  | 1.31E-06    | -0.235258132 | 0.000202539 |
| 0.576029708  | 4.68E-23    | 0.287808817  | 4.67E-06    | -0.271682248 | 1.62E-05    |
| 0.629339916  | 1.98E-28    | 0.290574691  | 3.74E-06    | -0.311968308 | 6.26E-07    |
| 0.483969232  | 8.64E-16    | 0.269762201  | 1.86E-05    | -0.218133128 | 0.000585248 |
| 0.62444311   | 6.83E-28    | 0.435875561  | 8.79E-13    | -0.133205342 | 0.037194302 |
| -0.402515463 | 5.86E-11    | -0.388043383 | 3.15E-10    | 0.389796617  | 2.58E-10    |
| 0.513077356  | 7.47E-18    | 0.394261872  | 1.55E-10    | -0.443355851 | 3.21E-13    |
| -0.280865514 | 8.05E-06    | -0.407577106 | 3.19E-11    | 0.345398873  | 2.85E-08    |
| 0.371604153  | 1.94E-09    | 0.30862891   | 8.35E-07    | -0.304092312 | 1.23E-06    |
| 0.378143842  | 9.52E-10    | 0.259263221  | 3.99E-05    | -0.233038229 | 0.000233451 |
| 0.639376572  | 1.47E-29    | 0.614171     | 8.52E-27    | -0.33889636  | 5.35E-08    |
| 0.455469222  | 5.96E-14    | 0.733578112  | 1.20E-42    | -0.457606563 | 4.40E-14    |
| -0.553177302 | 4.86E-21    | -0.524672251 | 9.88E-19    | 0.552471239  | 5.58E-21    |
| 0.696221883  | 7.53E-37    | 0.499782     | 6.92E-17    | -0.535627937 | 1.36E-19    |
| -0.546344256 | 1.82E-20    | -0.558236617 | 1.79E-21    | 0.403657099  | 5.12E-11    |
| -0.579730536 | 2.13E-23    | -0.556543845 | 2.51E-21    | 0.425702488  | 3.32E-12    |
| -0.642789716 | 5.91E-30    | -0.541310669 | 4.72E-20    | 0.609674441  | 2.50E-26    |
| -0.601237433 | 1.80E-25    | -0.53304573  | 2.18E-19    | 0.422754422  | 4.85E-12    |
| -0.34784827  | 2.24E-08    | -0.365408888 | 3.74E-09    | -0.017353116 | 0.786967536 |
| 0.530598848  | 3.41E-19    | 0.317987105  | 3.69E-07    | -0.322509269 | 2.46E-07    |
| -0.32152537  | 2.69E-07    | -0.377686007 | 1.00E-09    | 0.343292389  | 3.50E-08    |
| -0.557640398 | 2.02E-21    | -0.571775916 | 1.14E-22    | 0.359262475  | 7.08E-09    |
| 0.307978073  | 8.83E-07    | 0.333037267  | 9.33E-08    | -0.308623942 | 8.36E-07    |
| -0.152884608 | 0.016625791 | -0.19273666  | 0.002446864 | 0.287566382  | 4.76E-06    |
| 0.326694632  | 1.68E-07    | 0.441997622  | 3.86E-13    | -0.26383188  | 2.88E-05    |
| -0.408723145 | 2.78E-11    | -0.558384279 | 1.74E-21    | 0.32651763   | 1.71E-07    |
| -0.647891054 | 1.49E-30    | -0.458359676 | 3.95E-14    | 0.377005992  | 1.08E-09    |
| 0.405650974  | 4.03E-11    | 0.720818745  | 1.47E-40    | -0.477507752 | 2.34E-15    |
| -0.468512488 | 9.01E-15    | -0.464837229 | 1.55E-14    | 0.287404387  | 4.82E-06    |
| -0.541638476 | 4.44E-20    | -0.552997892 | 5.03E-21    | 0.415660523  | 1.18E-11    |
| -0.413417291 | 1.56E-11    | -0.464096423 | 1.72E-14    | 0.365352084  | 3.76E-09    |

|              |             |              |             |              |             |
|--------------|-------------|--------------|-------------|--------------|-------------|
| -0.255581761 | 5.18E-05    | -0.206386605 | 0.001158153 | 0.340915247  | 4.41E-08    |
| -0.712064413 | 3.40E-39    | -0.536145412 | 1.24E-19    | 0.489826216  | 3.44E-16    |
| -0.623504462 | 8.63E-28    | -0.563736323 | 5.95E-22    | 0.61305616   | 1.11E-26    |
| -0.194565748 | 0.002219666 | -0.42168398  | 5.55E-12    | 0.292541103  | 3.19E-06    |
| -0.241018379 | 0.000139219 | -0.418862066 | 7.93E-12    | 0.201338566  | 0.001535795 |
| -0.323441546 | 2.26E-07    | -0.452616099 | 8.92E-14    | 0.298831382  | 1.91E-06    |
| -0.042280279 | 0.510087644 | -0.079391051 | 0.215617118 | 0.020018005  | 0.755222785 |
| -0.422006538 | 5.33E-12    | -0.342103141 | 3.93E-08    | 0.387692493  | 3.28E-10    |
| -0.509263763 | 1.43E-17    | -0.515311787 | 5.09E-18    | 0.392288657  | 1.94E-10    |
| -0.278917257 | 9.35E-06    | -0.425293575 | 3.50E-12    | 0.192735389  | 0.002447028 |
| -0.400474415 | 7.47E-11    | -0.477663088 | 2.28E-15    | 0.252857462  | 6.26E-05    |
| -0.220627143 | 0.000503919 | -0.299883412 | 1.75E-06    | 0.269584792  | 1.89E-05    |
| -0.322185927 | 2.53E-07    | -0.296075767 | 2.40E-06    | 0.315004591  | 4.80E-07    |
| -0.632396183 | 9.06E-29    | -0.584262934 | 8.02E-24    | 0.42960241   | 2.01E-12    |
| 0.621161198  | 1.54E-27    | 0.589389972  | 2.61E-24    | -0.327874671 | 1.51E-07    |
| -0.47545632  | 3.19E-15    | -0.540562963 | 5.43E-20    | 0.246097034  | 9.93E-05    |
| -0.309367057 | 7.84E-07    | -0.294101146 | 2.82E-06    | 0.455694824  | 5.77E-14    |
| -0.456931567 | 4.84E-14    | -0.412096562 | 1.84E-11    | 0.200091293  | 0.001645037 |
| -0.560075579 | 1.24E-21    | -0.507647711 | 1.88E-17    | 0.496816441  | 1.12E-16    |
| 0.632048523  | 9.91E-29    | 0.34397116   | 3.28E-08    | -0.342327544 | 3.84E-08    |
| -0.459849187 | 3.19E-14    | -0.465628844 | 1.38E-14    | 0.467834988  | 9.96E-15    |
| -0.539952625 | 6.09E-20    | -0.511895467 | 9.14E-18    | 0.471810702  | 5.52E-15    |
| 0.349791566  | 1.85E-08    | 0.477328035  | 2.40E-15    | -0.020505365 | 0.749459681 |
| 0.329124687  | 1.34E-07    | 0.39389758   | 1.61E-10    | -0.425887492 | 3.25E-12    |
| -0.418195136 | 8.62E-12    | -0.517802482 | 3.31E-18    | 0.2838227    | 6.39E-06    |
| 0.414562966  | 1.36E-11    | 0.435459496  | 9.29E-13    | -0.220244002 | 0.000515692 |
| -0.512233719 | 8.63E-18    | -0.470607958 | 6.60E-15    | 0.412693395  | 1.71E-11    |
| 0.386388599  | 3.80E-10    | 0.415361617  | 1.23E-11    | -0.443713028 | 3.06E-13    |
| 0.655479633  | 1.82E-31    | 0.396796277  | 1.15E-10    | -0.300141788 | 1.71E-06    |
| 0.572552839  | 9.71E-23    | 0.277046066  | 1.08E-05    | -0.220469344 | 0.000508737 |
| 0.585417428  | 6.24E-24    | 0.53079495   | 3.29E-19    | -0.50192445  | 4.86E-17    |
| 0.561316222  | 9.69E-22    | 0.501993317  | 4.81E-17    | -0.345095428 | 2.94E-08    |
| 0.503761291  | 3.59E-17    | 0.31908894   | 3.34E-07    | -0.371915517 | 1.87E-09    |
| -0.40042973  | 7.51E-11    | -0.426766292 | 2.90E-12    | 0.399267637  | 8.61E-11    |
| -0.35160414  | 1.54E-08    | -0.356969225 | 8.96E-09    | 0.239079591  | 0.000158103 |
| 0.605564212  | 6.58E-26    | 0.486982124  | 5.39E-16    | -0.242511657 | 0.000126136 |
| 0.630573193  | 1.45E-28    | 0.506933533  | 2.11E-17    | -0.641835347 | 7.63E-30    |
| -0.501123084 | 5.55E-17    | -0.537798255 | 9.10E-20    | 0.242376012  | 0.000127275 |
| -0.441803539 | 3.96E-13    | -0.433931551 | 1.14E-12    | 0.18761615   | 0.003199814 |
| -0.382818174 | 5.68E-10    | -0.394458486 | 1.51E-10    | 0.190812674  | 0.002708495 |

|              |             |              |             |              |             |
|--------------|-------------|--------------|-------------|--------------|-------------|
| -0.551873195 | 6.27E-21    | -0.412811126 | 1.68E-11    | 0.666319314  | 8.15E-33    |
| 0.386471666  | 3.77E-10    | 0.450290911  | 1.23E-13    | -0.13944718  | 0.029094469 |
| 0.481799274  | 1.21E-15    | 0.439779699  | 5.21E-13    | 0.240508757  | 0.000143967 |
| -0.002421347 | 0.969921842 | -0.280353392 | 8.37E-06    | -0.037540507 | 0.55868016  |
| -0.693119292 | 2.08E-36    | -0.621145045 | 1.55E-27    | 0.40214014   | 6.13E-11    |
| -0.461489515 | 2.52E-14    | -0.378458205 | 9.20E-10    | 0.49825668   | 8.88E-17    |
| -0.196602728 | 0.001989382 | -0.42837633  | 2.35E-12    | 0.371750242  | 1.91E-09    |
| 0.436940031  | 7.62E-13    | 0.420419443  | 6.52E-12    | -0.36209669  | 5.28E-09    |
| 0.454444914  | 6.89E-14    | 0.221727547  | 0.000471478 | -0.173985716 | 0.006328931 |
| 0.404696666  | 4.52E-11    | 0.488844799  | 4.02E-16    | -0.169646809 | 0.007787901 |
| -0.456854854 | 4.90E-14    | -0.321936507 | 2.59E-07    | 0.08445872   | 0.187643373 |
| 0.603673848  | 1.02E-25    | 0.342982244  | 3.61E-08    | -0.173580414 | 0.00645403  |
| -0.497459299 | 1.01E-16    | -0.491658084 | 2.57E-16    | 0.420572036  | 6.39E-12    |
| -0.387525577 | 3.34E-10    | -0.335927738 | 7.10E-08    | 0.368673025  | 2.65E-09    |
| -0.441599718 | 4.08E-13    | -0.329285777 | 1.32E-07    | 0.505537682  | 2.67E-17    |
| -0.218516661 | 0.000571998 | -0.036711646 | 0.567401719 | 0.346487751  | 2.56E-08    |
| 0.590756659  | 1.93E-24    | 0.404947409  | 4.38E-11    | -0.106879292 | 0.095086772 |
| -0.092346926 | 0.149543129 | -0.289611361 | 4.04E-06    | 0.0180849    | 0.778212781 |
| -0.648963656 | 1.11E-30    | -0.569024328 | 2.02E-22    | 0.294904572  | 2.64E-06    |
| -0.606382209 | 5.43E-26    | -0.716795182 | 6.31E-40    | 0.264514369  | 2.74E-05    |
| -0.621950707 | 1.27E-27    | -0.542506174 | 3.77E-20    | 0.040298406  | 0.530135548 |
| -0.599897339 | 2.45E-25    | -0.545814491 | 2.01E-20    | 0.467561221  | 1.04E-14    |
| 0.368220254  | 2.78E-09    | 0.387202719  | 3.47E-10    | -0.165675494 | 0.009378267 |
| -0.516571192 | 4.09E-18    | -0.432152564 | 1.44E-12    | 0.575972036  | 4.74E-23    |
| -0.377397209 | 1.03E-09    | -0.413752663 | 1.50E-11    | 0.272681374  | 1.50E-05    |
| -0.483152457 | 9.81E-16    | -0.358507783 | 7.65E-09    | 0.309479223  | 7.76E-07    |
| -0.195692761 | 0.00208942  | -0.242718174 | 0.00012442  | 0.098040785  | 0.125912234 |
| -0.572578587 | 9.65E-23    | -0.596593978 | 5.20E-25    | 0.401062631  | 6.97E-11    |
| -0.52232561  | 1.50E-18    | -0.560059086 | 1.25E-21    | 0.198190967  | 0.001825188 |
| -0.124236815 | 0.052112913 | -0.287454841 | 4.80E-06    | 0.100488054  | 0.116690703 |
| 0.61344355   | 1.02E-26    | 0.456938568  | 4.84E-14    | -0.274801773 | 1.28E-05    |
| 0.431472509  | 1.57E-12    | 0.341825065  | 4.04E-08    | -0.350164165 | 1.78E-08    |
| -0.283037934 | 6.80E-06    | -0.329146785 | 1.34E-07    | 0.297481515  | 2.13E-06    |
| -0.197898429 | 0.001854468 | -0.225282019 | 0.000379444 | 0.186006935  | 0.003476535 |
| -0.311035238 | 6.79E-07    | -0.422897852 | 4.76E-12    | 0.196783941  | 0.00196999  |
| -0.429502504 | 2.03E-12    | -0.425000659 | 3.64E-12    | 0.213449427  | 0.000771665 |
| -0.396751223 | 1.16E-10    | -0.481373552 | 1.29E-15    | 0.58789613   | 3.62E-24    |
| -0.578857227 | 2.57E-23    | -0.572890406 | 9.05E-23    | 0.254767615  | 5.48E-05    |
| -0.162989774 | 0.010610963 | -0.306979374 | 9.62E-07    | 0.019676746  | 0.759266321 |
| 0.531467266  | 2.91E-19    | 0.651023546  | 6.30E-31    | -0.134424969 | 0.035476543 |

|              |             |              |             |              |             |
|--------------|-------------|--------------|-------------|--------------|-------------|
| -0.467446823 | 1.06E-14    | -0.458226853 | 4.02E-14    | 0.425050542  | 3.61E-12    |
| -0.521702373 | 1.67E-18    | -0.4970415   | 1.08E-16    | 0.413040523  | 1.64E-11    |
| -0.487884929 | 4.68E-16    | -0.462219432 | 2.27E-14    | 0.34458668   | 3.08E-08    |
| -0.467804518 | 1.00E-14    | -0.480247274 | 1.54E-15    | 0.251839586  | 6.71E-05    |
| -0.296950708 | 2.23E-06    | -0.212560877 | 0.000812692 | 0.239727441  | 0.000151541 |
| -0.461616466 | 2.47E-14    | -0.444297254 | 2.82E-13    | 0.262112139  | 3.26E-05    |
| -0.322799152 | 2.40E-07    | -0.292531264 | 3.20E-06    | 0.232019923  | 0.000249056 |
| 0.329862239  | 1.25E-07    | 0.273973848  | 1.36E-05    | -0.153057728 | 0.016501769 |
| -0.416039849 | 1.13E-11    | -0.512327578 | 8.49E-18    | 0.1959389    | 0.002061917 |
| -0.536624359 | 1.13E-19    | -0.545710608 | 2.05E-20    | 0.280499082  | 8.28E-06    |
| -0.36562326  | 3.65E-09    | -0.46620868  | 1.27E-14    | 0.305003881  | 1.14E-06    |
| 0.513981998  | 6.40E-18    | 0.684477425  | 3.30E-35    | -0.090541215 | 0.157699819 |
| -0.378022174 | 9.65E-10    | -0.430470289 | 1.79E-12    | 0.264357666  | 2.77E-05    |
| -0.647722099 | 1.56E-30    | -0.565484643 | 4.17E-22    | 0.529985617  | 3.81E-19    |
| -0.438616484 | 6.09E-13    | -0.522968596 | 1.34E-18    | 0.245732184  | 0.00010174  |
| -0.111363825 | 0.081925712 | -0.187660024 | 0.003192557 | -0.124209574 | 0.052164873 |
| 0.534800979  | 1.58E-19    | 0.465162798  | 1.48E-14    | -0.566831831 | 3.17E-22    |
| 0.536535493  | 1.15E-19    | 0.412537168  | 1.74E-11    | -0.421684549 | 5.55E-12    |
| 0.560414001  | 1.16E-21    | 0.521603629  | 1.70E-18    | -0.42490685  | 3.68E-12    |
| 0.648122218  | 1.40E-30    | 0.437504217  | 7.07E-13    | -0.273881744 | 1.37E-05    |
| 0.42068542   | 6.30E-12    | 0.368360959  | 2.74E-09    | -0.00644568  | 0.920045882 |
| 0.470574669  | 6.64E-15    | 0.098017266  | 0.126003513 | -0.526612726 | 6.99E-19    |
| 0.574981019  | 5.84E-23    | 0.39441266   | 1.52E-10    | 0.038966553  | 0.543828049 |
| 0.459381476  | 3.41E-14    | 0.487603605  | 4.89E-16    | -0.217079462 | 0.000623127 |
| -0.435408121 | 9.35E-13    | -0.454025754 | 7.31E-14    | 0.228661746  | 0.000307679 |
| -0.578391774 | 2.84E-23    | -0.550719946 | 7.84E-21    | 0.368200689  | 2.78E-09    |
| -0.558151102 | 1.82E-21    | -0.507798791 | 1.83E-17    | 0.317071018  | 4.00E-07    |
| -0.423279554 | 4.53E-12    | -0.312519376 | 5.97E-07    | 0.300552775  | 1.65E-06    |
| -0.507823932 | 1.82E-17    | -0.410906644 | 2.13E-11    | 0.374857578  | 1.36E-09    |
| -0.456167317 | 5.40E-14    | -0.489057508 | 3.89E-16    | 0.10282398   | 0.108388818 |
| 0.404870086  | 4.42E-11    | 0.276094783  | 1.16E-05    | -0.354543862 | 1.15E-08    |
| -0.616351888 | 5.02E-27    | -0.424097396 | 4.08E-12    | 0.283196923  | 6.71E-06    |
| -0.296944089 | 2.23E-06    | -0.276894181 | 1.09E-05    | 0.199524171  | 0.001697019 |
| 0.548361288  | 1.24E-20    | 0.375241757  | 1.31E-09    | -0.365890361 | 3.55E-09    |
| 0.602981907  | 1.20E-25    | 0.577448222  | 3.46E-23    | -0.401558987 | 6.57E-11    |
| 0.780053526  | 2.16E-51    | 0.629219358  | 2.04E-28    | -0.349368375 | 1.93E-08    |
| -0.361507198 | 5.62E-09    | -0.350919808 | 1.65E-08    | 0.361106619  | 5.85E-09    |
| -0.448459288 | 1.59E-13    | -0.549893374 | 9.20E-21    | 0.353659169  | 1.25E-08    |
| -0.155866293 | 0.014599638 | -0.377335587 | 1.04E-09    | 0.334804733  | 7.90E-08    |
| 0.276901121  | 1.09E-05    | 0.186865127  | 0.003326378 | -0.341308427 | 4.24E-08    |

|              |             |              |            |              |             |
|--------------|-------------|--------------|------------|--------------|-------------|
| 0.396817185  | 1.15E-10    | 0.350199104  | 1.77E-08   | -0.025661623 | 0.689392505 |
| 0.465649282  | 1.37E-14    | 0.4756095    | 3.12E-15   | -0.482298488 | 1.12E-15    |
| -0.345957678 | 2.70E-08    | -0.591185174 | 1.75E-24   | 0.044895372  | 0.484250395 |
| -0.611101472 | 1.78E-26    | -0.559156077 | 1.49E-21   | 0.606749491  | 4.99E-26    |
| -0.368374707 | 2.73E-09    | -0.414766332 | 1.32E-11   | 0.545295217  | 2.22E-20    |
| -0.576293978 | 4.42E-23    | -0.414581412 | 1.35E-11   | 0.377961767  | 9.71E-10    |
| -0.646427574 | 2.22E-30    | -0.585690525 | 5.88E-24   | 0.313196523  | 5.62E-07    |
| 0.525474669  | 8.57E-19    | 0.628419892  | 2.50E-28   | -0.359755806 | 6.73E-09    |
| 0.429382963  | 2.06E-12    | 0.432711132  | 1.34E-12   | -0.257365484 | 4.57E-05    |
| 0.530315854  | 3.59E-19    | 0.576945959  | 3.85E-23   | -0.387591684 | 3.32E-10    |
| 0.417223723  | 9.74E-12    | 0.30301623   | 1.35E-06   | -0.032240275 | 0.615533919 |
| 0.301952393  | 1.47E-06    | 0.492023674  | 2.43E-16   | -0.364209251 | 4.24E-09    |
| -0.190139984 | 0.002805802 | -0.348943477 | 2.01E-08   | 0.383061282  | 5.52E-10    |
| 0.396506896  | 1.19E-10    | 0.374157475  | 1.47E-09   | -0.266608288 | 2.35E-05    |
| 0.344473433  | 3.12E-08    | 0.395575223  | 1.33E-10   | -0.256333378 | 4.91E-05    |
| -0.3755979   | 1.26E-09    | -0.38299864  | 5.56E-10   | 0.37159773   | 1.94E-09    |
| 0.228629065  | 0.000308308 | 0.178831396  | 0.00499267 | -0.140483066 | 0.027908029 |
| -0.47008719  | 7.14E-15    | -0.367268992 | 3.07E-09   | 0.414374606  | 1.39E-11    |
| -0.659667837 | 5.57E-32    | -0.571976702 | 1.09E-22   | 0.370938118  | 2.08E-09    |
| -0.432711244 | 1.34E-12    | -0.349566972 | 1.89E-08   | 0.320914591  | 2.84E-07    |
| -0.184641666 | 0.003728084 | -0.378556384 | 9.10E-10   | 0.220093066  | 0.000520399 |
| 0.491305627  | 2.72E-16    | 0.395276788  | 1.37E-10   | -0.383661094 | 5.17E-10    |
| 0.344935527  | 2.98E-08    | 0.310885466  | 6.88E-07   | -0.207757457 | 0.00107148  |
| 0.485118185  | 7.22E-16    | 0.381727199  | 6.41E-10   | -0.065380692 | 0.308095184 |
| 0.366795894  | 3.23E-09    | 0.353376315  | 1.29E-08   | -0.144496269 | 0.023694812 |
| 0.649910167  | 8.56E-31    | 0.420118235  | 6.77E-12   | -0.389702875 | 2.61E-10    |
| 0.548067102  | 1.31E-20    | 0.41714933   | 9.83E-12   | -0.523242398 | 1.27E-18    |
| 0.509464821  | 1.38E-17    | 0.427643699  | 2.59E-12   | -0.314958395 | 4.82E-07    |
| -0.641564683 | 8.20E-30    | -0.597790488 | 3.96E-25   | 0.398725344  | 9.18E-11    |
| 0.607820841  | 3.87E-26    | 0.409065233  | 2.66E-11   | -0.383253647 | 5.41E-10    |
| 0.349915374  | 1.82E-08    | 0.59187686   | 1.50E-24   | 0.293453733  | 2.97E-06    |
| 0.276734055  | 1.10E-05    | 0.319052407  | 3.35E-07   | -0.396675526 | 1.17E-10    |
| 0.708230093  | 1.30E-38    | 0.481645878  | 1.24E-15   | -0.228751766 | 0.000305953 |
| -0.541693673 | 4.40E-20    | -0.450870015 | 1.14E-13   | 0.259552962  | 3.91E-05    |
| 0.577247604  | 3.62E-23    | 0.457343072  | 4.57E-14   | -0.568858455 | 2.09E-22    |
| 0.507158608  | 2.04E-17    | 0.405195619  | 4.26E-11   | -0.330297616 | 1.20E-07    |
| 0.308788412  | 8.24E-07    | 0.339709606  | 4.95E-08   | -0.304923642 | 1.15E-06    |
| -0.316973679 | 4.03E-07    | -0.414601983 | 1.35E-11   | 0.045299873  | 0.480317851 |
| -0.503905542 | 3.50E-17    | -0.600764112 | 2.00E-25   | 0.386296063  | 3.84E-10    |
| -0.468059483 | 9.64E-15    | -0.474196734 | 3.86E-15   | 0.400918613  | 7.09E-11    |

|              |             |              |             |              |             |
|--------------|-------------|--------------|-------------|--------------|-------------|
| 0.395213125  | 1.38E-10    | 0.507274233  | 2.00E-17    | -0.347922926 | 2.22E-08    |
| 0.578620303  | 2.70E-23    | 0.532318836  | 2.49E-19    | -0.527707904 | 5.75E-19    |
| -0.320637851 | 2.91E-07    | -0.206143696 | 0.001174167 | 0.179198682  | 0.004902559 |
| 0.58071976   | 1.72E-23    | 0.408579307  | 2.83E-11    | -0.399434201 | 8.45E-11    |
| -0.44608428  | 2.21E-13    | -0.3136157   | 5.42E-07    | 0.524281266  | 1.06E-18    |
| 0.508731793  | 1.56E-17    | 0.463536774  | 1.87E-14    | -0.353606114 | 1.26E-08    |
| -0.434639526 | 1.04E-12    | -0.4335867   | 1.19E-12    | 0.281324669  | 7.77E-06    |
| -0.434560434 | 1.05E-12    | -0.353136757 | 1.32E-08    | 0.083058595  | 0.195091308 |
| 0.614103522  | 8.66E-27    | 0.584282616  | 7.99E-24    | -0.484133393 | 8.42E-16    |
| -0.325289525 | 1.91E-07    | -0.316622693 | 4.16E-07    | 0.130077473  | 0.041924082 |
| -0.572434901 | 9.95E-23    | -0.363680641 | 4.48E-09    | 0.171591703  | 0.00710046  |
| -0.323377469 | 2.27E-07    | -0.335320453 | 7.52E-08    | 0.176281475  | 0.005660407 |
| 0.453755018  | 7.60E-14    | 0.321829554  | 2.61E-07    | -0.02726093  | 0.671129893 |
| -0.521897771 | 1.61E-18    | -0.504475912 | 3.19E-17    | 0.245893433  | 0.000100643 |
| -0.356561554 | 9.34E-09    | -0.359222056 | 7.11E-09    | 0.310922197  | 6.85E-07    |
| 0.394673015  | 1.47E-10    | 0.27602344   | 1.17E-05    | -0.296563089 | 2.30E-06    |
| -0.545920034 | 1.97E-20    | -0.511130594 | 1.04E-17    | 0.202724821  | 0.001422201 |
| -0.534010903 | 1.83E-19    | -0.587953041 | 3.58E-24    | 0.192042826  | 0.002538441 |
| -0.626396798 | 4.18E-28    | -0.56024316  | 1.20E-21    | 0.433595508  | 1.19E-12    |
| -0.485786077 | 6.51E-16    | -0.447166596 | 1.90E-13    | 0.182331492  | 0.004191404 |
| -0.266575712 | 2.36E-05    | -0.487442259 | 5.02E-16    | 0.256599096  | 4.82E-05    |
| 0.033495676  | 0.601840615 | -0.156136067 | 0.014427466 | 0.149091596  | 0.019554795 |
| -0.372885129 | 1.69E-09    | -0.269701141 | 1.87E-05    | 0.205632178  | 0.001208555 |
| -0.061353672 | 0.338907096 | -0.346213434 | 2.63E-08    | 0.174465286  | 0.006183714 |
| -0.455405553 | 6.01E-14    | -0.46082352  | 2.77E-14    | 0.259085015  | 4.05E-05    |
| -0.494477128 | 1.64E-16    | -0.505144634 | 2.85E-17    | 0.32224096   | 2.52E-07    |
| 0.441632848  | 4.06E-13    | 0.65218625   | 4.57E-31    | 0.066334441  | 0.301076432 |
| -0.495246444 | 1.45E-16    | -0.404519123 | 4.61E-11    | 0.263293286  | 2.99E-05    |
| -0.596817892 | 4.94E-25    | -0.594049229 | 9.23E-25    | 0.441693754  | 4.02E-13    |
| -0.547493349 | 1.46E-20    | -0.541448163 | 4.60E-20    | 0.227390059  | 0.000333054 |
| 0.639698273  | 1.35E-29    | 0.505234052  | 2.81E-17    | -0.435680911 | 9.02E-13    |
| -0.300044259 | 1.73E-06    | -0.350902374 | 1.65E-08    | 0.147788987  | 0.0206592   |
| -0.295073978 | 2.60E-06    | -0.207604354 | 0.001080855 | 0.255490227  | 5.21E-05    |
| -0.275277369 | 1.23E-05    | -0.331123616 | 1.12E-07    | 0.394896985  | 1.44E-10    |
| -0.623059345 | 9.64E-28    | -0.503550063 | 3.72E-17    | 0.467720618  | 1.01E-14    |
| -0.347493947 | 2.32E-08    | -0.283452897 | 6.58E-06    | 0.144248644  | 0.023937907 |
| -0.415725406 | 1.17E-11    | -0.46227424  | 2.25E-14    | 0.265025459  | 2.64E-05    |
| -0.331428884 | 1.08E-07    | -0.412185529 | 1.82E-11    | 0.275117142  | 1.25E-05    |
| -0.241122035 | 0.000138271 | -0.242092963 | 0.000129683 | 0.351489279  | 1.56E-08    |
| -0.447368052 | 1.85E-13    | -0.198269404 | 0.001817409 | 0.612740671  | 1.20E-26    |

|              |             |              |             |              |             |
|--------------|-------------|--------------|-------------|--------------|-------------|
| -0.32878307  | 1.39E-07    | -0.322831367 | 2.39E-07    | 0.238372514  | 0.000165568 |
| -0.481646852 | 1.24E-15    | -0.379021248 | 8.64E-10    | 0.468054473  | 9.65E-15    |
| -0.276358038 | 1.14E-05    | -0.355959359 | 9.93E-09    | 0.333946987  | 8.56E-08    |
| -0.490518247 | 3.08E-16    | -0.511964887 | 9.03E-18    | 0.391866744  | 2.04E-10    |
| -0.195371051 | 0.00212587  | -0.319617147 | 3.19E-07    | 0.242273835  | 0.000128139 |
| -0.528133965 | 5.32E-19    | -0.54696474  | 1.62E-20    | 0.280390017  | 8.35E-06    |
| 0.65876444   | 7.20E-32    | 0.605998499  | 5.95E-26    | -0.490114515 | 3.29E-16    |
| -0.311719788 | 6.40E-07    | -0.335147687 | 7.64E-08    | 0.554043204  | 4.10E-21    |
| 0.369666     | 2.38E-09    | 0.540909343  | 5.09E-20    | 0.012449743  | 0.846269653 |
| 0.58600817   | 5.48E-24    | 0.498203113  | 8.95E-17    | -0.471926691 | 5.42E-15    |
| -0.44666053  | 2.04E-13    | -0.492406535 | 2.28E-16    | 0.289546987  | 4.06E-06    |
| -0.39429951  | 1.54E-10    | -0.397578427 | 1.05E-10    | 0.300017658  | 1.73E-06    |
| -0.356833378 | 9.08E-09    | -0.408429034 | 2.88E-11    | 0.700806564  | 1.64E-37    |
| -0.246212355 | 9.85E-05    | -0.231487311 | 0.0002576   | 0.441599477  | 4.08E-13    |
| -0.497475953 | 1.01E-16    | -0.428176179 | 2.41E-12    | 0.186401293  | 0.003406789 |
| -0.281928411 | 7.41E-06    | -0.309636222 | 7.66E-07    | 0.01135106   | 0.859689637 |
| -0.508555588 | 1.61E-17    | -0.591799784 | 1.53E-24    | 0.193834633  | 0.00230807  |
| 0.261278744  | 3.46E-05    | 0.212248196  | 0.000827602 | -0.408503389 | 2.85E-11    |
| 0.422065737  | 5.29E-12    | 0.249851845  | 7.70E-05    | 0.002738316  | 0.965986668 |
| 0.673422447  | 9.90E-34    | 0.665933595  | 9.12E-33    | -0.236054229 | 0.000192417 |
| -0.442117412 | 3.80E-13    | -0.438274221 | 6.38E-13    | 0.40001459   | 7.89E-11    |
| -0.386059254 | 3.95E-10    | -0.412722693 | 1.70E-11    | 0.375670668  | 1.25E-09    |
| -0.474375647 | 3.76E-15    | -0.492087933 | 2.40E-16    | 0.158032902  | 0.01326635  |
| -0.452457569 | 9.12E-14    | -0.483940245 | 8.68E-16    | 0.468721485  | 8.74E-15    |
| -0.281994842 | 7.37E-06    | -0.421193989 | 5.91E-12    | 0.241825109  | 0.000132001 |
| -0.375918365 | 1.21E-09    | -0.461085513 | 2.67E-14    | 0.199326416  | 0.001715496 |
| -0.5698689   | 1.70E-22    | -0.557833112 | 1.94E-21    | 0.475761621  | 3.05E-15    |
| -0.353919347 | 1.22E-08    | -0.419988555 | 6.88E-12    | 0.365373075  | 3.75E-09    |
| -0.372703515 | 1.72E-09    | -0.408557819 | 2.83E-11    | 0.242924534  | 0.000122728 |
| -0.458746789 | 3.74E-14    | -0.500841264 | 5.81E-17    | 0.253694465  | 5.91E-05    |
| 0.5005808    | 6.07E-17    | 0.569322267  | 1.90E-22    | -0.302667433 | 1.39E-06    |
| -0.242411818 | 0.000126974 | -0.337003331 | 6.41E-08    | 0.276351679  | 1.14E-05    |
| 0.423091105  | 4.64E-12    | 0.567920306  | 2.53E-22    | -0.1800344   | 0.004702947 |
| -0.50650778  | 2.27E-17    | -0.491020828 | 2.85E-16    | 0.421339769  | 5.80E-12    |
| -0.674822666 | 6.49E-34    | -0.394515512 | 1.50E-10    | 0.563474469  | 6.27E-22    |
| -0.297047438 | 2.21E-06    | -0.361369969 | 5.70E-09    | 0.255085373  | 5.36E-05    |
| 0.481125691  | 1.34E-15    | 0.250794511  | 7.21E-05    | -0.271451128 | 1.64E-05    |
| -0.348433706 | 2.11E-08    | -0.489232687 | 3.78E-16    | 0.235420905  | 0.00020043  |
| 0.558238294  | 1.79E-21    | 0.533092698  | 2.17E-19    | -0.090442766 | 0.158153976 |
| -0.542061827 | 4.10E-20    | -0.578016458 | 3.07E-23    | 0.049744674  | 0.438265575 |

|              |             |              |             |              |             |
|--------------|-------------|--------------|-------------|--------------|-------------|
| 0.342802087  | 3.67E-08    | 0.312226954  | 6.12E-07    | -0.496762428 | 1.13E-16    |
| -0.030332923 | 0.636594201 | -0.211327287 | 0.000872992 | 0.315574155  | 4.57E-07    |
| -0.500267429 | 6.39E-17    | -0.299092603 | 1.87E-06    | 0.387304476  | 3.43E-10    |
| -0.457199927 | 4.66E-14    | -0.35181934  | 1.51E-08    | 0.058946629  | 0.358230899 |
| -0.607513091 | 4.17E-26    | -0.533614329 | 1.97E-19    | 0.296442933  | 2.32E-06    |
| 0.628574516  | 2.41E-28    | 0.632591125  | 8.61E-29    | -0.398070669 | 9.92E-11    |
| 0.402881745  | 5.61E-11    | 0.439016704  | 5.77E-13    | -0.20552088  | 0.001216159 |
| 0.546790139  | 1.67E-20    | 0.552260798  | 5.81E-21    | -0.326336485 | 1.74E-07    |
| -0.515767677 | 4.70E-18    | -0.479860613 | 1.63E-15    | 0.221457271  | 0.000479262 |
| 0.645432645  | 2.90E-30    | 0.522442504  | 1.47E-18    | -0.551003491 | 7.42E-21    |
| 0.490639597  | 3.03E-16    | 0.270196935  | 1.81E-05    | -0.414004027 | 1.45E-11    |
| -0.282574526 | 7.05E-06    | -0.422824176 | 4.80E-12    | 0.440414847  | 4.78E-13    |
| 0.591624634  | 1.59E-24    | 0.649113994  | 1.07E-30    | -0.472277972 | 5.15E-15    |
| -0.621948169 | 1.27E-27    | -0.527881953 | 5.57E-19    | 0.488335887  | 4.36E-16    |
| 0.413518356  | 1.54E-11    | 0.420508921  | 6.44E-12    | -0.340701585 | 4.50E-08    |
| -0.47833883  | 2.06E-15    | -0.416745459 | 1.03E-11    | 0.485901429  | 6.39E-16    |
| -0.422064466 | 5.29E-12    | -0.390906952 | 2.28E-10    | 0.289221142  | 4.17E-06    |
| 0.375966529  | 1.21E-09    | 0.228904707  | 0.000303041 | -0.419686329 | 7.15E-12    |
| -0.525716107 | 8.21E-19    | -0.486308393 | 6.00E-16    | 0.357592508  | 8.40E-09    |
| 0.455390184  | 6.03E-14    | 0.393327039  | 1.72E-10    | -0.278803011 | 9.43E-06    |
| -0.359090247 | 7.21E-09    | -0.418055957 | 8.78E-12    | 0.274810015  | 1.28E-05    |
| 0.526518375  | 7.11E-19    | 0.368431865  | 2.72E-09    | -0.199817212 | 0.001669974 |
| 0.542311609  | 3.91E-20    | 0.414137857  | 1.43E-11    | -0.312667033 | 5.89E-07    |
| 0.503649731  | 3.66E-17    | 0.470236979  | 6.98E-15    | 0.096726288  | 0.131093065 |
| 0.44594785   | 2.25E-13    | 0.156082118  | 0.014461754 | -0.166411809 | 0.00906329  |
| -0.234638041 | 0.000210765 | -0.246069267 | 9.95E-05    | 0.142477049  | 0.025740615 |
| -0.527587106 | 5.87E-19    | -0.496922911 | 1.10E-16    | 0.473081611  | 4.56E-15    |
| -0.59058786  | 2.00E-24    | -0.568794136 | 2.12E-22    | 0.479424399  | 1.74E-15    |
| 0.692722557  | 2.37E-36    | 0.514611405  | 5.74E-18    | -0.572778571 | 9.26E-23    |
| 0.55088053   | 7.60E-21    | 0.457319694  | 4.58E-14    | -0.312004548 | 6.24E-07    |
| 0.52145937   | 1.74E-18    | 0.480989368  | 1.37E-15    | -0.165919538 | 0.009272812 |
| -0.307104466 | 9.52E-07    | -0.391238117 | 2.19E-10    | 0.423017971  | 4.69E-12    |
| -0.324323761 | 2.09E-07    | -0.357298218 | 8.66E-09    | 0.42752329   | 2.63E-12    |
| 0.244424283  | 0.000111059 | 0.238289354  | 0.000166467 | -0.156495007 | 0.014201148 |
| -0.374357268 | 1.44E-09    | -0.398922401 | 8.97E-11    | 0.185150147  | 0.003632537 |
| -0.538932661 | 7.37E-20    | -0.462583052 | 2.15E-14    | 0.188182121  | 0.003107336 |
| 0.446537539  | 2.08E-13    | 0.440971566  | 4.44E-13    | 0.067573801  | 0.292115197 |
| 0.516191234  | 4.37E-18    | 0.343322539  | 3.49E-08    | -0.359823492 | 6.68E-09    |
| 0.483555972  | 9.21E-16    | 0.299147608  | 1.86E-06    | -0.351198555 | 1.60E-08    |
| -0.530567312 | 3.43E-19    | -0.556265796 | 2.65E-21    | 0.366473667  | 3.34E-09    |



|              |             |              |             |              |             |
|--------------|-------------|--------------|-------------|--------------|-------------|
| -0.628427314 | 2.50E-28    | -0.558411294 | 1.73E-21    | 0.606241668  | 5.62E-26    |
| -0.574945797 | 5.88E-23    | -0.516278909 | 4.31E-18    | 0.441721433  | 4.01E-13    |
| 0.495304215  | 1.43E-16    | 0.536180591  | 1.23E-19    | -0.074236391 | 0.24701142  |
| -0.282995654 | 6.82E-06    | -0.275202192 | 1.24E-05    | 0.193422282  | 0.002359332 |
| -0.262290605 | 3.22E-05    | -0.199704764 | 0.001680305 | 0.205667136  | 0.001206176 |
| -0.549745405 | 9.47E-21    | -0.506085937 | 2.44E-17    | 0.465901918  | 1.32E-14    |
| 0.598500836  | 3.37E-25    | 0.445544413  | 2.38E-13    | -0.50846725  | 1.63E-17    |
| -0.305389212 | 1.10E-06    | -0.272192326 | 1.56E-05    | 0.252292214  | 6.51E-05    |
| 0.24039359   | 0.000145061 | 0.411618879  | 1.95E-11    | -0.376939495 | 1.09E-09    |
| -0.566048073 | 3.72E-22    | -0.409459353 | 2.54E-11    | 0.646831386  | 1.99E-30    |
| -0.284145103 | 6.23E-06    | -0.30996973  | 7.44E-07    | 0.117411897  | 0.066544321 |
| -0.446702347 | 2.03E-13    | -0.449041395 | 1.47E-13    | 0.325466036  | 1.88E-07    |
| -0.653901411 | 2.83E-31    | -0.559248186 | 1.47E-21    | 0.544294307  | 2.69E-20    |
| -0.450724098 | 1.16E-13    | -0.386121774 | 3.92E-10    | 0.455099674  | 6.28E-14    |
| -0.580715936 | 1.73E-23    | -0.477425742 | 2.37E-15    | 0.480782232  | 1.41E-15    |
| -0.565342158 | 4.29E-22    | -0.442866748 | 3.43E-13    | 0.130642607  | 0.041033887 |
| -0.627058907 | 3.54E-28    | -0.469078998 | 8.29E-15    | 0.383053234  | 5.53E-10    |
| -0.469479237 | 7.81E-15    | -0.46864579  | 8.84E-15    | 0.406972671  | 3.43E-11    |
| -0.327625129 | 1.54E-07    | -0.382402067 | 5.95E-10    | 0.27105102   | 1.69E-05    |
| 0.460083287  | 3.08E-14    | 0.383815836  | 5.08E-10    | -0.168018313 | 0.008408447 |
| 0.271936834  | 1.59E-05    | 0.272126807  | 1.56E-05    | -0.281977097 | 7.38E-06    |
| 0.453127581  | 8.30E-14    | 0.478804371  | 1.92E-15    | -0.392965544 | 1.80E-10    |
| 0.600973602  | 1.91E-25    | 0.486955607  | 5.42E-16    | -0.468455959 | 9.09E-15    |
| 0.486112895  | 6.18E-16    | 0.22622937   | 0.0003579   | -0.187529336 | 0.003214218 |
| -0.195520343 | 0.002108883 | -0.278579935 | 9.60E-06    | 0.234289571  | 0.000215524 |
| -0.331897287 | 1.04E-07    | -0.33090816  | 1.14E-07    | 0.234522819  | 0.000212328 |
| -0.5913917   | 1.67E-24    | -0.505652406 | 2.62E-17    | 0.394568585  | 1.49E-10    |
| -0.189980327 | 0.002829358 | -0.409015466 | 2.68E-11    | 0.199366255  | 0.001711759 |
| -0.604771514 | 7.92E-26    | -0.480300415 | 1.52E-15    | 0.438091964  | 6.54E-13    |
| -0.644901036 | 3.35E-30    | -0.586657123 | 4.76E-24    | 0.558454902  | 1.72E-21    |
| -0.367343426 | 3.05E-09    | -0.381129925 | 6.85E-10    | 0.586954853  | 4.46E-24    |
| -0.248270562 | 8.57E-05    | -0.425635406 | 3.35E-12    | 0.10680306   | 0.095324248 |
| -0.452235044 | 9.41E-14    | -0.49642109  | 1.20E-16    | 0.339676835  | 4.96E-08    |
| -0.310210941 | 7.29E-07    | -0.225419722 | 0.000376239 | 0.382428404  | 5.93E-10    |
| 0.540159362  | 5.86E-20    | 0.281614984  | 7.59E-06    | -0.160514359 | 0.011871772 |
| -0.588010843 | 3.53E-24    | -0.41729771  | 9.65E-12    | 0.286284988  | 5.27E-06    |
| -0.361116902 | 5.85E-09    | -0.384069811 | 4.94E-10    | 0.471545955  | 5.74E-15    |
| -0.488116329 | 4.51E-16    | -0.357940668 | 8.11E-09    | 0.449517901  | 1.37E-13    |
| -0.364743149 | 4.01E-09    | -0.395182176 | 1.39E-10    | 0.254733873  | 5.49E-05    |
| -0.628786882 | 2.28E-28    | -0.548100798 | 1.30E-20    | 0.590228111  | 2.17E-24    |

|              |             |              |             |              |             |
|--------------|-------------|--------------|-------------|--------------|-------------|
| 0.646663146  | 2.08E-30    | 0.386802249  | 3.63E-10    | -0.084804914 | 0.185834394 |
| -0.537554331 | 9.52E-20    | -0.542137071 | 4.04E-20    | 0.414329961  | 1.40E-11    |
| -0.445330973 | 2.45E-13    | -0.45362699  | 7.73E-14    | 0.326012963  | 1.79E-07    |
| 0.292997988  | 3.08E-06    | 0.303310726  | 1.31E-06    | -0.083839564 | 0.19091082  |
| 0.699825198  | 2.27E-37    | 0.725244344  | 2.86E-41    | -0.363940988 | 4.36E-09    |
| -0.450986828 | 1.12E-13    | -0.431981811 | 1.47E-12    | 0.461090371  | 2.67E-14    |
| 0.377050472  | 1.07E-09    | 0.338928896  | 5.33E-08    | -0.086300646 | 0.178165844 |
| -0.492382313 | 2.29E-16    | -0.316458953 | 4.22E-07    | 0.470735572  | 6.48E-15    |
| -0.329058156 | 1.35E-07    | -0.428045217 | 2.46E-12    | 0.32509679   | 1.94E-07    |
| -0.588954472 | 2.87E-24    | -0.528437862 | 5.04E-19    | 0.380677721  | 7.20E-10    |
| 0.347871976  | 2.23E-08    | 0.673591439  | 9.41E-34    | -0.298229283 | 2.01E-06    |
| -0.182479298 | 0.004160275 | -0.17163951  | 0.007084266 | -0.055033609 | 0.39108183  |
| 0.285119402  | 5.77E-06    | 0.183688735  | 0.003913283 | -0.187038119 | 0.00329683  |
| 0.563586151  | 6.13E-22    | 0.438551644  | 6.15E-13    | -0.322887031 | 2.38E-07    |
| -0.217245665 | 0.000617005 | -0.297778116 | 2.08E-06    | 0.264712636  | 2.70E-05    |
| -0.240379116 | 0.000145199 | -0.377836978 | 9.85E-10    | 0.119821954  | 0.061113821 |
| 0.399119857  | 8.77E-11    | 0.359739819  | 6.74E-09    | -0.115085302 | 0.072155345 |
| -0.626374607 | 4.20E-28    | -0.579393344 | 2.29E-23    | 0.501170694  | 5.51E-17    |
| 0.633240013  | 7.29E-29    | 0.492791738  | 2.15E-16    | -0.403838805 | 5.01E-11    |
| -0.575445366 | 5.29E-23    | -0.567188578 | 2.94E-22    | 0.407956701  | 3.05E-11    |
| 0.717712924  | 4.53E-40    | 0.450146797  | 1.26E-13    | -0.413215882 | 1.60E-11    |
| -0.435428745 | 9.32E-13    | -0.514057809 | 6.31E-18    | 0.187810811  | 0.003167729 |
| -0.364675482 | 4.04E-09    | -0.380715718 | 7.17E-10    | 0.408175045  | 2.97E-11    |
| -0.49113032  | 2.80E-16    | -0.427005817 | 2.81E-12    | 0.316268591  | 4.29E-07    |
| -0.347719806 | 2.27E-08    | -0.265013733 | 2.64E-05    | 0.219800749  | 0.000529629 |
| 0.408225505  | 2.95E-11    | 0.431047042  | 1.66E-12    | -0.154516443 | 0.015488432 |
| -0.439608315 | 5.33E-13    | -0.407649874 | 3.16E-11    | 0.476819524  | 2.59E-15    |
| 0.498518628  | 8.51E-17    | 0.314420529  | 5.05E-07    | -0.481748854 | 1.22E-15    |
| -0.575336684 | 5.41E-23    | -0.571948387 | 1.10E-22    | 0.432502362  | 1.37E-12    |
| -0.626731423 | 3.84E-28    | -0.493682203 | 1.86E-16    | 0.354482367  | 1.15E-08    |
| -0.381933852 | 6.26E-10    | -0.421151985 | 5.94E-12    | 0.178861369  | 0.004985261 |
| 0.305691851  | 1.07E-06    | 0.336101558  | 6.98E-08    | -0.522212828 | 1.53E-18    |
| 0.435004657  | 9.86E-13    | 0.623002999  | 9.78E-28    | 0.008848718  | 0.89039949  |
| 0.563508425  | 6.23E-22    | 0.429929631  | 1.92E-12    | -0.387726445 | 3.27E-10    |
| -0.273132961 | 1.45E-05    | -0.293937523 | 2.85E-06    | 0.232541687  | 0.000240943 |
| -0.436820999 | 7.75E-13    | -0.366353483 | 3.38E-09    | 0.504289752  | 3.29E-17    |
| 0.615857203  | 5.66E-27    | 0.519381757  | 2.51E-18    | -0.241045956 | 0.000138966 |
| 0.448688299  | 1.54E-13    | 0.491149418  | 2.79E-16    | -0.517379025 | 3.56E-18    |
| 0.434428298  | 1.06E-12    | 0.331879892  | 1.04E-07    | -0.150238206 | 0.018625434 |
| -0.558764694 | 1.61E-21    | -0.436838446 | 7.73E-13    | 0.190082265  | 0.002814297 |

|              |             |              |             |              |             |
|--------------|-------------|--------------|-------------|--------------|-------------|
| 0.584660907  | 7.36E-24    | 0.616845239  | 4.46E-27    | -0.131788208 | 0.039278117 |
| -0.64286893  | 5.79E-30    | -0.514044941 | 6.33E-18    | 0.338592941  | 5.51E-08    |
| 0.290988971  | 3.62E-06    | 0.186804719  | 0.003336752 | -0.330824216 | 1.15E-07    |
| -0.359993    | 6.57E-09    | -0.248515342 | 8.43E-05    | 0.064036118  | 0.318171355 |
| 0.673246804  | 1.04E-33    | 0.443451285  | 3.17E-13    | -0.340008817 | 4.81E-08    |
| 0.404007184  | 4.91E-11    | 0.492280579  | 2.33E-16    | -0.074646305 | 0.244404174 |
| 0.285017587  | 5.82E-06    | 0.166057465  | 0.009213678 | -0.379696323 | 8.02E-10    |
| -0.514096818 | 6.27E-18    | -0.357340485 | 8.62E-09    | 0.075724459  | 0.237638475 |
| 0.544080825  | 2.80E-20    | 0.437433469  | 7.14E-13    | -0.112472439 | 0.078909591 |
| -0.41262729  | 1.72E-11    | -0.431068183 | 1.66E-12    | 0.374698649  | 1.39E-09    |
| 0.520112134  | 2.21E-18    | 0.399663091  | 8.22E-11    | -0.280265541 | 8.43E-06    |
| 0.395917763  | 1.28E-10    | 0.345258963  | 2.89E-08    | -0.128500127 | 0.04449504  |
| -0.605553566 | 6.60E-26    | -0.409876948 | 2.41E-11    | 0.555985427  | 2.80E-21    |
| -0.410118906 | 2.34E-11    | -0.416497053 | 1.07E-11    | 0.277563069  | 1.04E-05    |
| -0.654128999 | 2.66E-31    | -0.644918336 | 3.34E-30    | 0.421253367  | 5.86E-12    |
| -0.58264378  | 1.14E-23    | -0.567254493 | 2.90E-22    | 0.314343089  | 5.09E-07    |
| 0.403841452  | 5.01E-11    | 0.289069607  | 4.22E-06    | -0.302373552 | 1.42E-06    |
| 0.41179177   | 1.91E-11    | 0.326087415  | 1.78E-07    | -0.345655444 | 2.78E-08    |
| 0.516518442  | 4.13E-18    | 0.685108586  | 2.71E-35    | -0.319847602 | 3.12E-07    |
| 0.39168874   | 2.08E-10    | 0.420459749  | 6.48E-12    | 0.004274119  | 0.946933014 |
| 0.588806527  | 2.97E-24    | 0.503894021  | 3.51E-17    | -0.260648679 | 3.62E-05    |
| 0.456002485  | 5.53E-14    | 0.519221678  | 2.58E-18    | -0.170213673 | 0.007581663 |
| 0.631626108  | 1.10E-28    | 0.503312099  | 3.87E-17    | -0.169424165 | 0.00787026  |
| -0.418408939 | 8.40E-12    | -0.363762099 | 4.44E-09    | 0.063745279  | 0.3203788   |
| -0.481927391 | 1.19E-15    | -0.453425235 | 7.96E-14    | 0.442636475  | 3.54E-13    |
| -0.562502213 | 7.63E-22    | -0.50874183  | 1.56E-17    | 0.274316739  | 1.33E-05    |
| -0.449983785 | 1.29E-13    | -0.358164596 | 7.92E-09    | 0.515973759  | 4.54E-18    |
| -0.476442055 | 2.75E-15    | -0.476040137 | 2.92E-15    | 0.279675965  | 8.82E-06    |
| -0.589582164 | 2.50E-24    | -0.49003195  | 3.33E-16    | 0.511153817  | 1.04E-17    |
| -0.464899457 | 1.53E-14    | -0.379468206 | 8.23E-10    | 0.427300759  | 2.70E-12    |
| 0.612547443  | 1.26E-26    | 0.288729128  | 4.34E-06    | -0.415815197 | 1.16E-11    |
| -0.521670942 | 1.68E-18    | -0.58487933  | 7.01E-24    | 0.37131111   | 2.00E-09    |
| 0.382515084  | 5.87E-10    | 0.661515998  | 3.28E-32    | -0.180341536 | 0.004631444 |
| -0.470748316 | 6.47E-15    | -0.571815217 | 1.13E-22    | 0.200939238  | 0.001570025 |
| -0.147310554 | 0.021078195 | -0.032381925 | 0.613982066 | 0.405626058  | 4.04E-11    |
| 0.60588699   | 6.10E-26    | 0.503217348  | 3.93E-17    | -0.309219324 | 7.94E-07    |
| 0.459117878  | 3.54E-14    | 0.47289761   | 4.69E-15    | -0.306656434 | 9.89E-07    |
| 0.335586965  | 7.33E-08    | 0.339984671  | 4.82E-08    | -0.196328295 | 0.002019082 |
| 0.565183787  | 4.43E-22    | 0.490436934  | 3.12E-16    | -0.358175709 | 7.92E-09    |
| 0.439886053  | 5.14E-13    | 0.297772941  | 2.08E-06    | -0.137603489 | 0.03131296  |

|              |             |              |             |              |             |
|--------------|-------------|--------------|-------------|--------------|-------------|
| 0.085914476  | 0.180122933 | -0.192927895 | 0.002422157 | 0.273707654  | 1.39E-05    |
| 0.483673185  | 9.05E-16    | 0.45337754   | 8.01E-14    | -0.268741758 | 2.01E-05    |
| 0.389689437  | 2.62E-10    | 0.425369711  | 3.47E-12    | -0.274101554 | 1.35E-05    |
| -0.565449861 | 4.20E-22    | -0.462715914 | 2.11E-14    | 0.264340273  | 2.77E-05    |
| -0.366202353 | 3.44E-09    | 0.072428297  | 0.258742479 | 0.440001922  | 5.06E-13    |
| 0.240324699  | 0.000145719 | 0.1712656    | 0.007211804 | -0.137142031 | 0.031890276 |
| 0.615450885  | 6.25E-27    | 0.477786284  | 2.24E-15    | -0.305999189 | 1.05E-06    |
| 0.431563079  | 1.55E-12    | 0.224352775  | 0.000401741 | -0.186071882 | 0.003464961 |
| -0.325907622 | 1.81E-07    | -0.225715499 | 0.000369441 | 0.22108103   | 0.000490295 |
| -0.414839788 | 1.31E-11    | -0.381910798 | 6.28E-10    | 0.054639779  | 0.39448592  |
| 0.405345037  | 4.18E-11    | 0.570518614  | 1.48E-22    | -0.115581719 | 0.070926897 |
| 0.29484135   | 2.65E-06    | 0.445108464  | 2.53E-13    | -0.264733039 | 2.70E-05    |
| -0.569472376 | 1.84E-22    | -0.380476323 | 7.36E-10    | 0.514835727  | 5.52E-18    |
| -0.362676338 | 4.97E-09    | -0.478296755 | 2.07E-15    | -0.085603534 | 0.181710269 |
| -0.465117001 | 1.49E-14    | -0.509710642 | 1.32E-17    | 0.172151626  | 0.006912854 |
| -0.330576308 | 1.17E-07    | -0.476881815 | 2.57E-15    | 0.369737223  | 2.36E-09    |
| -0.33371576  | 8.75E-08    | -0.312852513 | 5.80E-07    | 0.37529531   | 1.30E-09    |
| -0.473218015 | 4.47E-15    | -0.352596026 | 1.39E-08    | 0.245932264  | 0.000100381 |
| -0.434054877 | 1.12E-12    | -0.41295835  | 1.65E-11    | 0.430722078  | 1.73E-12    |
| 0.372666249  | 1.73E-09    | 0.380484271  | 7.36E-10    | -0.128068118 | 0.045221815 |
| 0.44340446   | 3.19E-13    | 0.393098396  | 1.77E-10    | -0.509060663 | 1.48E-17    |
| 0.442201895  | 3.76E-13    | 0.397142247  | 1.11E-10    | -0.056170446 | 0.381355431 |
| -0.562370566 | 7.84E-22    | -0.480672968 | 1.44E-15    | 0.454741695  | 6.61E-14    |
| 0.28040926   | 8.34E-06    | 0.365400646  | 3.74E-09    | -0.3148779   | 4.85E-07    |
| -0.53910013  | 7.14E-20    | -0.572277898 | 1.03E-22    | 0.232113543  | 0.000247582 |
| -0.493136518 | 2.03E-16    | -0.608807386 | 3.07E-26    | 0.334106583  | 8.43E-08    |
| 0.342129643  | 3.92E-08    | 0.193849927  | 0.002306188 | -0.355976399 | 9.91E-09    |
| 0.266421698  | 2.38E-05    | 0.361908858  | 5.39E-09    | -0.131861249 | 0.039168356 |
| 0.558513731  | 1.70E-21    | 0.455066863  | 6.31E-14    | -0.388757281 | 2.91E-10    |
| -0.692755396 | 2.34E-36    | -0.582275839 | 1.23E-23    | 0.477632275  | 2.29E-15    |
| -0.384465258 | 4.72E-10    | -0.471117204 | 6.12E-15    | 0.206763764  | 0.001133686 |
| -0.428440978 | 2.33E-12    | -0.015310428 | 0.811544096 | 0.340901354  | 4.41E-08    |
| 0.609918953  | 2.36E-26    | 0.308164226  | 8.69E-07    | -0.299356033 | 1.83E-06    |
| -0.288416524 | 4.45E-06    | -0.267268621 | 2.24E-05    | 0.154684559  | 0.015375219 |
| -0.431685554 | 1.53E-12    | -0.499095419 | 7.74E-17    | 0.172572578  | 0.006774739 |
| -0.344513655 | 3.11E-08    | -0.555605534 | 3.02E-21    | 0.249233212  | 8.03E-05    |
| -0.482234275 | 1.13E-15    | -0.505125398 | 2.86E-17    | 0.304635534  | 1.17E-06    |
| -0.69251512  | 2.53E-36    | -0.594475049 | 8.39E-25    | 0.375429684  | 1.28E-09    |
| -0.366534539 | 3.32E-09    | -0.339675032 | 4.97E-08    | 0.309144964  | 7.99E-07    |
| -0.392616951 | 1.87E-10    | -0.272446752 | 1.53E-05    | 0.463220587  | 1.96E-14    |

|              |             |              |             |              |             |
|--------------|-------------|--------------|-------------|--------------|-------------|
| -0.650862371 | 6.59E-31    | -0.552502379 | 5.55E-21    | 0.447340248  | 1.86E-13    |
| 0.46717174   | 1.10E-14    | 0.293614871  | 2.93E-06    | -0.352364167 | 1.43E-08    |
| 0.587953482  | 3.58E-24    | 0.474328335  | 3.78E-15    | -0.270280512 | 1.79E-05    |
| 0.306390894  | 1.01E-06    | 0.370119523  | 2.27E-09    | 0.232188771  | 0.000246403 |
| -0.646424328 | 2.22E-30    | -0.614257605 | 8.34E-27    | 0.403174201  | 5.42E-11    |
| -0.54801899  | 1.32E-20    | -0.453449364 | 7.93E-14    | 0.533156636  | 2.14E-19    |
| -0.421721428 | 5.53E-12    | -0.433650415 | 1.18E-12    | 0.261502379  | 3.40E-05    |
| -0.315605369 | 4.55E-07    | -0.240330751 | 0.000145661 | 0.369287024  | 2.48E-09    |
| -0.612682426 | 1.22E-26    | -0.546155132 | 1.89E-20    | 0.494981402  | 1.51E-16    |
| -0.583247152 | 1.00E-23    | -0.574793709 | 6.07E-23    | 0.360327303  | 6.34E-09    |
| -0.63022152  | 1.58E-28    | -0.502714984 | 4.27E-17    | 0.407723367  | 3.14E-11    |
| 0.715477238  | 1.01E-39    | 0.520276692  | 2.15E-18    | -0.448504898 | 1.58E-13    |
| -0.488529185 | 4.23E-16    | -0.377159304 | 1.06E-09    | 0.258764341  | 4.14E-05    |
| 0.31538181   | 4.64E-07    | 0.311171464  | 6.71E-07    | -0.23945822  | 0.000154237 |
| 0.380404708  | 7.42E-10    | 0.318060173  | 3.66E-07    | -0.362144923 | 5.26E-09    |
| 0.439652508  | 5.30E-13    | 0.501413515  | 5.29E-17    | 0.036001274  | 0.574927681 |
| 0.520413121  | 2.10E-18    | 0.50329121   | 3.88E-17    | -0.329002837 | 1.36E-07    |
| 0.251132205  | 7.05E-05    | 0.343122668  | 3.56E-08    | 0.239691897  | 0.000151895 |
| -0.617345614 | 3.94E-27    | -0.52460199  | 1.00E-18    | 0.641799154  | 7.70E-30    |
| 0.478678581  | 1.95E-15    | 0.403792399  | 5.03E-11    | -0.299490914 | 1.81E-06    |
| -0.378828496 | 8.83E-10    | -0.344560055 | 3.09E-08    | 0.160470859  | 0.011895061 |
| 0.58689318   | 4.52E-24    | 0.380151121  | 7.63E-10    | 0.014753048  | 0.818283489 |
| 0.495324436  | 1.43E-16    | 0.296486385  | 2.32E-06    | -0.285358417 | 5.67E-06    |
| -0.09800447  | 0.126053198 | -0.227763093 | 0.000325416 | 0.060891679  | 0.342563488 |
| 0.392806346  | 1.83E-10    | 0.555927433  | 2.83E-21    | -0.315757032 | 4.49E-07    |
| 0.490550731  | 3.07E-16    | 0.368502476  | 2.70E-09    | -0.172928014 | 0.006660044 |
| -0.510378743 | 1.18E-17    | -0.398477476 | 9.45E-11    | 0.173546068  | 0.006464732 |
| -0.411740018 | 1.92E-11    | -0.44998894  | 1.29E-13    | 0.252017851  | 6.63E-05    |
| 0.46865579   | 8.82E-15    | 0.47848083   | 2.01E-15    | -0.20026979  | 0.001628979 |
| 0.412127078  | 1.83E-11    | 0.274740825  | 1.29E-05    | -0.423526971 | 4.39E-12    |
| 0.382116728  | 6.14E-10    | 0.240964052  | 0.000139718 | -0.302745336 | 1.38E-06    |
| -0.483013045 | 1.00E-15    | -0.532200323 | 2.55E-19    | 0.477271332  | 2.42E-15    |
| -0.555217872 | 3.26E-21    | -0.464934266 | 1.53E-14    | 0.402186272  | 6.10E-11    |
| -0.587901652 | 3.62E-24    | -0.397169848 | 1.10E-10    | 0.497184535  | 1.06E-16    |
| 0.286006911  | 5.38E-06    | 0.310203059  | 7.29E-07    | 0.00497073   | 0.938299924 |
| 0.246668126  | 9.55E-05    | 0.354759033  | 1.12E-08    | 0.080363237  | 0.210031411 |
| 0.211234377  | 0.000877696 | 0.247021462  | 9.33E-05    | -0.082588094 | 0.197641866 |
| 0.221575093  | 0.000475854 | 0.306593433  | 9.94E-07    | -0.447050567 | 1.93E-13    |
| -0.38265978  | 5.78E-10    | -0.48079147  | 1.41E-15    | 0.386868179  | 3.60E-10    |
| 0.623434473  | 8.78E-28    | 0.458482196  | 3.88E-14    | -0.336103293 | 6.98E-08    |

|              |             |              |             |              |             |
|--------------|-------------|--------------|-------------|--------------|-------------|
| -0.572864343 | 9.10E-23    | -0.3993377   | 8.54E-11    | 0.560806063  | 1.07E-21    |
| -0.503237778 | 3.92E-17    | -0.469123404 | 8.23E-15    | -0.042201968 | 0.510872262 |
| 0.428238889  | 2.40E-12    | 0.306997122  | 9.61E-07    | -0.31116167  | 6.71E-07    |
| 0.394842568  | 1.45E-10    | 0.369518079  | 2.42E-09    | -0.329514224 | 1.30E-07    |
| 0.655377113  | 1.88E-31    | 0.496944912  | 1.10E-16    | -0.322291185 | 2.51E-07    |
| 0.410486279  | 2.24E-11    | 0.412599774  | 1.73E-11    | 0.047594838  | 0.458337245 |
| -0.226478314 | 0.00035243  | -0.352303506 | 1.44E-08    | 0.189110504  | 0.002960872 |
| -0.368806146 | 2.61E-09    | -0.460169115 | 3.05E-14    | 0.179388641  | 0.004856529 |
| -0.439419935 | 5.47E-13    | -0.508999297 | 1.49E-17    | 0.410392469  | 2.27E-11    |
| -0.62106108  | 1.58E-27    | -0.559749647 | 1.33E-21    | 0.437069481  | 7.49E-13    |
| -0.207556167 | 0.001083822 | -0.352474535 | 1.41E-08    | 0.30835978   | 8.55E-07    |
| -0.306214783 | 1.03E-06    | -0.348773282 | 2.04E-08    | 0.47100398   | 6.23E-15    |
| 0.345614767  | 2.79E-08    | 0.379773215  | 7.96E-10    | -0.06777687  | 0.290664057 |
| 0.725450707  | 2.65E-41    | 0.756265675  | 1.14E-46    | -0.330383362 | 1.19E-07    |
| 0.544796911  | 2.44E-20    | 0.622327428  | 1.16E-27    | -0.338732852 | 5.43E-08    |
| -0.376634962 | 1.12E-09    | -0.307970825 | 8.84E-07    | 0.544110325  | 2.78E-20    |
| 0.45840068   | 3.93E-14    | 0.296952936  | 2.23E-06    | -0.335028242 | 7.73E-08    |
| -0.498847131 | 8.06E-17    | -0.55038351  | 8.37E-21    | 0.418588952  | 8.21E-12    |
| -0.594030802 | 9.27E-25    | -0.464083145 | 1.73E-14    | 0.354893391  | 1.11E-08    |
| 0.434156446  | 1.10E-12    | 0.360091806  | 6.50E-09    | -0.34446514  | 3.12E-08    |
| -0.277088257 | 1.08E-05    | -0.381136688 | 6.84E-10    | 0.200586458  | 0.001600845 |
| -0.351954842 | 1.49E-08    | -0.015598059 | 0.808071679 | 0.245990678  | 1.00E-04    |
| 0.471973917  | 5.39E-15    | 0.409594217  | 2.50E-11    | 0.074133826  | 0.247666797 |
| -0.318060506 | 3.66E-07    | -0.520216111 | 2.17E-18    | 0.295134591  | 2.59E-06    |
| -0.379444822 | 8.25E-10    | -0.413012588 | 1.64E-11    | 0.442392868  | 3.66E-13    |
| -0.421807088 | 5.47E-12    | -0.480682515 | 1.44E-15    | 0.346628373  | 2.53E-08    |
| -0.185331979 | 0.00359891  | -0.265124044 | 2.62E-05    | 0.194542335  | 0.002222449 |
| -0.503077637 | 4.02E-17    | -0.511092092 | 1.05E-17    | 0.366821815  | 3.22E-09    |
| -0.418893339 | 7.90E-12    | -0.383684348 | 5.15E-10    | 0.192725036  | 0.002448373 |
| 0.370141508  | 2.26E-09    | 0.214232933  | 0.000737082 | -0.170465572 | 0.007491589 |
| -0.369346711 | 2.46E-09    | -0.520451058 | 2.08E-18    | 0.07589318   | 0.236591723 |
| 0.686224702  | 1.90E-35    | 0.462942832  | 2.04E-14    | -0.561169154 | 9.98E-22    |
| 0.559607532  | 1.36E-21    | 0.563473445  | 6.27E-22    | 0.090673098  | 0.157092971 |
| 0.451201144  | 1.09E-13    | 0.480402836  | 1.50E-15    | -0.398114651 | 9.87E-11    |
| -0.026837138 | 0.675950991 | 0.003110306  | 0.961369465 | 0.063220062  | 0.324390292 |
| -0.300170747 | 1.71E-06    | -0.317052639 | 4.01E-07    | -0.014077107 | 0.826474312 |
| -0.404882053 | 4.42E-11    | -0.416820471 | 1.02E-11    | 0.083225822  | 0.194190583 |
| -0.560334575 | 1.18E-21    | -0.652233538 | 4.51E-31    | 0.188108997  | 0.003119146 |
| 0.351337082  | 1.58E-08    | 0.457904013  | 4.21E-14    | -0.119094333 | 0.062713491 |
| -0.258403622 | 4.25E-05    | -0.213259534 | 0.000780269 | 0.350292866  | 1.76E-08    |

|              |             |              |             |              |             |
|--------------|-------------|--------------|-------------|--------------|-------------|
| 0.644351057  | 3.89E-30    | 0.459587577  | 3.31E-14    | -0.457256169 | 4.62E-14    |
| 0.530733245  | 3.33E-19    | 0.412306014  | 1.79E-11    | -0.064040138 | 0.318140913 |
| 0.372163824  | 1.82E-09    | 0.364343729  | 4.18E-09    | -0.449548414 | 1.37E-13    |
| -0.365498015 | 3.70E-09    | -0.320696618 | 2.89E-07    | 0.348185352  | 2.17E-08    |
| 0.35287427   | 1.36E-08    | 0.349210776  | 1.96E-08    | -0.307057766 | 9.56E-07    |
| 0.474383049  | 3.75E-15    | 0.458942793  | 3.63E-14    | -0.371703612 | 1.92E-09    |
| 0.626160724  | 4.43E-28    | 0.427749483  | 2.55E-12    | -0.136433292 | 0.032794608 |
| 0.190813305  | 0.002708406 | 0.235434858  | 0.00020025  | -0.384359396 | 4.78E-10    |
| -0.589301578 | 2.66E-24    | -0.460306103 | 2.99E-14    | 0.452131244  | 9.54E-14    |
| -0.42444996  | 3.90E-12    | -0.43374622  | 1.17E-12    | 0.347431978  | 2.33E-08    |
| 0.614388698  | 8.08E-27    | 0.534031195  | 1.82E-19    | -0.615011013 | 6.95E-27    |
| -0.514087269 | 6.28E-18    | -0.585793034 | 5.75E-24    | 0.173879563  | 0.006361484 |
| 0.448581259  | 1.57E-13    | 0.446412994  | 2.11E-13    | -0.175348059 | 0.005924179 |
| -0.390272908 | 2.45E-10    | -0.277293649 | 1.06E-05    | 0.549334014  | 1.03E-20    |
| -0.460788269 | 2.79E-14    | -0.332055181 | 1.02E-07    | 0.189859207  | 0.002847347 |
| -0.511375391 | 9.98E-18    | -0.577178595 | 3.67E-23    | 0.010173539  | 0.874117341 |
| -0.705599075 | 3.22E-38    | -0.636735021 | 2.94E-29    | 0.393829334  | 1.63E-10    |
| 0.3330138    | 9.35E-08    | 0.397575178  | 1.05E-10    | 0.17868271   | 0.00502957  |
| 0.671293105  | 1.87E-33    | 0.683219538  | 4.90E-35    | -0.300347363 | 1.68E-06    |
| 0.427470836  | 2.65E-12    | 0.404475283  | 4.64E-11    | 0.023464814  | 0.7147722   |
| 0.460155117  | 3.05E-14    | 0.310141816  | 7.33E-07    | -0.152510545 | 0.016896549 |
| 0.638430512  | 1.88E-29    | 0.608394301  | 3.38E-26    | -0.148889256 | 0.01972291  |
| -0.289331494 | 4.14E-06    | -0.237170033 | 0.000179024 | 0.27004445   | 1.83E-05    |
| -0.500476352 | 6.17E-17    | -0.497649751 | 9.80E-17    | -0.001898079 | 0.976419777 |
| -0.447543964 | 1.81E-13    | -0.474815602 | 3.51E-15    | 0.423340009  | 4.50E-12    |
| 0.454535572  | 6.80E-14    | 0.348629111  | 2.07E-08    | -0.490825612 | 2.94E-16    |
| -0.375785078 | 1.23E-09    | -0.323541811 | 2.24E-07    | 0.062810164  | 0.327543493 |
| -0.416300264 | 1.09E-11    | -0.484904769 | 7.47E-16    | 0.657794392  | 9.49E-32    |
| 0.701319596  | 1.38E-37    | 0.606157514  | 5.73E-26    | -0.424313996 | 3.97E-12    |
| -0.635356639 | 4.21E-29    | -0.642282207 | 6.77E-30    | 0.420372661  | 6.56E-12    |
| -0.43885656  | 5.90E-13    | -0.42861806  | 2.28E-12    | 0.272046736  | 1.57E-05    |
| -0.515217326 | 5.17E-18    | -0.436324419 | 8.28E-13    | 0.20996721   | 0.000944234 |
| 0.716981547  | 5.90E-40    | 0.612673808  | 1.22E-26    | -0.368412286 | 2.72E-09    |
| 0.648948046  | 1.12E-30    | 0.572377383  | 1.01E-22    | -0.299555638 | 1.80E-06    |
| 0.241589627  | 0.000134071 | 0.433625216  | 1.18E-12    | 0.116787172  | 0.068014685 |
| -0.323746488 | 2.20E-07    | -0.234826008 | 0.000208239 | 0.505798759  | 2.56E-17    |
| -0.463801246 | 1.80E-14    | -0.393208181 | 1.75E-10    | 0.254042549  | 5.76E-05    |
| -0.252314014 | 6.50E-05    | -0.278263695 | 9.83E-06    | 0.078033751  | 0.223592187 |
| -0.539794994 | 6.27E-20    | -0.481130595 | 1.34E-15    | 0.514149167  | 6.21E-18    |
| -0.456557295 | 5.11E-14    | -0.358884273 | 7.36E-09    | 0.492901667  | 2.11E-16    |

|              |             |              |             |              |             |
|--------------|-------------|--------------|-------------|--------------|-------------|
| -0.451789026 | 1.00E-13    | -0.367927287 | 2.86E-09    | 0.050499716  | 0.431337225 |
| -0.518022864 | 3.18E-18    | -0.490169766 | 3.26E-16    | 0.432146696  | 1.44E-12    |
| -0.358412143 | 7.73E-09    | -0.37323257  | 1.62E-09    | 0.032278795  | 0.615111739 |
| -0.224589746 | 0.000395942 | -0.333296485 | 9.10E-08    | 0.02841275   | 0.658094966 |
| -0.508504491 | 1.62E-17    | -0.477789564 | 2.24E-15    | 0.430095353  | 1.88E-12    |
| -0.379592039 | 8.12E-10    | -0.37717123  | 1.06E-09    | 0.441131544  | 4.34E-13    |
| -0.455076339 | 6.30E-14    | -0.501966049 | 4.83E-17    | 0.241048382  | 0.000138944 |
| -0.520943236 | 1.91E-18    | -0.536451514 | 1.17E-19    | 0.24068693   | 0.00014229  |
| -0.567338408 | 2.85E-22    | -0.582965803 | 1.06E-23    | 0.354643109  | 1.13E-08    |
| -0.334186469 | 8.37E-08    | -0.262187338 | 3.24E-05    | 0.058015254  | 0.365889249 |
| -0.00975602  | 0.879243306 | -0.190866998 | 0.002700773 | -0.036783617 | 0.566641856 |
| -0.252575312 | 6.38E-05    | -0.298471713 | 1.97E-06    | 0.12386038   | 0.052834739 |
| -0.585545456 | 6.07E-24    | -0.513566748 | 6.87E-18    | 0.344119926  | 3.23E-08    |
| -0.396476683 | 1.19E-10    | -0.343302995 | 3.50E-08    | 0.4414692    | 4.15E-13    |
| -0.55746757  | 2.09E-21    | -0.489014849 | 3.92E-16    | 0.611351136  | 1.68E-26    |
| -0.516228462 | 4.34E-18    | -0.517046549 | 3.77E-18    | 0.241071117  | 0.000138736 |
| -0.276517277 | 1.12E-05    | -0.542476567 | 3.79E-20    | 0.265375423  | 2.57E-05    |
| 0.42333106   | 4.50E-12    | 0.464830963  | 1.55E-14    | -0.394179935 | 1.56E-10    |
| 0.109990595  | 0.085789859 | 0.382724042  | 5.74E-10    | 0.04001723   | 0.533011701 |
| 0.286487705  | 5.18E-06    | 0.225994651  | 0.000363129 | -0.217755793 | 0.000598561 |
| 0.286340664  | 5.24E-06    | 0.444163036  | 2.88E-13    | -0.113878421 | 0.07521425  |
| -0.476021855 | 2.93E-15    | -0.537624243 | 9.40E-20    | 0.305219976  | 1.12E-06    |
| -0.282558712 | 7.06E-06    | -0.381242244 | 6.76E-10    | 0.33279968   | 9.54E-08    |
| -0.563446524 | 6.31E-22    | -0.379935088 | 7.82E-10    | 0.224441777  | 0.000399554 |
| 0.578518648  | 2.76E-23    | 0.439320962  | 5.54E-13    | -0.222204534 | 0.000458027 |
| -0.38690539  | 3.59E-10    | -0.383534595 | 5.24E-10    | 0.146938261  | 0.021409309 |
| 0.373089157  | 1.65E-09    | 0.566384496  | 3.47E-22    | -0.076802657 | 0.231005084 |
| 0.489608906  | 3.56E-16    | 0.380853642  | 7.06E-10    | 0.036648357  | 0.568070325 |
| -0.44313957  | 3.31E-13    | -0.428474431 | 2.32E-12    | 0.123209655  | 0.054102105 |
| 0.420970917  | 6.08E-12    | 0.384608044  | 4.65E-10    | -0.271315744 | 1.66E-05    |
| -0.277529047 | 1.04E-05    | -0.325315299 | 1.91E-07    | 0.179502961  | 0.004829016 |
| 0.333529797  | 8.90E-08    | 0.306492787  | 1.00E-06    | -0.266992705 | 2.29E-05    |
| -0.521735615 | 1.66E-18    | -0.565411426 | 4.23E-22    | 0.522633068  | 1.42E-18    |
| -0.418340096 | 8.47E-12    | -0.336882257 | 6.48E-08    | 0.457515036  | 4.46E-14    |
| -0.436608982 | 7.97E-13    | -0.52077443  | 1.97E-18    | 0.241920153  | 0.000131174 |
| -0.253189954 | 6.12E-05    | -0.371408021 | 1.98E-09    | 0.425665945  | 3.34E-12    |
| -0.484666457 | 7.75E-16    | -0.311807186 | 6.35E-07    | 0.221467438  | 0.000478967 |
| -0.320520262 | 2.94E-07    | -0.472728823 | 4.81E-15    | 0.193767687  | 0.002316323 |
| -0.355954484 | 9.93E-09    | -0.388481898 | 3.00E-10    | 0.328239007  | 1.46E-07    |
| -0.520598708 | 2.03E-18    | -0.493257842 | 1.99E-16    | 0.430207822  | 1.85E-12    |



|              |             |              |             |              |             |
|--------------|-------------|--------------|-------------|--------------|-------------|
| -0.453027122 | 8.41E-14    | -0.391796118 | 2.05E-10    | 0.271924207  | 1.59E-05    |
| 0.399654632  | 8.23E-11    | 0.360595894  | 6.17E-09    | -0.151645919 | 0.017537153 |
| -0.584595104 | 7.46E-24    | -0.569979973 | 1.66E-22    | 0.453225219  | 8.18E-14    |
| 0.401400088  | 6.69E-11    | 0.435297738  | 9.49E-13    | 0.031785104  | 0.620532098 |
| -0.444938315 | 2.59E-13    | -0.496924965 | 1.10E-16    | 0.38302223   | 5.55E-10    |
| 0.40280293   | 5.67E-11    | 0.688591897  | 8.97E-36    | -0.435517407 | 9.21E-13    |
| -0.297359132 | 2.16E-06    | -0.390245272 | 2.45E-10    | 0.32047728   | 2.95E-07    |
| -0.525243479 | 8.93E-19    | -0.536351156 | 1.19E-19    | 0.439971063  | 5.08E-13    |
| -0.596089522 | 5.83E-25    | -0.358982064 | 7.29E-09    | 0.50549334   | 2.69E-17    |
| -0.446802411 | 2.00E-13    | -0.356806364 | 9.11E-09    | 0.365554639  | 3.68E-09    |
| -0.517318812 | 3.60E-18    | -0.453365973 | 8.02E-14    | 0.485011484  | 7.34E-16    |
| 0.485988113  | 6.30E-16    | 0.561602763  | 9.15E-22    | -0.263419245 | 2.97E-05    |
| 0.362847559  | 4.89E-09    | 0.205324712  | 0.001229668 | -0.205197313 | 0.001238515 |
| 0.438779369  | 5.96E-13    | 0.40825056   | 2.94E-11    | -0.312478056 | 5.99E-07    |
| -0.521249152 | 1.81E-18    | -0.537310187 | 9.96E-20    | 0.401607075  | 6.53E-11    |
| -0.26071414  | 3.60E-05    | -0.359324074 | 7.04E-09    | 0.27533329   | 1.23E-05    |
| -0.386873626 | 3.60E-10    | -0.424992762 | 3.64E-12    | 0.423767549  | 4.26E-12    |
| -0.58212284  | 1.27E-23    | -0.591049533 | 1.80E-24    | 0.182416243  | 0.004173529 |
| -0.494175279 | 1.72E-16    | -0.452893829 | 8.57E-14    | 0.416426034  | 1.08E-11    |
| -0.587075229 | 4.34E-24    | -0.578296227 | 2.89E-23    | 0.403770586  | 5.05E-11    |
| -0.457884773 | 4.23E-14    | -0.475504805 | 3.17E-15    | 0.437507881  | 7.07E-13    |
| -0.555080528 | 3.35E-21    | -0.478641304 | 1.96E-15    | 0.551231062  | 7.10E-21    |
| 0.689671357  | 6.35E-36    | 0.606362973  | 5.46E-26    | -0.370266667 | 2.23E-09    |
| 0.247479578  | 9.04E-05    | 0.169585279  | 0.007810585 | -0.440077169 | 5.01E-13    |
| -0.413357892 | 1.57E-11    | -0.481899055 | 1.19E-15    | 0.138885158  | 0.029756039 |
| 0.591796355  | 1.53E-24    | 0.313985401  | 5.25E-07    | -0.50235928  | 4.53E-17    |
| -0.675377084 | 5.49E-34    | -0.662961374 | 2.16E-32    | 0.389585275  | 2.65E-10    |
| -0.389223185 | 2.76E-10    | -0.330105405 | 1.23E-07    | 0.377722166  | 9.97E-10    |
| 0.210568616  | 0.000912096 | 0.385831068  | 4.05E-10    | -0.289603557 | 4.05E-06    |
| -0.392761151 | 1.84E-10    | -0.374460629 | 1.42E-09    | 0.109009948  | 0.088637872 |
| -0.227605267 | 0.000328627 | -0.365255948 | 3.80E-09    | 0.252956272  | 6.22E-05    |
| -0.424011613 | 4.13E-12    | -0.454891936 | 6.47E-14    | 0.241990457  | 0.000130566 |
| -0.249591267 | 7.83E-05    | -0.34421623  | 3.20E-08    | 0.310775482  | 6.94E-07    |
| 0.348775058  | 2.04E-08    | 0.266278583  | 2.41E-05    | -0.18196363  | 0.004269793 |
| 0.466743559  | 1.17E-14    | 0.342446781  | 3.80E-08    | -0.104668193 | 0.10216853  |
| -0.488885856 | 4.00E-16    | -0.552003436 | 6.11E-21    | 0.11505193   | 0.072238547 |
| 0.431846063  | 1.50E-12    | 0.193238204  | 0.002382548 | -0.282773761 | 6.94E-06    |
| -0.213164685 | 0.000784599 | -0.185965523 | 0.003483934 | 0.101484647  | 0.113090051 |
| 0.205865307  | 0.001192769 | 0.161867617  | 0.011167057 | -0.327817863 | 1.51E-07    |
| 0.38154605   | 6.54E-10    | 0.347251464  | 2.37E-08    | -0.273927795 | 1.37E-05    |

|              |             |              |             |              |             |
|--------------|-------------|--------------|-------------|--------------|-------------|
| -0.519221348 | 2.58E-18    | -0.484613039 | 7.81E-16    | 0.480023263  | 1.59E-15    |
| 0.376872791  | 1.09E-09    | 0.391814947  | 2.05E-10    | -0.215501099 | 0.000684125 |
| -0.219868831 | 0.000527466 | -0.220113031 | 0.000519774 | 0.175904636  | 0.005765603 |
| -0.604543674 | 8.35E-26    | -0.521111235 | 1.85E-18    | 0.325315808  | 1.91E-07    |
| 0.311871241  | 6.31E-07    | 0.492674062  | 2.19E-16    | -0.173040558 | 0.006624091 |
| -0.440365426 | 4.82E-13    | -0.34369922  | 3.36E-08    | 0.407843215  | 3.09E-11    |
| -0.55637407  | 2.59E-21    | -0.564110271 | 5.51E-22    | 0.336835011  | 6.51E-08    |
| 0.577173603  | 3.67E-23    | 0.428431011  | 2.34E-12    | -0.305584811 | 1.08E-06    |
| 0.457500817  | 4.46E-14    | 0.588878567  | 2.92E-24    | -0.269294508 | 1.93E-05    |
| 0.662971852  | 2.16E-32    | 0.713598454  | 1.98E-39    | -0.431058649 | 1.66E-12    |
| -0.507122145 | 2.05E-17    | -0.56435838  | 5.24E-22    | 0.203549112  | 0.001358359 |
| -0.263455678 | 2.96E-05    | -0.284619067 | 6.01E-06    | 0.166308843  | 0.009106764 |
| -0.514252169 | 6.11E-18    | -0.48884959  | 4.02E-16    | 0.117054524  | 0.067382222 |
| -0.38153483  | 6.55E-10    | -0.449779848 | 1.33E-13    | 0.182723908  | 0.004109215 |
| 0.640786792  | 1.01E-29    | 0.608758347  | 3.10E-26    | -0.570556115 | 1.47E-22    |
| 0.319663609  | 3.18E-07    | 0.247451831  | 9.06E-05    | -0.51202328  | 8.94E-18    |
| 0.320022951  | 3.08E-07    | 0.383749766  | 5.12E-10    | -0.36307272  | 4.77E-09    |
| 0.20691559   | 0.001123972 | 0.070419407  | 0.272219875 | -0.10918434  | 0.088125938 |
| 0.363292984  | 4.66E-09    | 0.373519235  | 1.57E-09    | -0.366382991 | 3.37E-09    |
| 0.429331485  | 2.08E-12    | 0.473705152  | 4.15E-15    | -0.416984597 | 1.00E-11    |
| 0.325218987  | 1.92E-07    | 0.370408674  | 2.20E-09    | -0.288453232 | 4.44E-06    |
| 0.42071129   | 6.28E-12    | 0.292863972  | 3.11E-06    | -0.49653742  | 1.17E-16    |
| -0.058384097 | 0.362844327 | -0.142185793 | 0.026047887 | 0.412856816  | 1.67E-11    |
| 0.481812654  | 1.21E-15    | 0.499946796  | 6.73E-17    | -0.396121362 | 1.25E-10    |
| 0.394825974  | 1.45E-10    | 0.268164372  | 2.10E-05    | -0.40359964  | 5.15E-11    |
| 0.304964886  | 1.14E-06    | 0.213998692  | 0.000747268 | -0.469167307 | 8.18E-15    |
| 0.411898454  | 1.88E-11    | 0.297899767  | 2.06E-06    | -0.490706917 | 2.99E-16    |
| 0.444106165  | 2.90E-13    | 0.357370154  | 8.60E-09    | -0.483122354 | 9.85E-16    |
| 0.201137385  | 0.001552954 | 0.25726184   | 4.60E-05    | -0.159560465 | 0.012391788 |
| 0.460236925  | 3.02E-14    | 0.379806943  | 7.93E-10    | -0.449132721 | 1.45E-13    |
| 0.397423369  | 1.07E-10    | 0.309523201  | 7.74E-07    | -0.470405366 | 6.81E-15    |
| 0.539544196  | 6.58E-20    | 0.648647722  | 1.21E-30    | -0.507253964 | 2.00E-17    |
| 0.44540921   | 2.42E-13    | 0.445023645  | 2.56E-13    | -0.356626729 | 9.27E-09    |
| 0.36192477   | 5.38E-09    | 0.251560224  | 6.84E-05    | -0.514215878 | 6.14E-18    |
| 0.513104955  | 7.43E-18    | 0.539856397  | 6.20E-20    | -0.337854398 | 5.91E-08    |
| 0.576683055  | 4.07E-23    | 0.550581043  | 8.06E-21    | -0.336346605 | 6.82E-08    |
| 0.24602677   | 9.97E-05    | 0.354379629  | 1.17E-08    | -0.382252063 | 6.05E-10    |
| 0.439979359  | 5.07E-13    | 0.587316924  | 4.12E-24    | -0.324708543 | 2.01E-07    |
| 0.334485227  | 8.14E-08    | 0.306900993  | 9.69E-07    | -0.343423523 | 3.46E-08    |
| 0.412966737  | 1.65E-11    | 0.294182432  | 2.80E-06    | -0.449220753 | 1.43E-13    |

|              |             |              |             |              |             |
|--------------|-------------|--------------|-------------|--------------|-------------|
| 0.466718711  | 1.17E-14    | 0.411192611  | 2.06E-11    | -0.353509067 | 1.27E-08    |
| 0.488886295  | 4.00E-16    | 0.415365499  | 1.23E-11    | -0.505555674 | 2.66E-17    |
| 0.468428679  | 9.13E-15    | 0.476952677  | 2.54E-15    | -0.35076569  | 1.68E-08    |
| 0.544962103  | 2.37E-20    | 0.481497476  | 1.27E-15    | -0.516791873 | 3.94E-18    |
| 0.531703748  | 2.79E-19    | 0.517630883  | 3.41E-18    | -0.534120718 | 1.79E-19    |
| 0.490903703  | 2.90E-16    | 0.441776582  | 3.98E-13    | -0.473333721 | 4.39E-15    |
| 0.435524429  | 9.21E-13    | 0.458930224  | 3.64E-14    | -0.375310682 | 1.30E-09    |
| 0.399703115  | 8.18E-11    | 0.426737787  | 2.91E-12    | -0.405688952 | 4.01E-11    |
| 0.469593649  | 7.68E-15    | 0.328594396  | 1.41E-07    | -0.504888601 | 2.98E-17    |
| 0.438552257  | 6.15E-13    | 0.348209777  | 2.16E-08    | -0.518884574 | 2.74E-18    |
| 0.299295802  | 1.84E-06    | 0.344644613  | 3.07E-08    | -0.304214382 | 1.22E-06    |
| 0.456170878  | 5.40E-14    | 0.564910212  | 4.69E-22    | -0.329521421 | 1.29E-07    |
| 0.319055183  | 3.35E-07    | 0.19312266   | 0.002397227 | -0.592068866 | 1.44E-24    |
| 0.373558058  | 1.57E-09    | 0.313701231  | 5.38E-07    | -0.401189008 | 6.86E-11    |
| 0.250523533  | 7.35E-05    | 0.222895437  | 0.000439173 | -0.334795265 | 7.90E-08    |
| 0.349519865  | 1.90E-08    | 0.313498548  | 5.48E-07    | -0.268173561 | 2.10E-05    |
| 0.250031371  | 7.60E-05    | 0.158511457  | 0.012986708 | -0.365027552 | 3.89E-09    |
| 0.342704233  | 3.71E-08    | 0.24620829   | 9.85E-05    | -0.355102753 | 1.08E-08    |
| 0.228744542  | 0.000306091 | 0.194357569  | 0.002244519 | -0.121142233 | 0.058297002 |
| -0.315945144 | 4.42E-07    | -0.359993094 | 6.57E-09    | 0.528920764  | 4.62E-19    |
| 0.219169746  | 0.000550072 | 0.124169152  | 0.052242052 | -0.437131942 | 7.43E-13    |
| 0.335859419  | 7.15E-08    | 0.34491072   | 2.99E-08    | -0.281172705 | 7.86E-06    |
| 0.406056986  | 3.84E-11    | 0.316485601  | 4.21E-07    | -0.444859541 | 2.61E-13    |
| 0.422026981  | 5.32E-12    | 0.327746997  | 1.52E-07    | -0.46941431  | 7.89E-15    |
| -0.034488786 | 0.591105983 | 0.023054722  | 0.719545909 | 0.222572856  | 0.000447884 |
| 0.438001966  | 6.62E-13    | 0.289646594  | 4.03E-06    | -0.651403465 | 5.67E-31    |
| 0.574731457  | 6.15E-23    | 0.499888011  | 6.80E-17    | -0.376016328 | 1.20E-09    |
| 0.44023221   | 4.90E-13    | 0.485510788  | 6.79E-16    | -0.400627597 | 7.34E-11    |
| 0.360265737  | 6.38E-09    | 0.237623331  | 0.000173835 | -0.480461424 | 1.49E-15    |
| 0.716135037  | 8.00E-40    | 0.430847906  | 1.71E-12    | -0.622635573 | 1.07E-27    |
| 0.440375178  | 4.81E-13    | 0.433457189  | 1.21E-12    | -0.444127117 | 2.89E-13    |
| 0.449676531  | 1.34E-13    | 0.419118222  | 7.68E-12    | -0.361347422 | 5.71E-09    |
| 0.489649939  | 3.54E-16    | 0.280901877  | 8.02E-06    | -0.376620616 | 1.12E-09    |
| 0.281518641  | 7.65E-06    | 0.279459479  | 8.97E-06    | -0.556161019 | 2.70E-21    |
| -0.459306075 | 3.45E-14    | -0.376273789 | 1.17E-09    | 0.312258216  | 6.10E-07    |
| 0.470504707  | 6.71E-15    | 0.490749593  | 2.97E-16    | -0.107511252 | 0.093136189 |
| 0.563756396  | 5.92E-22    | 0.39343773   | 1.70E-10    | -0.211434825 | 0.000867576 |
| 0.182196791  | 0.004219956 | 0.161922862  | 0.01113909  | -0.473966237 | 3.99E-15    |
| 0.488368416  | 4.34E-16    | 0.369766495  | 2.36E-09    | -0.47811365  | 2.13E-15    |
| 0.59117588   | 1.75E-24    | 0.553116493  | 4.92E-21    | -0.448322547 | 1.62E-13    |

|             |             |             |             |              |             |
|-------------|-------------|-------------|-------------|--------------|-------------|
| 0.561656639 | 9.05E-22    | 0.430547067 | 1.77E-12    | -0.518891521 | 2.73E-18    |
| 0.125816595 | 0.049172434 | 0.090494168 | 0.15791673  | -0.244953405 | 0.000107196 |
| 0.367997001 | 2.84E-09    | 0.308009455 | 8.81E-07    | -0.407977211 | 3.04E-11    |
| 0.356340464 | 9.55E-09    | 0.202983318 | 0.00140189  | -0.313708855 | 5.38E-07    |
| 0.326414406 | 1.72E-07    | 0.310767858 | 6.95E-07    | -0.253742813 | 5.89E-05    |
| 0.478384958 | 2.04E-15    | 0.446558307 | 2.07E-13    | -0.255631156 | 5.16E-05    |
| 0.261154701 | 3.49E-05    | 0.235245874 | 0.000202699 | -0.473838337 | 4.07E-15    |
| 0.775909076 | 1.58E-50    | 0.672120843 | 1.46E-33    | -0.600111588 | 2.33E-25    |
| 0.620640395 | 1.76E-27    | 0.516278759 | 4.31E-18    | -0.471669415 | 5.64E-15    |
| 0.415106205 | 1.27E-11    | 0.285763094 | 5.49E-06    | -0.545449271 | 2.16E-20    |
| 0.418868608 | 7.92E-12    | 0.313674238 | 5.39E-07    | -0.44369302  | 3.07E-13    |
| 0.547520621 | 1.45E-20    | 0.306294464 | 1.02E-06    | -0.589829233 | 2.37E-24    |
| 0.419262514 | 7.54E-12    | 0.362239983 | 5.20E-09    | -0.518204689 | 3.08E-18    |
| 0.097211914 | 0.129160255 | 0.03538378  | 0.581507534 | -0.263418382 | 2.97E-05    |
| 0.620175468 | 1.97E-27    | 0.565700263 | 3.99E-22    | -0.535332634 | 1.44E-19    |
| 0.486953243 | 5.42E-16    | 0.504049093 | 3.42E-17    | -0.477197266 | 2.45E-15    |
| 0.268644096 | 2.03E-05    | 0.14928189  | 0.019397824 | -0.544830537 | 2.43E-20    |
| 0.433248385 | 1.24E-12    | 0.347703248 | 2.27E-08    | -0.559243523 | 1.47E-21    |
| 0.435107462 | 9.73E-13    | 0.280927022 | 8.01E-06    | -0.478046392 | 2.15E-15    |
| 0.240382868 | 0.000145163 | 0.221728552 | 0.000471449 | -0.359866101 | 6.65E-09    |
| 0.16420144  | 0.010038127 | 0.222004794 | 0.000463616 | -0.174399535 | 0.006203446 |
| 0.553852068 | 4.26E-21    | 0.283213408 | 6.70E-06    | -0.631563679 | 1.12E-28    |
| 0.37123525  | 2.01E-09    | 0.360707398 | 6.10E-09    | -0.454761828 | 6.59E-14    |
| 0.549354848 | 1.02E-20    | 0.67325171  | 1.04E-33    | -0.327311789 | 1.59E-07    |
| 0.516361855 | 4.24E-18    | 0.465669807 | 1.37E-14    | -0.588638869 | 3.08E-24    |
| 0.267986976 | 2.13E-05    | 0.15849366  | 0.012997014 | -0.379275341 | 8.41E-10    |
| 0.420169696 | 6.73E-12    | 0.276677444 | 1.11E-05    | -0.256695816 | 4.79E-05    |
| 0.364068695 | 4.30E-09    | 0.259432359 | 3.95E-05    | -0.498935806 | 7.95E-17    |
| 0.278064326 | 9.98E-06    | 0.223941727 | 0.000411987 | -0.50735782  | 1.97E-17    |
| 0.508530557 | 1.62E-17    | 0.503714107 | 3.62E-17    | -0.271432171 | 1.65E-05    |
| 0.506405429 | 2.31E-17    | 0.498701223 | 8.26E-17    | -0.542909236 | 3.50E-20    |
| 0.365599816 | 3.66E-09    | 0.275083137 | 1.25E-05    | -0.374454842 | 1.42E-09    |
| 0.441737867 | 4.00E-13    | 0.409703968 | 2.47E-11    | -0.562767552 | 7.23E-22    |
| 0.466575921 | 1.20E-14    | 0.429168109 | 2.12E-12    | -0.494777197 | 1.56E-16    |
| 0.350459602 | 1.73E-08    | 0.459922436 | 3.16E-14    | -0.364562708 | 4.08E-09    |
| 0.321777191 | 2.63E-07    | 0.401215177 | 6.84E-11    | -0.215529546 | 0.000682978 |
| 0.091548955 | 0.153107348 | 0.042378958 | 0.50909984  | 0.220422973  | 0.000510161 |
| 0.679839398 | 1.40E-34    | 0.590319646 | 2.12E-24    | -0.619518077 | 2.32E-27    |
| 0.523021288 | 1.32E-18    | 0.685848749 | 2.14E-35    | -0.424190242 | 4.03E-12    |
| 0.295017211 | 2.61E-06    | 0.298453722 | 1.97E-06    | -0.40707385  | 3.39E-11    |

|              |             |              |             |              |             |
|--------------|-------------|--------------|-------------|--------------|-------------|
| 0.477045468  | 2.51E-15    | 0.332315662  | 9.98E-08    | -0.329274202 | 1.32E-07    |
| 0.516249349  | 4.33E-18    | 0.628766425  | 2.29E-28    | -0.30782285  | 8.95E-07    |
| 0.359703597  | 6.77E-09    | 0.222144478  | 0.0004597   | -0.562468436 | 7.68E-22    |
| 0.5657638    | 3.94E-22    | 0.432671049  | 1.34E-12    | -0.449319116 | 1.41E-13    |
| -0.395615794 | 1.32E-10    | -0.33115504  | 1.11E-07    | 0.555198063  | 3.27E-21    |
| 0.420779453  | 6.23E-12    | 0.42235765   | 5.10E-12    | -0.259828087 | 3.84E-05    |
| 0.482870902  | 1.02E-15    | 0.338226349  | 5.70E-08    | -0.4371669   | 7.40E-13    |
| 0.480939953  | 1.38E-15    | 0.459180181  | 3.51E-14    | -0.499074519 | 7.77E-17    |
| 0.578982562  | 2.50E-23    | 0.57169736   | 1.16E-22    | -0.456321792 | 5.28E-14    |
| 0.522701084  | 1.40E-18    | 0.468190067  | 9.45E-15    | -0.339885806 | 4.87E-08    |
| 0.479062025  | 1.84E-15    | 0.381366868  | 6.67E-10    | -0.538916461 | 7.39E-20    |
| 0.631718896  | 1.08E-28    | 0.492097883  | 2.40E-16    | -0.641016911 | 9.49E-30    |
| 0.556200061  | 2.68E-21    | 0.514504697  | 5.85E-18    | -0.631545699 | 1.13E-28    |
| -0.237065783 | 0.000180237 | -0.291994062 | 3.34E-06    | 0.478921155  | 1.88E-15    |
| 0.4988877    | 8.01E-17    | 0.396510881  | 1.19E-10    | -0.55881177  | 1.60E-21    |
| 0.533850383  | 1.89E-19    | 0.418097279  | 8.73E-12    | -0.513487013 | 6.96E-18    |
| -0.442619465 | 3.55E-13    | -0.393041562 | 1.78E-10    | 0.700231986  | 1.99E-37    |
| 0.530068696  | 3.75E-19    | 0.513378039  | 7.09E-18    | -0.59171112  | 1.56E-24    |
| 0.359111018  | 7.19E-09    | 0.274778193  | 1.28E-05    | -0.4324027   | 1.39E-12    |
| 0.33977912   | 4.92E-08    | 0.143325803  | 0.024862894 | -0.247285995 | 9.16E-05    |
| 0.564257955  | 5.35E-22    | 0.456191287  | 5.38E-14    | -0.526179713 | 7.55E-19    |
| 0.341502914  | 4.16E-08    | 0.213715076  | 0.000759775 | -0.519358959 | 2.52E-18    |
| 0.581068173  | 1.60E-23    | 0.378769755  | 8.89E-10    | -0.473152387 | 4.51E-15    |
| 0.50574582   | 2.58E-17    | 0.519025939  | 2.67E-18    | -0.425966404 | 3.21E-12    |
| 0.059285119  | 0.355472633 | 0.003651034  | 0.954660184 | -0.201379467 | 0.001532328 |
| 0.449593106  | 1.36E-13    | 0.281298444  | 7.78E-06    | -0.387937997 | 3.19E-10    |
| 0.555837687  | 2.88E-21    | 0.511402614  | 9.94E-18    | -0.458487388 | 3.88E-14    |
| 0.598192539  | 3.61E-25    | 0.419698126  | 7.14E-12    | -0.624694299 | 6.41E-28    |
| 0.392782609  | 1.83E-10    | 0.328332287  | 1.44E-07    | -0.332152336 | 1.01E-07    |
| 0.44857622   | 1.57E-13    | 0.344684805  | 3.06E-08    | -0.468822983 | 8.61E-15    |
| 0.346237388  | 2.62E-08    | 0.271029479  | 1.70E-05    | -0.455131297 | 6.25E-14    |
| 0.203369813  | 0.001372018 | 0.184868643  | 0.003685157 | -0.331787747 | 1.05E-07    |
| 0.583689964  | 9.08E-24    | 0.562709506  | 7.32E-22    | -0.443983949 | 2.95E-13    |
| 0.506167765  | 2.40E-17    | 0.379874179  | 7.87E-10    | -0.584986889 | 6.85E-24    |
| 0.343732586  | 3.35E-08    | 0.326337926  | 1.74E-07    | -0.413020902 | 1.64E-11    |
| 0.546004911  | 1.94E-20    | 0.523635755  | 1.19E-18    | -0.43738571  | 7.18E-13    |
| 0.320770311  | 2.88E-07    | 0.238884454  | 0.000160131 | -0.439571922 | 5.36E-13    |
| 0.319580896  | 3.20E-07    | 0.261995443  | 3.29E-05    | -0.543419832 | 3.17E-20    |
| 0.455164089  | 6.22E-14    | 0.32677394   | 1.67E-07    | -0.44721752  | 1.89E-13    |
| 0.188258315  | 0.003095072 | 0.108088632  | 0.091382096 | -0.469138401 | 8.22E-15    |

|             |          |             |          |              |             |
|-------------|----------|-------------|----------|--------------|-------------|
| 0.500074652 | 6.59E-17 | 0.413701855 | 1.51E-11 | -0.553261267 | 4.78E-21    |
| 0.555521834 | 3.07E-21 | 0.499866379 | 6.82E-17 | -0.291928523 | 3.36E-06    |
| 0.462787493 | 2.09E-14 | 0.362872238 | 4.87E-09 | -0.218251921 | 0.000581114 |
| 0.347079637 | 2.42E-08 | 0.273224712 | 1.44E-05 | -0.405325978 | 4.19E-11    |

| MMred        | p.MMred     | MMturquoise  | p.MMturquoise | MMgrey       | p.MMgrey    |
|--------------|-------------|--------------|---------------|--------------|-------------|
| 0.6500823    | 8.17E-31    | 0.644118714  | 4.14E-30      | -0.312825286 | 5.81E-07    |
| -0.088561402 | 0.167023082 | -0.093160164 | 0.145975814   | -0.153252021 | 0.016363541 |
| 0.089899477  | 0.160677937 | 0.167473521  | 0.008625643   | -0.139467711 | 0.029070541 |
| 0.166733287  | 0.008928739 | 0.21082067   | 0.000898929   | -0.035236222 | 0.583085038 |
| 0.338140015  | 5.75E-08    | 0.428629405  | 2.28E-12      | -0.084412744 | 0.18788458  |
| 0.03140384   | 0.624732162 | 0.045462749  | 0.478739267   | -0.188350633 | 0.003080273 |
| 0.381894851  | 6.29E-10    | 0.467812314  | 1.00E-14      | -0.219684646 | 0.000533337 |
| -0.053814258 | 0.401678909 | -0.017444669 | 0.785870744   | 0.089533574  | 0.162394785 |
| 0.31236833   | 6.05E-07    | 0.383586048  | 5.21E-10      | -0.318846048 | 3.42E-07    |
| 0.288044408  | 4.58E-06    | 0.341811331  | 4.04E-08      | -0.276302029 | 1.14E-05    |
| 0.13587743   | 0.033519059 | 0.088914594  | 0.165330348   | -0.23209302  | 0.000247904 |
| 0.261331309  | 3.45E-05    | 0.419943666  | 6.92E-12      | -0.064209521 | 0.316859969 |
| 0.291114813  | 3.58E-06    | 0.185950187  | 0.003486677   | -0.169778488 | 0.007739552 |
| 0.153724299  | 0.016031751 | 0.29274898   | 3.14E-06      | -0.25672481  | 4.78E-05    |
| 0.280245055  | 8.44E-06    | 0.569198824  | 1.95E-22      | -0.44101247  | 4.41E-13    |
| 0.359600581  | 6.84E-09    | 0.464430783  | 1.64E-14      | -0.395178332 | 1.39E-10    |
| 0.196456633  | 0.002005143 | 0.271749887  | 1.61E-05      | -0.217879925 | 0.000594151 |
| -0.265280773 | 2.59E-05    | -0.03322169  | 0.604817458   | -0.352757868 | 1.37E-08    |
| 0.024672052  | 0.700784074 | 0.106366648  | 0.096692851   | -0.159353927 | 0.012506988 |
| 0.083655094  | 0.191892321 | 0.148875557  | 0.019734337   | -0.270069268 | 1.82E-05    |
| 0.375172491  | 1.32E-09    | 0.43378199   | 1.16E-12      | -0.327151288 | 1.61E-07    |
| 0.492898676  | 2.11E-16    | 0.498274287  | 8.85E-17      | -0.3906423   | 2.35E-10    |
| 0.127188425  | 0.046732507 | 0.266358847  | 2.40E-05      | -0.376746851 | 1.11E-09    |
| -0.075651661 | 0.23809112  | -0.141149117 | 0.027167272   | -0.029037426 | 0.651068278 |
| 0.055576846  | 0.386415535 | 0.060370414  | 0.346718951   | -0.19597095  | 0.002058361 |
| 0.271109332  | 1.69E-05    | 0.189826186  | 0.00285227    | -0.242465924 | 0.000126519 |
| 0.815392717  | 1.29E-59    | 0.605487682  | 6.70E-26      | -0.26617521  | 2.43E-05    |
| 0.039155416  | 0.541875794 | 0.073551132  | 0.251413097   | -0.222202134 | 0.000458093 |
| 0.151505714  | 0.017643    | 0.376029861  | 1.20E-09      | -0.281657338 | 7.57E-06    |
| 0.555536977  | 3.06E-21    | 0.520178133  | 2.18E-18      | -0.307039522 | 9.57E-07    |
| 0.287732737  | 4.70E-06    | 0.35827591   | 7.83E-09      | -0.215852436 | 0.000670088 |
| -0.280646103 | 8.18E-06    | -0.382128594 | 6.13E-10      | 0.31389614   | 5.29E-07    |
| 0.291823938  | 3.39E-06    | 0.235965148  | 0.000193526   | -0.214535221 | 0.000724126 |
| 0.238322     | 0.000166113 | 0.148464662  | 0.020079768   | -0.114407221 | 0.07386127  |
| 0.636175297  | 3.40E-29    | 0.59182985   | 1.52E-24      | -0.299709427 | 1.78E-06    |
| 0.46362477   | 1.85E-14    | 0.452590817  | 8.95E-14      | -0.2518419   | 6.71E-05    |
| 0.234352019  | 0.000214664 | 0.219910221  | 0.000526155   | -0.082188517 | 0.19982692  |
| 0.05948361   | 0.353861389 | -0.031730472 | 0.621133184   | -0.055181845 | 0.389805151 |
| 0.650185982  | 7.94E-31    | 0.685799832  | 2.18E-35      | -0.448564109 | 1.57E-13    |

|              |             |              |             |              |             |
|--------------|-------------|--------------|-------------|--------------|-------------|
| 0.686763968  | 1.60E-35    | 0.481636844  | 1.24E-15    | -0.167985392 | 0.008421432 |
| -0.011392425 | 0.859183618 | 0.117271587  | 0.066872272 | -0.171234744 | 0.00722242  |
| 0.597104409  | 4.63E-25    | 0.263148083  | 3.02E-05    | -0.075439851 | 0.239411559 |
| 0.291466242  | 3.48E-06    | 0.278029813  | 1.00E-05    | -0.36807048  | 2.82E-09    |
| -0.048148677 | 0.453117965 | 0.052023282  | 0.417550644 | -0.272594275 | 1.51E-05    |
| 0.336849073  | 6.51E-08    | 0.427853396  | 2.52E-12    | -0.269715857 | 1.87E-05    |
| 0.423674974  | 4.31E-12    | 0.619642408  | 2.25E-27    | -0.411137444 | 2.07E-11    |
| 0.221417102  | 0.000480429 | 0.408721919  | 2.78E-11    | -0.238299919 | 0.000166352 |
| 0.468816771  | 8.62E-15    | 0.655718322  | 1.70E-31    | -0.341457829 | 4.18E-08    |
| 0.201671808  | 0.001507755 | 0.186760674  | 0.003344334 | -0.136960137 | 0.032120317 |
| 0.398874538  | 9.02E-11    | 0.295341982  | 2.54E-06    | -0.291536515 | 3.46E-06    |
| 0.2765734    | 1.12E-05    | 0.516970289  | 3.82E-18    | -0.327581564 | 1.55E-07    |
| 0.596697039  | 5.08E-25    | 0.733769416  | 1.12E-42    | -0.499834353 | 6.86E-17    |
| 0.456808979  | 4.93E-14    | 0.632942287  | 7.87E-29    | -0.402671854 | 5.76E-11    |
| 0.609831568  | 2.41E-26    | 0.733795391  | 1.11E-42    | -0.510374602 | 1.18E-17    |
| 0.367972741  | 2.85E-09    | 0.441717734  | 4.01E-13    | -0.27461294  | 1.30E-05    |
| 0.491766515  | 2.53E-16    | 0.382583369  | 5.83E-10    | -0.149074246 | 0.019569161 |
| -0.436716204 | 7.86E-13    | -0.529454523 | 4.19E-19    | 0.172183453  | 0.006902325 |
| 0.410348615  | 2.28E-11    | 0.342040094  | 3.95E-08    | -0.147256342 | 0.021126133 |
| 0.397983593  | 1.00E-10    | 0.490416492  | 3.14E-16    | -0.170084311 | 0.007628295 |
| 0.438753646  | 5.98E-13    | 0.565167809  | 4.45E-22    | -0.55769096  | 2.00E-21    |
| 0.374733614  | 1.38E-09    | 0.485057393  | 7.29E-16    | -0.401348263 | 6.74E-11    |
| 0.49971437   | 7.00E-17    | 0.514076155  | 6.29E-18    | -0.321785452 | 2.62E-07    |
| 0.094348891  | 0.14087835  | 0.140799396  | 0.027554089 | -0.147666363 | 0.020765896 |
| -0.184926588 | 0.00367427  | 0.027479545  | 0.668648151 | -0.274025415 | 1.36E-05    |
| 0.358158039  | 7.93E-09    | 0.304869637  | 1.15E-06    | -0.325379885 | 1.89E-07    |
| 0.107632573  | 0.092765403 | 0.078660887  | 0.219881654 | -0.215136081 | 0.000698996 |
| 0.286090638  | 5.35E-06    | 0.237667151  | 0.000173341 | -0.153370281 | 0.016279902 |
| 0.003256278  | 0.959557971 | -0.208971107 | 0.000999765 | 0.272486222  | 1.52E-05    |
| 0.39956209   | 8.32E-11    | 0.187635926  | 0.003196541 | -0.283312821 | 6.65E-06    |
| -0.350331685 | 1.75E-08    | -0.374690806 | 1.39E-09    | 0.133473761  | 0.036810332 |
| -0.080108553 | 0.211484536 | -0.067873019 | 0.289978658 | 0.204746092  | 0.001270321 |
| 0.507538004  | 1.91E-17    | 0.364265186  | 4.21E-09    | -0.268130169 | 2.10E-05    |
| 0.118808215  | 0.063351871 | 0.102607457  | 0.109138252 | -0.238359083 | 0.000165713 |
| 0.31244383   | 6.01E-07    | 0.451851028  | 9.93E-14    | -0.385165001 | 4.37E-10    |
| 0.285254676  | 5.71E-06    | 0.264100381  | 2.82E-05    | -0.390845679 | 2.29E-10    |
| 0.062394159  | 0.330763817 | 0.226432638  | 0.000353428 | -0.246507633 | 9.66E-05    |
| 0.285484706  | 5.61E-06    | 0.434566395  | 1.05E-12    | -0.105948977 | 0.098017264 |
| 0.542171392  | 4.02E-20    | 0.578149788  | 2.98E-23    | -0.471007094 | 6.22E-15    |
| 0.042927437  | 0.503627658 | 0.126893408  | 0.047248495 | -0.215138297 | 0.000698904 |



|              |             |              |             |              |             |
|--------------|-------------|--------------|-------------|--------------|-------------|
| 0.312559809  | 5.95E-07    | 0.197312523  | 0.001914406 | -0.133229673 | 0.037159358 |
| 0.342408791  | 3.81E-08    | 0.216512844  | 0.000644421 | -0.033527478 | 0.601495505 |
| -0.122229679 | 0.056058222 | 0.011503516  | 0.85782494  | -0.309317759 | 7.87E-07    |
| 0.172194255  | 0.006898754 | 0.013001895  | 0.839541774 | -0.076812282 | 0.230946465 |
| 0.028391785  | 0.658331321 | 0.04857187   | 0.449152436 | -0.127560718 | 0.046088097 |
| 0.444206151  | 2.86E-13    | 0.614469648  | 7.93E-27    | -0.425983444 | 3.21E-12    |
| 0.205196941  | 0.001238541 | 0.210194561  | 0.000931964 | -0.198178048 | 0.001826472 |
| 0.263146635  | 3.02E-05    | 0.142636493  | 0.025573726 | 0.001093147  | 0.986418302 |
| 0.313225866  | 5.61E-07    | 0.260539204  | 3.65E-05    | -0.14553989  | 0.022693529 |
| 0.359099524  | 7.20E-09    | 0.231839814  | 0.000251915 | -0.132998853 | 0.037491984 |
| 0.173140223  | 0.006592397 | 0.387564901  | 3.33E-10    | -0.317597397 | 3.82E-07    |
| 0.56675614   | 3.22E-22    | 0.414722001  | 1.33E-11    | -0.203827482 | 0.0013374   |
| 0.174492385  | 0.006175597 | 0.405241122  | 4.23E-11    | -0.263013668 | 3.05E-05    |
| 0.050927208  | 0.427442657 | 0.209875396  | 0.000949231 | -0.257243558 | 4.61E-05    |
| 0.633594077  | 6.65E-29    | 0.497182227  | 1.06E-16    | -0.222321255 | 0.00045479  |
| 0.23108729   | 0.000264196 | 0.358068916  | 8.00E-09    | -0.323839121 | 2.18E-07    |
| 0.582603663  | 1.15E-23    | 0.382448636  | 5.91E-10    | -0.1121852   | 0.079682309 |
| 0.117150365  | 0.067156669 | -0.062013659 | 0.333727055 | 0.001385752  | 0.98278336  |
| 0.586944036  | 4.47E-24    | 0.517427148  | 3.53E-18    | -0.389839324 | 2.57E-10    |
| 0.009590647  | 0.881275019 | -0.061902691 | 0.334594441 | -0.030076934 | 0.639443582 |
| 0.71686711   | 6.15E-40    | 0.459502821  | 3.35E-14    | -0.198959717 | 0.001750245 |
| -0.32366992  | 2.21E-07    | -0.490844039 | 2.93E-16    | 0.414351018  | 1.39E-11    |
| 0.606917295  | 4.79E-26    | 0.421786094  | 5.48E-12    | 0.013514779  | 0.833302791 |
| 0.216283022  | 0.000653248 | 0.205173202  | 0.001240196 | -0.165919112 | 0.009272995 |
| 0.428273194  | 2.38E-12    | 0.318735165  | 3.45E-07    | -0.220738574 | 0.000500542 |
| 0.630563073  | 1.45E-28    | 0.827701184  | 6.60E-63    | -0.43339722  | 1.22E-12    |
| 0.523353906  | 1.25E-18    | 0.502611667  | 4.34E-17    | -0.083758077 | 0.191343932 |
| 0.658534252  | 7.69E-32    | 0.576385773  | 4.34E-23    | -0.38036704  | 7.45E-10    |
| 0.627373436  | 3.27E-28    | 0.504041266  | 3.43E-17    | -0.130906807 | 0.040623214 |
| 0.694223565  | 1.45E-36    | 0.368222348  | 2.78E-09    | -0.203479803 | 0.001363624 |
| 0.511315724  | 1.01E-17    | 0.394725048  | 1.47E-10    | -0.220456984 | 0.000509117 |
| 0.701689521  | 1.22E-37    | 0.645822555  | 2.61E-30    | -0.361023985 | 5.90E-09    |
| 0.236250545  | 0.000189995 | 0.353183266  | 1.31E-08    | -0.488393025 | 4.32E-16    |
| 0.441232909  | 4.28E-13    | 0.450082775  | 1.27E-13    | -0.163873332 | 0.010190478 |
| 0.336483176  | 6.74E-08    | 0.158488519  | 0.012999993 | -0.223075546 | 0.000434378 |
| 0.297008578  | 2.22E-06    | 0.291450163  | 3.49E-06    | -0.07117112  | 0.267121868 |
| 0.35464884   | 1.13E-08    | 0.553622296  | 4.46E-21    | -0.206581203 | 0.00114547  |
| 0.138847164  | 0.029801223 | 0.281637782  | 7.58E-06    | -0.284385105 | 6.12E-06    |
| -0.125065808 | 0.050552167 | -0.187786889 | 0.003171657 | -0.116394972 | 0.068951266 |
| 0.389284575  | 2.74E-10    | 0.328590877  | 1.41E-07    | -0.315553843 | 4.57E-07    |

|              |             |              |             |              |             |
|--------------|-------------|--------------|-------------|--------------|-------------|
| 0.355800665  | 1.01E-08    | 0.381351571  | 6.68E-10    | -0.297205339 | 2.18E-06    |
| 0.340224755  | 4.71E-08    | 0.149801982  | 0.018974378 | -0.124249862 | 0.052088044 |
| 0.28026716   | 8.43E-06    | 0.199813742  | 0.001670292 | -0.350726906 | 1.68E-08    |
| 0.02856972   | 0.656326427 | 0.286399659  | 5.22E-06    | -0.032325997 | 0.614594587 |
| 0.626243691  | 4.34E-28    | 0.696109257  | 7.82E-37    | -0.431299711 | 1.61E-12    |
| -0.251633443 | 6.81E-05    | -0.224681099 | 0.000393728 | 0.378117172  | 9.55E-10    |
| 0.043202025  | 0.500899728 | -0.027600531 | 0.667276246 | -0.245566471 | 0.000102879 |
| 0.565357141  | 4.28E-22    | 0.481701896  | 1.23E-15    | -0.280629799 | 8.19E-06    |
| 0.169294841  | 0.007918455 | 0.15069304   | 0.018267557 | -0.269699498 | 1.87E-05    |
| 0.495863981  | 1.31E-16    | 0.517505711  | 3.48E-18    | -0.342784913 | 3.68E-08    |
| 0.284928232  | 5.86E-06    | 0.32275811   | 2.40E-07    | -0.141072365 | 0.027251765 |
| 0.497402653  | 1.02E-16    | 0.404648011  | 4.54E-11    | -0.285474556 | 5.62E-06    |
| 0.695141898  | 1.07E-36    | 0.525598968  | 8.38E-19    | -0.312796522 | 5.82E-07    |
| 0.013098961  | 0.838360228 | -0.114002523 | 0.074894932 | -0.081069633 | 0.20603862  |
| 0.38786158   | 3.22E-10    | 0.322248624  | 2.52E-07    | -0.435391474 | 9.37E-13    |
| -0.311404706 | 6.57E-07    | -0.279508637 | 8.93E-06    | 0.286723868  | 5.09E-06    |
| 0.220190154  | 0.000517367 | 0.156731194  | 0.014053932 | -0.217393561 | 0.000611604 |
| 0.571427169  | 1.23E-22    | 0.207933027  | 0.001060821 | -0.092796199 | 0.147564283 |
| 0.26218362   | 3.24E-05    | 0.305302241  | 1.11E-06    | -0.319824064 | 3.13E-07    |
| 0.21949873   | 0.000539324 | 0.37090278   | 2.09E-09    | -0.256565078 | 4.83E-05    |
| 0.414009314  | 1.45E-11    | 0.697621312  | 4.74E-37    | -0.306490366 | 1.00E-06    |
| 0.546597452  | 1.73E-20    | 0.499204174  | 7.60E-17    | -0.166689682 | 0.008946885 |
| 0.596939343  | 4.80E-25    | 0.461196917  | 2.63E-14    | -0.241425583 | 0.00013553  |
| 0.39828149   | 9.67E-11    | 0.601833368  | 1.57E-25    | -0.319657565 | 3.18E-07    |
| 0.458115224  | 4.09E-14    | 0.430508192  | 1.78E-12    | -0.265979449 | 2.46E-05    |
| -0.072039608 | 0.261313618 | 0.132121863  | 0.038778832 | -0.565336767 | 4.30E-22    |
| -0.038781988 | 0.545739226 | 0.014321158  | 0.823514769 | -0.249684607 | 7.78E-05    |
| 0.195376298  | 0.002125271 | 0.459655818  | 3.28E-14    | -0.23931403  | 0.000155699 |
| 0.782634612  | 6.12E-52    | 0.468197581  | 9.44E-15    | -0.238974022 | 0.000159197 |
| 0.197560389  | 0.001888837 | 0.204786151  | 0.001267467 | -0.269092535 | 1.96E-05    |
| 0.486309415  | 5.99E-16    | 0.162124473  | 0.011037548 | -0.072415067 | 0.258829708 |
| 0.178711384  | 0.005022435 | 0.380017214  | 7.75E-10    | -0.313011325 | 5.72E-07    |
| -0.090579556 | 0.157523218 | -0.182105186 | 0.004239474 | -0.125492654 | 0.049763843 |
| 0.448533793  | 1.58E-13    | 0.361322516  | 5.72E-09    | -0.437457986 | 7.12E-13    |
| 0.031029307  | 0.628869919 | 0.042077314  | 0.512122494 | -0.116532812 | 0.068620911 |
| 0.556402684  | 2.58E-21    | 0.491992445  | 2.44E-16    | -0.342033945 | 3.95E-08    |
| 0.21615595   | 0.000658177 | 0.23356591   | 0.000225728 | -0.269992616 | 1.83E-05    |
| 0.307447123  | 9.24E-07    | 0.444554477  | 2.73E-13    | -0.28876444  | 4.33E-06    |
| 0.567821509  | 2.58E-22    | 0.452972477  | 8.48E-14    | -0.20063066  | 0.001596953 |
| 0.169878756  | 0.007702917 | 0.341744835  | 4.07E-08    | -0.215678977 | 0.000676985 |

|              |             |              |             |              |            |
|--------------|-------------|--------------|-------------|--------------|------------|
| 0.053061038  | 0.408309683 | 0.126269497  | 0.048355419 | -0.136299068 | 0.03296831 |
| -0.143765232 | 0.024418676 | -0.431727549 | 1.52E-12    | 0.348128829  | 2.18E-08   |
| -0.284120255 | 6.25E-06    | -0.283119988 | 6.75E-06    | 0.273596141  | 1.40E-05   |
| 0.198535078  | 0.001791286 | -0.162410927 | 0.010894682 | 0.550308233  | 8.49E-21   |
| -0.194675417 | 0.002206675 | -0.547436366 | 1.48E-20    | 0.515306459  | 5.09E-18   |
| -0.356549659 | 9.35E-09    | -0.731355306 | 2.83E-42    | 0.385781037  | 4.07E-10   |
| -0.073175492 | 0.253848915 | -0.357249777 | 8.70E-09    | 0.270392303  | 1.78E-05   |
| -0.239102503 | 0.000157867 | -0.594617059 | 8.12E-25    | 0.381397759  | 6.65E-10   |
| -0.311923139 | 6.28E-07    | -0.661472344 | 3.32E-32    | 0.285137874  | 5.77E-06   |
| -0.10101491  | 0.114776202 | -0.38722679  | 3.46E-10    | 0.532824213  | 2.27E-19   |
| -0.375457538 | 1.28E-09    | -0.588814341 | 2.96E-24    | 0.540564093  | 5.43E-20   |
| -0.291282383 | 3.54E-06    | -0.516019216 | 4.50E-18    | 0.369577074  | 2.40E-09   |
| -0.474949905 | 3.44E-15    | -0.827006445 | 1.03E-62    | 0.539906205  | 6.15E-20   |
| -0.219288007 | 0.000546186 | -0.561449604 | 9.43E-22    | 0.50450729   | 3.17E-17   |
| -0.137940152 | 0.030897414 | -0.493842192 | 1.81E-16    | 0.342530457  | 3.77E-08   |
| -0.2730951   | 1.45E-05    | -0.586588075 | 4.83E-24    | 0.611867731  | 1.48E-26   |
| -0.103845979 | 0.104905952 | -0.433913016 | 1.14E-12    | 0.6431634    | 5.35E-30   |
| -0.140409781 | 0.027990581 | -0.569142311 | 1.97E-22    | 0.63079924   | 1.37E-28   |
| -0.157010839 | 0.01388136  | -0.527970276 | 5.48E-19    | 0.4911088    | 2.81E-16   |
| -0.213501403 | 0.000769325 | -0.634367816 | 5.44E-29    | 0.401561032  | 6.57E-11   |
| -0.024028043 | 0.708233934 | -0.365065825 | 3.87E-09    | 0.55984313   | 1.30E-21   |
| -0.000370095 | 0.995401598 | -0.35980646  | 6.69E-09    | 0.545445029  | 2.16E-20   |
| -0.18158795  | 0.00435121  | -0.528443766 | 5.03E-19    | 0.42361466   | 4.34E-12   |
| 0.05537998   | 0.388102657 | -0.236721608 | 0.000184298 | 0.512114464  | 8.80E-18   |
| 0.062758692  | 0.327940843 | -0.393956028 | 1.60E-10    | 0.337229121  | 6.27E-08   |
| -0.011194085 | 0.861610408 | -0.34521431  | 2.90E-08    | 0.51944798   | 2.48E-18   |
| -0.340914733 | 4.41E-08    | -0.547886351 | 1.35E-20    | 0.587224223  | 4.20E-24   |
| -0.157717627 | 0.013453457 | -0.388126615 | 3.12E-10    | 0.626346935  | 4.23E-28   |
| -0.216399922 | 0.000648744 | -0.535424305 | 1.41E-19    | 0.504265126  | 3.30E-17   |
| 0.114330165  | 0.074057183 | -0.325703225 | 1.84E-07    | 0.646591535  | 2.12E-30   |
| -0.319431537 | 3.24E-07    | -0.728605714 | 8.08E-42    | 0.546208554  | 1.87E-20   |
| 0.152648655  | 0.016796136 | -0.129826363 | 0.042324808 | 0.41025342   | 2.31E-11   |
| 0.378597309  | 9.06E-10    | -0.069643087 | 0.277553816 | 0.283706     | 6.45E-06   |
| -0.157851108 | 0.013373959 | -0.373016513 | 1.66E-09    | 0.715616882  | 9.63E-40   |
| -0.073903916 | 0.249140284 | -0.33491788  | 7.81E-08    | 0.492736916  | 2.17E-16   |
| -0.245999912 | 9.99E-05    | -0.581134046 | 1.58E-23    | 0.53525763   | 1.46E-19   |
| -0.218415831 | 0.000575454 | -0.556915401 | 2.33E-21    | 0.443450693  | 3.17E-13   |
| -0.081411011 | 0.204128797 | -0.522685301 | 1.41E-18    | 0.563040945  | 6.84E-22   |
| 0.191922428  | 0.002554645 | -0.109452918 | 0.08734215  | 0.529553763  | 4.12E-19   |
| -0.365332965 | 3.77E-09    | -0.72737052  | 1.29E-41    | 0.47003483   | 7.19E-15   |

|              |             |              |             |             |             |
|--------------|-------------|--------------|-------------|-------------|-------------|
| 0.169683768  | 0.007774304 | -0.076300317 | 0.234079176 | 0.301061705 | 1.59E-06    |
| -0.369318885 | 2.47E-09    | -0.581450689 | 1.47E-23    | 0.603076293 | 1.18E-25    |
| -0.187125253 | 0.003282037 | -0.580035638 | 2.00E-23    | 0.493345688 | 1.96E-16    |
| -0.27220218  | 1.56E-05    | -0.4136645   | 1.52E-11    | 0.605290403 | 7.02E-26    |
| 0.079957627  | 0.212349063 | -0.190703464 | 0.002724082 | 0.420273581 | 6.64E-12    |
| -0.136040246 | 0.033305466 | -0.534090822 | 1.80E-19    | 0.450453083 | 1.21E-13    |
| -0.048551265 | 0.449345068 | -0.570091978 | 1.62E-22    | 0.525984139 | 7.82E-19    |
| -0.357945026 | 8.11E-09    | -0.708370588 | 1.24E-38    | 0.488340254 | 4.36E-16    |
| -0.234506128 | 0.000212555 | -0.55847747  | 1.71E-21    | 0.376166149 | 1.18E-09    |
| 0.071747343  | 0.263258455 | -0.477890235 | 2.20E-15    | 0.414855906 | 1.31E-11    |
| -0.234140825 | 0.000217586 | -0.546978026 | 1.61E-20    | 0.402269142 | 6.04E-11    |
| -0.111831838 | 0.080641279 | -0.405783014 | 3.96E-11    | 0.479996239 | 1.60E-15    |
| -0.172869854 | 0.006678692 | -0.477732454 | 2.26E-15    | 0.580859323 | 1.67E-23    |
| -0.072361414 | 0.25918366  | -0.432232513 | 1.42E-12    | 0.173465867 | 0.006489783 |
| -0.096289485 | 0.132850526 | -0.532173389 | 2.56E-19    | 0.579143378 | 2.42E-23    |
| -0.222411986 | 0.000452288 | -0.348355445 | 2.13E-08    | 0.466726932 | 1.17E-14    |
| -0.07736045  | 0.227625168 | -0.308872027 | 8.18E-07    | 0.408938514 | 2.71E-11    |
| -0.150767655 | 0.018209423 | -0.561421009 | 9.49E-22    | 0.556738625 | 2.41E-21    |
| -0.325069471 | 1.95E-07    | -0.760193116 | 2.07E-47    | 0.566147484 | 3.64E-22    |
| -0.03149839  | 0.623689453 | -0.375936592 | 1.21E-09    | 0.322119915 | 2.55E-07    |
| 0.019697927  | 0.759015157 | -0.242113554 | 0.000129506 | 0.481716845 | 1.22E-15    |
| -0.230828094 | 0.000268553 | -0.661234015 | 3.56E-32    | 0.279441382 | 8.98E-06    |
| -0.144917745 | 0.02328594  | -0.6218647   | 1.30E-27    | 0.414087699 | 1.44E-11    |
| 0.100049495  | 0.11830328  | -0.239178951 | 0.00015708  | 0.454552625 | 6.79E-14    |
| 0.061914965  | 0.33449843  | -0.288671424 | 4.36E-06    | 0.370622564 | 2.15E-09    |
| -0.168203801 | 0.008335614 | -0.701474256 | 1.31E-37    | 0.542693471 | 3.64E-20    |
| -0.274277849 | 1.33E-05    | -0.630239129 | 1.58E-28    | 0.367194856 | 3.10E-09    |
| 0.041453111  | 0.518406785 | -0.391904575 | 2.03E-10    | 0.529872699 | 3.89E-19    |
| 0.057698933  | 0.36851317  | -0.338145088 | 5.75E-08    | 0.508293958 | 1.68E-17    |
| -0.117777663 | 0.065695592 | -0.316437332 | 4.23E-07    | 0.446828078 | 1.99E-13    |
| -0.264838926 | 2.68E-05    | -0.526173111 | 7.56E-19    | 0.424975657 | 3.65E-12    |
| -0.267419878 | 2.22E-05    | -0.769469206 | 3.20E-49    | 0.424382067 | 3.94E-12    |
| -0.084508853 | 0.187380613 | -0.365197993 | 3.82E-09    | 0.591036166 | 1.81E-24    |
| -0.396526305 | 1.19E-10    | -0.774644325 | 2.88E-50    | 0.515437594 | 4.98E-18    |
| 0.22183861   | 0.000468314 | -0.165490899 | 0.009458738 | 0.574807747 | 6.05E-23    |
| -0.29979186  | 1.76E-06    | -0.568299286 | 2.34E-22    | 0.459737668 | 3.24E-14    |
| -0.022497583 | 0.726048766 | -0.447258029 | 1.88E-13    | 0.349125671 | 1.97E-08    |
| -0.241503684 | 0.000134834 | -0.42220645  | 5.20E-12    | 0.196456318 | 0.002005177 |
| -0.346007767 | 2.68E-08    | -0.736120047 | 4.47E-43    | 0.503238317 | 3.91E-17    |
| -0.161624236 | 0.011291007 | -0.369574233 | 2.40E-09    | 0.433519616 | 1.20E-12    |

|              |             |              |             |             |          |
|--------------|-------------|--------------|-------------|-------------|----------|
| -0.217050078 | 0.000624215 | -0.416993547 | 1.00E-11    | 0.439874496 | 5.14E-13 |
| -0.108830678 | 0.089166609 | -0.384769257 | 4.56E-10    | 0.57778323  | 3.23E-23 |
| -0.069295106 | 0.279967533 | -0.573528127 | 7.92E-23    | 0.428134219 | 2.43E-12 |
| -0.113123954 | 0.077179363 | -0.504915907 | 2.96E-17    | 0.580549458 | 1.79E-23 |
| 0.023468068  | 0.714734358 | -0.392701062 | 1.85E-10    | 0.464499931 | 1.63E-14 |
| -0.254462841 | 5.60E-05    | -0.519185582 | 2.60E-18    | 0.477301284 | 2.41E-15 |
| -0.083486291 | 0.192793685 | -0.558257852 | 1.79E-21    | 0.256115578 | 4.99E-05 |
| -0.263263913 | 3.00E-05    | -0.519247203 | 2.57E-18    | 0.536163159 | 1.23E-19 |
| -0.245401429 | 0.000104025 | -0.613809246 | 9.29E-27    | 0.380848456 | 7.07E-10 |
| -0.119416896 | 0.062000142 | -0.577058866 | 3.76E-23    | 0.398722918 | 9.18E-11 |
| 0.007975289  | 0.901159625 | -0.325831563 | 1.82E-07    | 0.469938277 | 7.30E-15 |
| -0.269343049 | 1.92E-05    | -0.422204248 | 5.20E-12    | 0.439416851 | 5.47E-13 |
| -0.219448295 | 0.000540959 | -0.294904277 | 2.64E-06    | 0.49939098  | 7.38E-17 |
| 0.057765229  | 0.36796227  | -0.211673176 | 0.000855681 | 0.428912458 | 2.19E-12 |
| -0.333616211 | 8.83E-08    | -0.657392253 | 1.06E-31    | 0.608269748 | 3.48E-26 |
| -0.116851992 | 0.0678609   | -0.46778558  | 1.00E-14    | 0.354858573 | 1.11E-08 |
| -0.265154795 | 2.62E-05    | -0.670634577 | 2.28E-33    | 0.344857272 | 3.00E-08 |
| -0.221364271 | 0.000481967 | -0.49835659  | 8.73E-17    | 0.454835209 | 6.52E-14 |
| -0.250877627 | 7.17E-05    | -0.631151271 | 1.25E-28    | 0.452163186 | 9.50E-14 |
| -0.061166488 | 0.340385534 | -0.445198621 | 2.50E-13    | 0.611210519 | 1.73E-26 |
| -0.337862172 | 5.91E-08    | -0.510095694 | 1.24E-17    | 0.517760679 | 3.33E-18 |
| -0.0506423   | 0.430035982 | -0.327918334 | 1.50E-07    | 0.3947488   | 1.46E-10 |
| 0.068098934  | 0.28837247  | -0.356298029 | 9.59E-09    | 0.378382648 | 9.27E-10 |
| -0.026446986 | 0.680401104 | -0.298813347 | 1.91E-06    | 0.601508885 | 1.69E-25 |
| -0.183793755 | 0.003892473 | -0.533433274 | 2.04E-19    | 0.361317007 | 5.73E-09 |
| -0.16194415  | 0.011128329 | -0.485384045 | 6.93E-16    | 0.394138982 | 1.57E-10 |
| 0.165778454  | 0.009333648 | -0.174774911 | 0.006091548 | 0.389759691 | 2.59E-10 |
| 0.106708162  | 0.095620532 | -0.330238634 | 1.21E-07    | 0.439116341 | 5.70E-13 |
| -0.174463261 | 0.00618432  | -0.527361873 | 6.11E-19    | 0.430732454 | 1.73E-12 |
| 0.006985172  | 0.91337904  | -0.314537244 | 5.00E-07    | 0.674833535 | 6.47E-34 |
| -0.389620452 | 2.64E-10    | -0.742516484 | 3.51E-44    | 0.630210716 | 1.59E-28 |
| 0.092643356  | 0.148235241 | -0.293855449 | 2.87E-06    | 0.442260508 | 3.73E-13 |
| -0.083713493 | 0.191581199 | -0.324815118 | 1.99E-07    | 0.408886828 | 2.72E-11 |
| -0.258950736 | 4.08E-05    | -0.689710802 | 6.27E-36    | 0.483523654 | 9.26E-16 |
| -0.088123601 | 0.16913924  | -0.489204956 | 3.80E-16    | 0.469506547 | 7.78E-15 |
| -0.018957948 | 0.767804575 | -0.358536423 | 7.63E-09    | 0.47376943  | 4.11E-15 |
| -0.349616823 | 1.88E-08    | -0.649260434 | 1.02E-30    | 0.521170923 | 1.84E-18 |
| -0.28469089  | 5.97E-06    | -0.551420341 | 6.85E-21    | 0.490958983 | 2.88E-16 |
| -0.305179086 | 1.12E-06    | -0.717220726 | 5.42E-40    | 0.614119785 | 8.62E-27 |
| -0.121446265 | 0.057663765 | -0.407380035 | 3.27E-11    | 0.451674602 | 1.02E-13 |

|              |             |              |             |             |             |
|--------------|-------------|--------------|-------------|-------------|-------------|
| -0.19183147  | 0.00256695  | -0.574048913 | 7.10E-23    | 0.605747847 | 6.31E-26    |
| -0.203648986 | 0.001350805 | -0.718813401 | 3.04E-40    | 0.426765527 | 2.90E-12    |
| -0.082527908 | 0.19796987  | -0.396375745 | 1.21E-10    | 0.369857683 | 2.33E-09    |
| -0.178611152 | 0.005047416 | -0.472686168 | 4.84E-15    | 0.505061683 | 2.89E-17    |
| -0.135195638 | 0.034426169 | -0.413987056 | 1.46E-11    | 0.611864554 | 1.48E-26    |
| -0.159201187 | 0.012592786 | -0.599054784 | 2.97E-25    | 0.204176965 | 0.001311506 |
| -0.084426461 | 0.187812589 | -0.330585505 | 1.17E-07    | 0.402644849 | 5.77E-11    |
| -0.287191738 | 4.90E-06    | -0.726130498 | 2.05E-41    | 0.400042816 | 7.86E-11    |
| -0.056615394 | 0.377589132 | -0.293981895 | 2.84E-06    | 0.502435881 | 4.47E-17    |
| -0.150896621 | 0.018109322 | -0.353193173 | 1.31E-08    | 0.445580114 | 2.37E-13    |
| -0.306752168 | 9.81E-07    | -0.696045639 | 7.98E-37    | 0.381559294 | 6.53E-10    |
| -0.071192288 | 0.266979257 | -0.428822787 | 2.22E-12    | 0.518440743 | 2.96E-18    |
| -0.170397682 | 0.00751577  | -0.368617306 | 2.66E-09    | 0.52189918  | 1.61E-18    |
| -0.066662421 | 0.298687447 | -0.332637962 | 9.68E-08    | 0.494700567 | 1.58E-16    |
| -0.239789181 | 0.00015093  | -0.43965587  | 5.30E-13    | 0.266611577 | 2.35E-05    |
| -0.194632094 | 0.002211799 | -0.570236493 | 1.57E-22    | 0.474876537 | 3.48E-15    |
| 0.144116317  | 0.024068693 | -0.147391437 | 0.021006848 | 0.619694661 | 2.22E-27    |
| 0.04717565   | 0.462309782 | -0.301839223 | 1.49E-06    | 0.458325255 | 3.97E-14    |
| -0.132787436 | 0.037798856 | -0.338601149 | 5.50E-08    | 0.44207815  | 3.82E-13    |
| 0.023920951  | 0.709475494 | -0.390955274 | 2.26E-10    | 0.574264398 | 6.78E-23    |
| 0.392661631  | 1.86E-10    | -0.103493217 | 0.106098011 | 0.363278434 | 4.67E-09    |
| -0.292286002 | 3.26E-06    | -0.773221628 | 5.62E-50    | 0.515801964 | 4.68E-18    |
| -0.325555415 | 1.86E-07    | -0.544119707 | 2.78E-20    | 0.582126976 | 1.27E-23    |
| -0.139990346 | 0.028467087 | -0.34977383  | 1.85E-08    | 0.27927457  | 9.10E-06    |
| -0.069910366 | 0.275709467 | -0.350429568 | 1.73E-08    | 0.484857391 | 7.52E-16    |
| 0.191478581  | 0.002615198 | -0.277848741 | 1.01E-05    | 0.394501658 | 1.50E-10    |
| -0.259974632 | 3.80E-05    | -0.436865105 | 7.70E-13    | 0.530394444 | 3.54E-19    |
| 0.160630327  | 0.011809883 | -0.258751775 | 4.14E-05    | 0.436284967 | 8.32E-13    |
| -0.440798854 | 4.54E-13    | -0.7144751   | 1.45E-39    | 0.405072469 | 4.32E-11    |
| -0.120220042 | 0.06025294  | -0.470376055 | 6.84E-15    | 0.511082986 | 1.05E-17    |
| -0.101520188 | 0.112963268 | -0.436119885 | 8.51E-13    | 0.350019702 | 1.80E-08    |
| 0.008550181  | 0.894075136 | -0.383862039 | 5.05E-10    | 0.242160871 | 0.000129102 |
| -0.397311027 | 1.08E-10    | -0.632790893 | 8.18E-29    | 0.421824374 | 5.45E-12    |
| -0.210598955 | 0.000910502 | -0.552755843 | 5.28E-21    | 0.407720289 | 3.14E-11    |
| -0.221674751 | 0.000472989 | -0.610119599 | 2.25E-26    | 0.497211364 | 1.05E-16    |
| -0.051143146 | 0.425483167 | -0.489040867 | 3.90E-16    | 0.276737503 | 1.10E-05    |
| 0.030527317  | 0.634433984 | -0.424841162 | 3.71E-12    | 0.31246586  | 5.99E-07    |
| -0.209155838 | 0.000989245 | -0.503354286 | 3.84E-17    | 0.620763656 | 1.70E-27    |
| -0.235309513 | 0.000201871 | -0.549727667 | 9.50E-21    | 0.528852921 | 4.68E-19    |
| -0.272853584 | 1.48E-05    | -0.495787156 | 1.33E-16    | 0.581913263 | 1.33E-23    |

|              |             |              |             |              |             |
|--------------|-------------|--------------|-------------|--------------|-------------|
| -0.1194973   | 0.061823372 | -0.397330148 | 1.08E-10    | 0.67814216   | 2.36E-34    |
| 0.082263115  | 0.199417661 | -0.231478662 | 0.000257741 | 0.466143295  | 1.28E-14    |
| -0.135485253 | 0.034038327 | -0.333713873 | 8.75E-08    | 0.365522321  | 3.69E-09    |
| -0.030075502 | 0.639459534 | -0.203199763 | 0.001385089 | 0.539096526  | 7.15E-20    |
| -0.100792368 | 0.115581862 | -0.450241286 | 1.24E-13    | 0.471959476  | 5.40E-15    |
| -0.182637426 | 0.004127202 | -0.450162213 | 1.26E-13    | 0.302987939  | 1.35E-06    |
| -0.308862384 | 8.19E-07    | -0.650306682 | 7.68E-31    | 0.506589652  | 2.24E-17    |
| -0.294580906 | 2.71E-06    | -0.611899645 | 1.47E-26    | 0.173595944  | 0.006449196 |
| -0.158141377 | 0.013202503 | -0.451036742 | 1.11E-13    | 0.415560752  | 1.20E-11    |
| -0.424230155 | 4.01E-12    | -0.707426915 | 1.72E-38    | 0.38367905   | 5.16E-10    |
| -0.208382938 | 0.00103395  | -0.651514829 | 5.50E-31    | 0.528889993  | 4.64E-19    |
| 0.128948167  | 0.043751666 | -0.319869967 | 3.12E-07    | 0.355220085  | 1.07E-08    |
| -0.278316616 | 9.79E-06    | -0.717175487 | 5.50E-40    | 0.594220879  | 8.88E-25    |
| -0.091242407 | 0.154493521 | -0.331466313 | 1.08E-07    | 0.364583213  | 4.08E-09    |
| -0.227345163 | 0.000333985 | -0.562042034 | 8.37E-22    | 0.23870498   | 0.000162018 |
| -0.272163175 | 1.56E-05    | 0.221483074  | 0.000478513 | -0.324038449 | 2.14E-07    |
| -0.247867276 | 8.81E-05    | -0.668813623 | 3.91E-33    | 0.457105407  | 4.72E-14    |
| 0.128459165  | 0.044563527 | -0.040098185 | 0.532182811 | 0.253134355  | 6.14E-05    |
| -0.027963242 | 0.663169959 | -0.29137257  | 3.51E-06    | 0.231609317  | 0.000255619 |
| 0.295862101  | 2.44E-06    | -0.017301742 | 0.787583173 | 0.248324264  | 8.54E-05    |
| -0.118430826 | 0.064202047 | -0.298578031 | 1.95E-06    | 0.327539756  | 1.55E-07    |
| 0.048766788  | 0.447332568 | -0.178558742 | 0.005060523 | 0.319029658  | 3.36E-07    |
| -0.227205899 | 0.000336886 | -0.573795158 | 7.49E-23    | 0.516771902  | 3.95E-18    |
| 0.01181415   | 0.85402803  | -0.308819995 | 8.22E-07    | 0.417833944  | 9.02E-12    |
| -0.23722519  | 0.000178385 | -0.65214316  | 4.62E-31    | 0.378355404  | 9.30E-10    |
| -0.298114185 | 2.03E-06    | -0.308351622 | 8.56E-07    | 0.184464889  | 0.00376183  |
| -0.167132528 | 0.008764112 | -0.56552805  | 4.13E-22    | 0.450342041  | 1.23E-13    |
| -0.31007949  | 7.37E-07    | -0.620230741 | 1.94E-27    | 0.281940366  | 7.40E-06    |
| -0.089698691 | 0.161618344 | -0.495947948 | 1.29E-16    | 0.480595399  | 1.46E-15    |
| -0.17819091  | 0.005153375 | -0.613253794 | 1.06E-26    | 0.253584614  | 5.95E-05    |
| -0.275785335 | 1.19E-05    | -0.392335249 | 1.93E-10    | 0.201750317  | 0.001501217 |
| -0.354905799 | 1.10E-08    | -0.613010118 | 1.13E-26    | 0.3277793    | 1.52E-07    |
| -0.346510265 | 2.55E-08    | -0.50267929  | 4.29E-17    | 0.316334597  | 4.27E-07    |
| -0.115714718 | 0.070600684 | -0.357034768 | 8.90E-09    | 0.404077824  | 4.87E-11    |
| -0.143948546 | 0.024235394 | -0.413353786 | 1.58E-11    | 0.495081379  | 1.49E-16    |
| 0.205491356  | 0.001218184 | -0.122291496 | 0.055933123 | 0.433550019  | 1.20E-12    |
| -0.254488843 | 5.59E-05    | -0.571981703 | 1.09E-22    | 0.308627582  | 8.36E-07    |
| -0.11090268  | 0.083207373 | -0.510200261 | 1.22E-17    | 0.441005226  | 4.42E-13    |
| -0.036589474 | 0.56869271  | -0.346878413 | 2.46E-08    | 0.149547168  | 0.019180827 |
| -0.282184668 | 7.26E-06    | -0.616692059 | 4.62E-27    | 0.343650187  | 3.38E-08    |

|              |             |              |             |             |             |
|--------------|-------------|--------------|-------------|-------------|-------------|
| 0.085494702  | 0.182268276 | -0.327438999 | 1.57E-07    | 0.184547576 | 0.003746012 |
| -0.292668515 | 3.16E-06    | -0.486372277 | 5.94E-16    | 0.491191949 | 2.77E-16    |
| -0.166437443 | 0.009052496 | -0.499547827 | 7.19E-17    | 0.307657454 | 9.08E-07    |
| -0.11994342  | 0.06085008  | -0.398631022 | 9.28E-11    | 0.360995507 | 5.92E-09    |
| -0.238324425 | 0.000166087 | -0.599121185 | 2.92E-25    | 0.437760673 | 6.83E-13    |
| -0.032696483 | 0.610542073 | -0.343848214 | 3.32E-08    | 0.385407182 | 4.25E-10    |
| -0.112187583 | 0.079675873 | -0.537902072 | 8.93E-20    | 0.297562691 | 2.12E-06    |
| -0.172416338 | 0.006825711 | -0.555039008 | 3.37E-21    | 0.197463711 | 0.001898772 |
| -0.134138159 | 0.035874325 | -0.490738246 | 2.98E-16    | 0.329122163 | 1.34E-07    |
| -0.182710291 | 0.004112042 | -0.555582719 | 3.03E-21    | 0.590120233 | 2.22E-24    |
| -0.457053663 | 4.76E-14    | -0.712956712 | 2.48E-39    | 0.373681605 | 1.55E-09    |
| -0.086361224 | 0.177860271 | -0.384914895 | 4.49E-10    | 0.320366433 | 2.98E-07    |
| 0.076759331  | 0.231269091 | -0.096975766 | 0.130097367 | 0.259853982 | 3.83E-05    |
| -0.304460203 | 1.19E-06    | -0.698599738 | 3.42E-37    | 0.412597065 | 1.73E-11    |
| -0.236273843 | 0.000189709 | -0.419258259 | 7.55E-12    | 0.206572201 | 0.001146053 |
| -0.238571047 | 0.000163439 | -0.650988026 | 6.36E-31    | 0.437276657 | 7.29E-13    |
| -0.18019647  | 0.004665093 | -0.341284735 | 4.25E-08    | 0.5533128   | 4.73E-21    |
| -0.241901879 | 0.000131333 | -0.640101998 | 1.21E-29    | 0.307594324 | 9.13E-07    |
| -0.05705611  | 0.373881198 | -0.363517016 | 4.56E-09    | 0.193095622 | 0.002400674 |
| -0.157479861 | 0.013596094 | -0.425263391 | 3.52E-12    | 0.370427139 | 2.20E-09    |
| -0.263473617 | 2.95E-05    | -0.579548525 | 2.22E-23    | 0.115106681 | 0.072102084 |
| -0.243407237 | 0.000118852 | -0.574727745 | 6.15E-23    | 0.297611775 | 2.11E-06    |
| -0.239283608 | 0.000156009 | -0.4732539   | 4.45E-15    | 0.124980304 | 0.050711324 |
| -0.064853793 | 0.312018454 | -0.240756616 | 0.000141639 | 0.207426035 | 0.00109187  |
| 0.200193558  | 0.001635819 | -0.316192618 | 4.32E-07    | 0.578342553 | 2.86E-23    |
| -0.299182241 | 1.85E-06    | -0.77365853  | 4.58E-50    | 0.54662065  | 1.73E-20    |
| -0.210621189 | 0.000909335 | -0.627999037 | 2.79E-28    | 0.40821924  | 2.95E-11    |
| -0.188903101 | 0.002993039 | -0.626875549 | 3.70E-28    | 0.283813863 | 6.40E-06    |
| -0.130994356 | 0.040487893 | -0.686800158 | 1.59E-35    | 0.465551804 | 1.39E-14    |
| -0.011955818 | 0.852297508 | -0.321774213 | 2.63E-07    | 0.338207334 | 5.72E-08    |
| -0.338767475 | 5.42E-08    | -0.637285068 | 2.54E-29    | 0.241740417 | 0.000132742 |
| 0.036568696  | 0.568912414 | -0.381983306 | 6.23E-10    | 0.434512537 | 1.05E-12    |
| -0.351405763 | 1.57E-08    | -0.804039643 | 8.61E-57    | 0.472829989 | 4.74E-15    |
| -0.112139352 | 0.079806212 | -0.52086678  | 1.94E-18    | 0.29819678  | 2.01E-06    |
| 0.071529979  | 0.264711295 | -0.255259317 | 5.30E-05    | 0.301702111 | 1.50E-06    |
| -0.207199636 | 0.001106003 | -0.59789939  | 3.86E-25    | 0.553498939 | 4.56E-21    |
| -0.067587963 | 0.292013838 | -0.312075963 | 6.20E-07    | 0.294660594 | 2.69E-06    |
| -0.198865704 | 0.001759256 | -0.424528553 | 3.86E-12    | 0.323475928 | 2.25E-07    |
| 0.011647032  | 0.856070325 | -0.294515184 | 2.72E-06    | 0.229647136 | 0.000289267 |
| -0.184269649 | 0.003799421 | -0.526283277 | 7.42E-19    | 0.442094357 | 3.81E-13    |



|              |             |              |             |              |             |
|--------------|-------------|--------------|-------------|--------------|-------------|
| -0.029971313 | 0.64062078  | -0.165756751 | 0.009343037 | 0.323869519  | 2.17E-07    |
| -0.400720708 | 7.26E-11    | -0.693326666 | 1.95E-36    | 0.272481219  | 1.52E-05    |
| -0.143629601 | 0.02455505  | -0.574817897 | 6.04E-23    | 0.23859391   | 0.000163196 |
| 0.079891471  | 0.212728813 | -0.335315283 | 7.52E-08    | 0.424520778  | 3.87E-12    |
| -0.418887277 | 7.91E-12    | -0.344203201 | 3.20E-08    | 0.142337417  | 0.025887534 |
| 0.048071093  | 0.453847088 | -0.136190123 | 0.033109872 | 0.188777036  | 0.003012745 |
| -0.358341367 | 7.78E-09    | -0.664251621 | 1.49E-32    | 0.308650053  | 8.34E-07    |
| 0.111050027  | 0.08279611  | -0.18734412  | 0.003245144 | 0.418752879  | 8.04E-12    |
| -0.099371995 | 0.120828525 | -0.540960031 | 5.04E-20    | 0.312469371  | 5.99E-07    |
| -0.109946596 | 0.085916045 | -0.553220316 | 4.82E-21    | 0.498179162  | 8.99E-17    |
| -0.14881663  | 0.019783557 | -0.406360757 | 3.70E-11    | 0.392377484  | 1.92E-10    |
| -0.005071084 | 0.937056799 | -0.293720794 | 2.90E-06    | 0.314323146  | 5.10E-07    |
| 0.004069041  | 0.949475765 | -0.163654761 | 0.0102931   | 0.287999929  | 4.60E-06    |
| -0.425014473 | 3.63E-12    | -0.724975386 | 3.16E-41    | 0.458492584  | 3.87E-14    |
| -0.476358259 | 2.78E-15    | -0.745562574 | 1.02E-44    | 0.456316449  | 5.29E-14    |
| -0.057391784 | 0.371072105 | -0.36293345  | 4.84E-09    | 0.479011723  | 1.86E-15    |
| -0.006464478 | 0.919813479 | -0.344873007 | 3.00E-08    | 0.284345286  | 6.14E-06    |
| -0.436332013 | 8.27E-13    | -0.850727423 | 7.92E-70    | 0.442408193  | 3.65E-13    |
| -0.110617555 | 0.084007867 | -0.415158241 | 1.26E-11    | 0.231187398  | 0.00026253  |
| -0.17846791  | 0.005083311 | -0.504864406 | 2.99E-17    | 0.3632438    | 4.69E-09    |
| -0.141929663 | 0.0263207   | -0.139097652 | 0.029504411 | 0.283071314  | 6.78E-06    |
| -0.169953019 | 0.007675883 | -0.331843881 | 1.04E-07    | 0.60364957   | 1.03E-25    |
| -0.229798606 | 0.00028653  | -0.292254705 | 3.27E-06    | 0.435309375  | 9.47E-13    |
| -0.225742807 | 0.000368819 | -0.180626875 | 0.004565895 | -0.062554878 | 0.329517277 |
| 0.061274859  | 0.339529083 | -0.20928686  | 0.000981846 | 0.387288533  | 3.44E-10    |
| 0.128023415  | 0.045297584 | -0.181864591 | 0.004291122 | 0.1101008    | 0.085474446 |
| -0.100432598 | 0.11689366  | -0.259713649 | 3.87E-05    | 0.17187273   | 0.00700574  |
| -0.218069706 | 0.000587467 | -0.272786671 | 1.49E-05    | 0.370210835  | 2.25E-09    |
| 0.244243929  | 0.000112405 | 0.257055835  | 4.67E-05    | -0.097353019 | 0.128602796 |
| -0.048309057 | 0.451612818 | -0.177786336 | 0.005257267 | 0.127835418  | 0.045617393 |
| -0.039031204 | 0.543159371 | -0.238544613 | 0.000163721 | 0.300460058  | 1.67E-06    |
| -0.129023335 | 0.043627976 | -0.206906106 | 0.001124577 | 0.34915426   | 1.97E-08    |
| -0.064293124 | 0.316228967 | -0.188575868 | 0.003044434 | 0.588538686  | 3.15E-24    |
| -0.066693366 | 0.298462698 | -0.178212661 | 0.005147842 | 0.504809917  | 3.02E-17    |
| 0.106984515  | 0.094759755 | -0.079324574 | 0.21600291  | 0.337965734  | 5.85E-08    |
| 0.359561035  | 6.87E-09    | -0.156778156 | 0.01402482  | 0.445441359  | 2.41E-13    |
| -0.048584732 | 0.449032225 | -0.232370367 | 0.000243579 | 0.411300466  | 2.03E-11    |
| -0.139345106 | 0.029213679 | -0.281397487 | 7.72E-06    | 0.45779821   | 4.28E-14    |
| -0.057486489 | 0.370281934 | 0.07403443   | 0.248303078 | 0.047058549  | 0.463422913 |
| -0.220015363 | 0.000522838 | -0.265429191 | 2.56E-05    | 0.453854548  | 7.49E-14    |

|              |             |              |             |              |             |
|--------------|-------------|--------------|-------------|--------------|-------------|
| -0.28873981  | 4.34E-06    | -0.150773951 | 0.018204525 | 0.036068544  | 0.574212996 |
| -0.182758799 | 0.004101978 | -0.193604386 | 0.002336567 | 0.420471309  | 6.47E-12    |
| 0.004569004  | 0.943277695 | -0.277590706 | 1.03E-05    | 0.663878317  | 1.66E-32    |
| -0.233845582 | 0.000221732 | -0.218257141 | 0.000580933 | 0.545025718  | 2.34E-20    |
| -0.212904053 | 0.000796614 | -0.289633375 | 4.04E-06    | 0.585688955  | 5.88E-24    |
| -0.055720941 | 0.385183477 | -0.211177698 | 0.000880578 | 0.584248612  | 8.05E-24    |
| 0.372090017  | 1.84E-09    | 0.111000283  | 0.082934768 | 0.114612245  | 0.073342045 |
| -0.096600609 | 0.131596883 | -0.084955193 | 0.185053136 | 0.207384341  | 0.00109446  |
| -0.169593975 | 0.007807375 | -0.29763013  | 2.11E-06    | 0.492969751  | 2.09E-16    |
| -0.090518121 | 0.157806266 | -0.284570138 | 6.03E-06    | 0.251882814  | 6.69E-05    |
| -0.072132063 | 0.260700458 | -0.230241812 | 0.000278657 | 0.488578267  | 4.19E-16    |
| -0.055805871 | 0.384458419 | -0.315225068 | 4.71E-07    | 0.564009492  | 5.63E-22    |
| 0.015597753  | 0.808075376 | -0.044129716 | 0.49174133  | 0.327330163  | 1.58E-07    |
| -0.299961981 | 1.74E-06    | -0.164347635 | 0.009970895 | -0.247727646 | 8.89E-05    |
| -0.088685279 | 0.166427911 | -0.059520215 | 0.353564751 | 0.024997472  | 0.697030431 |
| 0.064688813  | 0.313253595 | -0.063681687 | 0.320862779 | 0.474196226  | 3.86E-15    |
| -0.220496061 | 0.000507919 | -0.204800813 | 0.001266424 | 0.144177703  | 0.024007946 |
| -0.238655928 | 0.000162537 | -0.268997697 | 1.97E-05    | 0.582829715  | 1.09E-23    |
| -0.074340738 | 0.246345893 | 0.149388811  | 0.019310108 | -0.535572283 | 1.37E-19    |
| -0.165492591 | 0.009457997 | -0.268770179 | 2.01E-05    | 0.549675543  | 9.60E-21    |
| -1.28E-05    | 0.999840535 | -0.1985864   | 0.00178628  | 0.533157211  | 2.14E-19    |
| -0.157295929 | 0.013707345 | -0.302309205 | 1.43E-06    | 0.647414072  | 1.70E-30    |
| -0.123268599 | 0.053986275 | -0.312827739 | 5.81E-07    | 0.568635384  | 2.19E-22    |
| -0.154438913 | 0.015540889 | -0.243508104 | 0.000118057 | 0.37711338   | 1.07E-09    |
| -0.136426145 | 0.032803837 | -0.19989688  | 0.00166269  | 0.393978731  | 1.60E-10    |
| 0.195054281  | 0.002162325 | 0.289364387  | 4.12E-06    | -0.2765549   | 1.12E-05    |
| -0.191411616 | 0.002624447 | -0.246646269 | 9.57E-05    | 0.480408144  | 1.50E-15    |
| -0.299212572 | 1.85E-06    | -0.293679703 | 2.91E-06    | 0.41683322   | 1.02E-11    |
| -0.178498688 | 0.005075579 | -0.230564991 | 0.000273044 | 0.494056575  | 1.75E-16    |
| -0.185257742 | 0.003612605 | -0.238200406 | 0.000167434 | 0.149000767  | 0.019630106 |
| 0.262074448  | 3.27E-05    | 0.082605193  | 0.197548749 | -0.451512445 | 1.04E-13    |
| -0.198781506 | 0.001767363 | -0.330142138 | 1.22E-07    | 0.570439284  | 1.51E-22    |
| -0.131347239 | 0.039946302 | 0.104658351  | 0.102200958 | -0.454637818 | 6.71E-14    |
| 0.249587685  | 7.84E-05    | 0.176809734  | 0.005515839 | -0.400310849 | 7.62E-11    |
| 0.109764193  | 0.086440768 | 0.201791097  | 0.001497832 | -0.022230307 | 0.729175389 |
| -0.279190984 | 9.16E-06    | -0.207824903 | 0.001067374 | 0.173680836  | 0.006422829 |
| 0.069009928  | 0.281956167 | 0.252253565  | 6.53E-05    | -0.356424742 | 9.47E-09    |
| -0.040398005 | 0.529118628 | -0.268433998 | 2.06E-05    | 0.574789333  | 6.08E-23    |
| -0.082241534 | 0.199535998 | -0.269531823 | 1.90E-05    | 0.440047068  | 5.03E-13    |
| -0.054794861 | 0.393143337 | -0.245053877 | 0.000106477 | 0.343026315  | 3.59E-08    |

|              |             |              |             |              |             |
|--------------|-------------|--------------|-------------|--------------|-------------|
| 0.014006968  | 0.827325321 | -0.264547237 | 2.73E-05    | 0.37257563   | 1.74E-09    |
| -0.335798329 | 7.19E-08    | -0.285469537 | 5.62E-06    | 0.242470232  | 0.000126483 |
| 0.261040454  | 3.52E-05    | 0.297308411  | 2.17E-06    | 0.052393831  | 0.414237019 |
| -0.186698115 | 0.003355131 | -0.310289971 | 7.24E-07    | 0.521651374  | 1.69E-18    |
| -0.039322639 | 0.540150143 | -0.183086746 | 0.004034517 | 0.668901715  | 3.81E-33    |
| 0.020031416  | 0.755064013 | 0.15499833   | 0.015165852 | -0.054496687 | 0.395727143 |
| -0.197150095 | 0.001931332 | -0.175404527 | 0.005907915 | 0.242886458  | 0.000123038 |
| 0.223715182  | 0.000417738 | 0.293910854  | 2.86E-06    | -0.259363695 | 3.97E-05    |
| 0.252829616  | 6.27E-05    | -0.033396295 | 0.602919619 | 0.30717039   | 9.47E-07    |
| 0.359992085  | 6.57E-09    | 0.1673976    | 0.008656303 | -0.32905454  | 1.35E-07    |
| 0.903236415  | 2.98E-91    | 0.71994271   | 2.02E-40    | -0.115570757 | 0.070953837 |
| 0.899305663  | 2.94E-89    | 0.693049779  | 2.13E-36    | -0.251250032 | 6.99E-05    |
| 0.808678263  | 6.36E-58    | 0.490068415  | 3.31E-16    | -0.261670633 | 3.36E-05    |
| 0.855311899  | 2.41E-71    | 0.737350211  | 2.76E-43    | -0.239311052 | 0.000155729 |
| 0.889080953  | 1.96E-84    | 0.639500045  | 1.42E-29    | -0.211316862 | 0.000873518 |
| 0.861288618  | 2.10E-73    | 0.70649175   | 2.37E-38    | -0.133108439 | 0.037333751 |
| 0.877687233  | 1.37E-79    | 0.710524975  | 5.84E-39    | -0.157843074 | 0.013378732 |
| 0.428973765  | 2.18E-12    | 0.191973265  | 0.002547791 | -0.300496497 | 1.66E-06    |
| 0.711771517  | 3.77E-39    | 0.425197644  | 3.55E-12    | -0.040067014 | 0.532501887 |
| 0.905785231  | 1.37E-92    | 0.840192688  | 1.59E-66    | -0.30162152  | 1.51E-06    |
| 0.666475565  | 7.79E-33    | 0.437876327  | 6.73E-13    | -0.458821475 | 3.70E-14    |
| 0.835638869  | 3.59E-65    | 0.736664263  | 3.61E-43    | -0.223850076 | 0.000414305 |
| 0.941494566  | 9.07E-117   | 0.578498638  | 2.77E-23    | -0.157104889 | 0.01382374  |
| 0.441874503  | 3.93E-13    | 0.269513517  | 1.90E-05    | -0.182775585 | 0.004098501 |
| -0.466936582 | 1.14E-14    | -0.273955458 | 1.36E-05    | -0.16238055  | 0.010909754 |
| 0.863675171  | 2.97E-74    | 0.658038625  | 8.85E-32    | -0.123363912 | 0.053799413 |
| 0.925248996  | 2.83E-104   | 0.605442266  | 6.77E-26    | -0.148831216 | 0.019771363 |
| 0.586139728  | 5.33E-24    | 0.352390136  | 1.42E-08    | -0.342886582 | 3.64E-08    |
| 0.792420334  | 4.36E-54    | 0.619717853  | 2.21E-27    | -0.256149216 | 4.98E-05    |
| 0.777313535  | 8.09E-51    | 0.441289308  | 4.25E-13    | -0.256837911 | 4.74E-05    |
| 0.769026524  | 3.93E-49    | 0.612480276  | 1.28E-26    | -0.350259307 | 1.76E-08    |
| 0.832760559  | 2.46E-64    | 0.543804108  | 2.95E-20    | -0.164701369 | 0.009809868 |
| 0.385917115  | 4.01E-10    | -0.021170242 | 0.741619829 | 0.438353405  | 6.31E-13    |
| 0.907984015  | 8.90E-94    | 0.617174593  | 4.11E-27    | -0.088178985 | 0.168870434 |
| 0.889230214  | 1.68E-84    | 0.560263535  | 1.20E-21    | -0.042663253 | 0.506259567 |
| 0.74730426   | 4.98E-45    | 0.474107784  | 3.91E-15    | -0.326599803 | 1.69E-07    |
| 0.778782729  | 4.00E-51    | 0.279579784  | 8.89E-06    | -0.06296387  | 0.326358776 |
| 0.882505556  | 1.41E-81    | 0.570356988  | 1.53E-22    | -0.072407821 | 0.258877486 |
| 0.775071167  | 2.35E-50    | 0.492821766  | 2.14E-16    | -0.131713535 | 0.039390599 |
| 0.926892935  | 2.10E-105   | 0.822398381  | 1.86E-61    | -0.267874852 | 2.14E-05    |

|              |           |              |             |              |             |
|--------------|-----------|--------------|-------------|--------------|-------------|
| 0.872534363  | 1.49E-77  | 0.512217546  | 8.65E-18    | -0.151091901 | 0.017958661 |
| 0.827707418  | 6.58E-63  | 0.63999667   | 1.24E-29    | -0.215733365 | 0.000674815 |
| 0.832979737  | 2.13E-64  | 0.639505165  | 1.42E-29    | -0.027366261 | 0.669933721 |
| 0.850221347  | 1.16E-69  | 0.659392705  | 6.02E-32    | -0.072892306 | 0.255695977 |
| 0.593612379  | 1.02E-24  | 0.266719872  | 2.33E-05    | 0.096247729  | 0.133019475 |
| 0.870574964  | 8.39E-77  | 0.790182185  | 1.38E-53    | -0.227087557 | 0.00033937  |
| 0.943941044  | 5.87E-119 | 0.776981569  | 9.48E-51    | -0.306295428 | 1.02E-06    |
| 0.776696344  | 1.09E-50  | 0.368577808  | 2.67E-09    | -0.205669288 | 0.00120603  |
| 0.834631761  | 7.07E-65  | 0.72197502   | 9.59E-41    | -0.220095795 | 0.000520314 |
| 0.814793239  | 1.84E-59  | 0.545213647  | 2.26E-20    | -0.115484911 | 0.071165114 |
| 0.800468445  | 6.10E-56  | 0.680694925  | 1.08E-34    | -0.210528329 | 0.000914217 |
| 0.868491628  | 5.11E-76  | 0.662914096  | 2.19E-32    | -0.304871964 | 1.15E-06    |
| 0.801731706  | 3.06E-56  | 0.476451016  | 2.74E-15    | -0.274850188 | 1.27E-05    |
| 0.848803898  | 3.32E-69  | 0.568881722  | 2.08E-22    | -0.171741779 | 0.007049736 |
| 0.743444398  | 2.41E-44  | 0.588855718  | 2.93E-24    | -0.318557757 | 3.51E-07    |
| 0.737084117  | 3.06E-43  | 0.362501655  | 5.06E-09    | -0.04010098  | 0.5321542   |
| 0.827538274  | 7.33E-63  | 0.561204752  | 9.91E-22    | -0.220904366 | 0.000495557 |
| 0.810198391  | 2.67E-58  | 0.500067228  | 6.60E-17    | -0.066880706 | 0.297104457 |
| 0.860949223  | 2.76E-73  | 0.619849937  | 2.13E-27    | -0.189114875 | 0.002960198 |
| 0.763389748  | 5.02E-48  | 0.510783185  | 1.10E-17    | -0.200993179 | 0.001565361 |
| 0.838177325  | 6.40E-66  | 0.613004431  | 1.13E-26    | -0.069562397 | 0.278112254 |
| 0.789553385  | 1.91E-53  | 0.640382354  | 1.12E-29    | -0.227379899 | 0.000333264 |
| 0.745568382  | 1.02E-44  | 0.382149682  | 6.12E-10    | 0.085987103  | 0.179753657 |
| 0.838577084  | 4.86E-66  | 0.60802507   | 3.69E-26    | -0.167165813 | 0.008750509 |
| 0.883439966  | 5.68E-82  | 0.721605169  | 1.10E-40    | -0.204986213 | 0.001253303 |
| 0.860736446  | 3.28E-73  | 0.595177767  | 7.16E-25    | -0.268060061 | 2.11E-05    |
| 0.811154031  | 1.54E-58  | 0.476676468  | 2.65E-15    | 0.005658331  | 0.929785541 |
| -0.426753131 | 2.90E-12  | -0.237415171 | 0.0001762   | 0.226159854  | 0.000359441 |
| 0.79200274   | 5.41E-54  | 0.49816217   | 9.01E-17    | -0.106330109 | 0.096808142 |
| 0.852304823  | 2.41E-70  | 0.63539901   | 4.16E-29    | -0.044518663 | 0.487928287 |
| 0.829664303  | 1.87E-63  | 0.759116736  | 3.31E-47    | -0.341078423 | 4.34E-08    |
| 0.757888275  | 5.65E-47  | 0.452364692  | 9.24E-14    | -0.065433892 | 0.307700863 |
| 0.46038801   | 2.95E-14  | 0.177887903  | 0.00523101  | -0.219830727 | 0.000528676 |
| 0.778343743  | 4.94E-51  | 0.38305519   | 5.53E-10    | 0.102934591  | 0.108007534 |
| 0.74276945   | 3.17E-44  | 0.505567167  | 2.66E-17    | -0.170005003 | 0.007657009 |
| -0.48116268  | 1.33E-15  | -0.220946045 | 0.000494311 | 0.053915317  | 0.400794181 |
| 0.642225427  | 6.87E-30  | 0.862724845  | 6.50E-74    | -0.284665821 | 5.98E-06    |
| 0.491825433  | 2.50E-16  | 0.71128238   | 4.48E-39    | -0.407178193 | 3.35E-11    |
| 0.377487432  | 1.02E-09  | 0.527388648  | 6.08E-19    | -0.215707897 | 0.00067583  |
| 0.467911709  | 9.85E-15  | 0.664774247  | 1.28E-32    | -0.083063857 | 0.195062922 |

|              |             |              |          |              |             |
|--------------|-------------|--------------|----------|--------------|-------------|
| 0.693895501  | 1.62E-36    | 0.798893076  | 1.43E-55 | -0.435683995 | 9.01E-13    |
| 0.497253173  | 1.05E-16    | 0.832459463  | 3.00E-64 | -0.276634741 | 1.11E-05    |
| -0.538261027 | 8.35E-20    | -0.639420194 | 1.45E-29 | 0.404959983  | 4.38E-11    |
| 0.510901621  | 1.08E-17    | 0.719484178  | 2.39E-40 | -0.1944673   | 0.002231388 |
| 0.543633157  | 3.05E-20    | 0.826703649  | 1.25E-62 | -0.190509778 | 0.002751925 |
| -0.211384542 | 0.000870104 | -0.370646442 | 2.14E-09 | 0.416182638  | 1.11E-11    |
| 0.444449821  | 2.76E-13    | 0.424412099  | 3.92E-12 | -0.217608557 | 0.000603832 |
| 0.646293314  | 2.30E-30    | 0.751455152  | 8.83E-46 | -0.345962991 | 2.70E-08    |
| 0.290809501  | 3.67E-06    | 0.769615507  | 3.00E-49 | -0.430150404 | 1.87E-12    |
| 0.426881485  | 2.85E-12    | 0.676006746  | 4.53E-34 | -0.127619404 | 0.045987197 |
| 0.575746059  | 4.97E-23    | 0.707832553  | 1.49E-38 | -0.298475287 | 1.97E-06    |
| 0.413751521  | 1.50E-11    | 0.541051229  | 4.96E-20 | -0.176508067 | 0.005597985 |
| 0.725080222  | 3.04E-41    | 0.693960301  | 1.58E-36 | -0.213566153 | 0.000766419 |
| -0.313573959 | 5.44E-07    | -0.489443132 | 3.66E-16 | 0.692912729  | 2.23E-36    |
| 0.583888606  | 8.70E-24    | 0.667547928  | 5.68E-33 | -0.349496622 | 1.90E-08    |
| 0.570473671  | 1.50E-22    | 0.804526341  | 6.57E-57 | -0.382337006 | 5.99E-10    |
| -0.452515117 | 9.04E-14    | -0.585173871 | 6.58E-24 | 0.292484812  | 3.21E-06    |
| -0.339560917 | 5.02E-08    | -0.351479128 | 1.56E-08 | 0.236120965  | 0.000191591 |
| 0.746160916  | 7.97E-45    | 0.6646007    | 1.35E-32 | -0.349656292 | 1.87E-08    |
| -0.456228395 | 5.35E-14    | -0.621893805 | 1.29E-27 | 0.277835321  | 1.02E-05    |
| -0.192542981 | 0.00247212  | -0.555290567 | 3.21E-21 | 0.714437524  | 1.47E-39    |
| -0.288788695 | 4.32E-06    | -0.412681203 | 1.71E-11 | 0.606255022  | 5.60E-26    |
| 0.387513946  | 3.35E-10    | 0.62810022   | 2.72E-28 | -0.326028551 | 1.79E-07    |
| 0.615616769  | 6.00E-27    | 0.497709459  | 9.70E-17 | -0.120507871 | 0.059636742 |
| 0.375416945  | 1.28E-09    | 0.670668417  | 2.26E-33 | -0.139094791 | 0.029507786 |
| -0.467997066 | 9.73E-15    | -0.593692485 | 1.00E-24 | 0.348063565  | 2.19E-08    |
| 0.573629472  | 7.75E-23    | 0.882821939  | 1.04E-81 | -0.346324187 | 2.60E-08    |
| 0.651487308  | 5.54E-31    | 0.677618396  | 2.77E-34 | -0.287609645 | 4.74E-06    |
| -0.309692029 | 7.62E-07    | -0.609424396 | 2.65E-26 | 0.443990829  | 2.94E-13    |
| 0.451554668  | 1.03E-13    | 0.549047578  | 1.08E-20 | -0.251983215 | 6.65E-05    |
| 0.564160642  | 5.46E-22    | 0.864669923  | 1.30E-74 | -0.324344861 | 2.08E-07    |
| 0.795257665  | 9.89E-55    | 0.808396289  | 7.47E-58 | -0.269217874 | 1.94E-05    |
| -0.265570531 | 2.54E-05    | -0.39119661  | 2.20E-10 | 0.201335244  | 0.001536077 |
| 0.336112154  | 6.98E-08    | 0.710763931  | 5.37E-39 | -0.1314576   | 0.039778184 |
| -0.289195559 | 4.18E-06    | -0.608678129 | 3.16E-26 | 0.361508274  | 5.61E-09    |
| 0.497062557  | 1.08E-16    | 0.581921338  | 1.33E-23 | -0.245632497 | 0.000102423 |
| 0.508906448  | 1.52E-17    | 0.683119512  | 5.06E-35 | -0.22566392  | 0.000370618 |
| 0.492391663  | 2.29E-16    | 0.86722355   | 1.51E-75 | -0.348556433 | 2.09E-08    |
| 0.342653172  | 3.72E-08    | 0.517969284  | 3.21E-18 | -0.142825193 | 0.025377418 |
| 0.711603764  | 4.00E-39    | 0.701480324  | 1.30E-37 | -0.111116577 | 0.082610896 |

|              |             |              |          |              |             |
|--------------|-------------|--------------|----------|--------------|-------------|
| -0.403233971 | 5.38E-11    | -0.431039325 | 1.66E-12 | 0.388719743  | 2.92E-10    |
| -0.270916058 | 1.71E-05    | -0.466334533 | 1.24E-14 | 0.542592798  | 3.71E-20    |
| -0.207999484 | 0.001056812 | -0.492266169 | 2.33E-16 | 0.379456345  | 8.24E-10    |
| 0.641317115  | 8.76E-30    | 0.797976209  | 2.34E-55 | -0.136529276 | 0.032670872 |
| -0.329564549 | 1.29E-07    | -0.413336872 | 1.58E-11 | -0.216749096 | 0.000635462 |
| -0.034931557 | 0.586348397 | -0.411118827 | 2.07E-11 | 0.259064013  | 4.05E-05    |
| -0.435953358 | 8.70E-13    | -0.680558106 | 1.12E-34 | 0.344184913  | 3.21E-08    |
| 0.654003404  | 2.76E-31    | 0.892801983  | 3.92E-86 | -0.323217122 | 2.31E-07    |
| 0.13702428   | 0.032039035 | -0.283317141 | 6.65E-06 | 0.237777077  | 0.000172108 |
| -0.407497124 | 3.22E-11    | -0.575065719 | 5.73E-23 | 0.673286639  | 1.03E-33    |
| 0.52936131   | 4.27E-19    | 0.655935166  | 1.60E-31 | -0.368749788 | 2.63E-09    |
| 0.358826358  | 7.40E-09    | 0.748311367  | 3.28E-45 | -0.242407895 | 0.000127007 |
| 0.585391983  | 6.27E-24    | 0.628356032  | 2.55E-28 | -0.288567544 | 4.40E-06    |
| -0.25902879  | 4.06E-05    | -0.481226938 | 1.32E-15 | 0.576382349  | 4.34E-23    |
| -0.204927493 | 0.001257445 | -0.468774396 | 8.67E-15 | 0.479316918  | 1.77E-15    |
| -0.591187228 | 1.75E-24    | -0.669075433 | 3.62E-33 | 0.342690649  | 3.71E-08    |
| -0.351513653 | 1.55E-08    | -0.529687834 | 4.02E-19 | 0.563652981  | 6.05E-22    |
| 0.425561762  | 3.38E-12    | 0.770898426  | 1.66E-49 | -0.335535651 | 7.37E-08    |
| -0.395053789 | 1.41E-10    | -0.413244764 | 1.60E-11 | 0.282656691  | 7.00E-06    |
| -0.486692098 | 5.65E-16    | -0.549986204 | 9.04E-21 | 0.070739077  | 0.270043886 |
| -0.337796017 | 5.94E-08    | -0.526507891 | 7.12E-19 | 0.192249635  | 0.002510824 |
| 0.50381087   | 3.56E-17    | 0.492677924  | 2.19E-16 | -0.210303704 | 0.000926126 |
| 0.52558364   | 8.40E-19    | 0.793305631  | 2.75E-54 | -0.384880318 | 4.51E-10    |
| -0.237462408 | 0.000175661 | -0.475560219 | 3.14E-15 | 0.484963385  | 7.40E-16    |
| 0.812269923  | 8.06E-59    | 0.806622793  | 2.04E-57 | -0.266331283 | 2.40E-05    |
| -0.267417976 | 2.22E-05    | -0.558735104 | 1.62E-21 | 0.166740325  | 0.008925813 |
| 0.704638867  | 4.47E-38    | 0.648378487  | 1.30E-30 | -0.101769569 | 0.112076796 |
| 0.5492151    | 1.05E-20    | 0.829681171  | 1.85E-63 | -0.389693721 | 2.61E-10    |
| 0.492893377  | 2.11E-16    | 0.766098357  | 1.49E-48 | -0.169673179 | 0.007778197 |
| 0.368113868  | 2.81E-09    | 0.690545745  | 4.79E-36 | -0.233984926 | 0.000219766 |
| 0.539223605  | 6.98E-20    | 0.61208198   | 1.41E-26 | -0.298927578 | 1.89E-06    |
| 0.468542451  | 8.97E-15    | 0.684542725  | 3.24E-35 | -0.486053973 | 6.24E-16    |
| -0.219345224 | 0.000544315 | -0.612641883 | 1.23E-26 | 0.26902761   | 1.97E-05    |
| -0.446412062 | 2.11E-13    | -0.541734003 | 4.36E-20 | -0.078528942 | 0.22065865  |
| 0.651126075  | 6.13E-31    | 0.666978252  | 6.72E-33 | -0.140969082 | 0.027365819 |
| -0.075466377 | 0.239245911 | -0.544092665 | 2.79E-20 | 0.518454209  | 2.95E-18    |
| 0.651720858  | 5.20E-31    | 0.790269282  | 1.32E-53 | -0.497251593 | 1.05E-16    |
| 0.712915916  | 2.52E-39    | 0.702577744  | 9.01E-38 | -0.171550074 | 0.007114588 |
| 0.360220591  | 6.41E-09    | 0.671587461  | 1.72E-33 | -0.341925131 | 4.00E-08    |
| 0.040093923  | 0.532226432 | -0.277527854 | 1.04E-05 | 0.21718232   | 0.000619331 |

|              |             |              |           |              |             |
|--------------|-------------|--------------|-----------|--------------|-------------|
| 0.405549778  | 4.08E-11    | 0.536754312  | 1.10E-19  | -0.189202493 | 0.002946706 |
| 0.520823946  | 1.95E-18    | 0.824297957  | 5.69E-62  | -0.49364172  | 1.87E-16    |
| -0.477888532 | 2.20E-15    | -0.575102761 | 5.69E-23  | 0.154962794  | 0.015189437 |
| -0.532261051 | 2.52E-19    | -0.451646037 | 1.02E-13  | 0.416423012  | 1.08E-11    |
| 0.637601982  | 2.34E-29    | 0.823088547  | 1.21E-61  | -0.393114473 | 1.77E-10    |
| 0.74255167   | 3.46E-44    | 0.894875555  | 4.16E-87  | -0.403582799 | 5.16E-11    |
| 0.665654822  | 9.90E-33    | 0.884755326  | 1.56E-82  | -0.345537554 | 2.81E-08    |
| 0.582372287  | 1.21E-23    | 0.689942215  | 5.82E-36  | -0.393999649 | 1.59E-10    |
| 0.502142697  | 4.69E-17    | 0.721491146  | 1.15E-40  | -0.44873572  | 1.53E-13    |
| 0.42784602   | 2.52E-12    | 0.793234621  | 2.86E-54  | -0.494595214 | 1.61E-16    |
| 0.700439536  | 1.85E-37    | 0.558708849  | 1.63E-21  | -0.457864543 | 4.24E-14    |
| 0.63790344   | 2.16E-29    | 0.808806144  | 5.92E-58  | -0.168120366 | 0.008368305 |
| -0.384288395 | 4.82E-10    | -0.689634492 | 6.42E-36  | 0.430561528  | 1.77E-12    |
| 0.838522942  | 5.05E-66    | 0.903761621  | 1.59E-91  | -0.41476     | 1.32E-11    |
| 0.72148591   | 1.15E-40    | 0.815590236  | 1.15E-59  | -0.368376028 | 2.73E-09    |
| 0.682370048  | 6.39E-35    | 0.923005261  | 8.95E-103 | -0.4199914   | 6.88E-12    |
| 0.800165696  | 7.18E-56    | 0.843697104  | 1.35E-67  | -0.470654804 | 6.56E-15    |
| 0.610147761  | 2.23E-26    | 0.894041863  | 1.03E-86  | -0.470531806 | 6.68E-15    |
| 0.590255716  | 2.15E-24    | 0.872188315  | 2.02E-77  | -0.328115963 | 1.47E-07    |
| 0.797793454  | 2.58E-55    | 0.853696452  | 8.35E-71  | -0.327920578 | 1.50E-07    |
| 0.677926965  | 2.52E-34    | 0.819084435  | 1.41E-60  | -0.261858454 | 3.32E-05    |
| 0.485334306  | 6.98E-16    | 0.80413811   | 8.15E-57  | -0.216759996 | 0.000635051 |
| 0.3245684    | 2.04E-07    | 0.711794385  | 3.74E-39  | -0.162540067 | 0.01083081  |
| 0.569957357  | 1.66E-22    | 0.806805256  | 1.84E-57  | -0.383296261 | 5.38E-10    |
| 0.586091529  | 5.38E-24    | 0.781211041  | 1.23E-51  | -0.153294897 | 0.016333174 |
| -0.408867923 | 2.73E-11    | -0.401941998 | 6.28E-11  | 0.53066629   | 3.37E-19    |
| -0.194625453 | 0.002212585 | -0.494798041 | 1.56E-16  | 0.464208246  | 1.70E-14    |
| 0.618908764  | 2.69E-27    | 0.862536722  | 7.58E-74  | -0.377482328 | 1.02E-09    |
| -0.076458976 | 0.233105161 | -0.438653024 | 6.06E-13  | 0.649382719  | 9.90E-31    |
| -0.31008383  | 7.37E-07    | -0.512240585 | 8.62E-18  | 0.541556428  | 4.51E-20    |
| 0.106581529  | 0.096017037 | 0.342743172  | 3.69E-08  | -0.420773694 | 6.23E-12    |
| 0.001082835  | 0.986546411 | -0.357729383 | 8.29E-09  | 0.499199344  | 7.61E-17    |
| 0.772533691  | 7.75E-50    | 0.872990764  | 9.91E-78  | -0.333972351 | 8.54E-08    |
| -0.289535355 | 4.07E-06    | -0.58821257  | 3.38E-24  | 0.708893079  | 1.03E-38    |
| -0.349089198 | 1.98E-08    | -0.682856578 | 5.49E-35  | 0.3129529    | 5.75E-07    |
| -0.506407824 | 2.31E-17    | -0.628478768 | 2.47E-28  | 0.33077272   | 1.15E-07    |
| -0.275693749 | 1.20E-05    | -0.612769041 | 1.19E-26  | 0.22098724   | 0.000493082 |
| 0.349094719  | 1.98E-08    | 0.598517305  | 3.35E-25  | -0.160233522 | 0.012022836 |
| 0.505114206  | 2.87E-17    | 0.711729972  | 3.83E-39  | -0.277180959 | 1.07E-05    |
| -0.442150443 | 3.78E-13    | -0.685272164 | 2.57E-35  | 0.497767698  | 9.61E-17    |

|              |             |              |           |              |             |
|--------------|-------------|--------------|-----------|--------------|-------------|
| 0.128650616  | 0.044244181 | 0.503115383  | 4.00E-17  | -0.49370751  | 1.85E-16    |
| 0.627698364  | 3.01E-28    | 0.83250707   | 2.90E-64  | -0.355152348 | 1.08E-08    |
| 0.640763477  | 1.01E-29    | 0.927715295  | 5.60E-106 | -0.454399052 | 6.94E-14    |
| 0.632653747  | 8.48E-29    | 0.920705719  | 2.77E-101 | -0.460195528 | 3.03E-14    |
| -0.3673913   | 3.03E-09    | -0.769929575 | 2.59E-49  | 0.609075881  | 2.88E-26    |
| 0.544537311  | 2.57E-20    | 0.809027114  | 5.22E-58  | -0.271249368 | 1.67E-05    |
| 0.307623952  | 9.11E-07    | 0.60880387   | 3.07E-26  | -0.257155508 | 4.64E-05    |
| 0.429675976  | 1.99E-12    | 0.794403759  | 1.55E-54  | -0.360840426 | 6.02E-09    |
| 0.591662984  | 1.57E-24    | 0.801907753  | 2.78E-56  | -0.16718086  | 0.008744366 |
| 0.575739502  | 4.97E-23    | 0.712888823  | 2.54E-39  | -0.296057572 | 2.40E-06    |
| -0.374160851 | 1.47E-09    | -0.495342098 | 1.42E-16  | 0.456096057  | 5.45E-14    |
| -0.473779817 | 4.11E-15    | -0.424925641 | 3.67E-12  | 0.143281985  | 0.024907568 |
| 0.436356234  | 8.24E-13    | 0.763513149  | 4.76E-48  | -0.268613116 | 2.03E-05    |
| 0.699684472  | 2.38E-37    | 0.638072363  | 2.07E-29  | -0.506744903 | 2.18E-17    |
| 0.785689739  | 1.34E-52    | 0.652147645  | 4.62E-31  | -0.392016724 | 2.00E-10    |
| -0.37168014  | 1.92E-09    | -0.693190428 | 2.03E-36  | 0.363838608  | 4.41E-09    |
| 0.523254251  | 1.27E-18    | 0.901235195  | 3.17E-90  | -0.334646663 | 8.01E-08    |
| 0.404624122  | 4.56E-11    | 0.45576391   | 5.72E-14  | -0.269329973 | 1.93E-05    |
| 0.417719352  | 9.15E-12    | 0.799030118  | 1.33E-55  | -0.459595121 | 3.31E-14    |
| 0.436872463  | 7.69E-13    | 0.785323349  | 1.61E-52  | -0.235266154 | 0.000202435 |
| 0.64551034   | 2.84E-30    | 0.706433062  | 2.42E-38  | -0.03465612  | 0.5893059   |
| 0.294494831  | 2.73E-06    | 0.672324596  | 1.38E-33  | -0.200078251 | 0.001646215 |
| 0.759090398  | 3.35E-47    | 0.848200242  | 5.18E-69  | -0.311343948 | 6.61E-07    |
| 0.38706825   | 3.52E-10    | 0.526256068  | 7.45E-19  | -0.309983766 | 7.43E-07    |
| -0.203167049 | 0.001387616 | -0.520502826 | 2.06E-18  | 0.292375146  | 3.24E-06    |
| 0.228664859  | 0.000307619 | 0.283233797  | 6.69E-06  | -0.103262519 | 0.106883345 |
| -0.326212946 | 1.76E-07    | -0.513389308 | 7.08E-18  | 0.282796536  | 6.93E-06    |
| -0.262591021 | 3.15E-05    | -0.568181724 | 2.40E-22  | 0.567886242  | 2.55E-22    |
| 0.66487994   | 1.24E-32    | 0.689768957  | 6.15E-36  | -0.381178438 | 6.81E-10    |
| -0.374200757 | 1.46E-09    | -0.697084168 | 5.66E-37  | 0.441859126  | 3.93E-13    |
| -0.222038619 | 0.000462665 | -0.5454003   | 2.18E-20  | 0.599003934  | 3.00E-25    |
| 0.077113383  | 0.229117907 | -0.476601735 | 2.68E-15  | 0.407634143  | 3.17E-11    |
| 0.653417177  | 3.24E-31    | 0.844695247  | 6.61E-68  | -0.306931282 | 9.66E-07    |
| 0.531039604  | 3.15E-19    | 0.548908866  | 1.11E-20  | -0.087011754 | 0.174603216 |
| 0.597230492  | 4.50E-25    | 0.718061817  | 4.00E-40  | -0.216962716 | 0.00062746  |
| -0.333274667 | 9.12E-08    | -0.319819344 | 3.13E-07  | 0.51037335   | 1.18E-17    |
| 0.427756896  | 2.55E-12    | 0.731718379  | 2.46E-42  | -0.576960631 | 3.84E-23    |
| 0.600094805  | 2.34E-25    | 0.850685106  | 8.18E-70  | -0.247944031 | 8.76E-05    |
| -0.095085797 | 0.137787358 | -0.337056746 | 6.38E-08  | 0.408647291  | 2.80E-11    |
| 0.597145142  | 4.59E-25    | 0.663418869  | 1.90E-32  | -0.243035317 | 0.000121828 |



|              |             |              |          |              |             |
|--------------|-------------|--------------|----------|--------------|-------------|
| 0.852920879  | 1.51E-70    | 0.780967258  | 1.39E-51 | -0.184127014 | 0.003827098 |
| 0.596498537  | 5.31E-25    | 0.799477355  | 1.04E-55 | -0.355544752 | 1.04E-08    |
| 0.347284611  | 2.37E-08    | 0.549150299  | 1.06E-20 | -0.344047493 | 3.25E-08    |
| -0.051454229 | 0.422669482 | -0.456585288 | 5.09E-14 | 0.341452427  | 4.18E-08    |
| 0.622022755  | 1.25E-27    | 0.909089914  | 2.20E-94 | -0.339527301 | 5.04E-08    |
| 0.322745534  | 2.41E-07    | 0.663670152  | 1.76E-32 | -0.314303245 | 5.11E-07    |
| 0.053090785  | 0.408046588 | 0.383521347  | 5.25E-10 | -0.442184868 | 3.76E-13    |
| -0.494514908 | 1.63E-16    | -0.791179384 | 8.28E-54 | 0.280892015  | 8.03E-06    |
| 0.54600488   | 1.94E-20    | 0.845737491  | 3.12E-68 | -0.389420204 | 2.70E-10    |
| 0.053377895  | 0.405512457 | -0.286300799 | 5.26E-06 | 0.2939889    | 2.84E-06    |
| 0.447743658  | 1.76E-13    | 0.612487375  | 1.28E-26 | -0.286581501 | 5.15E-06    |
| 0.208969762  | 0.000999842 | 0.579849925  | 2.08E-23 | -0.432117384 | 1.44E-12    |
| 0.701704598  | 1.21E-37    | 0.778618353  | 4.32E-51 | -0.382047838 | 6.18E-10    |
| 0.843262664  | 1.84E-67    | 0.890281621  | 5.63E-85 | -0.351150732 | 1.61E-08    |
| 0.772456372  | 8.03E-50    | 0.757232278  | 7.51E-47 | -0.28919994  | 4.18E-06    |
| 0.385659912  | 4.13E-10    | 0.55328988   | 4.75E-21 | -0.231505867 | 0.000257298 |
| -0.411365339 | 2.01E-11    | -0.739515763 | 1.17E-43 | 0.434056146  | 1.12E-12    |
| -0.177868545 | 0.005236005 | -0.576855599 | 3.93E-23 | 0.39344312   | 1.70E-10    |
| 0.588030629  | 3.52E-24    | 0.566365638  | 3.48E-22 | -0.308506204 | 8.44E-07    |
| -0.464789153 | 1.56E-14    | -0.676285872 | 4.16E-34 | 0.36640862   | 3.36E-09    |
| -0.1480208   | 0.020458794 | -0.358450618 | 7.70E-09 | 0.372331396  | 1.79E-09    |
| -0.319062111 | 3.35E-07    | -0.512203308 | 8.67E-18 | 0.526171984  | 7.56E-19    |
| -0.542343997 | 3.89E-20    | -0.592095891 | 1.43E-24 | 0.375879692  | 1.22E-09    |
| 0.659684713  | 5.54E-32    | 0.829934623  | 1.57E-63 | -0.291667017 | 3.43E-06    |
| -0.302480688 | 1.41E-06    | -0.623924157 | 7.77E-28 | 0.363207451  | 4.71E-09    |
| -0.256969437 | 4.70E-05    | -0.519673919 | 2.39E-18 | 0.45773485   | 4.32E-14    |
| -0.10816614  | 0.091148647 | -0.567478084 | 2.77E-22 | 0.354826398  | 1.11E-08    |
| 0.662638504  | 2.38E-32    | 0.709814441  | 7.49E-39 | -0.342928731 | 3.63E-08    |
| -0.094696942 | 0.139411895 | -0.410390541 | 2.27E-11 | 0.456187019  | 5.38E-14    |
| -0.078206728 | 0.222564329 | -0.476612669 | 2.68E-15 | 0.346056085  | 2.67E-08    |
| 0.495724922  | 1.34E-16    | 0.808245031  | 8.14E-58 | -0.251102248 | 7.06E-05    |
| 0.269447946  | 1.91E-05    | 0.564378627  | 5.22E-22 | -0.161936274 | 0.011132309 |
| 0.378839924  | 8.82E-10    | 0.442090865  | 3.81E-13 | -0.029884133 | 0.641593126 |
| -0.443844886 | 3.00E-13    | -0.815669014 | 1.10E-59 | 0.523482082  | 1.22E-18    |
| -0.230459646 | 0.000274862 | -0.361456993 | 5.64E-09 | 0.624572776  | 6.61E-28    |
| 0.369402676  | 2.45E-09    | 0.469726423  | 7.53E-15 | -0.083718531 | 0.191554377 |
| -0.273830051 | 1.38E-05    | -0.452764946 | 8.73E-14 | 0.311960872  | 6.26E-07    |
| -0.145925333 | 0.022333075 | -0.337382665 | 6.18E-08 | 0.654583162  | 2.34E-31    |
| 0.49559323   | 1.37E-16    | 0.709150498  | 9.43E-39 | -0.232132337 | 0.000247287 |
| -0.191737879 | 0.002579666 | -0.514435542 | 5.92E-18 | 0.400540632  | 7.41E-11    |

|              |             |              |          |              |             |
|--------------|-------------|--------------|----------|--------------|-------------|
| -0.249294582 | 7.99E-05    | -0.576007021 | 4.70E-23 | 0.188270573  | 0.003093104 |
| 0.391211766  | 2.20E-10    | 0.666148851  | 8.57E-33 | -0.444969465 | 2.58E-13    |
| 0.659159564  | 6.44E-32    | 0.780698852  | 1.58E-51 | -0.222476603 | 0.000450514 |
| 0.714285881  | 1.55E-39    | 0.751139348  | 1.01E-45 | -0.26408664  | 2.83E-05    |
| 0.472270291  | 5.15E-15    | 0.688721683  | 8.60E-36 | -0.364543434 | 4.09E-09    |
| 0.666499935  | 7.73E-33    | 0.778678413  | 4.20E-51 | -0.27735427  | 1.05E-05    |
| 0.836426108  | 2.11E-65    | 0.813635992  | 3.63E-59 | -0.210947268 | 0.000892382 |
| -0.291675035 | 3.43E-06    | -0.553087792 | 4.95E-21 | 0.436565465  | 8.02E-13    |
| 0.433719553  | 1.17E-12    | 0.668456892  | 4.35E-33 | -0.355430115 | 1.05E-08    |
| 0.181110124  | 0.004456783 | 0.506375989  | 2.32E-17 | -0.516011877 | 4.51E-18    |
| -0.33975461  | 4.93E-08    | -0.651287175 | 5.86E-31 | 0.376756425  | 1.11E-09    |
| 0.501242331  | 5.44E-17    | 0.48536454   | 6.95E-16 | -0.231387015 | 0.000259239 |
| -0.310562361 | 7.07E-07    | -0.516834039 | 3.91E-18 | 0.532755466  | 2.30E-19    |
| 0.703595337  | 6.38E-38    | 0.707250833  | 1.82E-38 | -0.129612214 | 0.042669092 |
| -0.334912076 | 7.82E-08    | -0.492716799 | 2.17E-16 | 0.043585607  | 0.497102048 |
| -0.348009265 | 2.20E-08    | -0.652706785 | 3.95E-31 | 0.649670848  | 9.15E-31    |
| -0.271293398 | 1.66E-05    | -0.539534604 | 6.59E-20 | 0.172414654  | 0.006826263 |
| 0.012025518  | 0.851446363 | -0.428234041 | 2.40E-12 | 0.360991214  | 5.92E-09    |
| -0.380669642 | 7.21E-10    | -0.51814956  | 3.11E-18 | 0.491213606  | 2.76E-16    |
| -0.32858066  | 1.41E-07    | -0.462874954 | 2.06E-14 | 0.447276931  | 1.87E-13    |
| -0.613384875 | 1.03E-26    | -0.80364823  | 1.07E-56 | 0.377396132  | 1.03E-09    |
| 0.394327867  | 1.53E-10    | 0.590224106  | 2.17E-24 | -0.297846316 | 2.07E-06    |
| 0.614939404  | 7.08E-27    | 0.686285971  | 1.87E-35 | -0.243074056 | 0.000121515 |
| -0.336207439 | 6.91E-08    | -0.332762218 | 9.57E-08 | 0.370325984  | 2.22E-09    |
| -0.376369315 | 1.16E-09    | -0.690311977 | 5.16E-36 | 0.472894822  | 4.69E-15    |
| 0.488951344  | 3.95E-16    | 0.895232812  | 2.82E-87 | -0.462808997 | 2.08E-14    |
| 0.688499456  | 9.24E-36    | 0.82780731   | 6.17E-63 | -0.182634742 | 0.004127762 |
| 0.667294029  | 6.12E-33    | 0.707765625  | 1.53E-38 | -0.172557732 | 0.006779568 |
| 0.460945347  | 2.72E-14    | 0.650382772  | 7.52E-31 | 0.022390861  | 0.727296679 |
| 0.703957645  | 5.64E-38    | 0.676267868  | 4.19E-34 | -0.410999567 | 2.10E-11    |
| 0.482579903  | 1.07E-15    | 0.616098147  | 5.34E-27 | -0.239078686 | 0.000158113 |
| -0.360642439 | 6.14E-09    | -0.63055094  | 1.45E-28 | 0.631363247  | 1.18E-28    |
| -0.315050951 | 4.78E-07    | -0.520627982 | 2.02E-18 | 0.517138183  | 3.71E-18    |
| 0.333268735  | 9.12E-08    | 0.365263143  | 3.79E-09 | -0.011951812 | 0.852346436 |
| -0.383186848 | 5.45E-10    | -0.511160054 | 1.04E-17 | 0.164186006  | 0.010045247 |
| -0.418030018 | 8.80E-12    | -0.517369314 | 3.56E-18 | 0.194862568  | 0.002184665 |
| 0.278678174  | 9.52E-06    | 0.520566859  | 2.04E-18 | -0.368315655 | 2.75E-09    |
| 0.728014196  | 1.01E-41    | 0.853668654  | 8.53E-71 | -0.483870414 | 8.77E-16    |
| 0.373545591  | 1.57E-09    | 0.630139613  | 1.62E-28 | -0.398031735 | 9.96E-11    |
| 0.280437966  | 8.32E-06    | 0.623263121  | 9.17E-28 | -0.148238723 | 0.020271935 |

|              |             |              |          |              |             |
|--------------|-------------|--------------|----------|--------------|-------------|
| 0.369745576  | 2.36E-09    | 0.624696991  | 6.41E-28 | -0.31082352  | 6.91E-07    |
| -0.311187303 | 6.70E-07    | -0.60771027  | 3.98E-26 | 0.252285427  | 6.51E-05    |
| -0.453376024 | 8.01E-14    | -0.795776187 | 7.52E-55 | 0.460581344  | 2.87E-14    |
| -0.389732715 | 2.60E-10    | -0.611039614 | 1.81E-26 | 0.713856316  | 1.80E-39    |
| -0.076982255 | 0.229912971 | -0.495893562 | 1.30E-16 | 0.296452495  | 2.32E-06    |
| 0.500290019  | 6.37E-17    | 0.601891857  | 1.55E-25 | -0.386228751 | 3.87E-10    |
| 0.506420701  | 2.30E-17    | 0.768992266  | 3.99E-49 | -0.291480896 | 3.48E-06    |
| 0.122203385  | 0.056111503 | 0.407765827  | 3.12E-11 | -0.395658841 | 1.31E-10    |
| 0.577390983  | 3.51E-23    | 0.915659804  | 3.64E-98 | -0.431177328 | 1.63E-12    |
| -0.464082713 | 1.73E-14    | -0.524977858 | 9.36E-19 | 0.095944439  | 0.134251581 |
| 0.280812851  | 8.08E-06    | 0.748534574  | 2.99E-45 | -0.261801002 | 3.33E-05    |
| -0.405603166 | 4.05E-11    | -0.577210202 | 3.64E-23 | 0.355467262  | 1.04E-08    |
| 0.685364426  | 2.50E-35    | 0.873517782  | 6.19E-78 | -0.422377631 | 5.08E-12    |
| 0.645915119  | 2.55E-30    | 0.517753075  | 3.33E-18 | -0.226878276 | 0.000343805 |
| -0.196521489 | 0.001998132 | -0.428568109 | 2.29E-12 | 0.326175465  | 1.76E-07    |
| -0.448592738 | 1.56E-13    | -0.490828571 | 2.94E-16 | 0.037286519  | 0.561345821 |
| 0.340084901  | 4.77E-08    | 0.572609875  | 9.59E-23 | -0.266442026 | 2.38E-05    |
| 0.571738693  | 1.15E-22    | 0.565656108  | 4.03E-22 | -0.257334027 | 4.58E-05    |
| 0.356253736  | 9.63E-09    | 0.559052656  | 1.52E-21 | -0.128450635 | 0.044577801 |
| 0.541050299  | 4.96E-20    | 0.825348608  | 2.94E-62 | -0.381199535 | 6.80E-10    |
| 0.362097341  | 5.28E-09    | 0.770576968  | 1.92E-49 | -0.213085745 | 0.000788221 |
| 0.545947912  | 1.96E-20    | 0.752096269  | 6.74E-46 | -0.191689357 | 0.002586282 |
| 0.577091112  | 3.74E-23    | 0.723668593  | 5.13E-41 | -0.228080403 | 0.000319047 |
| 0.604208049  | 9.03E-26    | 0.829717422  | 1.80E-63 | -0.324888285 | 1.98E-07    |
| 0.540902858  | 5.10E-20    | 0.733430362  | 1.27E-42 | -0.347165842 | 2.39E-08    |
| 0.488946356  | 3.96E-16    | 0.622188988  | 1.20E-27 | -0.283488724 | 6.56E-06    |
| 0.674811428  | 6.51E-34    | 0.849174616  | 2.52E-69 | -0.398750817 | 9.15E-11    |
| -0.283605917 | 6.50E-06    | -0.338133908 | 5.76E-08 | 0.500547498  | 6.10E-17    |
| -0.325359748 | 1.90E-07    | -0.422472638 | 5.02E-12 | 0.194104534  | 0.002275068 |
| 0.856218976  | 1.19E-71    | 0.737146838  | 2.99E-43 | -0.161076955 | 0.011574173 |
| -0.574410441 | 6.58E-23    | -0.434914682 | 9.98E-13 | -0.005804163 | 0.927980739 |
| 0.578981809  | 2.50E-23    | 0.747188715  | 5.22E-45 | -0.293578127 | 2.94E-06    |
| -0.363054283 | 4.78E-09    | -0.338721265 | 5.44E-08 | 0.146671075  | 0.021649707 |
| 0.751637023  | 8.18E-46    | 0.759678181  | 2.59E-47 | -0.202948931 | 0.001404577 |
| 0.250581747  | 7.32E-05    | 0.474687929  | 3.58E-15 | -0.397103169 | 1.11E-10    |
| 0.463268298  | 1.95E-14    | 0.478557841  | 1.99E-15 | -0.167895206 | 0.008457097 |
| -0.202096455 | 0.001472702 | -0.419365492 | 7.44E-12 | 0.456152603  | 5.41E-14    |
| -0.242961931 | 0.000122423 | -0.506824849 | 2.15E-17 | 0.492172781  | 2.37E-16    |
| -0.326928944 | 1.64E-07    | -0.536450504 | 1.17E-19 | 0.316826747  | 4.09E-07    |
| 0.626215892  | 4.37E-28    | 0.896602485  | 6.21E-88 | -0.529953551 | 3.83E-19    |

|              |             |              |          |              |             |
|--------------|-------------|--------------|----------|--------------|-------------|
| -0.107195908 | 0.09410549  | -0.477025652 | 2.51E-15 | 0.534821496  | 1.58E-19    |
| -0.19467587  | 0.002206621 | -0.441303504 | 4.24E-13 | 0.438326515  | 6.33E-13    |
| -0.325050483 | 1.95E-07    | -0.621479622 | 1.43E-27 | 0.387846456  | 3.23E-10    |
| 0.488517772  | 4.23E-16    | 0.654165853  | 2.63E-31 | -0.322921006 | 2.37E-07    |
| -0.269515268 | 1.90E-05    | -0.638645991 | 1.78E-29 | 0.239294976  | 0.000155893 |
| 0.288059219  | 4.58E-06    | 0.629965905  | 1.69E-28 | -0.191994156 | 0.00254498  |
| -0.285179664 | 5.75E-06    | -0.651300672 | 5.84E-31 | 0.396766128  | 1.16E-10    |
| -0.505189032 | 2.83E-17    | -0.759955714 | 2.29E-47 | 0.302612885  | 1.39E-06    |
| -0.579897459 | 2.06E-23    | -0.823061889 | 1.23E-61 | 0.455170766  | 6.22E-14    |
| -0.319698424 | 3.17E-07    | -0.677963027 | 2.49E-34 | 0.228710456  | 0.000306744 |
| -0.243192936 | 0.000120558 | -0.534115843 | 1.80E-19 | 0.357394893  | 8.57E-09    |
| -0.237558852 | 0.000174565 | -0.561210152 | 9.90E-22 | 0.464834167  | 1.55E-14    |
| -0.196807494 | 0.001967482 | -0.6325572   | 8.69E-29 | 0.324841389  | 1.99E-07    |
| 0.615710293  | 5.87E-27    | 0.665778394  | 9.55E-33 | -0.229847818 | 0.000285645 |
| -0.169165694 | 0.007966845 | -0.499946713 | 6.73E-17 | 0.553885937  | 4.23E-21    |
| 0.49654456   | 1.17E-16    | 0.753837234  | 3.22E-46 | -0.271808535 | 1.60E-05    |
| 0.58811436   | 3.45E-24    | 0.452034528  | 9.67E-14 | -0.190355501 | 0.002774287 |
| 0.28182511   | 7.47E-06    | 0.680863924  | 1.02E-34 | -0.556602911 | 2.48E-21    |
| -0.307640219 | 9.09E-07    | -0.472681364 | 4.84E-15 | 0.358785365  | 7.44E-09    |
| -0.382255205 | 6.04E-10    | -0.505738684 | 2.58E-17 | 0.51779065   | 3.31E-18    |
| 0.777469708  | 7.51E-51    | 0.866083673  | 3.97E-75 | -0.332814715 | 9.52E-08    |
| 0.545151757  | 2.28E-20    | 0.619933646  | 2.09E-27 | -0.030878442 | 0.630539929 |
| 0.357377478  | 8.59E-09    | 0.738114729  | 2.04E-43 | -0.271320345 | 1.66E-05    |
| 0.6894812    | 6.74E-36    | 0.913834918  | 4.38E-97 | -0.318883371 | 3.40E-07    |
| -0.274443943 | 1.31E-05    | -0.603277044 | 1.12E-25 | 0.699641049  | 2.42E-37    |
| 0.5663861    | 3.47E-22    | 0.699362567  | 2.66E-37 | -0.368584296 | 2.67E-09    |
| 0.283617899  | 6.50E-06    | 0.617740754  | 3.58E-27 | -0.199447564 | 0.001704155 |
| 0.533191784  | 2.13E-19    | 0.592651686  | 1.26E-24 | -0.200875506 | 0.001575553 |
| 0.149097013  | 0.019550311 | 0.53906256   | 7.19E-20 | -0.357358115 | 8.61E-09    |
| -0.250542604 | 7.34E-05    | -0.577393975 | 3.50E-23 | 0.485786859  | 6.51E-16    |
| -0.395737934 | 1.30E-10    | -0.681896865 | 7.41E-35 | 0.419514928  | 7.31E-12    |
| -0.442971237 | 3.38E-13    | -0.592104695 | 1.43E-24 | 0.104438464  | 0.102927623 |
| -0.385569703 | 4.17E-10    | -0.633330767 | 7.12E-29 | 0.567132589  | 2.98E-22    |
| 0.523136749  | 1.30E-18    | 0.871603137  | 3.40E-77 | -0.405412561 | 4.15E-11    |
| 0.502695504  | 4.28E-17    | 0.781842971  | 9.03E-52 | -0.31578281  | 4.48E-07    |
| 0.659104973  | 6.54E-32    | 0.664781364  | 1.28E-32 | -0.071295127 | 0.266287182 |
| 0.531062968  | 3.13E-19    | 0.66147305   | 3.32E-32 | -0.434707814 | 1.03E-12    |
| -0.376427829 | 1.15E-09    | -0.713363577 | 2.15E-39 | 0.548310003  | 1.25E-20    |
| 0.075586579  | 0.238496299 | 0.386426945  | 3.79E-10 | -0.069056747 | 0.281629028 |
| 0.425105072  | 3.59E-12    | 0.432478087  | 1.38E-12 | -0.335237836 | 7.58E-08    |

|              |             |              |          |              |             |
|--------------|-------------|--------------|----------|--------------|-------------|
| -0.244030972 | 0.000114014 | -0.57400842  | 7.16E-23 | 0.249573686  | 7.84E-05    |
| -0.021446252 | 0.738373039 | -0.352677726 | 1.38E-08 | 0.188923768  | 0.002989819 |
| 0.386963893  | 3.56E-10    | 0.77507535   | 2.35E-50 | -0.368749505 | 2.63E-09    |
| -0.189457722 | 0.002907723 | -0.675275295 | 5.66E-34 | 0.34986896   | 1.83E-08    |
| 0.266446083  | 2.38E-05    | 0.698951284  | 3.05E-37 | -0.326915636 | 1.65E-07    |
| 0.703706662  | 6.14E-38    | 0.68089941   | 1.01E-34 | -0.34981497  | 1.84E-08    |
| 0.608388451  | 3.39E-26    | 0.716118469  | 8.05E-40 | -0.212106539 | 0.000834439 |
| 0.559384168  | 1.43E-21    | 0.801310537  | 3.86E-56 | -0.158525437 | 0.012978617 |
| 0.814612689  | 2.05E-59    | 0.738791029  | 1.56E-43 | -0.245768916 | 0.000101489 |
| 0.252285948  | 6.51E-05    | 0.50230867   | 4.57E-17 | -0.125926972 | 0.048972264 |
| -0.10692039  | 0.094958938 | -0.569880544 | 1.69E-22 | 0.151592141  | 0.017577687 |
| 0.341679455  | 4.09E-08    | 0.589850049  | 2.36E-24 | -0.341770734 | 4.06E-08    |
| 0.390576251  | 2.36E-10    | 0.734835696  | 7.38E-43 | -0.225693119 | 0.000369951 |
| 0.550571131  | 8.07E-21    | 0.702257316  | 1.00E-37 | -0.199550382 | 0.001694584 |
| 0.417667965  | 9.21E-12    | 0.564373772  | 5.23E-22 | -0.077553446 | 0.226463918 |
| 0.578772481  | 2.61E-23    | 0.884604746  | 1.81E-82 | -0.311363703 | 6.60E-07    |
| 0.499512313  | 7.23E-17    | 0.794571602  | 1.42E-54 | -0.396672318 | 1.17E-10    |
| -0.343095913 | 3.57E-08    | -0.717968552 | 4.13E-40 | 0.492375511  | 2.29E-16    |
| 0.281950478  | 7.40E-06    | 0.731308635  | 2.88E-42 | -0.279857538 | 8.70E-06    |
| -0.251613276 | 6.82E-05    | -0.602435062 | 1.36E-25 | 0.471504087  | 5.78E-15    |
| 0.743619172  | 2.25E-44    | 0.723575692  | 5.31E-41 | -0.112069616 | 0.079994968 |
| 0.475592966  | 3.12E-15    | 0.722103423  | 9.15E-41 | -0.154869946 | 0.015251213 |
| -0.356807673 | 9.10E-09    | -0.577694582 | 3.29E-23 | 0.150367196  | 0.018523326 |
| 0.511610937  | 9.59E-18    | 0.717821711  | 4.36E-40 | -0.163769506 | 0.010239112 |
| 0.448242646  | 1.64E-13    | 0.679044748  | 1.79E-34 | -0.138928637 | 0.029704405 |
| -0.217205488 | 0.00061848  | -0.413873583 | 1.48E-11 | 0.771568605  | 1.21E-49    |
| -0.248566021 | 8.40E-05    | -0.33440812  | 8.20E-08 | 0.461320427  | 2.58E-14    |
| 0.634592647  | 5.13E-29    | 0.786080363  | 1.11E-52 | -0.334272911 | 8.30E-08    |
| -0.356834896 | 9.08E-09    | -0.547941562 | 1.34E-20 | 0.463446166  | 1.90E-14    |
| -0.299269068 | 1.84E-06    | -0.366049939 | 3.49E-09 | 0.408530471  | 2.84E-11    |
| 0.530074955  | 3.75E-19    | 0.903376123  | 2.53E-91 | -0.373893926 | 1.51E-09    |
| 0.620199176  | 1.96E-27    | 0.832756544  | 2.46E-64 | -0.302209406 | 1.44E-06    |
| 0.108146126  | 0.091208883 | 0.542752087  | 3.60E-20 | -0.196243613 | 0.002028328 |
| 0.738368417  | 1.84E-43    | 0.845355871  | 4.11E-68 | -0.239876991 | 0.000150063 |
| -0.416770803 | 1.03E-11    | -0.696699679 | 6.43E-37 | 0.296461906  | 2.32E-06    |
| -0.181487322 | 0.004373254 | -0.408503378 | 2.85E-11 | 0.254934153  | 5.42E-05    |
| -0.568713737 | 2.15E-22    | -0.702269224 | 1.00E-37 | 0.287699357  | 4.71E-06    |
| 0.689224084  | 7.32E-36    | 0.785759844  | 1.30E-52 | -0.258343977 | 4.26E-05    |
| -0.323400717 | 2.27E-07    | -0.510838419 | 1.09E-17 | 0.285712341  | 5.51E-06    |
| 0.552718968  | 5.32E-21    | 0.673369921  | 1.01E-33 | -0.121227421 | 0.058118995 |

|              |             |              |          |              |             |
|--------------|-------------|--------------|----------|--------------|-------------|
| -0.240323224 | 0.000145733 | -0.528129431 | 5.33E-19 | 0.541684468  | 4.40E-20    |
| 0.653870179  | 2.86E-31    | 0.556849245  | 2.36E-21 | -0.084418669 | 0.187853482 |
| 0.523879916  | 1.14E-18    | 0.503567898  | 3.71E-17 | -0.153344313 | 0.016298235 |
| -0.370242029 | 2.24E-09    | -0.622308135 | 1.16E-27 | 0.267222308  | 2.25E-05    |
| -0.283373236 | 6.62E-06    | -0.661739277 | 3.08E-32 | 0.586814941  | 4.60E-24    |
| 0.495679796  | 1.35E-16    | 0.640750872  | 1.02E-29 | -0.465590053 | 1.39E-14    |
| 0.563905298  | 5.75E-22    | 0.721509365  | 1.14E-40 | -0.199470698 | 0.001701997 |
| 0.3056442    | 1.08E-06    | 0.772070824  | 9.62E-50 | -0.37466958  | 1.39E-09    |
| 0.302991711  | 1.35E-06    | 0.561302456  | 9.72E-22 | -0.453417689 | 7.96E-14    |
| 0.654878773  | 2.16E-31    | 0.866078492  | 3.99E-75 | -0.401720499 | 6.44E-11    |
| 0.560397639  | 1.16E-21    | 0.80184577   | 2.88E-56 | -0.179372371 | 0.004860457 |
| 0.369556083  | 2.41E-09    | 0.611047528  | 1.80E-26 | -0.319705472 | 3.16E-07    |
| 0.615054256  | 6.88E-27    | 0.820804147  | 4.95E-61 | -0.282963042 | 6.84E-06    |
| 0.804832969  | 5.54E-57    | 0.777842563  | 6.28E-51 | -0.27437663  | 1.32E-05    |
| -0.44906434  | 1.46E-13    | -0.580790207 | 1.70E-23 | 0.4689324    | 8.47E-15    |
| -0.022112548 | 0.73055437  | -0.389739136 | 2.60E-10 | 0.337313352  | 6.22E-08    |
| 0.562679075  | 7.36E-22    | 0.66029647   | 4.65E-32 | -0.478923841 | 1.88E-15    |
| 0.460840647  | 2.76E-14    | 0.87108118   | 5.38E-77 | -0.331951685 | 1.03E-07    |
| 0.676756352  | 3.61E-34    | 0.820421094  | 6.26E-61 | -0.395477225 | 1.34E-10    |
| -0.379635408 | 8.08E-10    | -0.741444799 | 5.41E-44 | 0.402956938  | 5.56E-11    |
| -0.163186759 | 0.010515912 | -0.343891479 | 3.30E-08 | 0.690038188  | 5.64E-36    |
| -0.191378619 | 0.002629015 | -0.403794642 | 5.03E-11 | 0.563506957  | 6.23E-22    |
| -0.176266541 | 0.005664543 | -0.597891873 | 3.87E-25 | 0.491484734  | 2.64E-16    |
| 0.897165047  | 3.31E-88    | 0.844656673  | 6.79E-68 | -0.261742095 | 3.35E-05    |
| -0.340283113 | 4.68E-08    | -0.641989255 | 7.32E-30 | 0.087318063  | 0.17308501  |
| -0.251962708 | 6.66E-05    | -0.42378142  | 4.25E-12 | 0.083796007  | 0.191142239 |
| 0.505514304  | 2.68E-17    | 0.696083798  | 7.88E-37 | -0.187615623 | 0.003199901 |
| 0.641723204  | 7.86E-30    | 0.656012735  | 1.57E-31 | -0.292222385 | 3.28E-06    |
| -0.297779081 | 2.08E-06    | -0.4977879   | 9.58E-17 | 0.357972495  | 8.08E-09    |
| 0.183626691  | 0.003925624 | 0.631258064  | 1.21E-28 | -0.282231012 | 7.24E-06    |
| -0.402110891 | 6.15E-11    | -0.633685075 | 6.49E-29 | 0.454280698  | 7.05E-14    |
| 0.52148401   | 1.74E-18    | 0.861168896  | 2.31E-73 | -0.309710005 | 7.61E-07    |
| 0.463717078  | 1.82E-14    | 0.60291876   | 1.22E-25 | -0.405664751 | 4.02E-11    |
| 0.02438021   | 0.704156592 | 0.387295729  | 3.43E-10 | -0.204071037 | 0.001319305 |
| 0.637699625  | 2.28E-29    | 0.91341227   | 7.73E-97 | -0.34035355  | 4.65E-08    |
| 0.749809757  | 1.76E-45    | 0.695573255  | 9.32E-37 | -0.19663305  | 0.001986125 |
| 0.623868258  | 7.88E-28    | 0.74856691   | 2.95E-45 | -0.307017885 | 9.59E-07    |
| 0.715727479  | 9.26E-40    | 0.783270771  | 4.47E-52 | -0.246556341 | 9.62E-05    |
| 0.823487447  | 9.44E-62    | 0.756830579  | 8.93E-47 | -0.208534526 | 0.001025038 |
| -0.331655637 | 1.06E-07    | -0.620716454 | 1.72E-27 | 0.509322541  | 1.41E-17    |

|              |             |              |          |              |             |
|--------------|-------------|--------------|----------|--------------|-------------|
| -0.202199603 | 0.001464301 | -0.541253881 | 4.77E-20 | 0.567608551  | 2.70E-22    |
| 0.345102053  | 2.93E-08    | 0.387429085  | 3.38E-10 | 0.020822324  | 0.745719008 |
| 0.567825726  | 2.58E-22    | 0.790536068  | 1.15E-53 | -0.331372622 | 1.09E-07    |
| 0.352696246  | 1.38E-08    | 0.531949289  | 2.67E-19 | -0.242888092 | 0.000123025 |
| 0.753427748  | 3.84E-46    | 0.781239497  | 1.21E-51 | -0.270955363 | 1.71E-05    |
| 0.636792694  | 2.89E-29    | 0.739160228  | 1.35E-43 | -0.291277534 | 3.54E-06    |
| 0.817147703  | 4.54E-60    | 0.693273541  | 1.98E-36 | -0.368533525 | 2.69E-09    |
| 0.565601641  | 4.07E-22    | 0.48149159   | 1.27E-15 | -0.147420541 | 0.020981227 |
| 0.528730987  | 4.78E-19    | 0.772339512  | 8.48E-50 | -0.401566265 | 6.56E-11    |
| -0.28708069  | 4.95E-06    | -0.586132944 | 5.34E-24 | 0.438041473  | 6.58E-13    |
| 0.615654913  | 5.95E-27    | 0.690048201  | 5.62E-36 | -0.134413843 | 0.035491903 |
| 0.219580619  | 0.000536679 | 0.338828583  | 5.39E-08 | -0.277087418 | 1.08E-05    |
| -0.317759998 | 3.76E-07    | -0.527897197 | 5.55E-19 | 0.544130136  | 2.77E-20    |
| -0.548761069 | 1.14E-20    | -0.59076919  | 1.92E-24 | 0.340739419  | 4.48E-08    |
| 0.744810002  | 1.39E-44    | 0.67864685   | 2.02E-34 | -0.167158303 | 0.008753576 |
| -0.182884458 | 0.00407601  | -0.442370785 | 3.67E-13 | 0.400309639  | 7.62E-11    |
| -0.214695502 | 0.000717342 | -0.589420896 | 2.59E-24 | 0.381147458  | 6.83E-10    |
| 0.720354922  | 1.74E-40    | 0.79627141   | 5.79E-55 | -0.229925224 | 0.00028426  |
| -0.278329503 | 9.78E-06    | -0.558721533 | 1.63E-21 | 0.318942085  | 3.39E-07    |
| 0.621783462  | 1.32E-27    | 0.593103013  | 1.14E-24 | -0.251868949 | 6.70E-05    |
| 0.76522092   | 2.21E-48    | 0.899468236  | 2.44E-89 | -0.237056184 | 0.000180349 |
| -0.358418405 | 7.72E-09    | -0.698362356 | 3.71E-37 | 0.338675452  | 5.46E-08    |
| 0.825567411  | 2.56E-62    | 0.810148719  | 2.75E-58 | -0.373341519 | 1.61E-09    |
| -0.036551836 | 0.569090714 | -0.353103026 | 1.33E-08 | 0.485568687  | 6.73E-16    |
| -0.395452964 | 1.35E-10    | -0.667780348 | 5.31E-33 | 0.529320759  | 4.30E-19    |
| -0.295214315 | 2.57E-06    | -0.51237415  | 8.42E-18 | 0.327587318  | 1.55E-07    |
| 0.780098727  | 2.11E-51    | 0.872994154  | 9.88E-78 | -0.382699937 | 5.75E-10    |
| 0.264318673  | 2.78E-05    | 0.638741003  | 1.73E-29 | -0.414871448 | 1.31E-11    |
| 0.485915974  | 6.38E-16    | 0.55409468   | 4.06E-21 | -0.424611926 | 3.82E-12    |
| -0.35832835  | 7.79E-09    | -0.692571957 | 2.49E-36 | 0.456315357  | 5.29E-14    |
| -0.398085964 | 9.90E-11    | -0.571895993 | 1.11E-22 | 0.179921962  | 0.00472937  |
| -0.476543994 | 2.70E-15    | -0.677012007 | 3.34E-34 | 0.232094616  | 0.000247879 |
| 0.752889889  | 4.82E-46    | 0.703763044  | 6.02E-38 | -0.234190364 | 0.000216897 |
| 0.170172161  | 0.007596599 | 0.525492246  | 8.54E-19 | -0.21046133  | 0.000917755 |
| 0.680457884  | 1.16E-34    | 0.701289381  | 1.39E-37 | -0.233837285 | 0.00022185  |
| 0.382940809  | 5.60E-10    | 0.665805553  | 9.47E-33 | -0.344630733 | 3.07E-08    |
| -0.354315888 | 1.17E-08    | -0.56906824  | 2.00E-22 | 0.416637306  | 1.05E-11    |
| -0.269205558 | 1.94E-05    | -0.379768696 | 7.96E-10 | 0.360613277  | 6.16E-09    |
| 0.494806507  | 1.55E-16    | 0.721738644  | 1.05E-40 | -0.336994724 | 6.42E-08    |
| -0.385681268 | 4.12E-10    | -0.356676923 | 9.23E-09 | 0.445245785  | 2.48E-13    |

|              |             |              |          |              |             |
|--------------|-------------|--------------|----------|--------------|-------------|
| -0.442376221 | 3.67E-13    | -0.483951982 | 8.66E-16 | 0.321158885  | 2.78E-07    |
| -0.544853167 | 2.42E-20    | -0.861305323 | 2.07E-73 | 0.446510729  | 2.08E-13    |
| -0.223281675 | 0.000428949 | -0.471099962 | 6.14E-15 | 0.292834395  | 3.12E-06    |
| -0.455320799 | 6.09E-14    | -0.608672275 | 3.17E-26 | 0.450357179  | 1.22E-13    |
| -0.468857448 | 8.57E-15    | -0.810899205 | 1.78E-58 | 0.356593086  | 9.31E-09    |
| -0.140817145 | 0.027534344 | -0.358832139 | 7.40E-09 | 0.36354477   | 4.54E-09    |
| 0.546652311  | 1.72E-20    | 0.49633451   | 1.21E-16 | -0.297312211 | 2.16E-06    |
| 0.336776681  | 6.55E-08    | 0.410081104  | 2.35E-11 | -0.176427497 | 0.00562011  |
| 0.288954363  | 4.26E-06    | 0.721791782  | 1.03E-40 | -0.487669263 | 4.84E-16    |
| 0.386887432  | 3.60E-10    | 0.62964276   | 1.83E-28 | -0.318281212 | 3.59E-07    |
| -0.334183436 | 8.37E-08    | -0.685618002 | 2.31E-35 | 0.510263853  | 1.21E-17    |
| 0.70604334   | 2.76E-38    | 0.736269753  | 4.21E-43 | -0.339323479 | 5.14E-08    |
| -0.350649442 | 1.69E-08    | -0.678081347 | 2.41E-34 | 0.446449927  | 2.10E-13    |
| -0.115416278 | 0.071334394 | -0.576904515 | 3.89E-23 | 0.361423617  | 5.66E-09    |
| 0.463239314  | 1.95E-14    | 0.718914172  | 2.94E-40 | -0.286038141 | 5.37E-06    |
| 0.616444868  | 4.91E-27    | 0.898371855  | 8.52E-89 | -0.407844999 | 3.09E-11    |
| 0.226331917  | 0.000355637 | 0.63160569   | 1.11E-28 | -0.226574764 | 0.000350332 |
| 0.735399324  | 5.92E-43    | 0.881465468  | 3.86E-81 | -0.375405685 | 1.28E-09    |
| 0.540362893  | 5.64E-20    | 0.905663046  | 1.59E-92 | -0.45357054  | 7.80E-14    |
| 0.631737114  | 1.07E-28    | 0.797535344  | 2.96E-55 | -0.226551471 | 0.000350837 |
| 0.777811453  | 6.37E-51    | 0.878161694  | 8.83E-80 | -0.382868364 | 5.64E-10    |
| 0.726217528  | 1.99E-41    | 0.882702737  | 1.17E-81 | -0.401268449 | 6.80E-11    |
| 0.640281339  | 1.15E-29    | 0.808734391  | 6.16E-58 | -0.403248705 | 5.37E-11    |
| -0.269733932 | 1.87E-05    | -0.532712451 | 2.32E-19 | 0.310503078  | 7.11E-07    |
| -0.167171686 | 0.008748111 | -0.47733069  | 2.40E-15 | 0.387457986  | 3.37E-10    |
| 0.267884213  | 2.14E-05    | 0.437782242  | 6.81E-13 | -0.175527883 | 0.005872523 |
| -0.137770169 | 0.031106633 | -0.322888397 | 2.38E-07 | 0.510424439  | 1.17E-17    |
| -0.238196313 | 0.000167478 | -0.463702895 | 1.83E-14 | 0.48944638   | 3.66E-16    |
| -0.288312908 | 4.49E-06    | -0.353741027 | 1.24E-08 | 0.341697005  | 4.09E-08    |
| -0.325504868 | 1.87E-07    | -0.723627497 | 5.21E-41 | 0.369373164  | 2.46E-09    |
| -0.153294112 | 0.016333729 | -0.42012868  | 6.76E-12 | 0.511051834  | 1.05E-17    |
| -0.405009166 | 4.35E-11    | -0.307337221 | 9.33E-07 | 0.124930019  | 0.050805117 |
| 0.530258259  | 3.63E-19    | 0.754942261  | 2.01E-46 | -0.368577694 | 2.67E-09    |
| -0.574033537 | 7.12E-23    | -0.558366061 | 1.75E-21 | 0.112174266  | 0.079711844 |
| -0.189559091 | 0.002892371 | -0.39168656  | 2.08E-10 | 0.68051121   | 1.14E-34    |
| -0.368938929 | 2.57E-09    | -0.679755007 | 1.44E-34 | 0.507989849  | 1.77E-17    |
| 0.501849272  | 4.93E-17    | 0.820934456  | 4.57E-61 | -0.356111972 | 9.77E-09    |
| -0.177269767 | 0.005392649 | -0.344446985 | 3.13E-08 | 0.393764314  | 1.64E-10    |
| -0.443498201 | 3.15E-13    | -0.700507834 | 1.81E-37 | 0.400858311  | 7.14E-11    |
| -0.457994929 | 4.16E-14    | -0.674297915 | 7.61E-34 | 0.480357014  | 1.51E-15    |



|              |             |              |           |              |             |
|--------------|-------------|--------------|-----------|--------------|-------------|
| -0.363627886 | 4.50E-09    | -0.60137554  | 1.74E-25  | 0.473443413  | 4.32E-15    |
| 0.267470403  | 2.21E-05    | 0.624832275  | 6.19E-28  | -0.325479157 | 1.88E-07    |
| 0.650824804  | 6.66E-31    | 0.706833459  | 2.10E-38  | -0.271374456 | 1.65E-05    |
| 0.135116951  | 0.034532189 | 0.582562102  | 1.16E-23  | -0.430484824 | 1.79E-12    |
| 0.737894292  | 2.22E-43    | 0.906569958  | 5.20E-93  | -0.291412998 | 3.50E-06    |
| 0.396498112  | 1.19E-10    | 0.675100314  | 5.97E-34  | -0.135317389 | 0.03426267  |
| 0.714070704  | 1.67E-39    | 0.592912122  | 1.19E-24  | -0.093767487 | 0.143354254 |
| 0.705655942  | 3.16E-38    | 0.828565391  | 3.79E-63  | -0.387492804 | 3.36E-10    |
| 0.458163937  | 4.06E-14    | 0.600645569  | 2.06E-25  | -0.148432652 | 0.020106897 |
| -0.342115049 | 3.92E-08    | -0.523327196 | 1.25E-18  | 0.525645751  | 8.31E-19    |
| -0.30006788  | 1.72E-06    | -0.573571235 | 7.85E-23  | 0.208945923  | 0.001001207 |
| 0.436574962  | 8.01E-13    | 0.60203362   | 1.50E-25  | -0.152447583 | 0.016942499 |
| 0.499876199  | 6.81E-17    | 0.706668945  | 2.23E-38  | -0.295128605 | 2.59E-06    |
| -0.359426202 | 6.96E-09    | -0.573968341 | 7.22E-23  | 0.545981381  | 1.95E-20    |
| 0.692247709  | 2.76E-36    | 0.854978994  | 3.11E-71  | -0.238918151 | 0.000159779 |
| 0.780514731  | 1.73E-51    | 0.709083025  | 9.66E-39  | -0.454840235 | 6.52E-14    |
| 0.345199791  | 2.91E-08    | 0.582661734  | 1.13E-23  | -0.16551646  | 0.009447558 |
| -0.244861105 | 0.000107861 | -0.651771149 | 5.13E-31  | 0.477485284  | 2.34E-15    |
| 0.29157515   | 3.45E-06    | 0.587905684  | 3.62E-24  | -0.221602799 | 0.000475056 |
| 0.746660467  | 6.49E-45    | 0.947413429  | 3.07E-122 | -0.414509662 | 1.37E-11    |
| 0.641927533  | 7.44E-30    | 0.811792879  | 1.06E-58  | -0.382439842 | 5.92E-10    |
| 0.437478652  | 7.10E-13    | 0.653950956  | 2.80E-31  | -0.237715155 | 0.000172802 |
| 0.384605642  | 4.65E-10    | 0.588535781  | 3.15E-24  | -0.264230955 | 2.80E-05    |
| 0.369533339  | 2.42E-09    | 0.374031006  | 1.49E-09  | -0.445587593 | 2.37E-13    |
| 0.412344441  | 1.78E-11    | 0.574156772  | 6.94E-23  | -0.207748099 | 0.001072051 |
| 0.609928402  | 2.35E-26    | 0.797425892  | 3.13E-55  | -0.217337851 | 0.000613634 |
| -0.338225655 | 5.71E-08    | -0.563483999 | 6.26E-22  | 0.647631738  | 1.60E-30    |
| 0.161245116  | 0.011486507 | 0.327197069  | 1.60E-07  | -0.239855582 | 0.000150274 |
| 0.46590931   | 1.32E-14    | 0.652756047  | 3.90E-31  | -0.161148967 | 0.01153656  |
| 0.419170367  | 7.63E-12    | 0.710041668  | 6.91E-39  | -0.426477052 | 3.01E-12    |
| -0.57455434  | 6.38E-23    | -0.604822136 | 7.83E-26  | 0.178300859  | 0.005125461 |
| -0.350894624 | 1.65E-08    | -0.513300865 | 7.19E-18  | 0.284468379  | 6.08E-06    |
| 0.194680798  | 0.002206039 | 0.402336815  | 5.99E-11  | -0.191307883 | 0.002638832 |
| 0.701959679  | 1.11E-37    | 0.510548228  | 1.15E-17  | -0.192477091 | 0.002480765 |
| 0.731654368  | 2.53E-42    | 0.744173783  | 1.80E-44  | -0.315940741 | 4.42E-07    |
| 0.420351175  | 6.57E-12    | 0.747148413  | 5.31E-45  | -0.338108441 | 5.77E-08    |
| 0.705295874  | 3.57E-38    | 0.83250099   | 2.92E-64  | -0.355125465 | 1.08E-08    |
| -0.56773789  | 2.63E-22    | -0.715519888 | 9.97E-40  | 0.064660684  | 0.313464503 |
| 0.479275405  | 1.78E-15    | 0.615859481  | 5.66E-27  | -0.210379261 | 0.000922105 |
| 0.761375335  | 1.23E-47    | 0.627801386  | 2.93E-28  | -0.068785335 | 0.283529005 |

|              |             |              |           |              |             |
|--------------|-------------|--------------|-----------|--------------|-------------|
| -0.377120512 | 1.06E-09    | -0.743837573 | 2.06E-44  | 0.472245652  | 5.17E-15    |
| -0.366901927 | 3.19E-09    | -0.59642592  | 5.40E-25  | 0.492868436  | 2.12E-16    |
| -0.142050121 | 0.026192092 | -0.431890984 | 1.49E-12  | 0.171229794  | 0.007224124 |
| 0.603912994  | 9.68E-26    | 0.539146752  | 7.08E-20  | -0.233297001 | 0.000229634 |
| -0.287423877 | 4.81E-06    | -0.336581257 | 6.67E-08  | 0.301589788  | 1.52E-06    |
| -0.297246296 | 2.18E-06    | -0.512470478 | 8.28E-18  | 0.345660825  | 2.78E-08    |
| 0.494968638  | 1.51E-16    | 0.498610766  | 8.38E-17  | -0.294772233 | 2.67E-06    |
| 0.454227895  | 7.11E-14    | 0.606407832  | 5.40E-26  | -0.256431322 | 4.88E-05    |
| -0.111656501 | 0.081120564 | -0.435179671 | 9.64E-13  | 0.321145455  | 2.78E-07    |
| 0.545682549  | 2.07E-20    | 0.438729427  | 6.00E-13  | -0.215354778 | 0.00069005  |
| -0.058176874 | 0.364553075 | -0.394367445 | 1.53E-10  | 0.570353382  | 1.53E-22    |
| -0.357297153 | 8.66E-09    | -0.601929211 | 1.53E-25  | 0.544219671  | 2.73E-20    |
| 0.287659596  | 4.72E-06    | 0.367172547  | 3.10E-09  | -0.196828936 | 0.001965202 |
| 0.578590114  | 2.72E-23    | 0.850571235  | 8.91E-70  | -0.379475307 | 8.22E-10    |
| -0.309569812 | 7.70E-07    | -0.593866682 | 9.62E-25  | 0.083442467  | 0.193028201 |
| -0.131751416 | 0.039333504 | -0.353946888 | 1.22E-08  | 0.52663953   | 6.96E-19    |
| 0.409835364  | 2.43E-11    | 0.648544898  | 1.25E-30  | -0.257574409 | 4.50E-05    |
| -0.23589352  | 0.000194422 | -0.553776798 | 4.32E-21  | 0.473183232  | 4.49E-15    |
| 0.036020466  | 0.574723743 | -0.344721124 | 3.04E-08  | 0.18785803   | 0.003159991 |
| -0.248119778 | 8.66E-05    | -0.618793227 | 2.77E-27  | 0.476426306  | 2.75E-15    |
| -0.387394362 | 3.39E-10    | -0.64680283  | 2.00E-30  | 0.534539499  | 1.66E-19    |
| -0.41465231  | 1.34E-11    | -0.482640977 | 1.06E-15  | -0.134836619 | 0.034912157 |
| 0.47553327   | 3.15E-15    | 0.81029968   | 2.52E-58  | -0.281459447 | 7.68E-06    |
| 0.722030008  | 9.40E-41    | 0.742601623  | 3.39E-44  | -0.364534446 | 4.10E-09    |
| -0.10661336  | 0.095917246 | -0.437219006 | 7.35E-13  | 0.438081484  | 6.55E-13    |
| -0.1199376   | 0.060862694 | -0.334039101 | 8.49E-08  | 0.410132374  | 2.34E-11    |
| -0.436950371 | 7.61E-13    | -0.653342576 | 3.31E-31  | 0.548774229  | 1.14E-20    |
| 0.536681147  | 1.12E-19    | 0.808326208  | 7.77E-58  | -0.240743281 | 0.000141763 |
| -0.360767154 | 6.06E-09    | -0.602658945 | 1.29E-25  | 0.533846609  | 1.89E-19    |
| -0.078156185 | 0.222864312 | -0.371997029 | 1.86E-09  | 0.217790207  | 0.000597336 |
| 0.617312326  | 3.98E-27    | 0.842438598  | 3.29E-67  | -0.223091722 | 0.000433949 |
| 0.580870619  | 1.67E-23    | 0.66028555   | 4.67E-32  | -0.263245032 | 3.00E-05    |
| 0.329663859  | 1.28E-07    | 0.741966291  | 4.38E-44  | -0.213767904 | 0.000757431 |
| 0.529085022  | 4.48E-19    | 0.766451647  | 1.27E-48  | -0.326425482 | 1.72E-07    |
| -0.422481908 | 5.02E-12    | -0.61355983  | 9.87E-27  | 0.317618943  | 3.81E-07    |
| 0.115960595  | 0.070000831 | 0.604230861  | 8.99E-26  | -0.45054731  | 1.19E-13    |
| 0.392434937  | 1.91E-10    | 0.458778102  | 3.72E-14  | -0.479749818 | 1.66E-15    |
| 0.621644462  | 1.37E-27    | 0.718300899  | 3.67E-40  | -0.354732978 | 1.12E-08    |
| 0.690352897  | 5.10E-36    | 0.959047888  | 4.00E-135 | -0.408638662 | 2.81E-11    |
| 0.583690474  | 9.08E-24    | 0.48312983   | 9.84E-16  | -0.144310932 | 0.023876557 |

|              |             |              |          |              |             |
|--------------|-------------|--------------|----------|--------------|-------------|
| 0.250428102  | 7.40E-05    | 0.53269376   | 2.33E-19 | -0.24617398  | 9.88E-05    |
| 0.376031727  | 1.20E-09    | 0.529441864  | 4.20E-19 | -0.239950588 | 0.000149341 |
| 0.848314247  | 4.76E-69    | 0.801984513  | 2.67E-56 | -0.30401637  | 1.24E-06    |
| -0.160018912 | 0.012139415 | -0.407979069 | 3.04E-11 | 0.203958349  | 0.001327649 |
| 0.568044172  | 2.47E-22    | 0.528944377  | 4.60E-19 | -0.262227001 | 3.23E-05    |
| -0.156595359 | 0.014138434 | -0.358368858 | 7.76E-09 | 0.318878272  | 3.41E-07    |
| 0.274807579  | 1.28E-05    | 0.549143881  | 1.06E-20 | -0.105341193 | 0.099970198 |
| -0.247462228 | 9.05E-05    | -0.596625265 | 5.16E-25 | 0.478997754  | 1.86E-15    |
| -0.480035635 | 1.59E-15    | -0.643698945 | 4.63E-30 | 0.469313274  | 8.01E-15    |
| 0.653231059  | 3.42E-31    | 0.723819353  | 4.86E-41 | -0.494116834 | 1.74E-16    |
| 0.555464098  | 3.10E-21    | 0.528227168  | 5.23E-19 | -0.057375662 | 0.371206725 |
| -0.509851678 | 1.29E-17    | -0.483333629 | 9.54E-16 | 0.184731188  | 0.0037111   |
| -0.290843322 | 3.66E-06    | -0.568261875 | 2.36E-22 | 0.430651822  | 1.75E-12    |
| -0.360142815 | 6.47E-09    | -0.579942761 | 2.04E-23 | 0.586139206  | 5.33E-24    |
| -0.154246648 | 0.015671644 | -0.381009613 | 6.94E-10 | 0.369265581  | 2.49E-09    |
| -0.407001803 | 3.42E-11    | -0.609369132 | 2.69E-26 | 0.482830793  | 1.03E-15    |
| 0.629739528  | 1.79E-28    | 0.699012323  | 2.98E-37 | -0.317375719 | 3.89E-07    |
| 0.327630364  | 1.54E-07    | 0.537762831  | 9.16E-20 | -0.142553336 | 0.025660649 |
| -0.166033136 | 0.009224084 | -0.389461267 | 2.68E-10 | 0.467442685  | 1.06E-14    |
| -0.314652079 | 4.95E-07    | -0.395622746 | 1.32E-10 | 0.580273937  | 1.90E-23    |
| -0.216763432 | 0.000634922 | -0.62459337  | 6.57E-28 | 0.413399392  | 1.57E-11    |
| 0.399591485  | 8.29E-11    | 0.611826348  | 1.50E-26 | -0.191976447 | 0.002547363 |
| -0.246033779 | 9.97E-05    | -0.576493357 | 4.24E-23 | 0.688137856  | 1.04E-35    |
| -0.370387831 | 2.20E-09    | -0.645668292 | 2.72E-30 | 0.482951498  | 1.01E-15    |
| -0.370369948 | 2.21E-09    | -0.634051485 | 5.91E-29 | 0.521291638  | 1.80E-18    |
| -0.419992492 | 6.88E-12    | -0.580027912 | 2.00E-23 | -0.055019044 | 0.391207407 |
| 0.28148987   | 7.67E-06    | 0.488360379  | 4.34E-16 | -0.354747688 | 1.12E-08    |
| -0.450181027 | 1.25E-13    | -0.596884255 | 4.87E-25 | 0.33531967   | 7.52E-08    |
| -0.227580168 | 0.000329141 | -0.451288109 | 1.07E-13 | 0.496030273  | 1.27E-16    |
| 0.728891177  | 7.25E-42    | 0.729057942  | 6.80E-42 | -0.204213147 | 0.001308852 |
| -0.101100607 | 0.114467127 | -0.527555307 | 5.90E-19 | 0.452948413  | 8.51E-14    |
| -0.268198858 | 2.09E-05    | -0.370979286 | 2.07E-09 | 0.699678949  | 2.39E-37    |
| -0.375862932 | 1.22E-09    | -0.664509415 | 1.38E-32 | 0.595927399  | 6.04E-25    |
| -0.207229677 | 0.001104118 | -0.604918232 | 7.66E-26 | 0.520704082  | 1.99E-18    |
| 0.629822052  | 1.75E-28    | 0.726111207  | 2.07E-41 | -0.319263993 | 3.29E-07    |
| 0.557130476  | 2.23E-21    | 0.578211133  | 2.95E-23 | -0.159198806 | 0.012594128 |
| 0.420132883  | 6.76E-12    | 0.679439887  | 1.58E-34 | -0.292320334 | 3.25E-06    |
| 0.722340937  | 8.38E-41    | 0.806380238  | 2.33E-57 | -0.286575783 | 5.15E-06    |
| -0.108624939 | 0.089776519 | -0.590087524 | 2.23E-24 | 0.526976024  | 6.55E-19    |
| -0.443150133 | 3.30E-13    | -0.550960408 | 7.48E-21 | 0.178945087  | 0.004964618 |

|              |             |              |          |              |             |
|--------------|-------------|--------------|----------|--------------|-------------|
| 0.626665643  | 3.90E-28    | 0.80380103   | 9.82E-57 | -0.284413872 | 6.10E-06    |
| 0.006513821  | 0.919203505 | -0.461264143 | 2.60E-14 | 0.144041859  | 0.024142553 |
| 0.460718116  | 2.81E-14    | 0.775707596  | 1.74E-50 | -0.21059109  | 0.000910915 |
| -0.371218571 | 2.02E-09    | -0.649445191 | 9.73E-31 | 0.397885075  | 1.01E-10    |
| 0.510444157  | 1.17E-17    | 0.837179005  | 1.27E-65 | -0.30307905  | 1.34E-06    |
| 0.647414488  | 1.70E-30    | 0.842834383  | 2.49E-67 | -0.250578277 | 7.32E-05    |
| -0.325072969 | 1.95E-07    | -0.546259073 | 1.85E-20 | 0.470025535  | 7.20E-15    |
| -0.250608203 | 7.31E-05    | -0.512956734 | 7.62E-18 | 0.221714309  | 0.000471856 |
| 0.525554633  | 8.45E-19    | 0.908289099  | 6.06E-94 | -0.307496287 | 9.21E-07    |
| -0.575555739 | 5.17E-23    | -0.706784151 | 2.14E-38 | 0.50479104   | 3.02E-17    |
| -0.368334564 | 2.74E-09    | -0.549897626 | 9.19E-21 | 0.57899411   | 2.49E-23    |
| -0.170695494 | 0.007410206 | -0.396770696 | 1.15E-10 | 0.389444598  | 2.69E-10    |
| -0.483652911 | 9.07E-16    | -0.803133108 | 1.42E-56 | 0.641288677  | 8.82E-30    |
| 0.361700078  | 5.50E-09    | 0.474436654  | 3.72E-15 | -0.260776833 | 3.59E-05    |
| -0.426665327 | 2.94E-12    | -0.563566153 | 6.16E-22 | 0.49918252   | 7.63E-17    |
| -0.442736675 | 3.49E-13    | -0.820508033 | 5.94E-61 | 0.585324111  | 6.37E-24    |
| 0.568399321  | 2.30E-22    | 0.814125862  | 2.72E-59 | -0.180651143 | 0.004560358 |
| -0.409377359 | 2.57E-11    | -0.759156382 | 3.25E-47 | 0.483208016  | 9.72E-16    |
| -0.274154942 | 1.34E-05    | -0.66074143  | 4.10E-32 | 0.590900002  | 1.87E-24    |
| -0.270643514 | 1.75E-05    | -0.439300035 | 5.56E-13 | 0.361257496  | 5.76E-09    |
| 0.45722637   | 4.64E-14    | 0.862163282  | 1.03E-73 | -0.326321061 | 1.74E-07    |
| -0.311232996 | 6.67E-07    | -0.607237305 | 4.45E-26 | 0.376748616  | 1.11E-09    |
| -0.508546479 | 1.61E-17    | -0.599069427 | 2.96E-25 | 0.487909974  | 4.66E-16    |
| 0.143267621  | 0.024922229 | 0.396612874  | 1.18E-10 | -0.478590994 | 1.98E-15    |
| 0.68554342   | 2.36E-35    | 0.849779252  | 1.61E-69 | -0.486392543 | 5.92E-16    |
| 0.622209628  | 1.19E-27    | 0.622853625  | 1.01E-27 | -0.331154074 | 1.11E-07    |
| 0.534708105  | 1.61E-19    | 0.748782166  | 2.70E-45 | -0.456435768 | 5.20E-14    |
| -0.213066075 | 0.000789125 | -0.379175957 | 8.50E-10 | 0.612491536  | 1.28E-26    |
| 0.459799658  | 3.21E-14    | 0.763093934  | 5.73E-48 | -0.325538057 | 1.87E-07    |
| -0.016354969 | 0.798952016 | -0.347003835 | 2.43E-08 | 0.561603542  | 9.15E-22    |
| 0.291939448  | 3.35E-06    | 0.752371032  | 6.00E-46 | -0.386851245 | 3.61E-10    |
| -0.178807163 | 0.004998667 | -0.612521447 | 1.27E-26 | 0.433752409  | 1.16E-12    |
| 0.675695934  | 4.98E-34    | 0.845938716  | 2.70E-68 | -0.414042035 | 1.45E-11    |
| -0.523886645 | 1.14E-18    | -0.49202538  | 2.43E-16 | 0.101076509  | 0.114553975 |
| 0.416199767  | 1.11E-11    | 0.725796023  | 2.33E-41 | -0.522940702 | 1.34E-18    |
| -0.4204997   | 6.45E-12    | -0.743969509 | 1.95E-44 | 0.414302761  | 1.40E-11    |
| 0.749086873  | 2.38E-45    | 0.688062292  | 1.06E-35 | -0.259189031 | 4.02E-05    |
| -0.361848844 | 5.42E-09    | -0.582898332 | 1.08E-23 | 0.510920267  | 1.08E-17    |
| -0.456568309 | 5.10E-14    | -0.391811716 | 2.05E-10 | 0.256334514  | 4.91E-05    |
| 0.779758344  | 2.49E-51    | 0.817418531  | 3.86E-60 | -0.379276152 | 8.41E-10    |

|              |             |              |          |              |             |
|--------------|-------------|--------------|----------|--------------|-------------|
| 0.558367317  | 1.75E-21    | 0.669190991  | 3.50E-33 | -0.300184459 | 1.71E-06    |
| 0.663048644  | 2.11E-32    | 0.661055672  | 3.75E-32 | -0.086779126 | 0.175762812 |
| 0.665415158  | 1.06E-32    | 0.838137934  | 6.57E-66 | -0.559100898 | 1.51E-21    |
| -0.404089113 | 4.86E-11    | -0.478562825 | 1.99E-15 | 0.236165466  | 0.000191041 |
| -0.33470729  | 7.97E-08    | -0.629597304 | 1.86E-28 | 0.430315782  | 1.83E-12    |
| -0.303967179 | 1.24E-06    | -0.320363475 | 2.98E-07 | 0.346722151  | 2.50E-08    |
| -0.227607255 | 0.000328587 | -0.472075502 | 5.30E-15 | 0.548036147  | 1.32E-20    |
| 0.621897954  | 1.29E-27    | 0.637940039  | 2.14E-29 | -0.071654634 | 0.263877443 |
| -0.33506504  | 7.70E-08    | -0.59008959  | 2.23E-24 | 0.459783652  | 3.22E-14    |
| 0.4666038    | 1.19E-14    | 0.718518744  | 3.39E-40 | -0.0693692   | 0.279452404 |
| 0.212421563  | 0.000819305 | 0.497479908  | 1.01E-16 | -0.347286201 | 2.37E-08    |
| 0.504422114  | 3.22E-17    | 0.705149859  | 3.75E-38 | -0.214770772 | 0.000714176 |
| -0.347305444 | 2.36E-08    | -0.764115139 | 3.63E-48 | 0.355913422  | 9.97E-09    |
| -0.220087683 | 0.000520568 | -0.315871984 | 4.45E-07 | 0.482194199  | 1.14E-15    |
| -0.521246502 | 1.81E-18    | -0.731817366 | 2.37E-42 | 0.352479745  | 1.41E-08    |
| -0.398192609 | 9.78E-11    | -0.613894795 | 9.11E-27 | 0.573963891  | 7.23E-23    |
| 0.244277984  | 0.000112149 | 0.619806001  | 2.16E-27 | -0.308811892 | 8.22E-07    |
| 0.662927427  | 2.19E-32    | 0.680614266  | 1.10E-34 | -0.207346943 | 0.001096788 |
| 0.530537147  | 3.45E-19    | 0.540730498  | 5.27E-20 | 0.004915103  | 0.938989057 |
| -0.153237809 | 0.016373618 | -0.446261593 | 2.16E-13 | 0.206297749  | 0.001163988 |
| -0.359422891 | 6.96E-09    | -0.396711331 | 1.16E-10 | 0.363769299  | 4.44E-09    |
| -0.495079741 | 1.49E-16    | -0.607375507 | 4.30E-26 | 0.293307351  | 3.00E-06    |
| -0.180395248 | 0.004619041 | -0.417875916 | 8.98E-12 | 0.619549623  | 2.30E-27    |
| 0.418250428  | 8.56E-12    | 0.715564051  | 9.82E-40 | -0.162231223 | 0.010984115 |
| -0.55256946  | 5.47E-21    | -0.49254133  | 2.23E-16 | 0.253150179  | 6.13E-05    |
| -0.442946245 | 3.39E-13    | -0.377900868 | 9.78E-10 | 0.258164056  | 4.32E-05    |
| -0.40567422  | 4.02E-11    | -0.646607931 | 2.11E-30 | 0.596418287  | 5.41E-25    |
| -0.21212908  | 0.000833348 | -0.371691999 | 1.92E-09 | 0.369257906  | 2.49E-09    |
| -0.307640875 | 9.09E-07    | -0.574028199 | 7.13E-23 | 0.068222707  | 0.287495019 |
| -0.421149236 | 5.94E-12    | -0.683887934 | 3.98E-35 | 0.093870518  | 0.142913097 |
| -0.331694385 | 1.06E-07    | -0.509942576 | 1.27E-17 | 0.175347583  | 0.005924316 |
| 0.71421073   | 1.59E-39    | 0.698420288  | 3.64E-37 | -0.328602965 | 1.41E-07    |
| 0.411593267  | 1.96E-11    | 0.775800351  | 1.66E-50 | -0.199528032 | 0.00169666  |
| 0.550021607  | 8.98E-21    | 0.800050012  | 7.65E-56 | -0.371925861 | 1.87E-09    |
| 0.588269293  | 3.34E-24    | 0.732377534  | 1.91E-42 | -0.292604624 | 3.18E-06    |
| -0.195433447 | 0.002118755 | -0.306022663 | 1.04E-06 | 0.347399911  | 2.34E-08    |
| -0.478451528 | 2.02E-15    | -0.793228632 | 2.86E-54 | 0.545951656  | 1.96E-20    |
| 0.830981878  | 7.91E-64    | 0.821900044  | 2.53E-61 | -0.183970582 | 0.003857661 |
| 0.431656198  | 1.53E-12    | 0.430726714  | 1.73E-12 | 0.094341288  | 0.140910518 |
| -0.450978421 | 1.12E-13    | -0.773627362 | 4.64E-50 | 0.516443287  | 4.18E-18    |

|              |             |              |          |              |             |
|--------------|-------------|--------------|----------|--------------|-------------|
| 0.637180679  | 2.61E-29    | 0.875915001  | 7.05E-79 | -0.213761349 | 0.000757721 |
| 0.222482048  | 0.000450365 | 0.46776435   | 1.01E-14 | -0.22712984  | 0.000338481 |
| 0.505750422  | 2.58E-17    | 0.800058358  | 7.61E-56 | -0.452293421 | 9.33E-14    |
| -0.421203679 | 5.90E-12    | -0.719172135 | 2.67E-40 | 0.562179721  | 8.14E-22    |
| 0.669354946  | 3.33E-33    | 0.753961395  | 3.06E-46 | -0.36040855  | 6.29E-09    |
| -0.137188142 | 0.031832183 | -0.445885314 | 2.27E-13 | 0.327735752  | 1.53E-07    |
| 0.580858367  | 1.67E-23    | 0.694361219  | 1.39E-36 | -0.259110753 | 4.04E-05    |
| -0.418695823 | 8.10E-12    | -0.533232638 | 2.11E-19 | 0.252426925  | 6.45E-05    |
| -0.303073699 | 1.34E-06    | -0.564120196 | 5.50E-22 | 0.249572886  | 7.84E-05    |
| -0.431325038 | 1.60E-12    | -0.679151928 | 1.73E-34 | 0.266802136  | 2.32E-05    |
| 0.756085745  | 1.23E-46    | 0.865127481  | 8.87E-75 | -0.331241413 | 1.10E-07    |
| -0.188350947 | 0.003080223 | -0.490371321 | 3.16E-16 | 0.243946919  | 0.000114655 |
| -0.210162963 | 0.000933661 | -0.460653521 | 2.84E-14 | 0.385312224  | 4.29E-10    |
| 0.09561879   | 0.135584263 | 0.470484625  | 6.73E-15 | -0.341262435 | 4.26E-08    |
| 0.603179407  | 1.15E-25    | 0.789054599  | 2.46E-53 | -0.312826689 | 5.81E-07    |
| 0.760164927  | 2.09E-47    | 0.897778694  | 1.66E-88 | -0.483422714 | 9.41E-16    |
| 0.503312169  | 3.87E-17    | 0.799158521  | 1.24E-55 | -0.290056573 | 3.90E-06    |
| 0.57256598   | 9.68E-23    | 0.582657474  | 1.14E-23 | -0.062428095 | 0.330500355 |
| 0.55996438   | 1.27E-21    | 0.902871324  | 4.61E-91 | -0.367991944 | 2.85E-09    |
| 0.322890022  | 2.38E-07    | 0.443506949  | 3.14E-13 | 0.033964891  | 0.596757922 |
| 0.467107649  | 1.11E-14    | 0.722067388  | 9.27E-41 | -0.273466809 | 1.41E-05    |
| 0.198520518  | 0.001792709 | 0.466374812  | 1.24E-14 | -0.138357226 | 0.030389149 |
| 0.57082899   | 1.39E-22    | 0.575670536  | 5.05E-23 | -0.199253093 | 0.001722393 |
| 0.512498112  | 8.25E-18    | 0.890320401  | 5.41E-85 | -0.325103195 | 1.94E-07    |
| 0.612064237  | 1.41E-26    | 0.870163382  | 1.20E-76 | -0.282837263 | 6.90E-06    |
| -0.345658987 | 2.78E-08    | -0.654811877 | 2.20E-31 | 0.294875255  | 2.64E-06    |
| -0.221234712 | 0.00048576  | -0.553775348 | 4.32E-21 | 0.424204702  | 4.03E-12    |
| -0.463345676 | 1.92E-14    | -0.713264875 | 2.23E-39 | 0.386169158  | 3.90E-10    |
| 0.281018839  | 7.95E-06    | 0.652975111  | 3.67E-31 | -0.181605581 | 0.004347358 |
| 0.748472879  | 3.07E-45    | 0.758491612  | 4.35E-47 | -0.295011815 | 2.61E-06    |
| 0.719796478  | 2.13E-40    | 0.800856687  | 4.94E-56 | -0.310032222 | 7.40E-07    |
| 0.465001525  | 1.51E-14    | 0.792380969  | 4.45E-54 | -0.258869039 | 4.11E-05    |
| 0.508091879  | 1.74E-17    | 0.880469171  | 1.00E-80 | -0.431534671 | 1.56E-12    |
| -0.413257707 | 1.59E-11    | -0.736775004 | 3.46E-43 | 0.524652236  | 9.92E-19    |
| 0.608744639  | 3.11E-26    | 0.83248497   | 2.95E-64 | -0.370389199 | 2.20E-09    |
| 0.616495723  | 4.85E-27    | 0.802441378  | 2.08E-56 | -0.3775276   | 1.02E-09    |
| 0.773017608  | 6.18E-50    | 0.747049434  | 5.53E-45 | -0.279960945 | 8.63E-06    |
| -0.459409009 | 3.40E-14    | -0.727794876 | 1.10E-41 | 0.583460517  | 9.55E-24    |
| -0.543202345 | 3.31E-20    | -0.767471119 | 7.99E-49 | 0.387248247  | 3.45E-10    |
| 0.551769845  | 6.40E-21    | 0.805009931  | 5.02E-57 | -0.393592331 | 1.67E-10    |

|              |             |              |           |              |             |
|--------------|-------------|--------------|-----------|--------------|-------------|
| -0.158990019 | 0.012712258 | -0.426156699 | 3.13E-12  | 0.328887599  | 1.37E-07    |
| 0.584032281  | 8.43E-24    | 0.606435246  | 5.37E-26  | 0.001078158  | 0.986604514 |
| 0.581067553  | 1.60E-23    | 0.668374648  | 4.46E-33  | -0.160497215 | 0.011880946 |
| 0.553559417  | 4.51E-21    | 0.658071929  | 8.77E-32  | -0.374703132 | 1.39E-09    |
| -0.050742352 | 0.42912424  | -0.5274043   | 6.07E-19  | 0.323707174  | 2.21E-07    |
| 0.713463878  | 2.07E-39    | 0.617552571  | 3.75E-27  | -0.096157365 | 0.133385663 |
| 0.281564304  | 7.62E-06    | 0.51766813   | 3.38E-18  | -0.278843153 | 9.40E-06    |
| 0.583572532  | 9.32E-24    | 0.797136074  | 3.66E-55  | -0.373147438 | 1.64E-09    |
| -0.242705376 | 0.000124526 | -0.438776761 | 5.96E-13  | 0.352278681  | 1.44E-08    |
| -0.410666155 | 2.19E-11    | -0.62104868  | 1.59E-27  | 0.539782232  | 6.29E-20    |
| 0.552184814  | 5.90E-21    | 0.783423175  | 4.15E-52  | -0.369063042 | 2.54E-09    |
| -0.367560887 | 2.98E-09    | -0.743953813 | 1.96E-44  | 0.423893228  | 4.19E-12    |
| 0.629182051  | 2.06E-28    | 0.759523794  | 2.77E-47  | -0.270718276 | 1.74E-05    |
| -0.257007586 | 4.68E-05    | -0.563784828 | 5.89E-22  | 0.355357878  | 1.06E-08    |
| -0.263098516 | 3.04E-05    | -0.415595183 | 1.19E-11  | 0.351662787  | 1.53E-08    |
| -0.352936537 | 1.35E-08    | -0.660090861 | 4.94E-32  | 0.384611515  | 4.64E-10    |
| 0.722797762  | 7.08E-41    | 0.669514932  | 3.18E-33  | -0.25239779  | 6.46E-05    |
| -0.460260371 | 3.01E-14    | -0.725276281 | 2.82E-41  | 0.267608213  | 2.19E-05    |
| -0.155089493 | 0.015105492 | -0.403785572 | 5.04E-11  | 0.288694725  | 4.35E-06    |
| -0.331128615 | 1.11E-07    | -0.625460863 | 5.29E-28  | 0.616261379  | 5.14E-27    |
| -0.387689176 | 3.28E-10    | -0.764388969 | 3.21E-48  | 0.384699321  | 4.60E-10    |
| 0.371126906  | 2.04E-09    | 0.646775305  | 2.02E-30  | -0.100321999 | 0.117299255 |
| 0.536909828  | 1.07E-19    | 0.694065638  | 1.53E-36  | -0.187429327 | 0.003230884 |
| 0.522950561  | 1.34E-18    | 0.504355191  | 3.25E-17  | -0.004523265 | 0.943844581 |
| 0.607755326  | 3.93E-26    | 0.940296779  | 9.88E-116 | -0.39250269  | 1.89E-10    |
| 0.462575005  | 2.15E-14    | 0.85440855   | 4.83E-71  | -0.256390228 | 4.89E-05    |
| -0.518056872 | 3.16E-18    | -0.692732558 | 2.36E-36  | 0.483201079  | 9.73E-16    |
| 0.619957702  | 2.08E-27    | 0.693554971  | 1.81E-36  | -0.284792491 | 5.92E-06    |
| -0.195184119 | 0.002147315 | -0.499479033 | 7.27E-17  | 0.333755784  | 8.72E-08    |
| -0.347605012 | 2.29E-08    | -0.42256817  | 4.96E-12  | 0.402007094  | 6.23E-11    |
| 0.502624484  | 4.33E-17    | 0.562208958  | 8.10E-22  | -0.245061159 | 0.000106425 |
| 0.453190753  | 8.22E-14    | 0.711391237  | 4.31E-39  | -0.354213156 | 1.18E-08    |
| 0.636559045  | 3.07E-29    | 0.616551415  | 4.79E-27  | -0.1582868   | 0.013117333 |
| 0.464493456  | 1.63E-14    | 0.543169545  | 3.33E-20  | -0.273003193 | 1.46E-05    |
| 0.437628411  | 6.96E-13    | 0.66206906   | 2.80E-32  | 0.000231337  | 0.997125647 |
| 0.541319785  | 4.72E-20    | 0.578919267  | 2.53E-23  | -0.119100898 | 0.062698905 |
| 0.558483418  | 1.71E-21    | 0.493427965  | 1.94E-16  | -0.112049893 | 0.080048417 |
| 0.427853378  | 2.52E-12    | 0.567152759  | 2.96E-22  | -0.192057266 | 0.002536503 |
| 0.579272503  | 2.35E-23    | 0.605122791  | 7.30E-26  | -0.247201543 | 9.21E-05    |
| 0.561539786  | 9.26E-22    | 0.874644378  | 2.24E-78  | -0.38173212  | 6.41E-10    |

|              |             |              |           |              |             |
|--------------|-------------|--------------|-----------|--------------|-------------|
| -0.28726024  | 4.88E-06    | -0.563707759 | 5.98E-22  | 0.477016866  | 2.52E-15    |
| -0.198648898 | 0.0017802   | -0.378338843 | 9.32E-10  | 0.556836317  | 2.37E-21    |
| -0.261005891 | 3.53E-05    | -0.367812229 | 2.90E-09  | 0.498028619  | 9.21E-17    |
| 0.347282553  | 2.37E-08    | 0.589570578  | 2.51E-24  | -0.216390077 | 0.000649123 |
| -0.462165456 | 2.28E-14    | -0.609937467 | 2.35E-26  | 0.292679669  | 3.16E-06    |
| -0.367524539 | 2.99E-09    | -0.660832727 | 3.99E-32  | 0.575569163  | 5.16E-23    |
| 0.130630766  | 0.041052375 | -0.413216715 | 1.60E-11  | 0.30088858   | 1.61E-06    |
| -0.264528339 | 2.74E-05    | -0.546930428 | 1.63E-20  | 0.38397761   | 4.99E-10    |
| -0.195846101 | 0.002072247 | -0.476868882 | 2.57E-15  | 0.349209383  | 1.96E-08    |
| -0.001014922 | 0.987390112 | -0.351680703 | 1.53E-08  | 0.34630591   | 2.61E-08    |
| -0.11068403  | 0.083820686 | -0.378534432 | 9.12E-10  | 0.313135898  | 5.65E-07    |
| -0.176206043 | 0.005681326 | -0.471375355 | 5.89E-15  | 0.462784136  | 2.09E-14    |
| -0.218639187 | 0.000567824 | -0.458793522 | 3.71E-14  | 0.388152311  | 3.12E-10    |
| -0.35016033  | 1.78E-08    | -0.669786739 | 2.93E-33  | 0.467707275  | 1.02E-14    |
| 0.705502581  | 3.33E-38    | 0.805179352  | 4.57E-57  | -0.286584182 | 5.14E-06    |
| -0.304357674 | 1.20E-06    | -0.658884023 | 6.96E-32  | 0.412396395  | 1.77E-11    |
| 0.86112372   | 2.40E-73    | 0.762480064  | 7.53E-48  | -0.268423471 | 2.06E-05    |
| -0.145391512 | 0.022833621 | -0.298557155 | 1.95E-06  | 0.33713486   | 6.33E-08    |
| -0.338532891 | 5.54E-08    | -0.452248748 | 9.39E-14  | 0.592957522  | 1.18E-24    |
| -0.453541877 | 7.83E-14    | -0.740822569 | 6.94E-44  | 0.337055881  | 6.38E-08    |
| -0.438961477 | 5.82E-13    | -0.622387275 | 1.14E-27  | 0.369228613  | 2.50E-09    |
| 0.723097777  | 6.34E-41    | 0.880632749  | 8.57E-81  | -0.306410812 | 1.01E-06    |
| -0.447177614 | 1.90E-13    | -0.760139948 | 2.12E-47  | 0.51366089   | 6.76E-18    |
| 0.708584371  | 1.15E-38    | 0.914029264  | 3.37E-97  | -0.381359339 | 6.68E-10    |
| 0.637098389  | 2.67E-29    | 0.913365519  | 8.23E-97  | -0.374807746 | 1.37E-09    |
| 0.650671966  | 6.94E-31    | 0.866822925  | 2.13E-75  | -0.488147355 | 4.49E-16    |
| 0.761280819  | 1.28E-47    | 0.924719764  | 6.45E-104 | -0.418999667 | 7.79E-12    |
| 0.426363774  | 3.05E-12    | 0.661285298  | 3.51E-32  | -0.220384062 | 0.000511359 |
| -0.011032302 | 0.863590866 | -0.380774147 | 7.12E-10  | 0.400699988  | 7.27E-11    |
| 0.638516561  | 1.84E-29    | 0.773426828  | 5.10E-50  | -0.239051198 | 0.000158397 |
| 0.488986004  | 3.93E-16    | 0.819327142  | 1.22E-60  | -0.268248064 | 2.09E-05    |
| -0.301422681 | 1.54E-06    | -0.535773164 | 1.32E-19  | 0.272460599  | 1.53E-05    |
| 0.76676153   | 1.10E-48    | 0.709854456  | 7.38E-39  | -0.054648809 | 0.394407668 |
| -0.230629555 | 0.000271936 | -0.413989611 | 1.46E-11  | 0.32680492   | 1.66E-07    |
| 0.390128775  | 2.49E-10    | 0.758168511  | 5.00E-47  | -0.13562726  | 0.033849516 |
| 0.442541925  | 3.59E-13    | 0.824761653  | 4.26E-62  | -0.316871137 | 4.07E-07    |
| -0.396596675 | 1.18E-10    | -0.655608834 | 1.76E-31  | 0.168311552  | 0.008293563 |
| 0.734650183  | 7.93E-43    | 0.801000727  | 4.57E-56  | -0.35018252  | 1.78E-08    |
| 0.711515392  | 4.13E-39    | 0.919868419  | 9.42E-101 | -0.34293332  | 3.62E-08    |
| 0.717584177  | 4.75E-40    | 0.86725418   | 1.47E-75  | -0.298770852 | 1.92E-06    |



|              |             |              |          |              |             |
|--------------|-------------|--------------|----------|--------------|-------------|
| 0.801821382  | 2.92E-56    | 0.740807676  | 6.98E-44 | -0.166855516 | 0.008878049 |
| 0.587516776  | 3.94E-24    | 0.843608642  | 1.44E-67 | -0.480987124 | 1.37E-15    |
| 0.571781103  | 1.14E-22    | 0.826782284  | 1.19E-62 | -0.442770625 | 3.48E-13    |
| 0.377113972  | 1.07E-09    | 0.549036644  | 1.09E-20 | -0.257180996 | 4.63E-05    |
| 0.495140552  | 1.47E-16    | 0.653348058  | 3.31E-31 | -0.098660258 | 0.12352632  |
| 0.543553962  | 3.09E-20    | 0.755510025  | 1.58E-46 | -0.238180466 | 0.000167651 |
| 0.4554501    | 5.98E-14    | 0.377478707  | 1.02E-09 | -0.116139477 | 0.069567039 |
| 0.493915629  | 1.79E-16    | 0.606229894  | 5.63E-26 | -0.354920025 | 1.10E-08    |
| 0.601849231  | 1.56E-25    | 0.851665004  | 3.91E-70 | -0.383100002 | 5.50E-10    |
| 0.639820463  | 1.30E-29    | 0.775616766  | 1.82E-50 | -0.310295522 | 7.24E-07    |
| 0.460488293  | 2.91E-14    | 0.750223481  | 1.48E-45 | -0.316528141 | 4.20E-07    |
| 0.664747678  | 1.29E-32    | 0.669059096  | 3.64E-33 | -0.180959784 | 0.004490474 |
| 0.824567287  | 4.81E-62    | 0.807472309  | 1.26E-57 | -0.126331531 | 0.0482444   |
| 0.592192989  | 1.40E-24    | 0.897537146  | 2.18E-88 | -0.370780594 | 2.11E-09    |
| -0.604521283 | 8.40E-26    | -0.838406897 | 5.46E-66 | 0.503066718  | 4.03E-17    |
| 0.572174973  | 1.05E-22    | 0.643136591  | 5.39E-30 | -0.400509661 | 7.44E-11    |
| 0.648976203  | 1.11E-30    | 0.620255311  | 1.93E-27 | -0.396848954 | 1.14E-10    |
| 0.573206034  | 8.47E-23    | 0.667137888  | 6.41E-33 | -0.335455841 | 7.42E-08    |
| 0.731122943  | 3.10E-42    | 0.889787646  | 9.42E-85 | -0.338849135 | 5.37E-08    |
| -0.237031772 | 0.000180635 | -0.605368547 | 6.89E-26 | 0.461871314  | 2.38E-14    |
| 0.826227027  | 1.69E-62    | 0.890744117  | 3.47E-85 | -0.237720256 | 0.000172744 |
| 0.71334466   | 2.16E-39    | 0.915861601  | 2.76E-98 | -0.273234922 | 1.44E-05    |
| -0.457596386 | 4.40E-14    | -0.675716726 | 4.95E-34 | 0.313371096  | 5.54E-07    |
| -0.40315022  | 5.44E-11    | -0.431203381 | 1.63E-12 | 0.117713115  | 0.065844722 |
| 0.643142225  | 5.38E-30    | 0.757919283  | 5.58E-47 | -0.319850035 | 3.12E-07    |
| 0.048142383  | 0.45317709  | -0.344485571 | 3.12E-08 | 0.088022787  | 0.169629351 |
| 0.515445665  | 4.97E-18    | 0.718484698  | 3.43E-40 | -0.481947993 | 1.18E-15    |
| -0.272672742 | 1.50E-05    | -0.590001523 | 2.28E-24 | 0.189452615  | 0.002908499 |
| -0.619490212 | 2.33E-27    | -0.719015257 | 2.83E-40 | 0.49798175   | 9.28E-17    |
| -0.313129142 | 5.66E-07    | -0.535469848 | 1.40E-19 | 0.270889283  | 1.72E-05    |
| -0.365184652 | 3.83E-09    | -0.645937482 | 2.53E-30 | 0.511009364  | 1.06E-17    |
| -0.466669464 | 1.18E-14    | -0.761919563 | 9.65E-48 | 0.533353314  | 2.07E-19    |
| -0.301369592 | 1.55E-06    | -0.563531395 | 6.20E-22 | 0.605556499  | 6.59E-26    |
| 0.660042402  | 5.01E-32    | 0.751746804  | 7.81E-46 | -0.356773543 | 9.14E-09    |
| 0.566525453  | 3.37E-22    | 0.734515368  | 8.36E-43 | -0.142286645 | 0.025941135 |
| -0.21973975  | 0.000531574 | -0.563702462 | 5.99E-22 | 0.487683676  | 4.83E-16    |
| -0.239138731 | 0.000157493 | -0.554798482 | 3.54E-21 | 0.472478532  | 4.99E-15    |
| 0.61748562   | 3.81E-27    | 0.871677631  | 3.18E-77 | -0.375039515 | 1.34E-09    |
| 0.59316474   | 1.13E-24    | 0.700383155  | 1.89E-37 | -0.297705816 | 2.10E-06    |
| 0.770583255  | 1.92E-49    | 0.775617739  | 1.82E-50 | -0.288354146 | 4.47E-06    |

|              |             |              |           |              |             |
|--------------|-------------|--------------|-----------|--------------|-------------|
| 0.70392226   | 5.71E-38    | 0.823005549  | 1.27E-61  | -0.349491228 | 1.90E-08    |
| -0.249916874 | 7.66E-05    | -0.57251287  | 9.79E-23  | 0.10403822   | 0.10426079  |
| -0.180992994 | 0.004483012 | -0.593607461 | 1.02E-24  | 0.300428332  | 1.67E-06    |
| 0.408795175  | 2.75E-11    | 0.506969215  | 2.10E-17  | 0.049240051  | 0.442931284 |
| 0.394942578  | 1.43E-10    | 0.751659757  | 8.10E-46  | -0.465956789 | 1.31E-14    |
| 0.51401438   | 6.36E-18    | 0.621644714  | 1.37E-27  | -0.31182689  | 6.34E-07    |
| 0.563956407  | 5.69E-22    | 0.668542672  | 4.24E-33  | -0.104874917 | 0.101489241 |
| -0.305584329 | 1.08E-06    | -0.477384017 | 2.38E-15  | 0.308799101  | 8.23E-07    |
| -0.223075172 | 0.000434387 | -0.29791217  | 2.06E-06  | 0.521476328  | 1.74E-18    |
| -0.414206842 | 1.42E-11    | -0.683352676 | 4.70E-35  | 0.39596943   | 1.27E-10    |
| 0.211126749  | 0.000883175 | 0.558450473  | 1.72E-21  | -0.316192078 | 4.32E-07    |
| -0.336576495 | 6.68E-08    | -0.55639752  | 2.58E-21  | 0.348921992  | 2.01E-08    |
| 0.803683668  | 1.05E-56    | 0.875470315  | 1.06E-78  | -0.391194621 | 2.20E-10    |
| 0.668348109  | 4.49E-33    | 0.614916705  | 7.11E-27  | -0.36121105  | 5.79E-09    |
| 0.645241094  | 3.06E-30    | 0.671296134  | 1.87E-33  | -0.343255271 | 3.51E-08    |
| 0.432644059  | 1.35E-12    | 0.4861609    | 6.14E-16  | -0.078613929 | 0.220157955 |
| -0.200109404 | 0.001643401 | -0.666731629 | 7.22E-33  | 0.290220189  | 3.85E-06    |
| 0.730667515  | 3.69E-42    | 0.659904452  | 5.21E-32  | -0.181464465 | 0.004378275 |
| 0.425257181  | 3.52E-12    | 0.718267749  | 3.71E-40  | -0.65736823  | 1.07E-31    |
| 0.32759482   | 1.55E-07    | 0.768266643  | 5.56E-49  | -0.445269893 | 2.47E-13    |
| 0.09943008   | 0.120610396 | 0.530837305  | 3.27E-19  | -0.512804318 | 7.82E-18    |
| 0.789999368  | 1.52E-53    | 0.943565737  | 1.29E-118 | -0.423967672 | 4.15E-12    |
| -0.107693699 | 0.092579033 | -0.403036111 | 5.51E-11  | 0.222470768  | 0.000450674 |
| 0.236428316  | 0.000187826 | 0.45544112   | 5.98E-14  | -0.331766721 | 1.05E-07    |
| 0.717693864  | 4.57E-40    | 0.749895974  | 1.70E-45  | -0.167050586 | 0.008797679 |
| 0.773048983  | 6.09E-50    | 0.781719306  | 9.59E-52  | -0.459585199 | 3.31E-14    |
| 0.668396353  | 4.43E-33    | 0.612434641  | 1.29E-26  | -0.17320442  | 0.006572054 |
| 0.654431824  | 2.44E-31    | 0.89206249   | 8.63E-86  | -0.351141529 | 1.61E-08    |
| 0.463448298  | 1.89E-14    | 0.838413644  | 5.44E-66  | -0.381129017 | 6.85E-10    |
| 0.350398997  | 1.74E-08    | 0.496425772  | 1.20E-16  | 0.016860416  | 0.792877181 |
| -0.43996168  | 5.08E-13    | -0.707416511 | 1.72E-38  | 0.589797516  | 2.38E-24    |
| -0.464098842 | 1.72E-14    | -0.628951881 | 2.19E-28  | 0.364613914  | 4.06E-09    |
| 0.617110064  | 4.18E-27    | 0.786485311  | 9.02E-53  | -0.106735759 | 0.095534294 |
| 0.356257079  | 9.63E-09    | 0.43645238   | 8.14E-13  | -0.002320188 | 0.971177899 |
| 0.486515664  | 5.80E-16    | 0.604458987  | 8.52E-26  | -0.332326466 | 9.97E-08    |
| 0.317061395  | 4.00E-07    | 0.576355775  | 4.37E-23  | -0.251060823 | 7.08E-05    |
| 0.782738363  | 5.81E-52    | 0.753369423  | 3.93E-46  | -0.375313154 | 1.30E-09    |
| 0.336361884  | 6.81E-08    | 0.733420668  | 1.28E-42  | -0.302491267 | 1.41E-06    |
| 0.267852008  | 2.15E-05    | 0.295999492  | 2.41E-06  | -0.249751751 | 7.75E-05    |
| -0.289229292 | 4.17E-06    | -0.605841696 | 6.17E-26  | 0.160974866  | 0.011627682 |

|              |             |              |           |              |             |
|--------------|-------------|--------------|-----------|--------------|-------------|
| 0.699754468  | 2.33E-37    | 0.880139851  | 1.37E-80  | -0.309531932 | 7.73E-07    |
| 0.75344423   | 3.81E-46    | 0.845332279  | 4.18E-68  | -0.37101619  | 2.06E-09    |
| 0.359567298  | 6.86E-09    | 0.658060697  | 8.80E-32  | -0.124312333 | 0.051969097 |
| 0.591471926  | 1.64E-24    | 0.817956693  | 2.79E-60  | -0.300051557 | 1.73E-06    |
| 0.531845249  | 2.72E-19    | 0.561356265  | 9.61E-22  | -0.246852747 | 9.43E-05    |
| 0.505477968  | 2.70E-17    | 0.726117031  | 2.06E-41  | -0.169263716 | 0.007930093 |
| 0.569900185  | 1.68E-22    | 0.670111153  | 2.66E-33  | -0.050125797 | 0.434760428 |
| -0.292398925 | 3.23E-06    | -0.42794937  | 2.49E-12  | 0.310158013  | 7.32E-07    |
| 0.509068071  | 1.48E-17    | 0.800245527  | 6.88E-56  | -0.215141095 | 0.000698789 |
| 0.557976068  | 1.89E-21    | 0.872496518  | 1.54E-77  | -0.325539065 | 1.87E-07    |
| 0.758419468  | 4.49E-47    | 0.68581121   | 2.17E-35  | -0.446798237 | 2.00E-13    |
| -0.262868823 | 3.09E-05    | -0.625382209 | 5.39E-28  | 0.423439991  | 4.44E-12    |
| 0.292820634  | 3.12E-06    | 0.715662299  | 9.48E-40  | -0.127581083 | 0.046053061 |
| 0.747420843  | 4.75E-45    | 0.93089956   | 2.86E-108 | -0.451292445 | 1.07E-13    |
| 0.677766692  | 2.65E-34    | 0.819025301  | 1.46E-60  | -0.216361647 | 0.000650216 |
| 0.422481984  | 5.02E-12    | 0.469398378  | 7.91E-15  | -0.167716316 | 0.008528238 |
| -0.445150781 | 2.51E-13    | -0.741859728 | 4.58E-44  | 0.365490013  | 3.71E-09    |
| -0.303872379 | 1.25E-06    | -0.541560695 | 4.51E-20  | 0.541771084  | 4.33E-20    |
| -0.355244606 | 1.07E-08    | -0.541235597 | 4.79E-20  | 0.522682827  | 1.41E-18    |
| -0.191377085 | 0.002629227 | -0.486425563 | 5.89E-16  | 0.674335905  | 7.52E-34    |
| -0.186729311 | 0.003349743 | -0.496330398 | 1.21E-16  | 0.525818652  | 8.06E-19    |
| -0.613001193 | 1.13E-26    | -0.474500662 | 3.68E-15  | 0.244948389  | 0.000107232 |
| -0.237994714 | 0.00016969  | -0.546171756 | 1.88E-20  | 0.340141013  | 4.75E-08    |
| -0.029049939 | 0.650927831 | -0.463262959 | 1.95E-14  | 0.152834293  | 0.016661988 |
| 0.236683181  | 0.000184757 | 0.53799233   | 8.78E-20  | -0.17410004  | 0.006294039 |
| 0.601854719  | 1.56E-25    | 0.844673928  | 6.71E-68  | -0.381988399 | 6.23E-10    |
| 0.732921216  | 1.55E-42    | 0.924043364  | 1.83E-103 | -0.398312699 | 9.64E-11    |
| 0.628906249  | 2.21E-28    | 0.565985501  | 3.76E-22  | -0.416982775 | 1.00E-11    |
| 0.745963142  | 8.65E-45    | 0.818858373  | 1.62E-60  | -0.436600438 | 7.98E-13    |
| 0.509891346  | 1.28E-17    | 0.745593817  | 1.01E-44  | -0.347440701 | 2.33E-08    |
| -0.029104064 | 0.650320496 | -0.282650866 | 7.01E-06  | 0.191963803  | 0.002549066 |
| 0.347255973  | 2.37E-08    | 0.642468457  | 6.44E-30  | -0.457460956 | 4.49E-14    |
| 0.602736121  | 1.27E-25    | 0.700838052  | 1.62E-37  | -0.107697036 | 0.092568866 |
| -0.234213558 | 0.000216575 | -0.529597717 | 4.09E-19  | 0.425443283  | 3.44E-12    |
| -0.406630534 | 3.58E-11    | -0.750676768 | 1.22E-45  | 0.319130318  | 3.33E-07    |
| -0.28857539  | 4.39E-06    | -0.754461935 | 2.47E-46  | 0.569716288  | 1.75E-22    |
| 0.569614319  | 1.79E-22    | 0.743048193  | 2.83E-44  | -0.347203631 | 2.39E-08    |
| 0.48145157   | 1.28E-15    | 0.774904475  | 2.54E-50  | -0.294171305 | 2.80E-06    |
| 0.592578303  | 1.28E-24    | 0.590928334  | 1.85E-24  | -0.068271179 | 0.287151879 |
| -0.253840344 | 5.85E-05    | -0.395651931 | 1.32E-10  | 0.364985955  | 3.91E-09    |

|              |             |              |          |              |             |
|--------------|-------------|--------------|----------|--------------|-------------|
| -0.458634748 | 3.80E-14    | -0.584238955 | 8.06E-24 | 0.555182864  | 3.28E-21    |
| -0.175305552 | 0.005936449 | -0.44250355  | 3.60E-13 | 0.380380997  | 7.44E-10    |
| 0.499524911  | 7.22E-17    | 0.773735492  | 4.41E-50 | -0.332667086 | 9.65E-08    |
| 0.608155306  | 3.58E-26    | 0.897594143  | 2.05E-88 | -0.432684446 | 1.34E-12    |
| 0.543785849  | 2.96E-20    | 0.637298963  | 2.53E-29 | -0.228278903 | 0.000315122 |
| 0.619712463  | 2.21E-27    | 0.878928121  | 4.31E-80 | -0.345464125 | 2.83E-08    |
| 0.360803694  | 6.04E-09    | 0.804176167  | 7.98E-57 | -0.320397479 | 2.97E-07    |
| -0.478536336 | 2.00E-15    | -0.757100142 | 7.95E-47 | 0.39696168   | 1.13E-10    |
| -0.441456517 | 4.16E-13    | -0.666079534 | 8.74E-33 | 0.246041679  | 9.96E-05    |
| -0.315546469 | 4.58E-07    | -0.700210571 | 2.00E-37 | 0.336533776  | 6.70E-08    |
| -0.218616481 | 0.000568595 | -0.431065717 | 1.66E-12 | 0.405585502  | 4.06E-11    |
| -0.410192198 | 2.32E-11    | -0.536730897 | 1.11E-19 | 0.155391313  | 0.014907152 |
| 0.606639908  | 5.12E-26    | 0.689354228  | 7.02E-36 | -0.081699237 | 0.202526321 |
| -0.241925374 | 0.000131129 | -0.40781675  | 3.10E-11 | 0.409147409  | 2.64E-11    |
| 0.068656203  | 0.284435998 | -0.365605204 | 3.66E-09 | 0.111141932  | 0.082540418 |
| 0.638201094  | 2.00E-29    | 0.788986074  | 2.55E-53 | -0.106936286 | 0.09490953  |
| -0.171833597 | 0.007018862 | -0.353936646 | 1.22E-08 | 0.541599959  | 4.47E-20    |
| 0.20116999   | 0.001550161 | 0.468969858  | 8.42E-15 | -0.270958941 | 1.71E-05    |
| 0.170976554  | 0.007311795 | 0.637139966  | 2.64E-29 | -0.532693551 | 2.33E-19    |
| 0.553939948  | 4.19E-21    | 0.708589227  | 1.15E-38 | -0.356189147 | 9.70E-09    |
| 0.564973446  | 4.63E-22    | 0.6289221    | 2.20E-28 | -0.28031942  | 8.39E-06    |
| -0.394864428 | 1.44E-10    | -0.604745955 | 7.97E-26 | 0.349347604  | 1.93E-08    |
| -0.390710375 | 2.33E-10    | -0.548095936 | 1.30E-20 | 0.476396527  | 2.77E-15    |
| -0.458512354 | 3.86E-14    | -0.629700059 | 1.81E-28 | 0.467842381  | 9.95E-15    |
| -0.264758413 | 2.69E-05    | -0.496100782 | 1.26E-16 | 0.282726328  | 6.96E-06    |
| -0.275203618 | 1.24E-05    | -0.55060651  | 8.02E-21 | 0.74806051   | 3.64E-45    |
| -0.51028449  | 1.20E-17    | -0.705149169 | 3.75E-38 | 0.268022709  | 2.12E-05    |
| -0.170609875 | 0.007440419 | -0.414720889 | 1.33E-11 | 0.57335705   | 8.21E-23    |
| 0.55453608   | 3.72E-21    | 0.787532098  | 5.33E-53 | -0.587653809 | 3.82E-24    |
| -0.259818236 | 3.84E-05    | -0.456728553 | 4.98E-14 | 0.571809765  | 1.13E-22    |
| -0.371348292 | 1.99E-09    | -0.629202044 | 2.05E-28 | 0.224196511  | 0.000405608 |
| -0.211285251 | 0.000875117 | -0.474135787 | 3.89E-15 | 0.111317694  | 0.082053203 |
| -0.238829695 | 0.000160705 | -0.637919732 | 2.15E-29 | 0.564897621  | 4.70E-22    |
| 0.359198018  | 7.13E-09    | 0.578607558  | 2.71E-23 | -0.582167521 | 1.26E-23    |
| -0.215793802 | 0.000672412 | -0.624456134 | 6.80E-28 | 0.310552023  | 7.08E-07    |
| 0.001326166  | 0.983523547 | -0.403742846 | 5.06E-11 | 0.262591394  | 3.15E-05    |
| -0.263157811 | 3.02E-05    | -0.472529521 | 4.96E-15 | 0.396905531  | 1.14E-10    |
| 0.570461318  | 1.50E-22    | 0.757824591  | 5.81E-47 | -0.134717794 | 0.035074282 |
| 0.520921429  | 1.92E-18    | 0.865077008  | 9.25E-75 | -0.241244787 | 0.000137157 |
| 0.765782812  | 1.72E-48    | 0.897749063  | 1.72E-88 | -0.321471172 | 2.70E-07    |

|              |             |              |           |              |             |
|--------------|-------------|--------------|-----------|--------------|-------------|
| -0.354362488 | 1.17E-08    | -0.548219173 | 1.27E-20  | 0.295335301  | 2.55E-06    |
| -0.204083826 | 0.001318362 | -0.456629396 | 5.06E-14  | 0.502227298  | 4.63E-17    |
| 0.207950664  | 0.001059756 | 0.423418883  | 4.45E-12  | -0.137602101 | 0.031314682 |
| -0.39256733  | 1.88E-10    | -0.605236013 | 7.11E-26  | 0.342017278  | 3.96E-08    |
| 0.525886807  | 7.96E-19    | 0.614495805  | 7.88E-27  | -0.253697179 | 5.90E-05    |
| -0.495885516 | 1.30E-16    | -0.775200963 | 2.21E-50  | 0.276358328  | 1.14E-05    |
| 0.20833911   | 0.00103654  | 0.621001574  | 1.61E-27  | -0.16808902  | 0.008380617 |
| 0.210715776  | 0.000904387 | 0.489401319  | 3.68E-16  | -0.43468067  | 1.03E-12    |
| -0.323122644 | 2.33E-07    | -0.679488705 | 1.56E-34  | 0.510595325  | 1.14E-17    |
| 0.358830686  | 7.40E-09    | 0.579556384  | 2.21E-23  | -0.153739455 | 0.016021201 |
| 0.450730435  | 1.16E-13    | 0.689872806  | 5.95E-36  | -0.363859567 | 4.40E-09    |
| 0.628538488  | 2.43E-28    | 0.651465685  | 5.58E-31  | -0.229002471 | 0.000301193 |
| 0.060263152  | 0.34757797  | -0.38905098  | 2.81E-10  | 0.368330423  | 2.75E-09    |
| 0.441962379  | 3.88E-13    | 0.77191862   | 1.03E-49  | -0.318153502 | 3.63E-07    |
| 0.793851332  | 2.07E-54    | 0.769770161  | 2.79E-49  | -0.280648995 | 8.18E-06    |
| -0.285188159 | 5.74E-06    | -0.411245611 | 2.04E-11  | 0.411203055  | 2.05E-11    |
| 0.328847108  | 1.38E-07    | 0.689828245  | 6.03E-36  | -0.352595455 | 1.39E-08    |
| 0.259366226  | 3.97E-05    | 0.656599455  | 1.33E-31  | -0.406953765 | 3.44E-11    |
| 0.688748549  | 8.53E-36    | 0.926949404  | 1.92E-105 | -0.403994831 | 4.91E-11    |
| 0.409239045  | 2.61E-11    | 0.65397038   | 2.78E-31  | -0.330333975 | 1.20E-07    |
| 0.62282141   | 1.02E-27    | 0.752909876  | 4.78E-46  | -0.14919387  | 0.019470294 |
| 0.662980271  | 2.15E-32    | 0.572454265  | 9.91E-23  | -0.064327537 | 0.315969468 |
| 0.554248067  | 3.94E-21    | 0.546070432  | 1.92E-20  | -0.305465274 | 1.09E-06    |
| 0.246640664  | 9.57E-05    | 0.504652637  | 3.10E-17  | 0.06875889   | 0.283714588 |
| 0.457502689  | 4.46E-14    | 0.666443289  | 7.86E-33  | -0.21677986  | 0.000634304 |
| 0.748969535  | 2.50E-45    | 0.884878315  | 1.38E-82  | -0.33440165  | 8.20E-08    |
| -0.24236462  | 0.000127371 | -0.593010695 | 1.16E-24  | 0.307368487  | 9.31E-07    |
| 0.479804405  | 1.64E-15    | 0.777544816  | 7.24E-51  | -0.305752736 | 1.07E-06    |
| 0.654300934  | 2.54E-31    | 0.919955436  | 8.30E-101 | -0.344642065 | 3.07E-08    |
| 0.594076994  | 9.17E-25    | 0.830617916  | 1.00E-63  | -0.387014759 | 3.54E-10    |
| -0.364008119 | 4.33E-09    | -0.632683619 | 8.41E-29  | 0.566148008  | 3.64E-22    |
| 0.392966237  | 1.80E-10    | 0.595160683  | 7.19E-25  | -0.216317853 | 0.000651903 |
| 0.736707126  | 3.55E-43    | 0.563701294  | 5.99E-22  | -0.345941916 | 2.70E-08    |
| 0.751972739  | 7.10E-46    | 0.759180799  | 3.22E-47  | -0.219597283 | 0.000536143 |
| 0.393097503  | 1.77E-10    | 0.779078647  | 3.46E-51  | -0.350407916 | 1.74E-08    |
| 0.730176791  | 4.44E-42    | 0.713120531  | 2.34E-39  | -0.196547935 | 0.00199528  |
| 0.546321345  | 1.83E-20    | 0.822592389  | 1.65E-61  | -0.143545379 | 0.024640063 |
| 0.378850831  | 8.81E-10    | 0.685956422  | 2.07E-35  | -0.114684732 | 0.073159184 |
| 0.644224405  | 4.02E-30    | 0.70489738   | 4.09E-38  | -0.12465495  | 0.051320755 |
| 0.581711091  | 1.39E-23    | 0.61114258   | 1.76E-26  | -0.293450211 | 2.97E-06    |

|              |             |              |          |              |             |
|--------------|-------------|--------------|----------|--------------|-------------|
| 0.479754718  | 1.66E-15    | 0.734696827  | 7.79E-43 | -0.116925471 | 0.067686914 |
| 0.612017248  | 1.43E-26    | 0.767291229  | 8.67E-49 | -0.303948367 | 1.24E-06    |
| 0.551826064  | 6.33E-21    | 0.71937879   | 2.48E-40 | -0.16109567  | 0.011564388 |
| 0.499151773  | 7.67E-17    | 0.805986399  | 2.91E-57 | -0.246227624 | 9.84E-05    |
| 0.526274053  | 7.43E-19    | 0.667539421  | 5.70E-33 | -0.104586601 | 0.102437625 |
| 0.411444793  | 1.99E-11    | 0.789351819  | 2.11E-53 | -0.262041143 | 3.28E-05    |
| -0.511454668 | 9.85E-18    | -0.875394978 | 1.13E-78 | 0.539390932  | 6.77E-20    |
| 0.629883079  | 1.73E-28    | 0.680648343  | 1.09E-34 | -0.119592018 | 0.061615663 |
| -0.295755127 | 2.46E-06    | -0.664842499 | 1.25E-32 | 0.225770461  | 0.00036819  |
| -0.40939542  | 2.56E-11    | -0.789187722 | 2.30E-53 | 0.241252433  | 0.000137087 |
| 0.644189891  | 4.06E-30    | 0.730654239  | 3.70E-42 | -0.427811267 | 2.53E-12    |
| 0.595701021  | 6.36E-25    | 0.639442858  | 1.44E-29 | -0.292551088 | 3.19E-06    |
| 0.515143534  | 5.24E-18    | 0.609818731  | 2.41E-26 | -0.279294759 | 9.08E-06    |
| 0.853042417  | 1.38E-70    | 0.709050726  | 9.77E-39 | -0.08069082  | 0.208172931 |
| 0.31905594   | 3.35E-07    | 0.583680368  | 9.10E-24 | -0.472889432 | 4.70E-15    |
| 0.511060789  | 1.05E-17    | 0.497084294  | 1.07E-16 | -0.116882432 | 0.067788779 |
| 0.280960095  | 7.99E-06    | 0.670725285  | 2.22E-33 | -0.279767238 | 8.76E-06    |
| -0.416272633 | 1.10E-11    | -0.480720862 | 1.43E-15 | 0.275101526  | 1.25E-05    |
| -0.225177527 | 0.000381893 | -0.424868194 | 3.70E-12 | 0.340869189  | 4.43E-08    |
| -0.193029052 | 0.00240918  | -0.473774543 | 4.11E-15 | 0.461865513  | 2.38E-14    |
| 0.496933055  | 1.10E-16    | 0.713444573  | 2.09E-39 | -0.164132706 | 0.010069874 |
| 0.810716588  | 1.98E-58    | 0.79535869   | 9.38E-55 | -0.232519862 | 0.000241277 |
| 0.636970289  | 2.76E-29    | 0.805202503  | 4.51E-57 | -0.388357526 | 3.04E-10    |
| 0.49082505   | 2.94E-16    | 0.616849109  | 4.45E-27 | -0.35565398  | 1.02E-08    |
| 0.751784557  | 7.69E-46    | 0.800237163  | 6.91E-56 | -0.239136087 | 0.000157521 |
| 0.606679032  | 5.07E-26    | 0.818611175  | 1.88E-60 | -0.232418281 | 0.000242839 |
| 0.57411533   | 7.00E-23    | 0.873518534  | 6.18E-78 | -0.366009591 | 3.51E-09    |
| 0.673527088  | 9.59E-34    | 0.621352327  | 1.47E-27 | -0.320442599 | 2.96E-07    |
| 0.335474798  | 7.41E-08    | 0.625681163  | 5.00E-28 | -0.168087681 | 0.008381143 |
| 0.538445734  | 8.07E-20    | 0.799315011  | 1.14E-55 | -0.248052245 | 8.70E-05    |
| -0.515852278 | 4.63E-18    | -0.722408212 | 8.18E-41 | 0.371599271  | 1.94E-09    |
| 0.481746613  | 1.22E-15    | 0.634969014  | 4.65E-29 | -0.084340264 | 0.188265301 |
| -0.293536646 | 2.95E-06    | -0.639111866 | 1.57E-29 | 0.388793444  | 2.90E-10    |
| 0.75713862   | 7.82E-47    | 0.831698614  | 4.95E-64 | -0.389355157 | 2.72E-10    |
| 0.434394458  | 1.07E-12    | 0.769928905  | 2.59E-49 | -0.358478831 | 7.67E-09    |
| 0.711459161  | 4.21E-39    | 0.75824813   | 4.83E-47 | -0.206586089 | 0.001145153 |
| -0.242841676 | 0.000123405 | -0.596955933 | 4.79E-25 | 0.209207487  | 0.000986322 |
| 0.640765144  | 1.01E-29    | 0.775782998  | 1.68E-50 | -0.188018631 | 0.003133798 |
| -0.361446829 | 5.65E-09    | -0.701624066 | 1.24E-37 | 0.476236426  | 2.83E-15    |
| 0.028486673  | 0.657261855 | 0.572119673  | 1.06E-22 | -0.295897598 | 2.43E-06    |

|              |             |              |           |              |             |
|--------------|-------------|--------------|-----------|--------------|-------------|
| -0.427636618 | 2.59E-12    | -0.591506182 | 1.63E-24  | 0.163902194  | 0.010176995 |
| 0.471234388  | 6.02E-15    | 0.330563829  | 1.17E-07  | 0.103669167  | 0.105502109 |
| 0.447652506  | 1.78E-13    | 0.502187381  | 4.66E-17  | -0.502037395 | 4.77E-17    |
| 0.293218112  | 3.02E-06    | 0.567392224  | 2.82E-22  | -0.333315894 | 9.08E-08    |
| 0.511406572  | 9.93E-18    | 0.790798133  | 1.01E-53  | -0.355914184 | 9.97E-09    |
| -0.321730247 | 2.64E-07    | -0.650226115 | 7.85E-31  | 0.621819684  | 1.31E-27    |
| -0.322450415 | 2.47E-07    | -0.546668775 | 1.71E-20  | 0.512165658  | 8.73E-18    |
| -0.156781451 | 0.01402278  | -0.512554721 | 8.17E-18  | 0.381575472  | 6.52E-10    |
| 0.424378292  | 3.94E-12    | 0.724803585  | 3.37E-41  | -0.348813245 | 2.03E-08    |
| -0.412618067 | 1.72E-11    | -0.645185918 | 3.10E-30  | 0.462125821  | 2.30E-14    |
| -0.251133482 | 7.05E-05    | -0.427525087 | 2.63E-12  | 0.506001578  | 2.47E-17    |
| 0.551629582  | 6.57E-21    | 0.572996277  | 8.85E-23  | -0.270613824 | 1.75E-05    |
| -0.199493439 | 0.001699879 | -0.540821035 | 5.18E-20  | 0.549829828  | 9.32E-21    |
| 0.752983745  | 4.63E-46    | 0.907923404  | 9.61E-94  | -0.447196974 | 1.90E-13    |
| -0.04916508  | 0.44362686  | -0.374655602 | 1.39E-09  | 0.275533959  | 1.21E-05    |
| 0.829139389  | 2.62E-63    | 0.847741339  | 7.25E-69  | -0.323125891 | 2.33E-07    |
| 0.802665365  | 1.84E-56    | 0.862401346  | 8.47E-74  | -0.277623292 | 1.03E-05    |
| -0.528795755 | 4.72E-19    | -0.551180441 | 7.17E-21  | 0.414654849  | 1.34E-11    |
| 0.655833595  | 1.65E-31    | 0.884830865  | 1.44E-82  | -0.244858857 | 0.000107877 |
| -0.256828499 | 4.74E-05    | -0.438001192 | 6.62E-13  | 0.55693153   | 2.32E-21    |
| 0.689879852  | 5.93E-36    | 0.613540135  | 9.92E-27  | -0.2110568   | 0.000886753 |
| -0.285047647 | 5.81E-06    | -0.529340371 | 4.28E-19  | 0.383525208  | 5.25E-10    |
| -0.491084516 | 2.82E-16    | -0.661620154 | 3.18E-32  | 0.447754192  | 1.76E-13    |
| -0.070015987 | 0.274982926 | -0.498547113 | 8.47E-17  | 0.429285911  | 2.09E-12    |
| -0.266490092 | 2.37E-05    | -0.392627972 | 1.87E-10  | 0.472420572  | 5.04E-15    |
| 0.506347152  | 2.33E-17    | 0.421007899  | 6.05E-12  | -0.111634151 | 0.081181822 |
| 0.802618041  | 1.89E-56    | 0.934600101  | 4.48E-111 | -0.327063556 | 1.62E-07    |
| 0.617196453  | 4.09E-27    | 0.865929047  | 4.52E-75  | -0.342969368 | 3.61E-08    |
| -0.395776843 | 1.30E-10    | -0.756717187 | 9.38E-47  | 0.461199563  | 2.63E-14    |
| -0.402810972 | 5.66E-11    | -0.701237083 | 1.42E-37  | 0.527116008  | 6.39E-19    |
| -0.526112976 | 7.64E-19    | -0.778020293 | 5.77E-51  | 0.391981211  | 2.01E-10    |
| 0.825287532  | 3.06E-62    | 0.786483547  | 9.03E-53  | -0.107500868 | 0.093167979 |
| 0.192851798  | 0.002431961 | 0.380027657  | 7.74E-10  | -0.388876993 | 2.87E-10    |
| -0.262255884 | 3.23E-05    | -0.346247766 | 2.62E-08  | 0.352441475  | 1.42E-08    |
| 0.367274502  | 3.07E-09    | 0.555105782  | 3.33E-21  | -0.188406204 | 0.003071395 |
| 0.344007855  | 3.26E-08    | 0.624455482  | 6.80E-28  | -0.354234292 | 1.18E-08    |
| -0.185830534 | 0.00350815  | -0.579546521 | 2.22E-23  | 0.322827768  | 2.39E-07    |
| -0.251836277 | 6.72E-05    | -0.483924485 | 8.70E-16  | 0.244032232  | 0.000114004 |
| -0.293896412 | 2.86E-06    | -0.465492525 | 1.41E-14  | 0.627274603  | 3.35E-28    |
| 0.767253489  | 8.82E-49    | 0.87989774   | 1.72E-80  | -0.442901519 | 3.41E-13    |

|              |             |              |           |              |             |
|--------------|-------------|--------------|-----------|--------------|-------------|
| 0.529659573  | 4.04E-19    | 0.795004098  | 1.13E-54  | -0.408503775 | 2.85E-11    |
| 0.655344299  | 1.89E-31    | 0.754414141  | 2.52E-46  | -0.593040196 | 1.16E-24    |
| -0.290693857 | 3.71E-06    | -0.644461304 | 3.77E-30  | 0.234778598  | 0.000208874 |
| 0.393607025  | 1.67E-10    | 0.584853712  | 7.05E-24  | -0.127082112 | 0.046917905 |
| 0.605421978  | 6.81E-26    | 0.670774195  | 2.19E-33  | -0.123756171 | 0.053036026 |
| 0.366497211  | 3.33E-09    | 0.754725223  | 2.21E-46  | -0.365082381 | 3.87E-09    |
| -0.281404513 | 7.72E-06    | -0.63161916  | 1.11E-28  | 0.404160899  | 4.82E-11    |
| 0.688827988  | 8.31E-36    | 0.62534161   | 5.45E-28  | -0.355892342 | 9.99E-09    |
| -0.502227848 | 4.63E-17    | -0.601439457 | 1.72E-25  | 0.219938139  | 0.000525272 |
| 0.598975702  | 3.02E-25    | 0.81444919   | 2.25E-59  | -0.320832716 | 2.86E-07    |
| 0.547333845  | 1.51E-20    | 0.712918712  | 2.52E-39  | -0.180830107 | 0.004519718 |
| 0.720405025  | 1.71E-40    | 0.828455623  | 4.07E-63  | -0.223877943 | 0.000413599 |
| 0.649640223  | 9.22E-31    | 0.926287958  | 5.51E-105 | -0.396002893 | 1.26E-10    |
| 0.849440667  | 2.07E-69    | 0.82843996   | 4.11E-63  | -0.412711279 | 1.71E-11    |
| 0.633637212  | 6.57E-29    | 0.897106225  | 3.54E-88  | -0.385868419 | 4.03E-10    |
| 0.408017045  | 3.03E-11    | 0.713101748  | 2.36E-39  | -0.453655197 | 7.70E-14    |
| 0.514420727  | 5.93E-18    | 0.871138018  | 5.12E-77  | -0.363375726 | 4.62E-09    |
| 0.673750524  | 8.97E-34    | 0.799417121  | 1.08E-55  | -0.26464803  | 2.71E-05    |
| 0.696703813  | 6.42E-37    | 0.766245923  | 1.39E-48  | -0.27670474  | 1.11E-05    |
| -0.29167491  | 3.43E-06    | -0.4745931   | 3.63E-15  | 0.550877226  | 7.61E-21    |
| -0.385238419 | 4.33E-10    | -0.508335093 | 1.67E-17  | 0.24064783   | 0.000142656 |
| -0.614383211 | 8.09E-27    | -0.72684937  | 1.57E-41  | 0.336430977  | 6.77E-08    |
| -0.076930092 | 0.230229788 | -0.468667112 | 8.81E-15  | 0.484196282  | 8.34E-16    |
| -0.170147174 | 0.007605602 | -0.405638042 | 4.03E-11  | 0.481666174  | 1.23E-15    |
| 0.837174102  | 1.27E-65    | 0.722775155  | 7.14E-41  | -0.076581483 | 0.232355039 |
| 0.811061597  | 1.62E-58    | 0.727087197  | 1.43E-41  | -0.304893916 | 1.15E-06    |
| 0.629965767  | 1.69E-28    | 0.849669182  | 1.75E-69  | -0.430194638 | 1.86E-12    |
| 0.345911415  | 2.71E-08    | 0.50086447   | 5.79E-17  | -0.339559105 | 5.02E-08    |
| 0.776326932  | 1.30E-50    | 0.928545674  | 1.45E-106 | -0.442557858 | 3.58E-13    |
| 0.590046665  | 2.25E-24    | 0.839561877  | 2.46E-66  | -0.432983549 | 1.29E-12    |
| 0.767462452  | 8.02E-49    | 0.761307836  | 1.27E-47  | -0.219240807 | 0.000547734 |
| 0.257548476  | 4.51E-05    | 0.578403754  | 2.83E-23  | -0.11984485  | 0.061064035 |
| 0.54428833   | 2.69E-20    | 0.860372329  | 4.40E-73  | -0.326047091 | 1.78E-07    |
| 0.734738802  | 7.66E-43    | 0.639086068  | 1.58E-29  | -0.274257943 | 1.33E-05    |
| -0.082965759 | 0.195592659 | -0.478568835 | 1.99E-15  | 0.30647594   | 1.00E-06    |
| 0.081788331  | 0.202032824 | 0.477290913  | 2.41E-15  | -0.486965197 | 5.41E-16    |
| 0.445886937  | 2.27E-13    | 0.643209425  | 5.28E-30  | -0.240561269 | 0.000143471 |
| 0.682457215  | 6.22E-35    | 0.761173311  | 1.34E-47  | -0.340944352 | 4.39E-08    |
| 0.362352177  | 5.14E-09    | 0.623586586  | 8.46E-28  | -0.271719773 | 1.61E-05    |
| 0.617452372  | 3.84E-27    | 0.839883644  | 1.97E-66  | -0.444666853 | 2.68E-13    |



|              |             |              |          |              |             |
|--------------|-------------|--------------|----------|--------------|-------------|
| -0.331743587 | 1.05E-07    | -0.597009595 | 4.73E-25 | 0.422103041  | 5.26E-12    |
| 0.341881877  | 4.01E-08    | 0.622677825  | 1.06E-27 | -0.369964995 | 2.31E-09    |
| 0.393474771  | 1.69E-10    | 0.75982135   | 2.43E-47 | -0.246799272 | 9.47E-05    |
| -0.160918056 | 0.011657553 | -0.346960501 | 2.44E-08 | 0.571219051  | 1.28E-22    |
| -0.434753442 | 1.02E-12    | -0.851947926 | 3.16E-70 | 0.495375307  | 1.42E-16    |
| 0.756336526  | 1.11E-46    | 0.899601423  | 2.10E-89 | -0.233232746 | 0.000230576 |
| -0.206170425 | 0.001172395 | -0.469608818 | 7.66E-15 | 0.456075956  | 5.47E-14    |
| 0.746459692  | 7.05E-45    | 0.653110673  | 3.53E-31 | -0.507360512 | 1.97E-17    |
| 0.675869997  | 4.72E-34    | 0.797457039  | 3.08E-55 | -0.194088887 | 0.002276969 |
| 0.698574577  | 3.45E-37    | 0.875821915  | 7.67E-79 | -0.4131894   | 1.61E-11    |
| -0.285669181 | 5.53E-06    | -0.592972186 | 1.18E-24 | 0.202953894  | 0.001404189 |
| 0.422224203  | 5.18E-12    | 0.294987046  | 2.62E-06 | -0.238213619 | 0.00016729  |
| -0.187847458 | 0.003161722 | -0.357206585 | 8.74E-09 | 0.488689356  | 4.12E-16    |
| -0.285190595 | 5.74E-06    | -0.668404055 | 4.42E-33 | 0.347957912  | 2.21E-08    |
| 0.587524493  | 3.93E-24    | 0.641136033  | 9.19E-30 | 0.043028935  | 0.502618402 |
| 0.617530373  | 3.77E-27    | 0.671763619  | 1.63E-33 | -0.219659867 | 0.000534131 |
| -0.06820326  | 0.287632764 | -0.369614171 | 2.39E-09 | 0.615457058  | 6.24E-27    |
| 0.586086418  | 5.39E-24    | 0.827738577  | 6.45E-63 | -0.391402254 | 2.15E-10    |
| -0.348782146 | 2.04E-08    | -0.65772497  | 9.68E-32 | 0.614168394  | 8.52E-27    |
| 0.355836814  | 1.01E-08    | 0.744639924  | 1.48E-44 | -0.417720762 | 9.15E-12    |
| -0.426217807 | 3.11E-12    | -0.648729599 | 1.18E-30 | 0.408006844  | 3.03E-11    |
| 0.112965504  | 0.077597305 | 0.468978796  | 8.41E-15 | -0.288260368 | 4.50E-06    |
| 0.389495701  | 2.67E-10    | 0.584323319  | 7.92E-24 | -0.216436724 | 0.000647332 |
| 0.672425981  | 1.34E-33    | 0.808436823  | 7.30E-58 | -0.308492113 | 8.45E-07    |
| 0.717466854  | 4.96E-40    | 0.657617759  | 9.97E-32 | -0.387176971 | 3.48E-10    |
| -0.146855478 | 0.021483544 | -0.517536387 | 3.46E-18 | 0.352389908  | 1.42E-08    |
| 0.484927125  | 7.44E-16    | 0.667163237  | 6.36E-33 | -0.302712933 | 1.38E-06    |
| -0.276972221 | 1.08E-05    | -0.561128319 | 1.01E-21 | 0.182931084  | 0.004066412 |
| 0.538215785  | 8.42E-20    | 0.874944971  | 1.71E-78 | -0.347915233 | 2.22E-08    |
| 0.58940621   | 2.60E-24    | 0.83020197   | 1.32E-63 | -0.427171013 | 2.75E-12    |
| 0.375404729  | 1.28E-09    | 0.684407044  | 3.38E-35 | -0.193200507 | 0.002387328 |
| -0.318670733 | 3.47E-07    | -0.503502472 | 3.75E-17 | 0.140855561  | 0.02749165  |
| -0.273173701 | 1.45E-05    | -0.627888329 | 2.87E-28 | 0.276081153  | 1.16E-05    |
| -0.390475156 | 2.39E-10    | -0.643023451 | 5.55E-30 | 0.450503912  | 1.20E-13    |
| 0.595947344  | 6.02E-25    | 0.568343202  | 2.32E-22 | -0.271519288 | 1.64E-05    |
| 0.384870349  | 4.51E-10    | 0.583305011  | 9.87E-24 | -0.206236424 | 0.00116803  |
| -0.398762883 | 9.14E-11    | -0.710264076 | 6.40E-39 | 0.639620391  | 1.37E-29    |
| -0.185348642 | 0.003595843 | -0.435064872 | 9.79E-13 | 0.161204643  | 0.011507553 |
| -0.249714704 | 7.77E-05    | -0.492242048 | 2.34E-16 | 0.463602846  | 1.85E-14    |
| 0.215350485  | 0.000690225 | 0.611417289  | 1.65E-26 | -0.476379171 | 2.77E-15    |

|              |             |              |           |              |             |
|--------------|-------------|--------------|-----------|--------------|-------------|
| -0.35646302  | 9.43E-09    | -0.745274071 | 1.15E-44  | 0.462928441  | 2.04E-14    |
| 0.454715079  | 6.63E-14    | 0.823413177  | 9.89E-62  | -0.324599732 | 2.03E-07    |
| -0.233321704 | 0.000229272 | -0.354601542 | 1.14E-08  | 0.18298549   | 0.004055238 |
| 0.515432968  | 4.98E-18    | 0.587714775  | 3.77E-24  | -0.233493005 | 0.000226781 |
| -0.277577108 | 1.04E-05    | -0.641359005 | 8.66E-30  | 0.617040912  | 4.25E-27    |
| -0.224361252 | 0.000401532 | -0.61961959  | 2.26E-27  | 0.218039424  | 0.000588529 |
| -0.222526547 | 0.000449148 | -0.325701814 | 1.84E-07  | 0.176854749  | 0.005503674 |
| 0.062698459  | 0.328406213 | 0.376160837  | 1.18E-09  | -0.572953287 | 8.93E-23    |
| -0.404145683 | 4.83E-11    | -0.710738998 | 5.42E-39  | 0.336622846  | 6.65E-08    |
| 0.83206478   | 3.89E-64    | 0.866760217  | 2.24E-75  | -0.28397756  | 6.32E-06    |
| -0.406107382 | 3.81E-11    | -0.633708327 | 6.45E-29  | 0.423719101  | 4.29E-12    |
| -0.451530314 | 1.04E-13    | -0.649522765 | 9.53E-31  | 0.497977447  | 9.29E-17    |
| 0.332671996  | 9.65E-08    | 0.701030485  | 1.52E-37  | -0.261790247 | 3.33E-05    |
| 0.627878387  | 2.87E-28    | 0.660045741  | 5.00E-32  | -0.284652231 | 5.99E-06    |
| 0.625802327  | 4.85E-28    | 0.912340778  | 3.22E-96  | -0.419708049 | 7.13E-12    |
| 0.585706465  | 5.86E-24    | 0.832004786  | 4.05E-64  | -0.325526894 | 1.87E-07    |
| -0.333153084 | 9.22E-08    | -0.531178779 | 3.07E-19  | 0.378708443  | 8.95E-10    |
| -0.205002857 | 0.001252131 | -0.37171532  | 1.91E-09  | 0.365699822  | 3.62E-09    |
| -0.421382973 | 5.77E-12    | -0.654735943 | 2.25E-31  | 0.504954312  | 2.94E-17    |
| -0.218177019 | 0.000583718 | -0.562111541 | 8.26E-22  | 0.280969903  | 7.98E-06    |
| -0.338694678 | 5.45E-08    | -0.645001838 | 3.26E-30  | 0.539681905  | 6.41E-20    |
| -0.307752703 | 9.01E-07    | -0.587533533 | 3.93E-24  | 0.197361145  | 0.001909365 |
| -0.4268485   | 2.87E-12    | -0.753356664 | 3.95E-46  | 0.364903733  | 3.94E-09    |
| 0.349829774  | 1.84E-08    | 0.531255404  | 3.03E-19  | -0.266614338 | 2.35E-05    |
| 0.759895867  | 2.35E-47    | 0.843257497  | 1.84E-67  | -0.322899234 | 2.37E-07    |
| 0.357574757  | 8.42E-09    | 0.737766136  | 2.34E-43  | -0.309400701 | 7.82E-07    |
| 0.783875374  | 3.32E-52    | 0.78887881   | 2.69E-53  | -0.394642429 | 1.48E-10    |
| 0.792157437  | 5.00E-54    | 0.829903517  | 1.60E-63  | -0.426652619 | 2.94E-12    |
| 0.6229067    | 1.00E-27    | 0.867901667  | 8.48E-76  | -0.279067338 | 9.24E-06    |
| 0.562736067  | 7.28E-22    | 0.646819589  | 1.99E-30  | -0.332096863 | 1.02E-07    |
| -0.251695524 | 6.78E-05    | -0.402143783 | 6.13E-11  | 0.463397506  | 1.91E-14    |
| 0.720145374  | 1.88E-40    | 0.918848893  | 4.11E-100 | -0.319974932 | 3.09E-07    |
| -0.255980465 | 5.04E-05    | -0.562484062 | 7.66E-22  | 0.141758689  | 0.026504174 |
| 0.358653128  | 7.54E-09    | 0.651433316  | 5.63E-31  | -0.288765156 | 4.33E-06    |
| 0.501979459  | 4.82E-17    | 0.352882004  | 1.36E-08  | 0.039623813  | 0.537049088 |
| -0.405794205 | 3.96E-11    | -0.715940007 | 8.58E-40  | 0.32384482   | 2.18E-07    |
| -0.406118477 | 3.81E-11    | -0.650006207 | 8.34E-31  | 0.430552929  | 1.77E-12    |
| -0.194724117 | 0.002200928 | -0.371025939 | 2.06E-09  | 0.630201547  | 1.59E-28    |
| -0.282798669 | 6.93E-06    | -0.561588072 | 9.17E-22  | 0.577624587  | 3.34E-23    |
| -0.343830561 | 3.32E-08    | -0.375530691 | 1.27E-09  | 0.400536329  | 7.42E-11    |

|              |             |              |          |              |             |
|--------------|-------------|--------------|----------|--------------|-------------|
| 0.533941177  | 1.85E-19    | 0.528220964  | 5.24E-19 | 0.015361747  | 0.810924275 |
| -0.16765077  | 0.008554437 | -0.401791613 | 6.39E-11 | 0.587500284  | 3.95E-24    |
| -0.556234985 | 2.67E-21    | -0.715047398 | 1.18E-39 | 0.287632902  | 4.73E-06    |
| 0.63466816   | 5.03E-29    | 0.775285719  | 2.12E-50 | -0.328891356 | 1.37E-07    |
| 0.374824198  | 1.37E-09    | 0.396917689  | 1.13E-10 | -0.240426477 | 0.000144747 |
| -0.280803456 | 8.09E-06    | -0.316501274 | 4.21E-07 | 0.264912541  | 2.66E-05    |
| -0.302939297 | 1.36E-06    | -0.638712306 | 1.75E-29 | 0.476404368  | 2.76E-15    |
| -0.331789226 | 1.05E-07    | -0.426599118 | 2.96E-12 | 0.65862514   | 7.50E-32    |
| 0.348597746  | 2.08E-08    | 0.641470151  | 8.41E-30 | -0.080782875 | 0.207652819 |
| 0.428467964  | 2.32E-12    | 0.732576578  | 1.77E-42 | -0.18378457  | 0.003894289 |
| -0.261354751 | 3.44E-05    | -0.628488515 | 2.46E-28 | 0.281044684  | 7.94E-06    |
| -0.179957406 | 0.004721026 | -0.429402564 | 2.06E-12 | 0.160384195  | 0.011941579 |
| 0.350821485  | 1.67E-08    | 0.622701164  | 1.05E-27 | -0.424081204 | 4.09E-12    |
| 0.134728061  | 0.035060249 | 0.455279668  | 6.12E-14 | -0.362421191 | 5.11E-09    |
| 0.664607633  | 1.34E-32    | 0.83383971   | 1.20E-64 | -0.333880229 | 8.62E-08    |
| 0.832986515  | 2.12E-64    | 0.820666963  | 5.39E-61 | -0.307201597 | 9.44E-07    |
| 0.844974783  | 5.41E-68    | 0.707113737  | 1.91E-38 | -0.298379067 | 1.98E-06    |
| 0.417315403  | 9.63E-12    | 0.748976182  | 2.49E-45 | -0.179475601 | 0.004835588 |
| 0.683540055  | 4.43E-35    | 0.805199184  | 4.52E-57 | -0.177591983 | 0.00530784  |
| -0.485698219 | 6.60E-16    | -0.697648619 | 4.70E-37 | 0.144028287  | 0.024156038 |
| -0.455684884 | 5.78E-14    | -0.702940025 | 7.97E-38 | 0.269788874  | 1.86E-05    |
| -0.437824057 | 6.78E-13    | -0.621255955 | 1.51E-27 | 0.518312513  | 3.03E-18    |
| 0.725639908  | 2.47E-41    | 0.876503364  | 4.11E-79 | -0.365411497 | 3.74E-09    |
| -0.521383269 | 1.77E-18    | -0.605946733 | 6.02E-26 | 0.211776538  | 0.00085057  |
| 0.556440457  | 2.56E-21    | 0.838856515  | 4.01E-66 | -0.291950956 | 3.35E-06    |
| 0.665039581  | 1.18E-32    | 0.870686582  | 7.60E-77 | -0.33268461  | 9.64E-08    |
| -0.412333299 | 1.79E-11    | -0.527843522 | 5.61E-19 | 0.45203239   | 9.68E-14    |
| -0.351874902 | 1.50E-08    | -0.514085305 | 6.28E-18 | 0.332893877  | 9.45E-08    |
| -0.333611311 | 8.84E-08    | -0.648696111 | 1.19E-30 | 0.472559892  | 4.93E-15    |
| 0.6271139    | 3.49E-28    | 0.873788006  | 4.85E-78 | -0.524320469 | 1.05E-18    |
| 0.710167378  | 6.62E-39    | 0.714306087  | 1.54E-39 | -0.460690967 | 2.83E-14    |
| 0.610160603  | 2.23E-26    | 0.56437641   | 5.22E-22 | -0.271086877 | 1.69E-05    |
| -0.277803172 | 1.02E-05    | -0.449738492 | 1.33E-13 | 0.559366752  | 1.43E-21    |
| 0.473193929  | 4.49E-15    | 0.668720964  | 4.02E-33 | -0.195313961 | 0.002132398 |
| 0.620084064  | 2.02E-27    | 0.796817797  | 4.33E-55 | -0.310748583 | 6.96E-07    |
| 0.523742961  | 1.17E-18    | 0.772557243  | 7.66E-50 | -0.268777524 | 2.01E-05    |
| 0.422891757  | 4.76E-12    | 0.785191527  | 1.72E-52 | -0.209654557 | 0.000961351 |
| 0.54160737   | 4.47E-20    | 0.814044221  | 2.86E-59 | -0.572822383 | 9.18E-23    |
| 0.500109509  | 6.56E-17    | 0.622784798  | 1.03E-27 | -0.084835273 | 0.185676367 |
| 0.521903868  | 1.61E-18    | 0.426806647  | 2.88E-12 | -0.376505524 | 1.14E-09    |

|              |             |              |           |              |             |
|--------------|-------------|--------------|-----------|--------------|-------------|
| 0.654784429  | 2.21E-31    | 0.861544093  | 1.71E-73  | -0.498112023 | 9.09E-17    |
| -0.3471844   | 2.39E-08    | -0.526566648 | 7.05E-19  | 0.638083396  | 2.06E-29    |
| -0.314464226 | 5.03E-07    | -0.612348513 | 1.32E-26  | 0.561663598  | 9.04E-22    |
| 0.312455588  | 6.00E-07    | -0.231561076 | 0.0002564 | 0.116934412  | 0.067665768 |
| 0.596261116  | 5.60E-25    | 0.879418026  | 2.71E-80  | -0.413719219 | 1.51E-11    |
| 0.585513006  | 6.11E-24    | 0.58059946   | 1.77E-23  | -0.599767969 | 2.52E-25    |
| 0.81523092   | 1.42E-59    | 0.831743241  | 4.80E-64  | -0.336166293 | 6.94E-08    |
| 0.678141985  | 2.36E-34    | 0.695688353  | 8.98E-37  | -0.191701363 | 0.002584644 |
| 0.671349883  | 1.84E-33    | 0.931968734  | 4.59E-109 | -0.312262771 | 6.10E-07    |
| 0.740479383  | 7.96E-44    | 0.91668875   | 8.74E-99  | -0.422443628 | 5.04E-12    |
| 0.697466993  | 4.99E-37    | 0.875155376  | 1.41E-78  | -0.435688067 | 9.01E-13    |
| -0.394811118 | 1.45E-10    | -0.707751261 | 1.53E-38  | 0.496352682  | 1.21E-16    |
| 0.425800744  | 3.28E-12    | 0.645969697  | 2.51E-30  | -0.352291244 | 1.44E-08    |
| -0.176708158 | 0.005543377 | -0.436167646 | 8.45E-13  | 0.319224923  | 3.30E-07    |
| -0.400984216 | 7.03E-11    | -0.509519478 | 1.37E-17  | 0.371583034  | 1.94E-09    |
| 0.077007065  | 0.229762396 | -0.43699035  | 7.57E-13  | 0.256819014  | 4.75E-05    |
| -0.271758503 | 1.61E-05    | -0.581373463 | 1.50E-23  | 0.479234812  | 1.79E-15    |
| -0.366710006 | 3.26E-09    | -0.524033104 | 1.11E-18  | 0.391534232  | 2.12E-10    |
| 0.704267985  | 5.07E-38    | 0.894625906  | 5.47E-87  | -0.411023877 | 2.10E-11    |
| -0.280747745 | 8.12E-06    | -0.554211108 | 3.97E-21  | 0.53321582   | 2.12E-19    |
| 0.463645935  | 1.84E-14    | 0.636555425  | 3.08E-29  | -0.313162128 | 5.64E-07    |
| -0.128289167 | 0.044848708 | -0.501112105 | 5.56E-17  | 0.510987894  | 1.07E-17    |
| -0.260492436 | 3.66E-05    | -0.469074519 | 8.29E-15  | 0.194912245  | 0.002178856 |
| 0.562967509  | 6.95E-22    | 0.580413661  | 1.84E-23  | 0.023622081  | 0.712944439 |
| -0.218899615 | 0.000559045 | -0.4084971   | 2.86E-11  | 0.451151301  | 1.09E-13    |
| -0.338633417 | 5.49E-08    | -0.562043668 | 8.37E-22  | 0.53615386   | 1.23E-19    |
| 0.437390813  | 7.18E-13    | 0.683150563  | 5.01E-35  | -0.309359492 | 7.85E-07    |
| 0.483295289  | 9.59E-16    | 0.721623737  | 1.09E-40  | -0.290647439 | 3.72E-06    |
| -0.341033666 | 4.36E-08    | -0.630000278 | 1.67E-28  | 0.425083802  | 3.60E-12    |
| -0.460356828 | 2.96E-14    | -0.604973382 | 7.56E-26  | 0.362313074  | 5.16E-09    |
| -0.370946316 | 2.08E-09    | -0.5590642   | 1.52E-21  | 0.272764985  | 1.49E-05    |
| 0.547277743  | 1.52E-20    | 0.826121909  | 1.80E-62  | -0.265863123 | 2.48E-05    |
| 0.663318216  | 1.95E-32    | 0.821676813  | 2.90E-61  | -0.497659014 | 9.78E-17    |
| 0.495805048  | 1.32E-16    | 0.814305655  | 2.45E-59  | -0.279529919 | 8.92E-06    |
| -0.400773688 | 7.21E-11    | -0.592714873 | 1.24E-24  | 0.170778782  | 0.007380921 |
| -0.137447509 | 0.031507097 | -0.385701002 | 4.11E-10  | 0.217053693  | 0.000624081 |
| -0.442947759 | 3.39E-13    | -0.575354651 | 5.39E-23  | 0.240553232  | 0.000143546 |
| -0.434861963 | 1.01E-12    | -0.501109753 | 5.56E-17  | 0.174807209  | 0.006082005 |
| 0.635052022  | 4.55E-29    | 0.818817592  | 1.66E-60  | -0.26589038  | 2.48E-05    |
| -0.489219943 | 3.79E-16    | -0.781597161 | 1.02E-51  | 0.588639614  | 3.08E-24    |

|              |             |              |          |              |             |
|--------------|-------------|--------------|----------|--------------|-------------|
| 0.547021958  | 1.60E-20    | 0.725065521  | 3.05E-41 | -0.448442946 | 1.60E-13    |
| 0.086162761  | 0.178862826 | 0.560871386  | 1.06E-21 | -0.389963552 | 2.53E-10    |
| -0.278487098 | 9.66E-06    | -0.447825321 | 1.74E-13 | 0.64829665   | 1.33E-30    |
| -0.487601025 | 4.89E-16    | -0.598403945 | 3.44E-25 | 0.492817706  | 2.14E-16    |
| -0.316110733 | 4.35E-07    | -0.620915315 | 1.64E-27 | 0.609253744  | 2.76E-26    |
| -0.400369669 | 7.56E-11    | -0.629315364 | 1.99E-28 | 0.46875599   | 8.69E-15    |
| 0.544348545  | 2.66E-20    | 0.614344582  | 8.17E-27 | -0.105445623 | 0.099632467 |
| 0.345842731  | 2.73E-08    | 0.647172361  | 1.81E-30 | -0.305421645 | 1.10E-06    |
| 0.558701775  | 1.63E-21    | 0.829308392  | 2.35E-63 | -0.264815386 | 2.68E-05    |
| 0.425913684  | 3.23E-12    | 0.804921312  | 5.27E-57 | -0.407886829 | 3.07E-11    |
| 0.61396077   | 8.96E-27    | 0.535655373  | 1.35E-19 | -0.059295356 | 0.355389419 |
| 0.701708694  | 1.21E-37    | 0.755081234  | 1.90E-46 | -0.231838713 | 0.000251933 |
| -0.344931591 | 2.98E-08    | -0.584809716 | 7.12E-24 | 0.581131739  | 1.58E-23    |
| -0.294729615 | 2.67E-06    | -0.656347698 | 1.43E-31 | 0.495203576  | 1.46E-16    |
| -0.447186504 | 1.90E-13    | -0.545571441 | 2.11E-20 | 0.601234874  | 1.80E-25    |
| 0.737467246  | 2.63E-43    | 0.629593578  | 1.86E-28 | -0.288408898 | 4.45E-06    |
| -0.3174688   | 3.86E-07    | -0.484724028 | 7.68E-16 | 0.476217143  | 2.84E-15    |
| 0.430594405  | 1.76E-12    | 0.72164282   | 1.08E-40 | -0.333569728 | 8.87E-08    |
| 0.57539678   | 5.35E-23    | 0.858438625  | 2.07E-72 | -0.41575956  | 1.17E-11    |
| -0.318713262 | 3.46E-07    | -0.451788551 | 1.00E-13 | 0.434479474  | 1.06E-12    |
| 0.429969697  | 1.91E-12    | 0.695251906  | 1.04E-36 | -0.085505244 | 0.182214172 |
| 0.585301387  | 6.40E-24    | 0.634153924  | 5.75E-29 | -0.201108067 | 0.001555469 |
| -0.141609723 | 0.026664924 | -0.424256376 | 4.00E-12 | 0.491991308  | 2.44E-16    |
| 0.433207298  | 1.25E-12    | 0.677219702  | 3.13E-34 | -0.199398853 | 0.001708707 |
| 0.804827222  | 5.56E-57    | 0.768870684  | 4.22E-49 | -0.293492757 | 2.96E-06    |
| 0.617215477  | 4.07E-27    | 0.875588943  | 9.49E-79 | -0.232333002 | 0.000244158 |
| 0.477538165  | 2.33E-15    | 0.630791271  | 1.37E-28 | -0.179461385 | 0.004839006 |
| 0.700164106  | 2.03E-37    | 0.868732581  | 4.15E-76 | -0.29574495  | 2.46E-06    |
| 0.335733133  | 7.23E-08    | 0.589649499  | 2.46E-24 | -0.408081868 | 3.00E-11    |
| -0.207480465 | 0.001088497 | -0.406210766 | 3.77E-11 | 0.250337389  | 7.44E-05    |
| 0.321265394  | 2.75E-07    | 0.630638797  | 1.42E-28 | -0.277865271 | 1.01E-05    |
| -0.339127849 | 5.23E-08    | -0.66339444  | 1.91E-32 | 0.37216438   | 1.82E-09    |
| -0.180021126 | 0.004706059 | -0.642168149 | 6.98E-30 | 0.30095745   | 1.60E-06    |
| -0.09550365  | 0.136057885 | -0.34518984  | 2.91E-08 | 0.463476045  | 1.89E-14    |
| 0.406857385  | 3.48E-11    | 0.420075821  | 6.81E-12 | 0.019872547  | 0.756945487 |
| 0.332319625  | 9.97E-08    | 0.302202245  | 1.44E-06 | -0.510239983 | 1.21E-17    |
| 0.244757867  | 0.000108609 | 0.474871466  | 3.48E-15 | -0.328961491 | 1.36E-07    |
| 0.36283334   | 4.89E-09    | 0.716308059  | 7.52E-40 | -0.281941284 | 7.40E-06    |
| -0.196463894 | 0.002004357 | -0.388535935 | 2.98E-10 | 0.244274721  | 0.000112174 |
| 0.684220132  | 3.58E-35    | 0.634935041  | 4.70E-29 | -0.111886062 | 0.080493522 |

|              |             |              |          |              |             |
|--------------|-------------|--------------|----------|--------------|-------------|
| -0.230634087 | 0.000271858 | -0.64962696  | 9.26E-31 | 0.629984353  | 1.68E-28    |
| -0.285888359 | 5.44E-06    | -0.647304797 | 1.75E-30 | 0.647641622  | 1.59E-30    |
| -0.439719803 | 5.25E-13    | -0.653441241 | 3.22E-31 | 0.392221081  | 1.96E-10    |
| 0.675611294  | 5.11E-34    | 0.650480276  | 7.32E-31 | -0.196914902 | 0.001956083 |
| -0.091991753 | 0.151121698 | -0.379826315 | 7.91E-10 | 0.314733548  | 4.92E-07    |
| -0.484951493 | 7.41E-16    | -0.680378001 | 1.19E-34 | 0.506068291  | 2.44E-17    |
| -0.12130041  | 0.057966838 | -0.474627361 | 3.62E-15 | 0.535427952  | 1.41E-19    |
| -0.577355134 | 3.53E-23    | -0.565097018 | 4.51E-22 | -0.052290497 | 0.415159524 |
| 0.734483824  | 8.46E-43    | 0.911385439  | 1.13E-95 | -0.434942085 | 9.95E-13    |
| 0.333448641  | 8.97E-08    | 0.702233695  | 1.01E-37 | -0.179973496 | 0.004717243 |
| -0.469579547 | 7.70E-15    | -0.670100614 | 2.67E-33 | 0.407487917  | 3.23E-11    |
| 0.433674482  | 1.18E-12    | 0.716401985  | 7.27E-40 | -0.270555103 | 1.76E-05    |
| -0.446150073 | 2.19E-13    | -0.704264507 | 5.08E-38 | 0.329996432  | 1.24E-07    |
| 0.402078814  | 6.18E-11    | 0.54703925   | 1.59E-20 | -0.213812511 | 0.000755457 |
| 0.426283355  | 3.08E-12    | 0.579698845  | 2.15E-23 | -0.390444232 | 2.40E-10    |
| 0.274733623  | 1.29E-05    | 0.658756591  | 7.22E-32 | -0.414715576 | 1.33E-11    |
| 0.476809636  | 2.60E-15    | 0.891824995  | 1.11E-85 | -0.379553737 | 8.15E-10    |
| -0.248043972 | 8.70E-05    | -0.502808284 | 4.20E-17 | 0.543242347  | 3.28E-20    |
| -0.316424572 | 4.24E-07    | -0.72578692  | 2.33E-41 | 0.595696101  | 6.37E-25    |
| -0.362951187 | 4.83E-09    | -0.602109075 | 1.47E-25 | 0.397625229  | 1.04E-10    |
| -0.288329253 | 4.48E-06    | -0.474299019 | 3.80E-15 | 0.632249956  | 9.41E-29    |
| -0.464168817 | 1.71E-14    | -0.761131127 | 1.37E-47 | 0.411473148  | 1.99E-11    |
| 0.734796854  | 7.49E-43    | 0.623395554  | 8.87E-28 | -0.302408397 | 1.42E-06    |
| -0.018847091 | 0.769123912 | 0.351249658  | 1.60E-08 | -0.47698404  | 2.53E-15    |
| 0.701648566  | 1.23E-37    | 0.856013582  | 1.39E-71 | -0.185616128 | 0.003546925 |
| -0.477209849 | 2.44E-15    | -0.667380356 | 5.97E-33 | 0.228061077  | 0.000319432 |
| 0.299236892  | 1.85E-06    | 0.487648814  | 4.86E-16 | -0.258567292 | 4.20E-05    |
| 0.622537623  | 1.10E-27    | 0.751543025  | 8.51E-46 | -0.367327348 | 3.05E-09    |
| -0.234775069 | 0.000208921 | -0.689938232 | 5.82E-36 | 0.589946213  | 2.31E-24    |
| 0.542654862  | 3.67E-20    | 0.906050694  | 9.86E-93 | -0.349244436 | 1.95E-08    |
| 0.669432821  | 3.26E-33    | 0.826482368  | 1.44E-62 | -0.247934573 | 8.77E-05    |
| 0.182134246  | 0.004233273 | 0.598752676  | 3.18E-25 | -0.240792856 | 0.000141301 |
| -0.164974906 | 0.009686931 | -0.611384905 | 1.66E-26 | 0.521077095  | 1.87E-18    |
| -0.472038751 | 5.33E-15    | -0.784307601 | 2.68E-52 | 0.57408835   | 7.04E-23    |
| -0.347882986 | 2.23E-08    | -0.482068301 | 1.16E-15 | 0.277403308  | 1.05E-05    |
| 0.415753272  | 1.17E-11    | 0.443630889  | 3.09E-13 | -0.244036033 | 0.000113975 |
| 0.666759749  | 7.16E-33    | 0.711238403  | 4.55E-39 | -0.379219239 | 8.46E-10    |
| 0.414712754  | 1.33E-11    | 0.494852121  | 1.54E-16 | -0.054755709 | 0.393482028 |
| 0.587314655  | 4.12E-24    | 0.802097114  | 2.51E-56 | -0.399765946 | 8.12E-11    |
| 0.728720377  | 7.73E-42    | 0.731489698  | 2.69E-42 | -0.301021115 | 1.59E-06    |

|              |             |              |          |              |             |
|--------------|-------------|--------------|----------|--------------|-------------|
| 0.135121623  | 0.034525887 | 0.306362382  | 1.01E-06 | -0.536271554 | 1.21E-19    |
| 0.624508653  | 6.71E-28    | 0.861384464  | 1.94E-73 | -0.266425585 | 2.38E-05    |
| 0.332850195  | 9.49E-08    | 0.623342589  | 8.99E-28 | -0.25314513  | 6.14E-05    |
| 0.437346307  | 7.22E-13    | 0.609867035  | 2.39E-26 | -0.127714566 | 0.045823977 |
| 0.753452626  | 3.80E-46    | 0.84195329   | 4.64E-67 | -0.338250548 | 5.69E-08    |
| 0.397180814  | 1.10E-10    | 0.638702324  | 1.75E-29 | -0.153917467 | 0.015897747 |
| 0.531694708  | 2.79E-19    | 0.779792198  | 2.45E-51 | -0.322343765 | 2.50E-07    |
| 0.472782346  | 4.77E-15    | 0.761214174  | 1.32E-47 | -0.423255658 | 4.55E-12    |
| 0.617396939  | 3.89E-27    | 0.87576615   | 8.07E-79 | -0.390298077 | 2.44E-10    |
| 0.456608447  | 5.07E-14    | 0.689965314  | 5.77E-36 | -0.334775889 | 7.92E-08    |
| 0.380592684  | 7.27E-10    | 0.446275456  | 2.15E-13 | -0.075688839 | 0.237859877 |
| 0.694427114  | 1.36E-36    | 0.715717871  | 9.29E-40 | -0.263027118 | 3.05E-05    |
| 0.63046685   | 1.49E-28    | 0.873770773  | 4.93E-78 | -0.321637915 | 2.66E-07    |
| 0.727269019  | 1.34E-41    | 0.7942162    | 1.71E-54 | -0.222995211 | 0.00043651  |
| 0.690012355  | 5.69E-36    | 0.879769827  | 1.95E-80 | -0.297186665 | 2.19E-06    |
| 0.405750273  | 3.98E-11    | 0.772383723  | 8.31E-50 | -0.210095807 | 0.000937276 |
| 0.407452917  | 3.24E-11    | 0.71639177   | 7.30E-40 | -0.157476052 | 0.01359839  |
| -0.403883083 | 4.98E-11    | -0.58751513  | 3.94E-24 | 0.29608759   | 2.39E-06    |
| -0.499540193 | 7.20E-17    | -0.487243213 | 5.18E-16 | 0.269703079  | 1.87E-05    |
| -0.261652025 | 3.37E-05    | -0.384384138 | 4.76E-10 | 0.334018021  | 8.50E-08    |
| -0.032333879 | 0.614508245 | -0.408754346 | 2.77E-11 | 0.159189552  | 0.012599343 |
| 0.465590945  | 1.39E-14    | 0.825259285  | 3.11E-62 | -0.28298176  | 6.83E-06    |
| 0.362320972  | 5.16E-09    | 0.627631196  | 3.06E-28 | -0.1110704   | 0.082739374 |
| 0.096170466  | 0.133332524 | 0.422736332  | 4.86E-12 | -0.418327816 | 8.48E-12    |
| -0.462396203 | 2.21E-14    | -0.66910173  | 3.59E-33 | 0.539992102  | 6.05E-20    |
| 0.521940749  | 1.60E-18    | 0.666488917  | 7.76E-33 | -0.395944547 | 1.27E-10    |
| -0.362772879 | 4.92E-09    | -0.667287484 | 6.14E-33 | 0.212596313  | 0.000811018 |
| 0.025812577  | 0.687660847 | -0.447064805 | 1.93E-13 | 0.527257998  | 6.23E-19    |
| 0.103653096  | 0.105556428 | 0.525799295  | 8.09E-19 | -0.254615349 | 5.54E-05    |
| 0.033847514  | 0.59802757  | -0.402662874 | 5.76E-11 | 0.283003713  | 6.82E-06    |
| 0.353531537  | 1.27E-08    | 0.63004899   | 1.65E-28 | -0.221382429 | 0.000481438 |
| -0.230337006 | 0.000276993 | -0.326540526 | 1.70E-07 | 0.455824203  | 5.67E-14    |
| 0.439089726  | 5.72E-13    | 0.78004076   | 2.17E-51 | -0.286852689 | 5.04E-06    |
| 0.52516489   | 9.05E-19    | 0.567849243  | 2.57E-22 | -0.386040111 | 3.96E-10    |
| 0.471056443  | 6.18E-15    | 0.66079873   | 4.03E-32 | -0.377221009 | 1.05E-09    |
| 0.619234305  | 2.48E-27    | 0.672069981  | 1.49E-33 | -0.181700217 | 0.004326734 |
| 0.371022437  | 2.06E-09    | 0.639178384  | 1.54E-29 | -0.225746698 | 0.00036873  |
| 0.38395173   | 5.00E-10    | 0.736423563  | 3.97E-43 | -0.132418173 | 0.038339933 |
| 0.731433413  | 2.75E-42    | 0.837765214  | 8.48E-66 | -0.157886634 | 0.01335287  |
| 0.791568741  | 6.78E-54    | 0.8988278    | 5.08E-89 | -0.349706972 | 1.86E-08    |

|              |             |              |           |              |             |
|--------------|-------------|--------------|-----------|--------------|-------------|
| 0.608575946  | 3.24E-26    | 0.763815098  | 4.16E-48  | -0.275573814 | 1.21E-05    |
| -0.273480762 | 1.41E-05    | -0.560667949 | 1.10E-21  | 0.437777409  | 6.82E-13    |
| 0.615155407  | 6.72E-27    | 0.860847799  | 3.00E-73  | -0.381054521 | 6.91E-10    |
| -0.415700356 | 1.18E-11    | -0.64404206  | 4.22E-30  | 0.326500143  | 1.71E-07    |
| 0.679087906  | 1.77E-34    | 0.83854528   | 4.97E-66  | -0.333654604 | 8.80E-08    |
| -0.455727571 | 5.75E-14    | -0.650846857 | 6.62E-31  | 0.293247401  | 3.02E-06    |
| 0.605460731  | 6.74E-26    | 0.700345964  | 1.91E-37  | -0.192882097 | 0.002428053 |
| 0.66108079   | 3.72E-32    | 0.91854888   | 6.32E-100 | -0.284045219 | 6.28E-06    |
| 0.675154389  | 5.87E-34    | 0.750590027  | 1.27E-45  | -0.43779828  | 6.80E-13    |
| 0.356510283  | 9.38E-09    | 0.649505918  | 9.57E-31  | -0.251947335 | 6.66E-05    |
| 0.706591019  | 2.29E-38    | 0.859851954  | 6.69E-73  | -0.251888653 | 6.69E-05    |
| -0.600899716 | 1.94E-25    | -0.784278636 | 2.72E-52  | 0.413446963  | 1.56E-11    |
| -0.293762917 | 2.89E-06    | -0.309977567 | 7.44E-07  | 0.694268258  | 1.43E-36    |
| -0.237825583 | 0.000171566 | -0.544114252 | 2.78E-20  | 0.163637767  | 0.010301117 |
| 0.673594394  | 9.40E-34    | 0.855678288  | 1.81E-71  | -0.284621791 | 6.00E-06    |
| 0.550758824  | 7.78E-21    | 0.685016206  | 2.79E-35  | -0.006115339 | 0.924130901 |
| 0.712752408  | 2.67E-39    | 0.838532728  | 5.01E-66  | -0.155128544 | 0.0150797   |
| 0.391624912  | 2.10E-10    | 0.786559916  | 8.69E-53  | -0.393887637 | 1.61E-10    |
| 0.767863191  | 6.68E-49    | 0.899679644  | 1.92E-89  | -0.372621932 | 1.73E-09    |
| 0.634521301  | 5.23E-29    | 0.905228952  | 2.70E-92  | -0.350817526 | 1.67E-08    |
| 0.781598641  | 1.02E-51    | 0.878786369  | 4.92E-80  | -0.258888793 | 4.10E-05    |
| 0.557580272  | 2.04E-21    | 0.819778376  | 9.27E-61  | -0.27170515  | 1.61E-05    |
| -0.57029513  | 1.55E-22    | -0.842619235 | 2.90E-67  | 0.466831111  | 1.16E-14    |
| -0.509837411 | 1.30E-17    | -0.420139397 | 6.75E-12  | 0.195746177  | 0.002083423 |
| 0.295412087  | 2.53E-06    | 0.692215672  | 2.79E-36  | -0.112362802 | 0.079203814 |
| -0.31555276  | 4.57E-07    | -0.521534342 | 1.72E-18  | 0.534381663  | 1.71E-19    |
| 0.292653808  | 3.17E-06    | 0.768323599  | 5.42E-49  | -0.454178118 | 7.16E-14    |
| 0.460998598  | 2.70E-14    | 0.628927703  | 2.20E-28  | -0.310132091 | 7.34E-07    |
| -0.219273157 | 0.000546673 | -0.315578008 | 4.56E-07  | 0.121316992  | 0.057932316 |
| 0.415526016  | 1.20E-11    | 0.723459684  | 5.55E-41  | -0.253558602 | 5.96E-05    |
| 0.745157955  | 1.20E-44    | 0.688668238  | 8.75E-36  | -0.158256373 | 0.013135114 |
| 0.475691036  | 3.08E-15    | 0.737096632  | 3.04E-43  | -0.157243193 | 0.013739389 |
| 0.611340525  | 1.68E-26    | 0.707792904  | 1.51E-38  | -0.258933565 | 4.09E-05    |
| -0.282062471 | 7.33E-06    | -0.423308199 | 4.52E-12  | 0.668402584  | 4.42E-33    |
| -0.268345075 | 2.07E-05    | -0.403417887 | 5.27E-11  | 0.668071288  | 4.87E-33    |
| -0.070801336 | 0.269621475 | 0.406059597  | 3.83E-11  | -0.306466756 | 1.01E-06    |
| -0.714882566 | 1.25E-39    | -0.6734898   | 9.70E-34  | 0.196402505  | 0.002011011 |
| 0.649422241  | 9.79E-31    | 0.465887051  | 1.33E-14  | -0.212065398 | 0.000836435 |
| -0.309014924 | 8.08E-07    | -0.48808946  | 4.53E-16  | 0.009092806  | 0.887395971 |
| -0.042038367 | 0.512513436 | -0.313396974 | 5.53E-07  | 0.304869418  | 1.15E-06    |



|              |             |              |             |              |             |
|--------------|-------------|--------------|-------------|--------------|-------------|
| 0.57610858   | 4.60E-23    | 0.73251687   | 1.81E-42    | -0.398380017 | 9.56E-11    |
| -0.239372049 | 0.000155109 | -0.451969343 | 9.76E-14    | 0.43429309   | 1.08E-12    |
| 0.547529372  | 1.45E-20    | 0.503392537  | 3.82E-17    | -0.292961869 | 3.09E-06    |
| 0.698357402  | 3.71E-37    | 0.920555899  | 3.45E-101   | -0.409570669 | 2.51E-11    |
| -0.262505779 | 3.17E-05    | -0.424598278 | 3.83E-12    | 0.363730818  | 4.46E-09    |
| 0.841029963  | 8.87E-67    | 0.834155534  | 9.72E-65    | -0.31306205  | 5.69E-07    |
| 0.510176284  | 1.22E-17    | 0.834784057  | 6.39E-65    | -0.268720086 | 2.01E-05    |
| -0.439503865 | 5.41E-13    | -0.65456161  | 2.36E-31    | 0.504135018  | 3.37E-17    |
| -0.287442356 | 4.81E-06    | -0.53773564  | 9.21E-20    | 0.414286468  | 1.40E-11    |
| -0.439370697 | 5.51E-13    | -0.810250359 | 2.59E-58    | 0.39536817   | 1.36E-10    |
| 0.124538216  | 0.051540893 | 0.59622088   | 5.65E-25    | -0.305869435 | 1.06E-06    |
| 0.560277751  | 1.19E-21    | 0.656862281  | 1.23E-31    | -0.192936178 | 0.002421092 |
| 0.373181803  | 1.63E-09    | 0.685794148  | 2.18E-35    | -0.428338785 | 2.36E-12    |
| 0.527894847  | 5.56E-19    | 0.635254496  | 4.32E-29    | -0.428186665 | 2.41E-12    |
| -0.168808024 | 0.008102237 | -0.644638219 | 3.60E-30    | 0.348274365  | 2.15E-08    |
| -0.153911302 | 0.015902009 | -0.433124639 | 1.26E-12    | 0.060124645  | 0.34868921  |
| -0.19842255  | 0.001802309 | -0.497955293 | 9.32E-17    | 0.075271764  | 0.240463066 |
| 0.292041514  | 3.33E-06    | -0.068063018 | 0.288627421 | 0.115236653  | 0.071778986 |
| -0.132632568 | 0.038024991 | -0.379641916 | 8.07E-10    | 0.148566661  | 0.019993534 |
| -0.384250839 | 4.84E-10    | -0.682446322 | 6.24E-35    | 0.206701479  | 0.001137694 |
| -0.106140826 | 0.097407141 | -0.481714944 | 1.23E-15    | 0.065869843  | 0.30448213  |
| -0.114776284 | 0.072928757 | -0.398333402 | 9.61E-11    | 0.14007089   | 0.028375049 |
| 0.321140123  | 2.78E-07    | 0.37808673   | 9.58E-10    | 0.075378299  | 0.239796234 |
| -0.306358925 | 1.01E-06    | -0.666606974 | 7.49E-33    | 0.226953807  | 0.000342198 |
| -0.090640217 | 0.157244105 | -0.361746854 | 5.48E-09    | 0.221485299  | 0.000478449 |
| -0.12404311  | 0.052483319 | -0.303186568 | 1.33E-06    | 0.179886996  | 0.004737614 |
| -0.143096577 | 0.025097367 | -0.431227238 | 1.62E-12    | 0.148689208  | 0.019890352 |
| -0.306423721 | 1.01E-06    | -0.609430311 | 2.65E-26    | 0.256770177  | 4.76E-05    |
| -0.126396713 | 0.048127976 | -0.353412927 | 1.28E-08    | 0.120229276  | 0.06023309  |
| 0.005543749  | 0.931203852 | -0.475761606 | 3.05E-15    | 0.169241766  | 0.007938309 |
| -0.126512862 | 0.0479211   | -0.406458292 | 3.65E-11    | 0.210841429  | 0.000897853 |
| -0.310104769 | 7.36E-07    | -0.710294059 | 6.33E-39    | 0.257356093  | 4.57E-05    |
| -0.084843942 | 0.185631264 | -0.442024995 | 3.85E-13    | 0.15505714   | 0.015126889 |
| -0.27731752  | 1.06E-05    | -0.522080361 | 1.56E-18    | 0.190027282  | 0.002822411 |
| -0.175840361 | 0.00578372  | -0.676960501 | 3.39E-34    | 0.196532723  | 0.00199692  |
| -0.130620751 | 0.041068018 | -0.6275276   | 3.14E-28    | 0.317691649  | 3.79E-07    |
| -0.297261905 | 2.17E-06    | -0.394151377 | 1.57E-10    | 0.224251589  | 0.000404241 |
| -0.456214076 | 5.36E-14    | -0.798117025 | 2.17E-55    | 0.226332068  | 0.000355634 |
| -0.171782235 | 0.007036117 | -0.423950261 | 4.16E-12    | 0.079366816  | 0.215757707 |
| -0.10233047  | 0.110102892 | -0.476272162 | 2.82E-15    | 0.138796057  | 0.029862095 |

|              |             |              |             |              |             |
|--------------|-------------|--------------|-------------|--------------|-------------|
| -0.11891396  | 0.063115315 | -0.500196949 | 6.46E-17    | 0.157847542  | 0.013376077 |
| -0.257292886 | 4.59E-05    | -0.625648626 | 5.04E-28    | 0.182849465  | 0.004083226 |
| -0.300709612 | 1.63E-06    | -0.725904786 | 2.23E-41    | 0.195635315  | 0.002095886 |
| -0.297952821 | 2.05E-06    | -0.660449161 | 4.46E-32    | 0.319271712  | 3.29E-07    |
| -0.284838655 | 5.90E-06    | -0.660673587 | 4.18E-32    | 0.167834766  | 0.008481073 |
| -0.221829114 | 0.000468583 | -0.595179141 | 7.16E-25    | 0.271648364  | 1.62E-05    |
| -0.119110065 | 0.062678543 | -0.587216115 | 4.21E-24    | 0.123068514  | 0.054380294 |
| -0.219403981 | 0.0005424   | -0.558982561 | 1.55E-21    | 0.089648559  | 0.161853786 |
| -0.165038882 | 0.009658376 | -0.493620728 | 1.88E-16    | 0.189114057  | 0.002960324 |
| -0.221068191 | 0.000490676 | -0.564243535 | 5.37E-22    | 0.106377475  | 0.096658709 |
| -0.124269981 | 0.052049712 | -0.482374832 | 1.11E-15    | -0.086538886 | 0.17696633  |
| -0.296307135 | 2.35E-06    | -0.692198719 | 2.81E-36    | 0.311043391  | 6.78E-07    |
| -0.312022362 | 6.23E-07    | -0.471717434 | 5.60E-15    | 0.11367236   | 0.07574689  |
| -0.284764983 | 5.94E-06    | -0.583225312 | 1.00E-23    | 0.055772853  | 0.384740201 |
| 0.085152517  | 0.184030974 | -0.182966852 | 0.004059063 | 0.261013453  | 3.53E-05    |
| -0.015310627 | 0.811541701 | -0.422020461 | 5.32E-12    | 0.058408341  | 0.362644735 |
| -0.103650019 | 0.105566831 | -0.27886074  | 9.39E-06    | 0.055068007  | 0.39078535  |
| -0.090360623 | 0.158533661 | -0.257504404 | 4.52E-05    | 0.27793109   | 1.01E-05    |
| -0.007811558 | 0.903178767 | -0.294803013 | 2.66E-06    | 0.183529977  | 0.003944932 |
| 0.433613772  | 1.19E-12    | 0.639133796  | 1.56E-29    | -0.109823639 | 0.086269475 |
| -0.123109056 | 0.054300265 | -0.222435977 | 0.000451629 | 0.111267339  | 0.082192551 |
| -0.267868542 | 2.14E-05    | -0.578975535 | 2.50E-23    | 0.083890613  | 0.190639856 |
| -0.158208698 | 0.013163015 | -0.494916525 | 1.53E-16    | 0.134864616  | 0.034874051 |
| -0.227396371 | 0.000332923 | -0.534536578 | 1.66E-19    | 0.250645069  | 7.29E-05    |
| -0.016175859 | 0.801107624 | 0.123613533  | 0.05331257  | -0.002316279 | 0.97122644  |
| -0.226696706 | 0.000347696 | -0.478392568 | 2.04E-15    | 0.183495857  | 0.003951764 |
| -0.256357451 | 4.90E-05    | -0.673408605 | 9.94E-34    | 0.365228407  | 3.81E-09    |
| -0.247139449 | 9.25E-05    | -0.61708233  | 4.21E-27    | 0.340889049  | 4.42E-08    |
| -0.141206086 | 0.027104704 | -0.366141442 | 3.46E-09    | 0.093731664  | 0.143507882 |
| -0.414460812 | 1.37E-11    | -0.749194382 | 2.28E-45    | 0.390725893  | 2.32E-10    |
| -0.241239067 | 0.000137208 | -0.611976625 | 1.44E-26    | 0.308520676  | 8.43E-07    |
| 0.118987285  | 0.062951713 | -0.374595779 | 1.40E-09    | 0.238921825  | 0.000159741 |
| -0.068491601 | 0.285594945 | -0.477041661 | 2.51E-15    | 0.278732642  | 9.48E-06    |
| -0.389498756 | 2.67E-10    | -0.479157194 | 1.82E-15    | 0.080923852  | 0.206858101 |
| 0.124244888  | 0.052097525 | 0.600099451  | 2.34E-25    | -0.204249216 | 0.001306211 |
| -0.067330139 | 0.29386279  | -0.595317603 | 6.94E-25    | 0.159528975  | 0.012409292 |
| 0.134133924  | 0.035880226 | -0.316934216 | 4.05E-07    | 0.325095144  | 1.94E-07    |
| -0.173222107 | 0.006566459 | -0.253300563 | 6.07E-05    | 0.022110946  | 0.730573144 |
| -0.296623401 | 2.29E-06    | -0.625689883 | 4.99E-28    | 0.151317319  | 0.017786105 |
| -0.335889343 | 7.13E-08    | -0.738869326 | 1.51E-43    | 0.319101838  | 3.34E-07    |

|              |             |              |             |              |             |
|--------------|-------------|--------------|-------------|--------------|-------------|
| -0.357388426 | 8.58E-09    | -0.691188364 | 3.89E-36    | 0.288449258  | 4.44E-06    |
| -0.155883028 | 0.014588905 | -0.225483843 | 0.000374756 | 0.289544545  | 4.07E-06    |
| -0.319006754 | 3.37E-07    | -0.55812965  | 1.83E-21    | 0.167189338  | 0.008740906 |
| 0.001576766  | 0.980410633 | -0.350648399 | 1.70E-08    | 0.259764315  | 3.85E-05    |
| 0.084702389  | 0.18636878  | -0.377950152 | 9.72E-10    | 0.12274953   | 0.055013387 |
| -0.265165986 | 2.61E-05    | -0.692325192 | 2.69E-36    | 0.221225518  | 0.00048603  |
| -0.327790375 | 1.52E-07    | -0.550197489 | 8.68E-21    | -0.019648101 | 0.759606027 |
| -0.219940097 | 0.00052521  | -0.668268734 | 4.60E-33    | 0.471133287  | 6.11E-15    |
| -0.077080491 | 0.229317158 | -0.567852545 | 2.57E-22    | 0.366298285  | 3.40E-09    |
| -0.179741039 | 0.004772168 | -0.440010639 | 5.05E-13    | 0.150510326  | 0.018410596 |
| -0.20368631  | 0.001347992 | -0.547785491 | 1.38E-20    | 0.19569288   | 0.002089406 |
| -0.149353006 | 0.019339444 | -0.417282394 | 9.67E-12    | 0.343687558  | 3.37E-08    |
| -0.23634937  | 0.000188786 | -0.547475994 | 1.47E-20    | 0.079667662  | 0.214017135 |
| -0.004823285 | 0.940126634 | -0.088000778 | 0.16973649  | -0.006676967 | 0.917187009 |
| -0.325802792 | 1.82E-07    | -0.731124196 | 3.09E-42    | 0.340318665  | 4.67E-08    |
| -0.387388409 | 3.40E-10    | -0.735704732 | 5.26E-43    | 0.273244629  | 1.44E-05    |
| -0.194521202 | 0.002224963 | -0.359797347 | 6.70E-09    | -0.000485272 | 0.993970558 |
| -0.249125436 | 8.09E-05    | -0.560440614 | 1.15E-21    | 0.087567166  | 0.171857591 |
| -0.249668222 | 7.79E-05    | -0.595436116 | 6.75E-25    | 0.264622381  | 2.72E-05    |
| -0.146812173 | 0.021522466 | -0.391724004 | 2.07E-10    | 0.026426743  | 0.680632294 |
| -0.134789308 | 0.034976632 | -0.358661408 | 7.53E-09    | 0.122655865  | 0.055200441 |
| -0.23082166  | 0.000268662 | -0.531721478 | 2.78E-19    | 0.286064358  | 5.36E-06    |
| -0.300954964 | 1.60E-06    | -0.571038351 | 1.33E-22    | 0.082807184  | 0.196451192 |
| -0.269388511 | 1.92E-05    | -0.704980968 | 3.98E-38    | 0.331865999  | 1.04E-07    |
| -0.252887277 | 6.25E-05    | -0.64301392  | 5.57E-30    | 0.207040726  | 0.001116023 |
| -0.093952748 | 0.142561744 | -0.239061649 | 0.000158289 | 0.067830656  | 0.290280508 |
| 0.015742535  | 0.806328914 | -0.423047676 | 4.67E-12    | 0.133956894  | 0.036127668 |
| -0.229556734 | 0.000290913 | -0.509548331 | 1.36E-17    | 0.111021692  | 0.082875069 |
| -0.280569472 | 8.23E-06    | -0.460759397 | 2.80E-14    | 0.106865792  | 0.095128791 |
| -0.195281222 | 0.00213615  | -0.628538963 | 2.43E-28    | 0.24265121   | 0.000124974 |
| -0.21962969  | 0.0005351   | -0.609229177 | 2.78E-26    | 0.358701428  | 7.50E-09    |
| -0.223877342 | 0.000413614 | -0.504742853 | 3.05E-17    | 0.227325677  | 0.000334389 |
| -0.266273884 | 2.41E-05    | -0.586406754 | 5.03E-24    | 0.182714951  | 0.004111075 |
| -0.154309939 | 0.015628495 | -0.511893039 | 9.14E-18    | 0.268408654  | 2.06E-05    |
| -0.227038668 | 0.000340401 | -0.578410385 | 2.82E-23    | 0.079760224  | 0.213483639 |
| 0.204750585  | 0.001270001 | -0.153592773 | 0.016123556 | 0.277370219  | 1.05E-05    |
| 0.148825438  | 0.019776193 | 0.202269549  | 0.001458629 | -0.01361584  | 0.832074642 |
| -0.290432406 | 3.79E-06    | -0.736292038 | 4.18E-43    | 0.371479315  | 1.96E-09    |
| -0.237165433 | 0.000179077 | -0.652512216 | 4.17E-31    | 0.281789288  | 7.49E-06    |
| -0.016556872 | 0.796523927 | -0.22882358  | 0.000304582 | 0.357842196  | 8.19E-09    |

|              |             |              |             |              |             |
|--------------|-------------|--------------|-------------|--------------|-------------|
| -0.200532223 | 0.001605631 | -0.565661442 | 4.02E-22    | 0.308543624  | 8.42E-07    |
| -0.241170566 | 0.000137829 | -0.716343745 | 7.42E-40    | 0.242149307  | 0.0001292   |
| -0.153330691 | 0.01630786  | -0.39492092  | 1.43E-10    | 0.036656178  | 0.567987683 |
| -0.381734535 | 6.40E-10    | -0.734765984 | 7.58E-43    | 0.346078243  | 2.67E-08    |
| 0.390180763  | 2.47E-10    | 0.627778268  | 2.95E-28    | -0.22306518  | 0.000434652 |
| -0.330642994 | 1.17E-07    | -0.648437394 | 1.28E-30    | 0.201488698  | 0.001523104 |
| 0.110294031  | 0.084923654 | -0.377135481 | 1.06E-09    | 0.243358945  | 0.000119235 |
| -0.281883332 | 7.44E-06    | -0.661593094 | 3.21E-32    | 0.145740254  | 0.022505532 |
| -0.355141651 | 1.08E-08    | -0.776701122 | 1.08E-50    | 0.351734465  | 1.52E-08    |
| 0.158638292  | 0.012913467 | -0.398992703 | 8.90E-11    | 0.254878873  | 5.44E-05    |
| -0.312307359 | 6.08E-07    | -0.645609368 | 2.77E-30    | 0.167113062  | 0.008772075 |
| -0.052311479 | 0.414972116 | -0.535387966 | 1.42E-19    | 0.298814614  | 1.91E-06    |
| -0.468560263 | 8.95E-15    | -0.787455686 | 5.53E-53    | 0.317978577  | 3.69E-07    |
| 0.266612634  | 2.35E-05    | 0.437927205  | 6.68E-13    | -0.029762159 | 0.642954563 |
| -0.102503059 | 0.109501047 | -0.41051898  | 2.23E-11    | 0.189696301  | 0.002871707 |
| -0.151754179 | 0.0174558   | -0.511715882 | 9.42E-18    | 0.294270049  | 2.78E-06    |
| 0.316945856  | 4.04E-07    | 0.548310202  | 1.25E-20    | -0.095904363 | 0.134415042 |
| -0.265299339 | 2.59E-05    | -0.654129459 | 2.66E-31    | 0.37197907   | 1.86E-09    |
| -0.139230223 | 0.029348347 | -0.406057044 | 3.84E-11    | 0.086373842  | 0.177796673 |
| -0.133727704 | 0.036450164 | -0.270816832 | 1.72E-05    | 0.326639319  | 1.69E-07    |
| -0.359238542 | 7.10E-09    | -0.719710104 | 2.20E-40    | 0.23815492   | 0.00016793  |
| -0.166514806 | 0.009019987 | -0.363308419 | 4.66E-09    | 0.155886337  | 0.014586784 |
| -0.05107507  | 0.426100351 | -0.487908549 | 4.66E-16    | 0.35927903   | 7.07E-09    |
| -0.403482283 | 5.22E-11    | -0.764879493 | 2.58E-48    | 0.241335101  | 0.000136342 |
| -0.020498386 | 0.749542109 | -0.049038679 | 0.444801003 | 0.018069092  | 0.778401617 |
| -0.062097293 | 0.333074277 | -0.323961058 | 2.16E-07    | 0.39749537   | 1.06E-10    |
| -0.212599288 | 0.000810878 | -0.680891239 | 1.01E-34    | 0.252602742  | 6.37E-05    |
| -0.488539415 | 4.22E-16    | -0.718356043 | 3.59E-40    | 0.225116429  | 0.000383331 |
| -0.106150819 | 0.097375444 | -0.469629081 | 7.64E-15    | 0.169671617  | 0.007778772 |
| -0.366642538 | 3.28E-09    | -0.62823318  | 2.63E-28    | 0.196976137  | 0.001949611 |
| -0.187364076 | 0.003241799 | -0.441286769 | 4.25E-13    | 0.03262111   | 0.611365577 |
| -0.156692665 | 0.014077855 | -0.375797191 | 1.23E-09    | -0.058929793 | 0.358368437 |
| -0.386696143 | 3.67E-10    | -0.705995316 | 2.81E-38    | 0.263419077  | 2.97E-05    |
| -0.194693506 | 0.002204539 | -0.524108141 | 1.09E-18    | 0.219980766  | 0.000523927 |
| -0.231798346 | 0.000252578 | -0.518882061 | 2.74E-18    | 0.062952332  | 0.326447612 |
| -0.28134369  | 7.75E-06    | -0.668740844 | 4.00E-33    | 0.353386051  | 1.29E-08    |
| -0.050426979 | 0.432001905 | -0.252808669 | 6.28E-05    | 0.136578591  | 0.032607452 |
| -0.140904625 | 0.027437205 | -0.351367913 | 1.58E-08    | 0.073288723  | 0.253112964 |
| -0.272657137 | 1.50E-05    | -0.623703793 | 8.21E-28    | 0.190313944  | 0.002780338 |
| -0.04292156  | 0.50368613  | -0.253518797 | 5.98E-05    | -0.078054972 | 0.223465905 |

|              |             |              |          |             |             |
|--------------|-------------|--------------|----------|-------------|-------------|
| -0.246683096 | 9.54E-05    | -0.616763844 | 4.54E-27 | 0.187316166 | 0.003249835 |
| -0.200270895 | 0.00162888  | -0.685698817 | 2.25E-35 | 0.260820556 | 3.57E-05    |
| -0.128162835 | 0.045061625 | -0.571390175 | 1.24E-22 | 0.098414294 | 0.124469423 |
| -0.23282067  | 0.000236706 | -0.512196521 | 8.68E-18 | 0.103321641 | 0.10668165  |
